# Supplementary material for: Unveiling the intricacy of gapmer oligonucleotides through advanced tandem mass spectrometry approaches and scan accumulation for 2DMS
Source: Royal Society of Chemistry journal article supplement (doi:10.1039/d4an00484a), 2024-01-01
Supplement: d4an00484a1.pdf [file d4an00484a1.pdf]

# Supporting Information - Unveiling the intricacy of gapmer oligonucleotides through advanced tandem mass spectrometry approaches and scan accumulation for 2DMS

Mohammed Rahman<sup>1,2</sup>, Bryan P. Marzullo<sup>1</sup>, Pui Yiu Lam<sup>1</sup>, Mark Barrow<sup>1</sup>, Stephen W. Holman<sup>3</sup>, Andrew D. Ray<sup>4</sup> and Peter B. O'Connor<sup>1</sup>

<sup>1</sup>Department of Chemistry, University of Warwick, Coventry, CV4 7AL, UK

<sup>2</sup>Department of Physics, University of Warwick, Coventry, CV4 7AL, UK

<sup>3</sup>Chemical Development, Pharmaceutical Technology & Development, Operations, AstraZeneca, Macclesfield, SK10 4TF, UK

<sup>4</sup>New Modalities Parental Development, Pharmaceutical Technology & Development, Operations, AstraZeneca, Macclesfield, SK10 4TF, UK

The Supporting information encompasses Supporting experimental mass spectra and modelled spectra, complete with detailed interpretations and mass tables. Additionally, it provides extra experimental details and the Python code for simulation, facilitating future researchers in reproducing these results.

## Table of Contents

|                                                                                                                                                                                                                                                    |    |
|----------------------------------------------------------------------------------------------------------------------------------------------------------------------------------------------------------------------------------------------------|----|
| Section 1: Supporting Experimental Section .....                                                                                                                                                                                                   | 6  |
| Section 2: Supporting Figures .....                                                                                                                                                                                                                | 6  |
| Supporting Figure S1 Nomenclature for Oligonucleotide fragmentation based on Mcluckey cleavages based on Scheme 1, where the locked nucleic acid forms a bridge between the 2 carbon and 4 carbon. ....                                            | 7  |
| Supporting Figure S2 2D Pulse sequence, where the increment delay was fixed by the number of scans and subsequently averaged after accumulation.....                                                                                               | 7  |
| Supporting Figure S3 MS spectrum of danvatirsen after desalting using HyperSep™ C18 plates. ....                                                                                                                                                   | 8  |
| Supporting Figure S4 MS spectrum of MALAT-1 after desalting HyperSep™ C18 plates. ....                                                                                                                                                             | 8  |
| Supporting Figure S5 MS spectrum of danvatirsen after desalting HyperSep™ C18 plates highlighting the [M-8H] <sup>8-</sup> and a phosphate impurity in the phosphorothioate backbone, with the simulated spectrum (bottom).....                    | 9  |
| Supporting Figure S6 MS spectrum of MALAT-1 after desalting HyperSep™ C18 plates highlighting the [M-8H] <sup>8-</sup> , a phosphate impurity in the phosphorothioate backbone, sodium and disodium adducts, with the simulated spectrum (bottom). | 9  |
| Supporting Figure S7 MS spectrum of danvatirsen, [M-8H] <sup>8-</sup> , with the simulated spectrum (red). ....                                                                                                                                    | 10 |
| Supporting Figure S8 MS spectrum of MALAT-1, [M-8H] <sup>8-</sup> , with the simulated spectrum (red). ....                                                                                                                                        | 10 |

|                                                                                                                                                                                                                                                                                                                                                                                                                                                                                                                                                                                             |    |
|---------------------------------------------------------------------------------------------------------------------------------------------------------------------------------------------------------------------------------------------------------------------------------------------------------------------------------------------------------------------------------------------------------------------------------------------------------------------------------------------------------------------------------------------------------------------------------------------|----|
| Supporting Figure S9 EDD-MS/MS spectrum of danvatirsen, [M-8H] <sup>8-</sup> , at 22.8 eV bias for 0.5 s irradiation time, with cleavage diagrams overlaid on top. ....                                                                                                                                                                                                                                                                                                                                                                                                                     | 11 |
| Supporting Figure S10 CID-MS/MS spectrum of danvatirsen, [M-8H] <sup>8-</sup> , at -9.2 V, with cleavage diagrams overlaid on top. ....                                                                                                                                                                                                                                                                                                                                                                                                                                                     | 12 |
| Supporting Figure S11 UVPD-MS/MS spectrum of danvatirsen, [M-8H] <sup>8-</sup> , using 2 shots of 3.4 mJ laser power, with cleavage diagrams overlaid on top. ....                                                                                                                                                                                                                                                                                                                                                                                                                          | 13 |
| Supporting Figure S12 IRMPD-MS/MS spectrum of danvatirsen, [M-8H] <sup>8-</sup> , at 27.5 % laser power for 0.06 s irradiation time, with cleavage diagrams overlaid on top. ....                                                                                                                                                                                                                                                                                                                                                                                                           | 14 |
| Supporting Figure S13 Isotope pattern of w <sub>4</sub> <sup>2-</sup> ion (C <sub>43</sub> H <sub>54</sub> N <sub>16</sub> O <sub>23</sub> P <sub>4</sub> S <sub>4</sub> ) of MALAT-1, obtained from UVPD-MS/MS (Supporting Table S4), where the peak areas (%) are overlaid on top. The A+2 peak corresponds to a molecule with one <sup>34</sup> S atom (shaded) and two <sup>13</sup> C atoms, and its fine isotopic pattern allows for the resolution of these isotopes. This observation confirms the presence of four sulfur atoms, as expected for a phosphorothioate backbone. .... | 15 |
| Supporting Figure S14 Beeswarm plot of the relative intensities for each McLuckey cleavage and its analogues of MALAT-1 (Navy) and danvatirsen (Orange) produced by Tandem MS using CID, EDD, IRMPD, and UVPD. Each point represents a single peak, which is evenly spaced in the x-axis to prevent overlap, where 20-50% of the peaks are plotted due to the large number of peaks. Zoom-in on EDD is provided due to low abundance of peaks. Total number of peaks is overlaid on top, see Table 1. ....                                                                                  | 16 |
| Supporting Figure S15 The presence of an additional oxygen in danvatirsen indicates the occurrence of oxidative degradation. The observed low intensity suggests that the precursor is inherently unstable and undergoes degradation upon exposure to oxygen. ....                                                                                                                                                                                                                                                                                                                          | 17 |
| Supporting Figure S16 2D-EDD-MS of danvatirsen performed with 22.8 eV bias for 0.5 s irradiation time (1M x-axis by 2048 y-axis data points) ....                                                                                                                                                                                                                                                                                                                                                                                                                                           | 18 |
| Supporting Figure S16A Autocorrelation line (equivalent to 1DMS, mass list available in Supporting Table S9) ....                                                                                                                                                                                                                                                                                                                                                                                                                                                                           | 18 |
| Supporting Figure S16B 2DEDD-MS Fragment line extracted from the [M-6H] <sup>6-</sup> precursor in Figure 4 ....                                                                                                                                                                                                                                                                                                                                                                                                                                                                            | 19 |
| Supporting Figure S16C 2DEDD-MS Fragment line extracted from the [M-7H] <sup>7-</sup> precursor in Figure 4 ....                                                                                                                                                                                                                                                                                                                                                                                                                                                                            | 19 |
| Supporting Figure S16D Fragments from the [M-8H] <sup>8-</sup> precursor ion (Supporting Table S10), with the sequence coverage overlaid on top. ....                                                                                                                                                                                                                                                                                                                                                                                                                                       | 20 |
| Supporting Figure S16E 2DEDD-MS vertical line, which corresponds to a W <sub>8</sub> <sup>3-</sup> fragment from the autocorrelation line at m/z 922.426746, marked by an asterisk (*).....                                                                                                                                                                                                                                                                                                                                                                                                 | 21 |
| Supporting Figure S17 Fragmentation efficiency of [M-8H] <sup>8-</sup> danvatirsen vs. amplitude of the initial evolution pulse (Supporting Figure S2) with a 1 μs pulse length when using A) laser-based dissociation (from IR laser) and B) electron-based dissociation (from a hollow-cathode lamp operating at 22.8 eV) ....                                                                                                                                                                                                                                                            | 22 |
| Supporting Figure S18A Extracted 2DUVPD-MS/MS fragments of [M-7H] <sup>7-</sup> precursor with denoising sane rank 10 of a single scan (top, ~350 peaks) and 8 scan accumulated (bottom, ~520 peaks). ....                                                                                                                                                                                                                                                                                                                                                                                  | 23 |
| Supporting Figure S18B Cleavage diagram of the 2DUVPD-MS/MS fragments of [M-7H] <sup>7-</sup> after a single scan with denoising. ....                                                                                                                                                                                                                                                                                                                                                                                                                                                      | 23 |

|                                                                                                                                                                                                                                                                                                                                                       |    |
|-------------------------------------------------------------------------------------------------------------------------------------------------------------------------------------------------------------------------------------------------------------------------------------------------------------------------------------------------------|----|
| Supporting Figure S18C Cleavage diagram of the 2DUVPD-MS/MS fragments of [M-7H] <sup>7-</sup> after 8 scan accumulated with denoising. ....                                                                                                                                                                                                           | 23 |
| Supporting Figure S19A Extracted 2DUVPD-MS/MS fragments of [M-7H] <sup>7-</sup> precursor without denoising of a single scan (top, ~460 peaks) and 8 scan accumulated (bottom, ~700 peaks).....                                                                                                                                                       | 24 |
| Supporting Figure S19B Cleavage diagram of the 2DUVPD-MS/MS fragments of [M-7H] <sup>7-</sup> after a single scan with denoising. ....                                                                                                                                                                                                                | 24 |
| Supporting Figure S19C Cleavage diagram of the 2DUVPD-MS/MS fragments of [M-7H] <sup>7-</sup> after 8 scan accumulated with denoising. ....                                                                                                                                                                                                           | 24 |
| Section 2: Simulation of 2DMS.....                                                                                                                                                                                                                                                                                                                    | 25 |
| Supporting Figure S20 An ideal transient would have a steady decay in the A) x-dimension, typical of a 1DMS. Transient in B) y-dimension would remain constant assuming the spray is consistent and there is no electrostatic buildup occurring within the source or ion optics. ....                                                                 | 25 |
| Supporting Figure S21 Transient in A) x-dimension and B) y-dimension with added noise (~ 20%), ideally there would be little to no noise. ....                                                                                                                                                                                                        | 25 |
| Supporting Figure S22 Transient in A) x-dimension and B) y-dimension with 8-fold increase in noise compared to Supporting Figure S22, emulating the spectra of low intensity peaks. ....                                                                                                                                                              | 26 |
| Supporting Figure S23 A) Sum of transients generated from 2DMS (using noise threshold defined in Supporting Figure S23) and the B) Contour plot after 2DFFT, subsequent C) summation of Fourier Transformed spectra with the respective S/N calculation. Signal was determined by the maximum signal and noise adjacent to the peak was averaged..... | 27 |
| Supporting Figure S24 Equivalent spectra as S24 but with twice the number of rows ( <i>N</i> = 64).....                                                                                                                                                                                                                                               | 28 |
| Supporting Figure S25 Equivalent spectra as S24 but with four times the number of rows ( <i>N</i> = 128).....                                                                                                                                                                                                                                         | 29 |
| Supporting Figure S26 Equivalent spectra as S24 but with eight times the number of rows ( <i>N</i> = 256).....                                                                                                                                                                                                                                        | 30 |
| Supporting Figure S27 Zoom region of 8 scan accumulated 2DMS of danvatirsen, the presence of two distinct precursors is evident, as indicated by the presence of two intense contours—one corresponding to the [M-7H] <sup>7-</sup> precursor and the other to a PO impurity.....                                                                     | 31 |
| Python code for simulation: .....                                                                                                                                                                                                                                                                                                                     | 32 |
| Section 3: Code for generating oligonucleotide mass list.....                                                                                                                                                                                                                                                                                         | 34 |
| Supporting Figure S27 Define the inputs for the oligonucleotide mass calculator by customising the elemental formula for the coloured regions. ....                                                                                                                                                                                                   | 34 |
| Section 4: Tables of peak lists.....                                                                                                                                                                                                                                                                                                                  | 35 |
| Table S1 showing peak list, signal-to-noise ratio (S/N), elemental composition, and possible assignments with mass errors (ppm) of the [M-8H] <sup>8-</sup> MALAT-1 by EDD MS/MS, internal fragments marked by character (J), base losses are shown inside the parenthesis. ....                                                                      | 35 |
| Table S2 showing peak list, signal-to-noise ratio (S/N), elemental composition, and possible assignments with mass errors (ppm) of the [M-8H] <sup>8-</sup> MALAT-1 by CID MS/MS, internal fragments marked by character (J), base losses are shown inside the parenthesis. ....                                                                      | 38 |

|                                                                                                                                                                                                                                                                                                   |     |
|---------------------------------------------------------------------------------------------------------------------------------------------------------------------------------------------------------------------------------------------------------------------------------------------------|-----|
| Table S3 showing peak list, signal-to-noise ratio (S/N), elemental composition, and possible assignments with mass errors (ppm) of the [M-8H] <sup>8-</sup> MALAT-1 by IRMPD MS/MS, internal fragments marked by character (J), base losses are shown inside the parenthesis. ....                | 44  |
| Table S4 showing peak list, signal-to-noise ratio (S/N), elemental composition, and possible assignments with mass errors (ppm) of the [M-8H] <sup>8-</sup> MALAT-1 by UVPD MS/MS, internal fragments marked by character (J), base losses are shown inside the parenthesis. ....                 | 50  |
| Table S5 showing peak list, signal-to-noise ratio (S/N), elemental composition, and possible assignments with mass errors (ppm) of the [M-8H] <sup>8-</sup> danvatirsen by EDD MS/MS, internal fragments marked by character (J), base losses are shown inside the parenthesis. ....              | 56  |
| Table S6 showing peak list, signal-to-noise ratio (S/N), elemental composition, and possible assignments with mass errors (ppm) of the [M-8H] <sup>8-</sup> danvatirsen by CID MS/MS, internal fragments marked by character (J), base losses are shown inside the parenthesis. ....              | 61  |
| Table S7 showing peak list, signal-to-noise ratio (S/N), elemental composition, and possible assignments with mass errors (ppm) of the [M-8H] <sup>8-</sup> danvatirsen by IRMPD MS/MS, internal fragments marked by character (J), base losses are shown inside the parenthesis. ....            | 67  |
| Table S8 showing peak list, signal-to-noise ratio (S/N), elemental composition, and possible assignments with mass errors (ppm) of the [M-8H] <sup>8-</sup> danvatirsen by UVPD MS/MS, internal fragments marked by character (J), base losses are shown inside the parenthesis. ....             | 72  |
| Table S9 showing peak list, signal-to-noise ratio (S/N), elemental composition, and possible assignments with mass errors (ppm) of the autocorrelation line of danvatirsen by 2D-EDD-MS.....                                                                                                      | 79  |
| Table S10 showing peak list, signal-to-noise ratio (S/N), elemental composition, and possible assignments with mass errors (ppm) of the [M-8H] <sup>8-</sup> danvatirsen precursor ion by 2D-EDD-MS. ....                                                                                         | 85  |
| Table S11 showing peak list, signal-to-noise ratio (S/N), elemental composition, and possible assignments with mass errors (ppm) of the [M-7H] <sup>7-</sup> danvatirsen precursor ion by 2D-EDD-MS. ....                                                                                         | 87  |
| Table S12 showing peak list, signal-to-noise ratio (S/N), elemental composition, and possible assignments with mass errors (ppm) of the [M-6H] <sup>6-</sup> danvatirsen precursor ion by 2D-EDD-MS. ....                                                                                         | 88  |
| Table S13 showing peak list, intensity, elemental composition, and possible assignments with mass errors (ppm) of danvatirsen using 2D-UVPD-MS of one scan denoised (sane rank 10) [M-8H] <sup>8-</sup> precursor ion (note, noise peaks were included to highlight the effect of denoising)..... | 90  |
| Table S14 showing peak list, intensity, elemental composition, and possible assignments with mass errors (ppm) of danvatirsen using 2D-UVPD-MS of one scan denoised (sane rank 10) [M-7H] <sup>7-</sup> precursor ion (note, noise peaks were included to highlight the effect of denoising)..... | 95  |
| Table S15 showing peak list, intensity, elemental composition, and possible assignments with mass errors (ppm) of danvatirsen using 2D-UVPD-MS of one scan and no denoising of [M-8H] <sup>8-</sup> precursor ion (note, noise peaks were included to highlight the effect of denoising). ....    | 102 |

|                                                                                                                                                                                                                                                                                                                  |     |
|------------------------------------------------------------------------------------------------------------------------------------------------------------------------------------------------------------------------------------------------------------------------------------------------------------------|-----|
| 338.157835 .....                                                                                                                                                                                                                                                                                                 | 102 |
| Table S16 showing peak list, intensity, elemental composition, and possible assignments with mass errors (ppm) of danvatirsen using 2D-UVPD-MS of one scan and no denoising of [M-7H] <sup>7-</sup> precursor ion (note, noise peaks were included to highlight the effect of denoising).....                    | 111 |
| Table S17 showing peak list, intensity, elemental composition, and possible assignments with mass errors (ppm) of danvatirsen using 2D-UVPD-MS of eight scans accumulated denoised (same rank 10) [M-8H] <sup>8-</sup> precursor ion (note, noise peaks were included to highlight the effect of denoising)..... | 120 |
| Table S18 showing peak list, intensity, elemental composition, and possible assignments with mass errors (ppm) of danvatirsen using 2D-UVPD-MS of eight scans accumulated denoised (same rank 10) [M-7H] <sup>7-</sup> precursor ion (note, noise peaks were included to highlight the effect of denoising)..... | 132 |
| Table S19 showing peak list, intensity, elemental composition, and possible assignments with mass errors (ppm) of danvatirsen using 2D-UVPD-MS of eight scans accumulated and no denoising of [M-8H] <sup>8-</sup> precursor ion (note, noise peaks were included to highlight the effect of denoising). .....   | 142 |
| Table S20 showing peak list, intensity, elemental composition, and possible assignments with mass errors (ppm) of danvatirsen using 2D-UVPD-MS of eight scans accumulated and no denoising of [M-7H] <sup>7-</sup> precursor ion (note, noise peaks were included to highlight the effect of denoising). .....   | 152 |
| Supporting References.....                                                                                                                                                                                                                                                                                       | 166 |

## Section 1: Supporting Experimental Section

The denoising algorithm of sane (rank = 10) was used, which is a memory efficient development of the proposed uncoiled random QR denoising (urQRd) algorithm,<sup>1</sup> and is publicly available from SPIKE.<sup>2</sup> To extract the signal from the noise, the original dataset is truncated by randomly sampling the original matrix, breaking up any patterns that could contribute to the noise. This truncated dataset is then subjected to QR decomposition using a specified rank, allowing for the separation of signal and noise. After QR decomposition is applied, the resulting orthogonal matrix (Q) is multiplied by the truncated data set to reconstruct the original data with the noise removed.<sup>1</sup> Subsequently, QR decomposition is iterated to successive rows ( $t_1$  rows or scan lines) until the entire matrix is factorised; this iterative approach allows for parallel processing of rows. Furthermore, the rank used in QR, which is the number of linearly independent rows/columns in the matrix used for the reconstruction of the original dataset, was previously shown to affect the quality of denoising by Chiron *et al.*, where an optimised signal-to-noise ratio (SNR) gain was observed by selecting a rank (rank is doubled for urQRd) equivalent to the number of expected precursor ions observed in the  $y$ -axis.<sup>1</sup> Due to the number of precursor ions observed in Section 3.5, a logical rank of 10 was used for the denoising of danvatirsen.

## Section 2: Supporting Figures

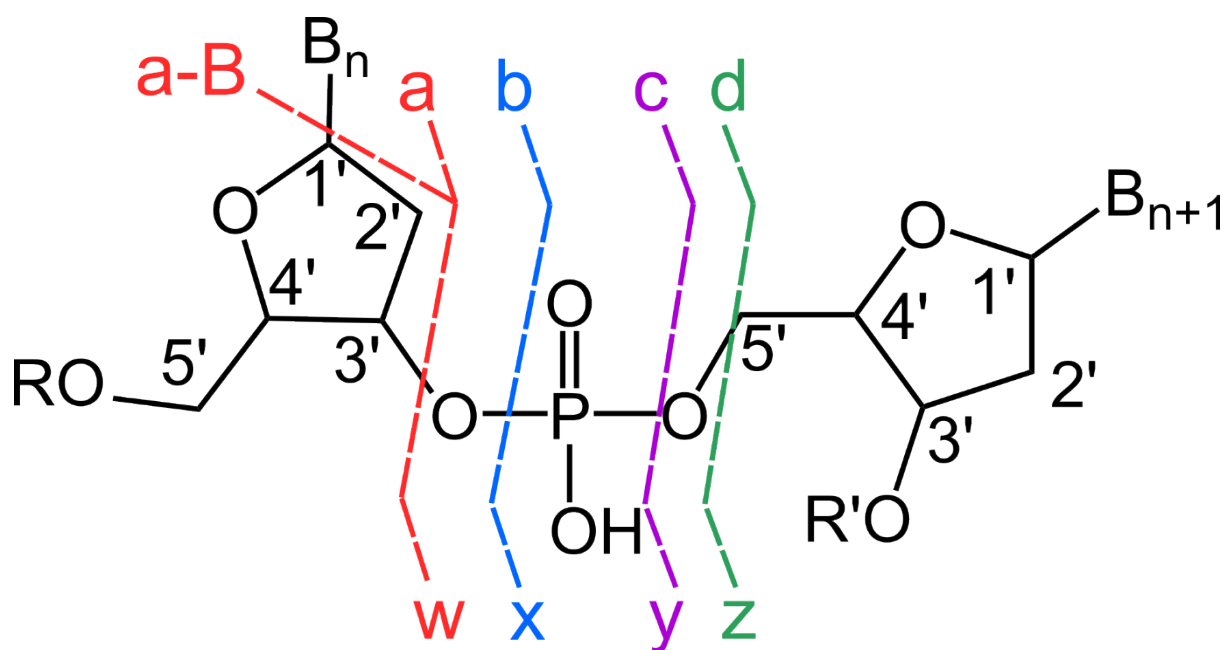

Supporting Figure S1 Nomenclature for Oligonucleotide fragmentation based on Mcluckey cleavages based on Scheme 1, where the locked nucleic acid forms a bridge between the 2 carbon and 4 carbon.

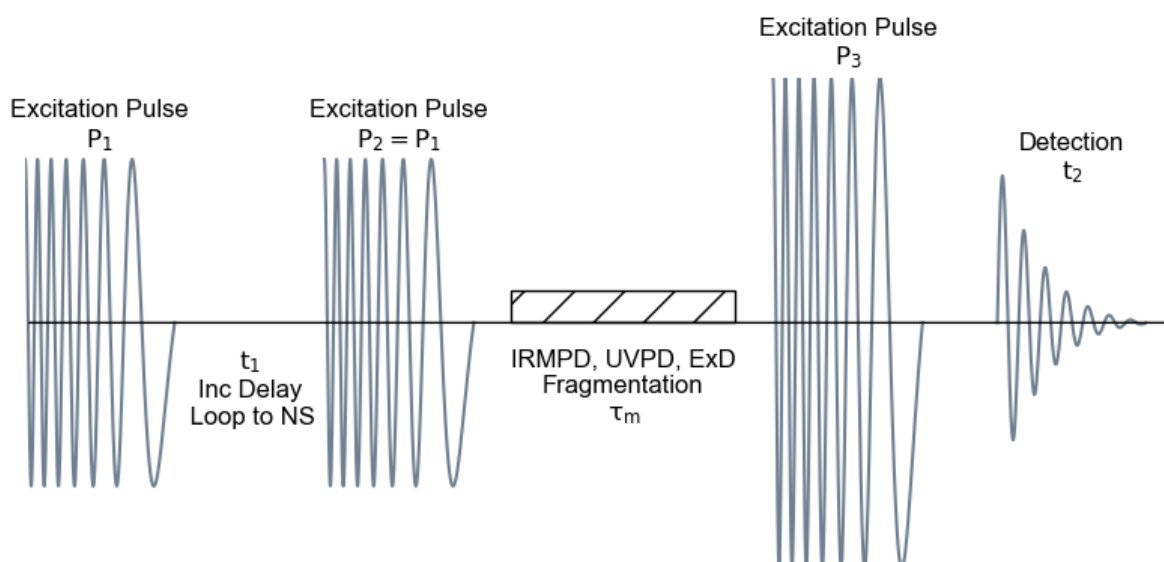

Supporting Figure S2 2D Pulse sequence, where the increment delay was fixed by the number of scans and subsequently averaged after accumulation.

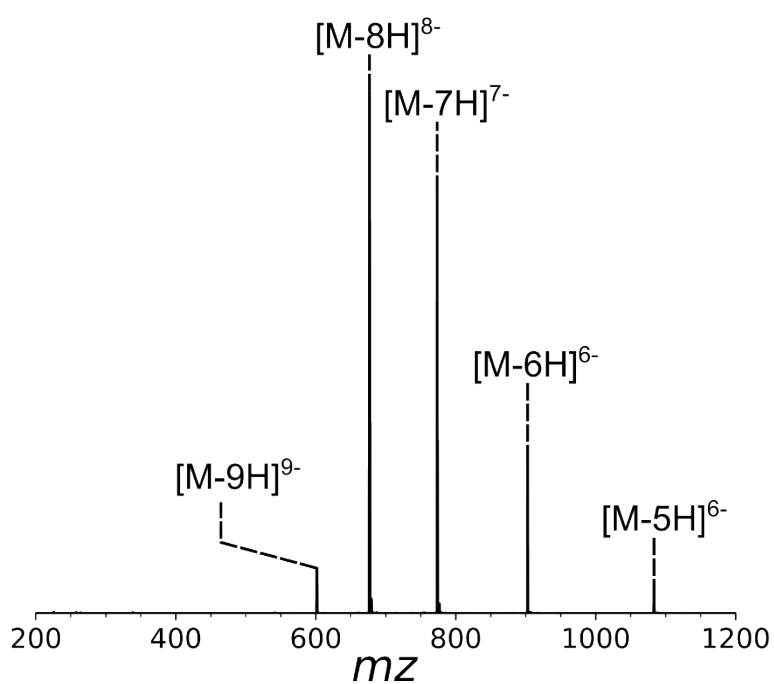

Supporting Figure S3 MS spectrum of danvatirsen after desalting using HyperSep™ C18 plates.

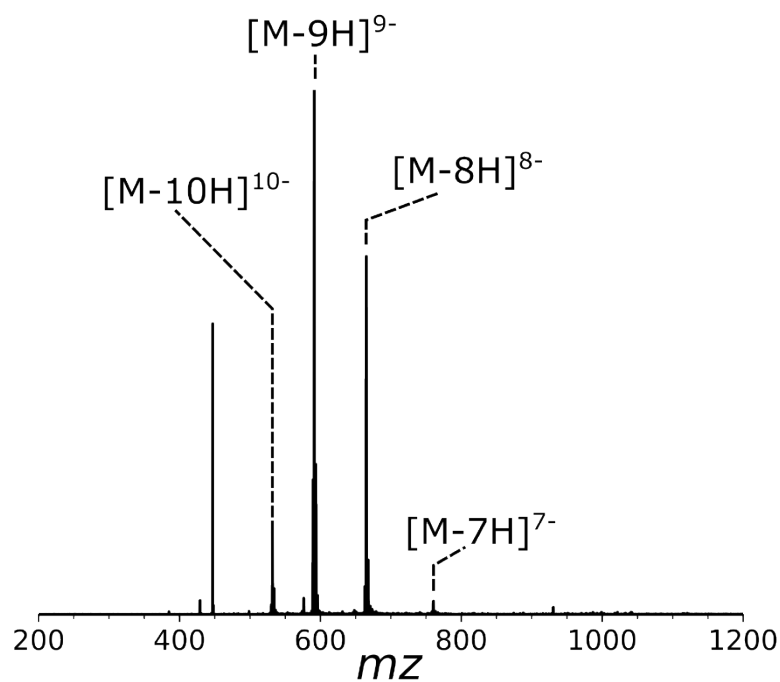

Supporting Figure S4 MS spectrum of MALAT-1 after desalting HyperSep™ C18 plates.

Sample

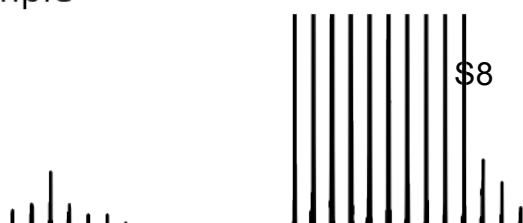



**Supporting Figure S5 MS spectrum of danvatirsen after desalting HyperSep™ C18 plates highlighting the  $[M-8H]^{8-}$  and a phosphate impurity in the phosphorothioate backbone, with the simulated spectrum (bottom).**

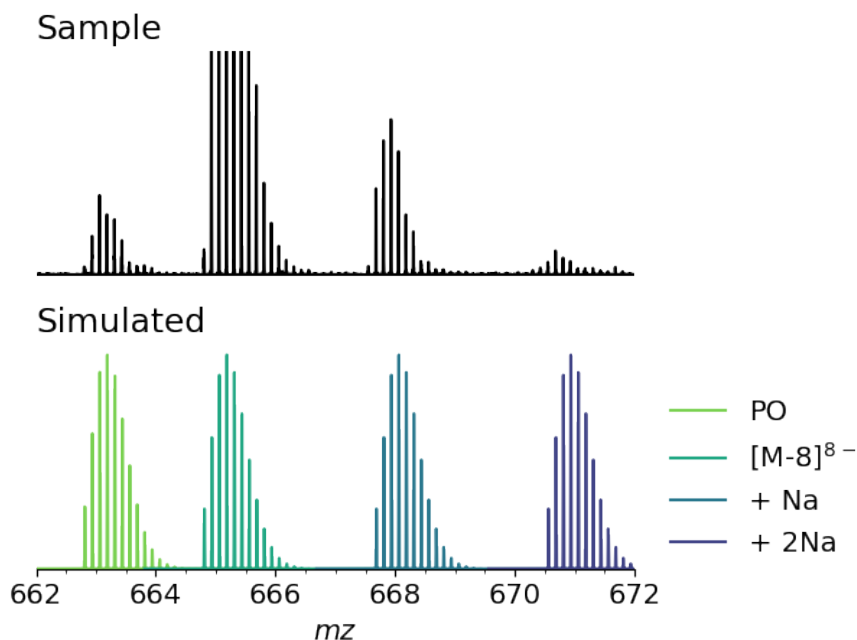

**Supporting Figure S6 MS spectrum of MALAT-1 after desalting HyperSep™ C18 plates highlighting the  $[M-8H]^{8-}$ , a phosphate impurity in the phosphorothioate backbone, sodium and disodium adducts, with the simulated spectrum (bottom).**

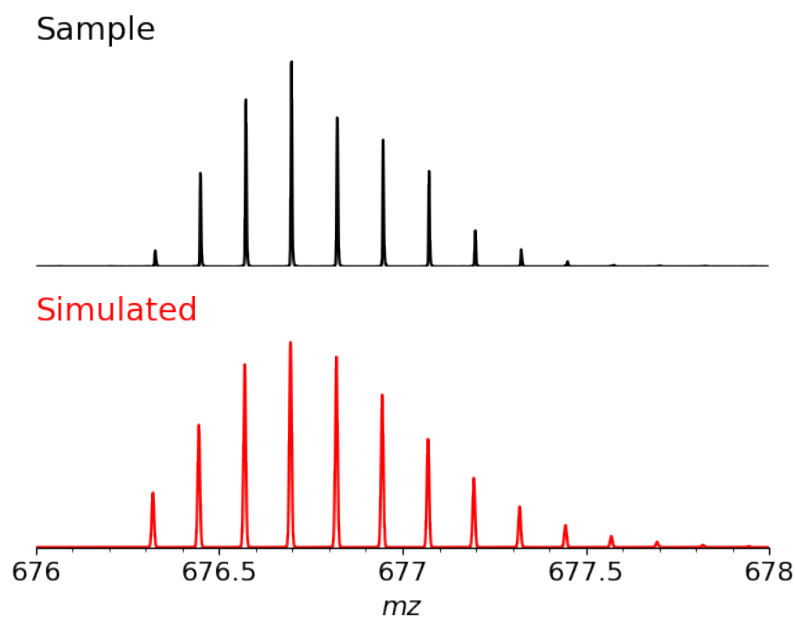

Supporting Figure S7 MS spectrum of danvatirsen, [M-8H]<sup>8-</sup>, with the simulated spectrum (red).

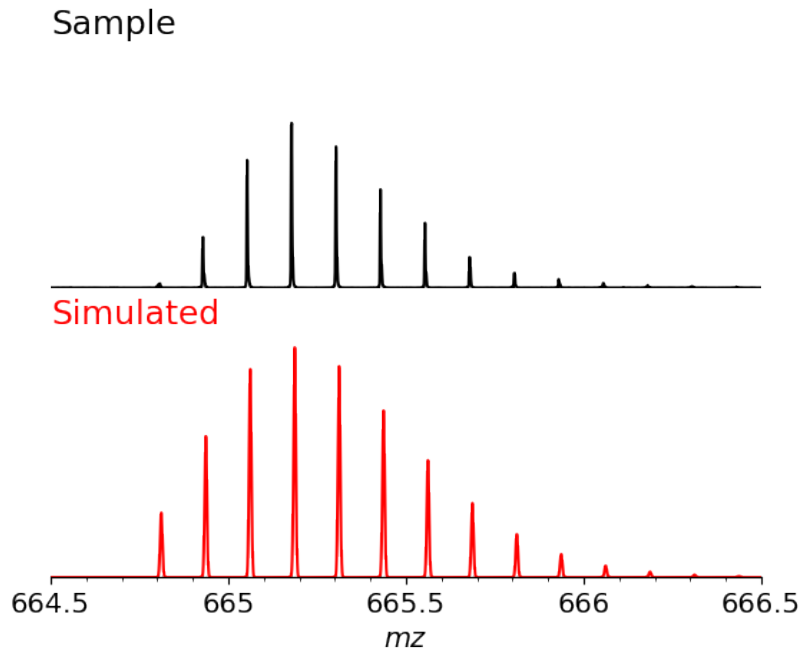

Supporting Figure S8 MS spectrum of MALAT-1, [M-8H]<sup>8-</sup>, with the simulated spectrum (red).

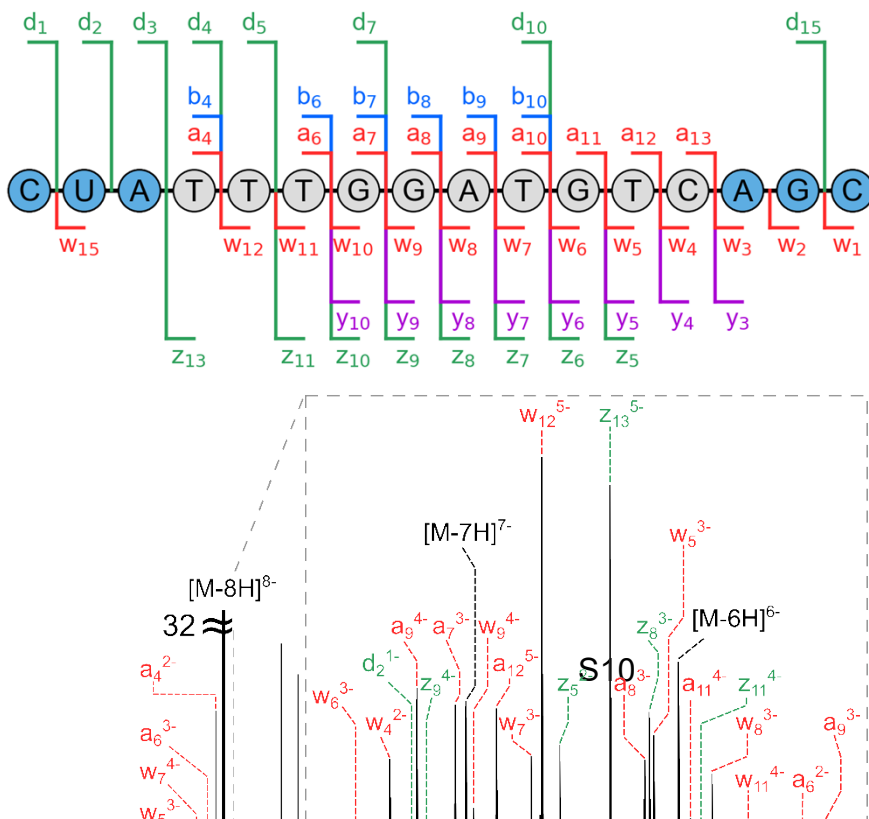

Supporting Figure S9 EDD-MS/MS spectrum of danvatirsen,  $[M-8H]^{8-}$ , at 22.8 eV bias for 0.5 s irradiation time, with cleavage diagrams overlaid on top.

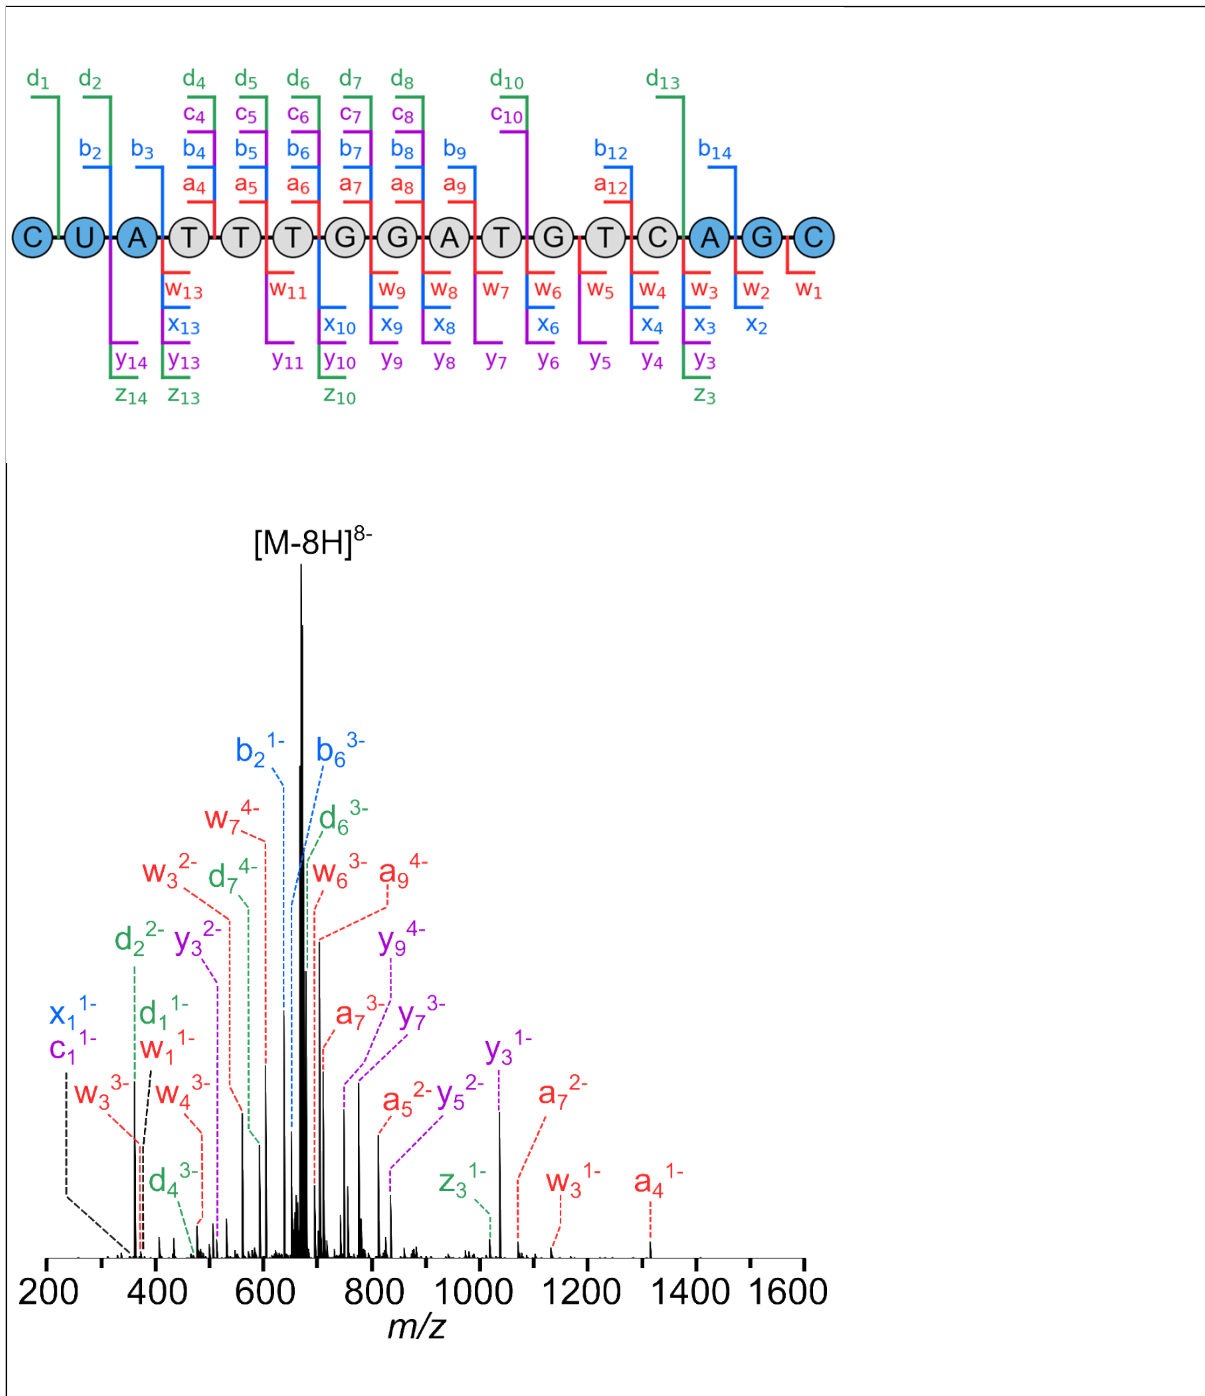

Supporting Figure S10 CID-MS/MS spectrum of danvatirsen,  $[M-8H]^{8-}$ , at -9.2 V, with cleavage diagrams overlaid on top.

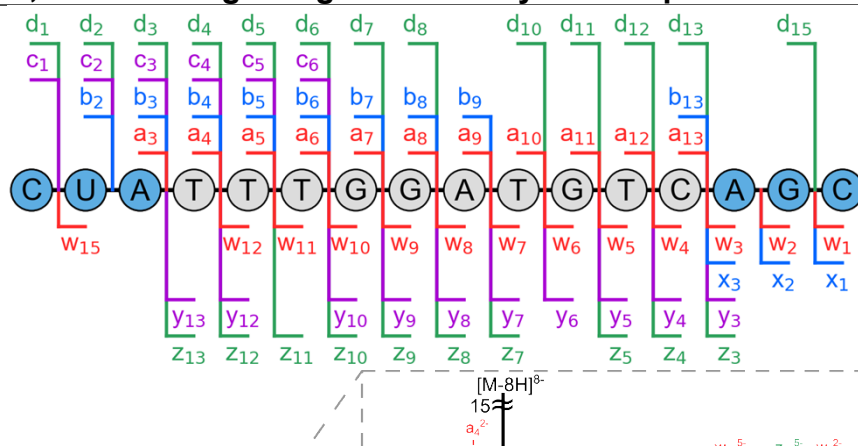

Supporting Figure S11 UVPD-MS/MS spectrum of danvatirsen,  $[M-8H]^{8-}$ , using 2 shots of 3.4 mJ laser power, with cleavage diagrams overlaid on top.

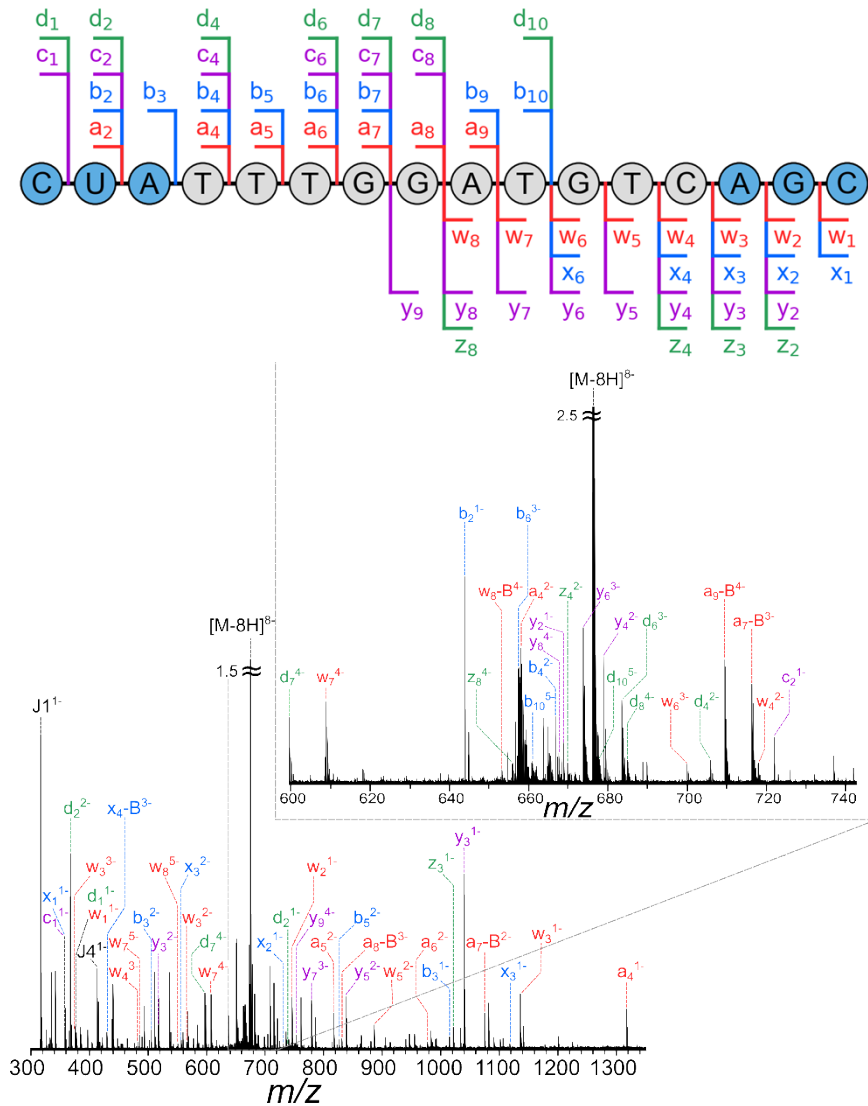

Supporting Figure S12 IRMPD-MS/MS spectrum of danvatirsen,  $[M-8H]^{8-}$ , at 27.5 % laser power for 0.06 s irradiation time, with cleavage diagrams overlaid on top.

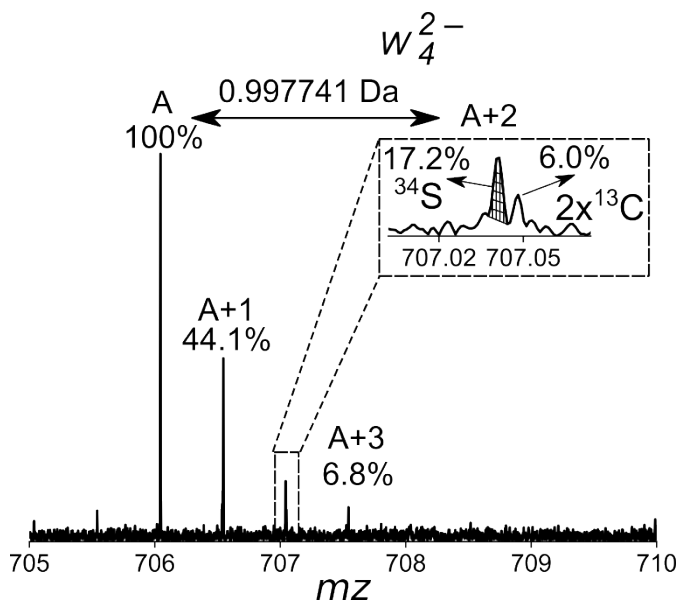

**Supporting Figure S13** Isotope pattern of  $w_4^{2-}$  ion ( $\text{C}_{43}\text{H}_{54}\text{N}_{16}\text{O}_{23}\text{P}_4\text{S}_4$ ) of MALAT-1, obtained from UVPD-MS/MS (Supporting Table S4), where the peak areas (%) are overlaid on top. The A+2 peak corresponds to a molecule with one  $^{34}\text{S}$  atom (shaded) and two  $^{13}\text{C}$  atoms, and its fine isotopic pattern allows for the resolution of these isotopes. This observation confirms the presence of four sulfur atoms, as expected for a phosphorothioate backbone.

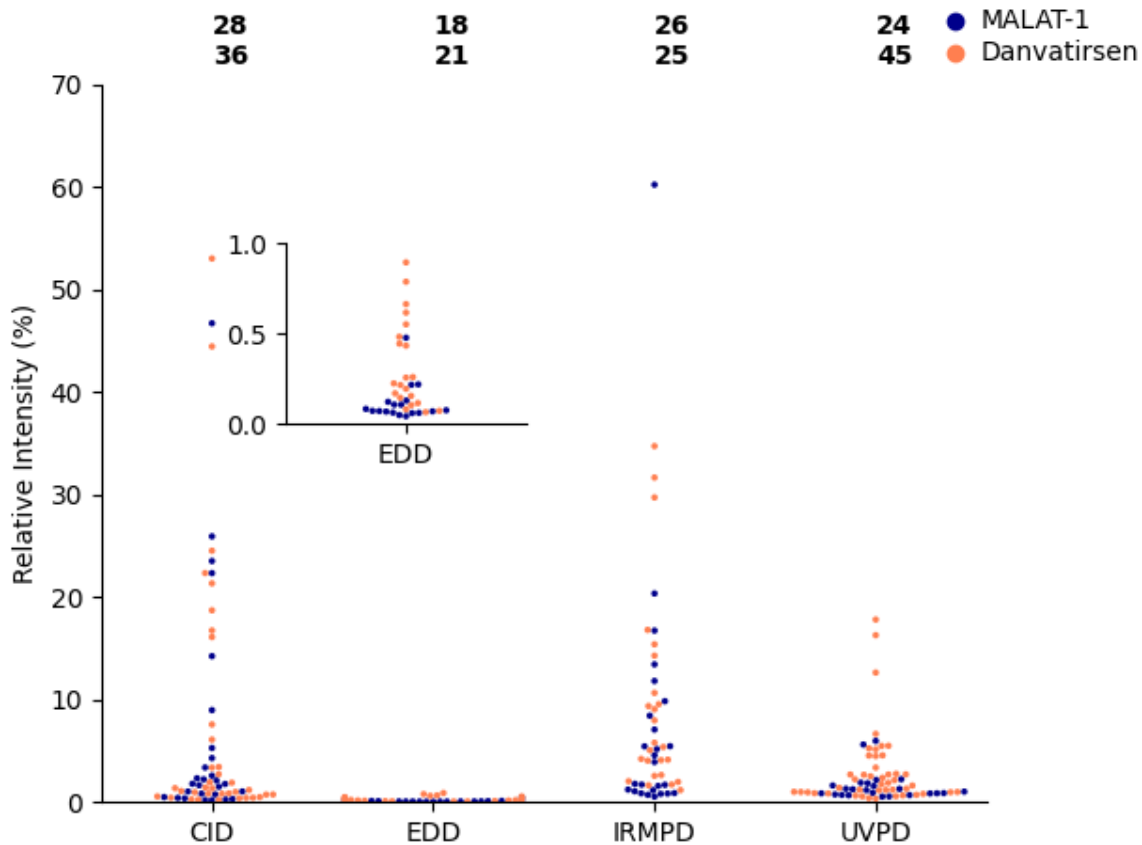

Supporting Figure S14 Beeswarm plot of the relative intensities for each McLuckey cleavage and its analogues of MALAT-1 (Navy) and danvatirsen (Orange) produced by Tandem MS using CID, EDD, IRMPD, and UVPD. Each point represents a single peak, which is evenly spaced in the x-axis to prevent overlap, where 20-50% of the peaks are plotted due to the large number of peaks. Zoom-in on EDD is provided due to low abundance of peaks. Total number of peaks is overlaid on top, see Table 1.

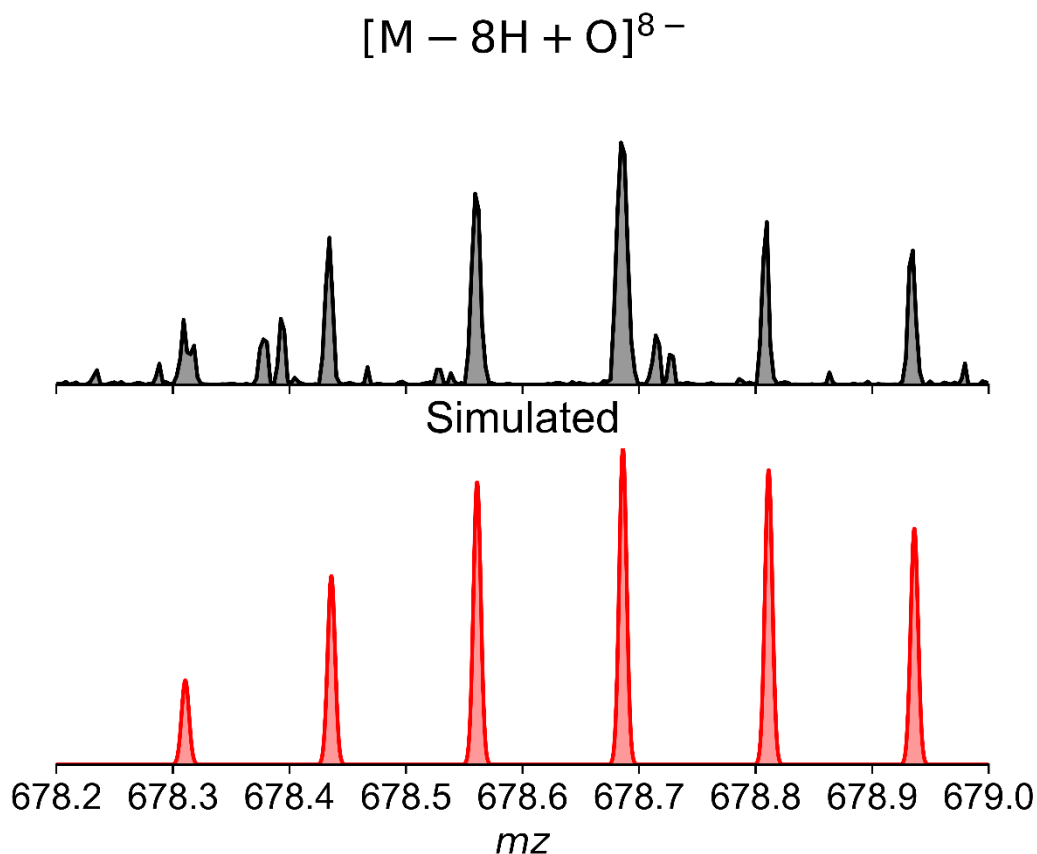

Supporting Figure S15 The presence of an additional oxygen in danvatirsen indicates the occurrence of oxidative degradation. The observed low intensity suggests that the precursor is inherently unstable and undergoes degradation upon exposure to oxygen.

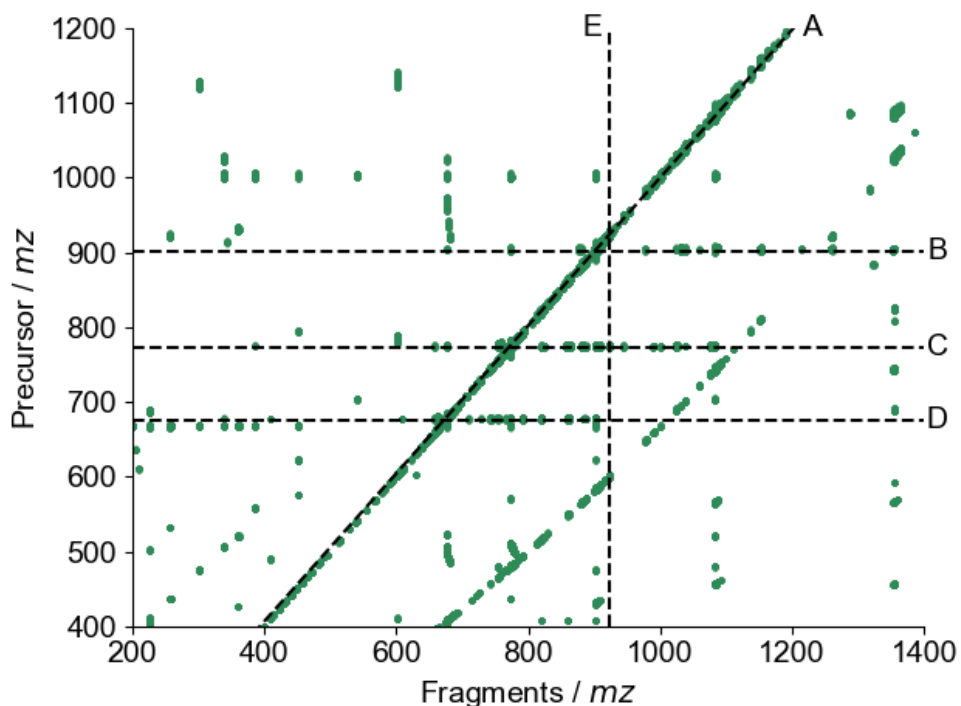

**Supporting Figure S16 2D-EDD-MS of danvatirsen performed with 22.8 eV bias for 0.5 s irradiation time (1M x-axis by 2048 y-axis data points)**

**Supporting Figure S16A Autocorrelation line (equivalent to 1DMS, mass list available in Supporting Table S9)**

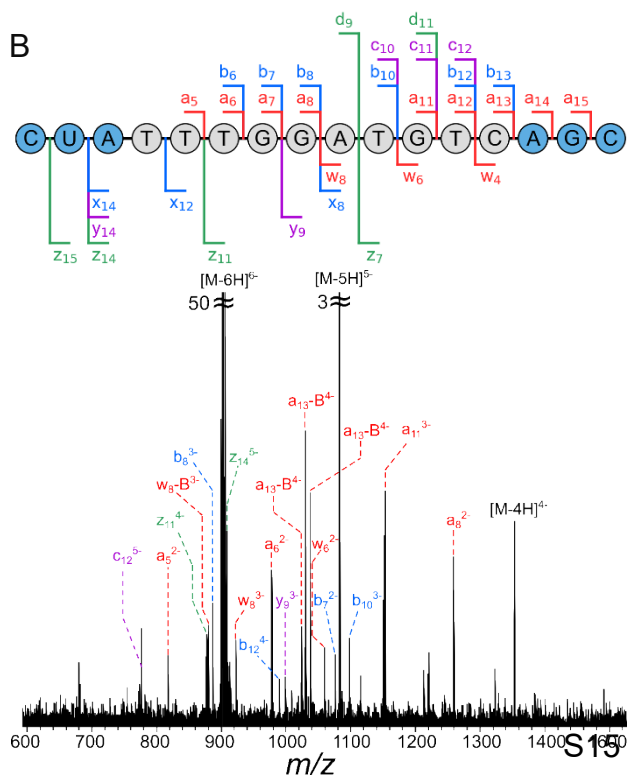

**Supporting Figure S16B 2DEDD-MS Fragment line extracted from the [M-6H]<sup>6-</sup> precursor in Figure 4**

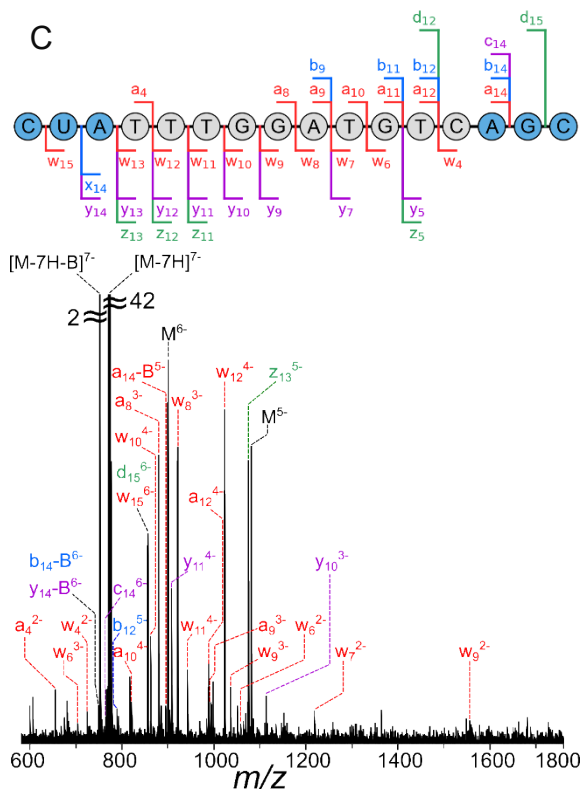

**Supporting Figure S16C 2DEDD-MS Fragment line extracted from the [M-7H]<sup>7-</sup> precursor in Figure 4**

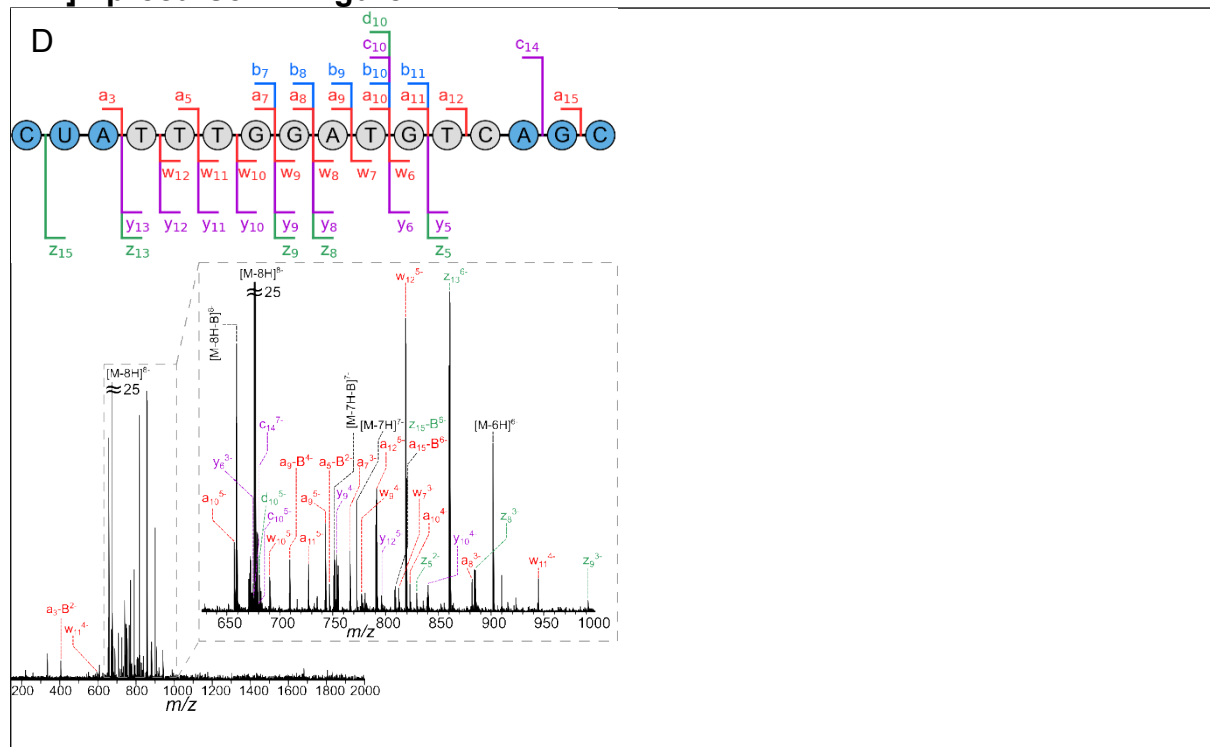

**Supporting Figure S16D Fragments from the [M-8H]<sup>8-</sup> precursor ion (Supporting Table S10), with the sequence coverage overlaid on top.**



E

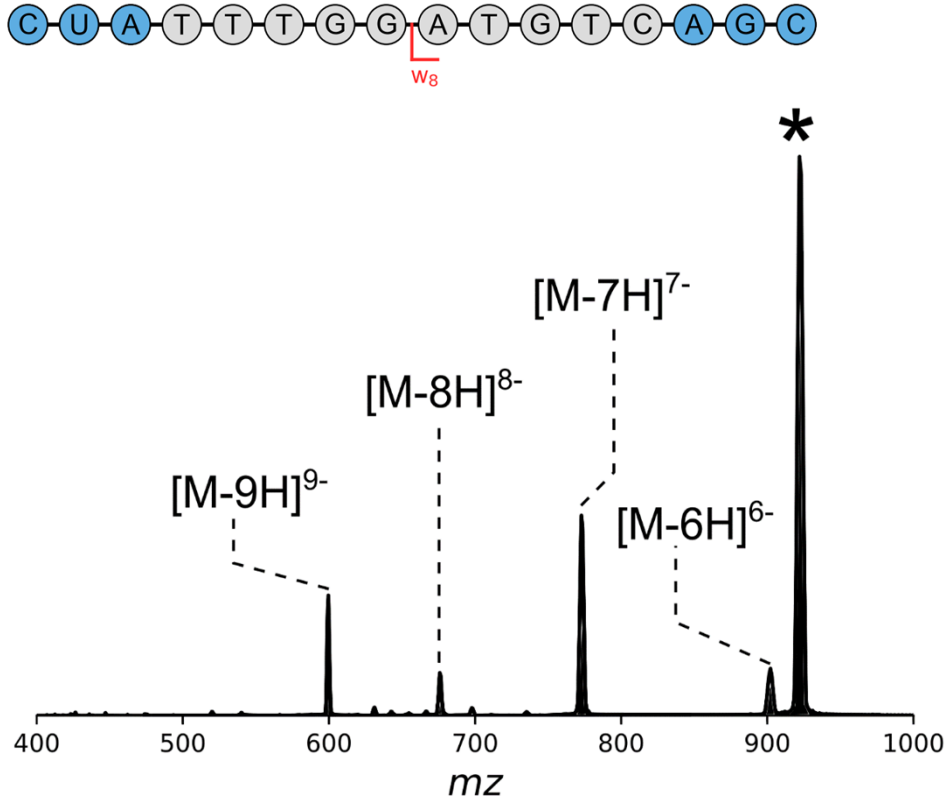

Supporting Figure S16E 2DEDD-MS vertical line, which corresponds to a  $W_8^{3-}$  fragment from the autocorrelation line at  $m/z$  922.426746, marked by an asterisk (\*).

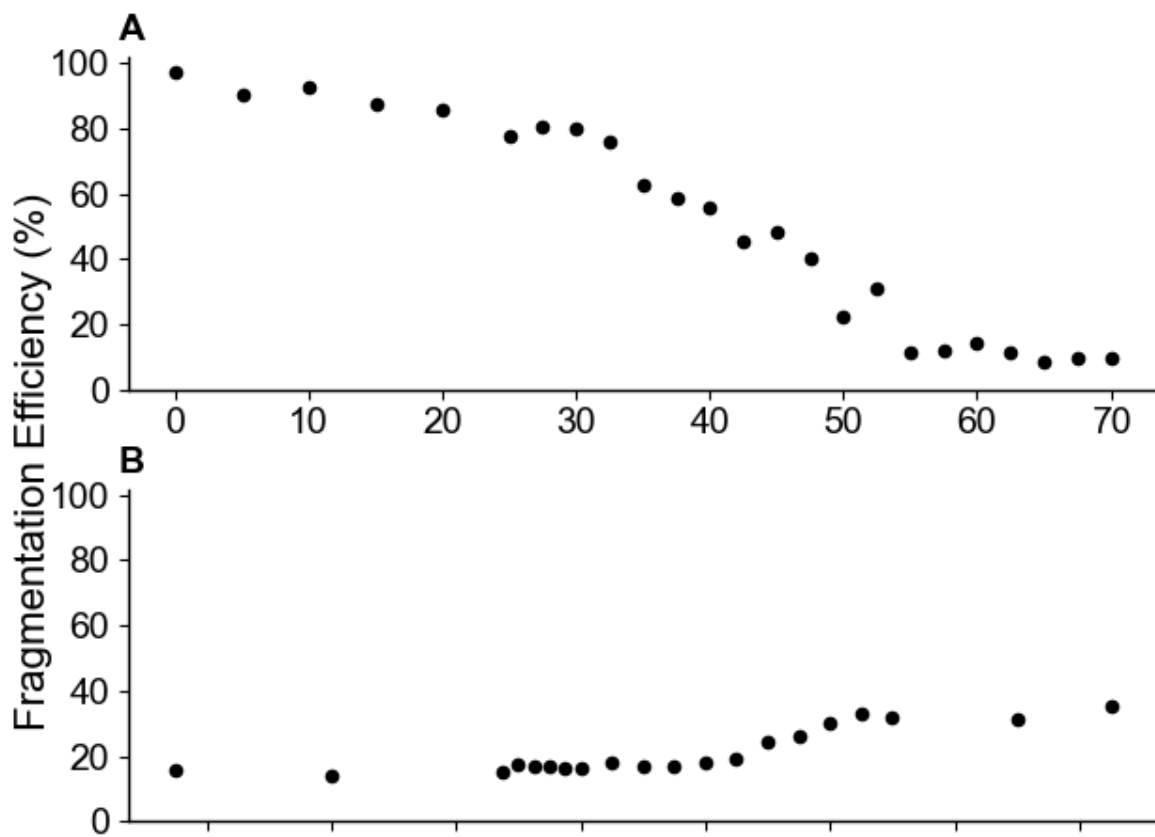

Supporting Figure S17 Fragmentation efficiency of  $[M-8H]^{8-}$  danvatirsen vs. amplitude of the initial evolution pulse (Supporting Figure S2) with a 1  $\mu$ s pulse length when using A) laser-based dissociation (from IR laser) and B) electron-based dissociation (from a hallow-cathode lamp operating at 22.8 eV)

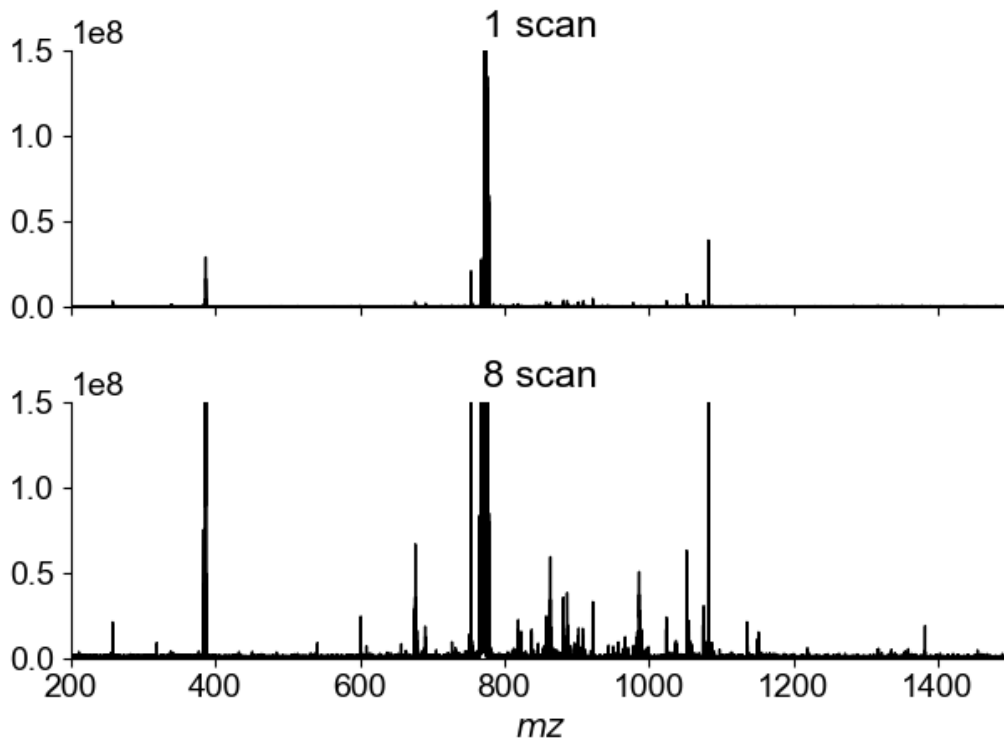

Supporting Figure S18A Extracted 2DUVPD-MS/MS fragments of  $[M-7H]^{7-}$  precursor with denoising same rank 10 of a single scan (top, ~350 peaks) and 8 scan accumulated (bottom, ~520 peaks).

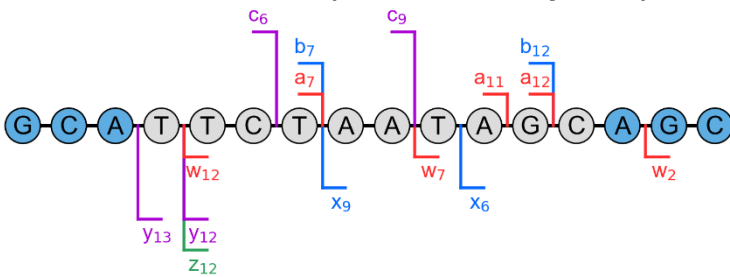

Supporting Figure S18B Cleavage diagram of the 2DUVPD-MS/MS fragments of  $[M-7H]^{7-}$  after a single scan with denoising.

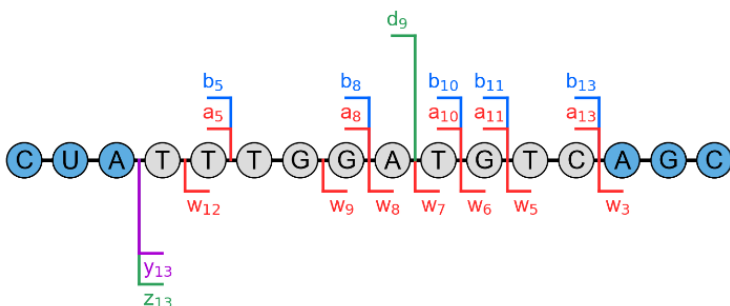

Supporting Figure S18C Cleavage diagram of the 2DUVPD-MS/MS fragments of  $[M-7H]^{7-}$  after 8 scan accumulated with denoising.

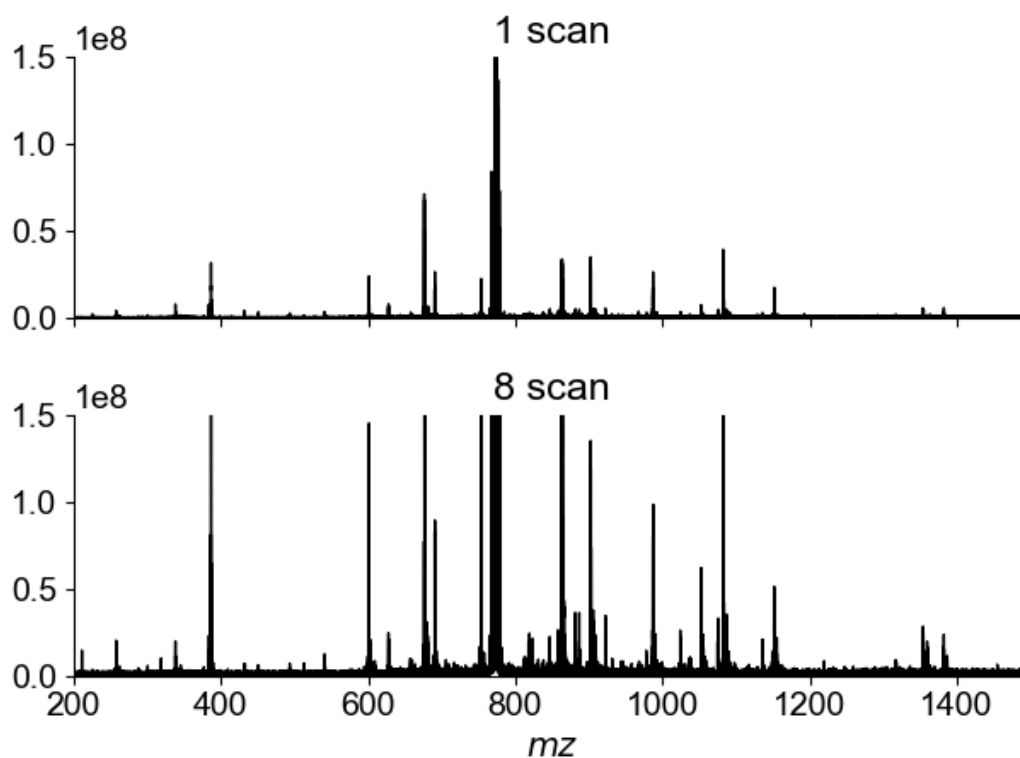

Supporting Figure S19A Extracted 2DUVPD-MS/MS fragments of  $[M-7H]^{7-}$  precursor without denoising of a single scan (top, ~460 peaks) and 8 scan accumulated (bottom, ~700 peaks).

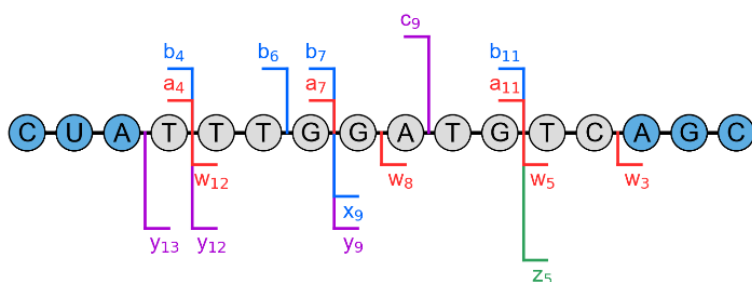

Supporting Figure S19B Cleavage diagram of the 2DUVPD-MS/MS fragments of  $[M-7H]^{7-}$  after a single scan with denoising.

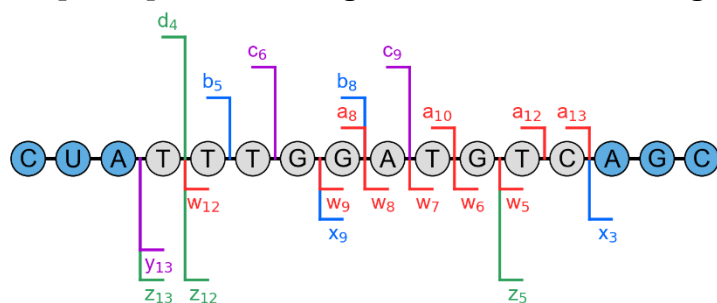

**Supporting Figure S19C Cleavage diagram of the 2DUVPD-MS/MS fragments of [M-7H]<sup>7-</sup> after 8 scan accumulated with denoising.**

## **Section 2: Simulation of 2DMS**

Expansion of Section 3.6 in the main text. Figures first show the x- and y- dimension of a 2DMS plot.

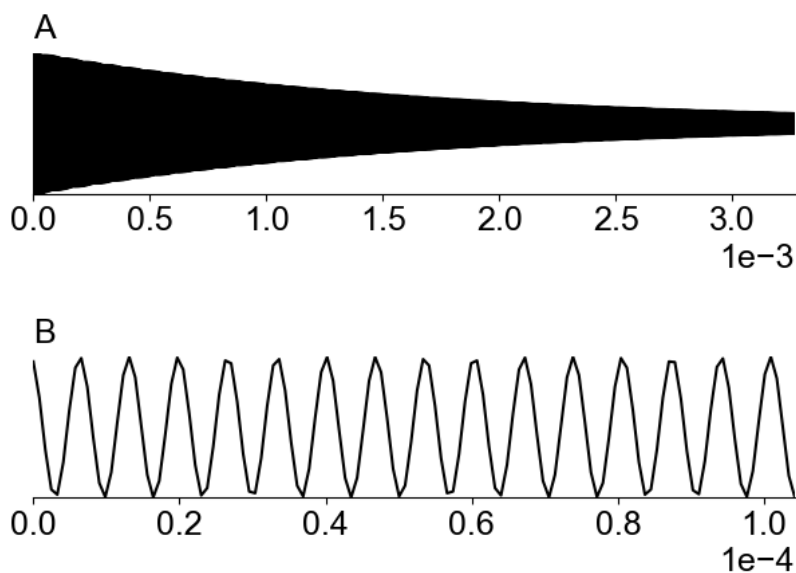

**Supporting Figure S20 An ideal transient would have a steady decay in the A) x-dimension, typical of a 1DMS. Transient in B) y-dimension would remain constant assuming the spray is consistent and there is no electrostatic buildup occurring within the source or ion optics.**

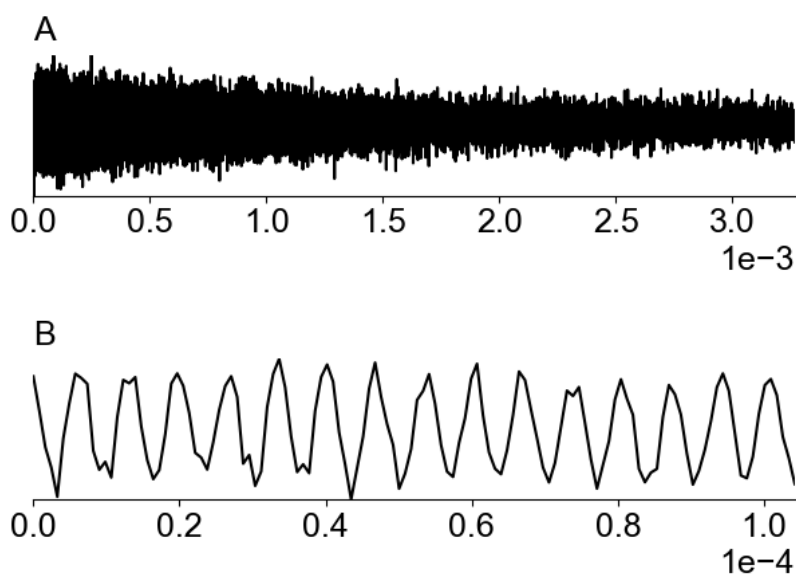

Supporting Figure S21 Transient in A) x-dimension and B) y-dimension with added noise (~ 20%), ideally there would be little to no noise.

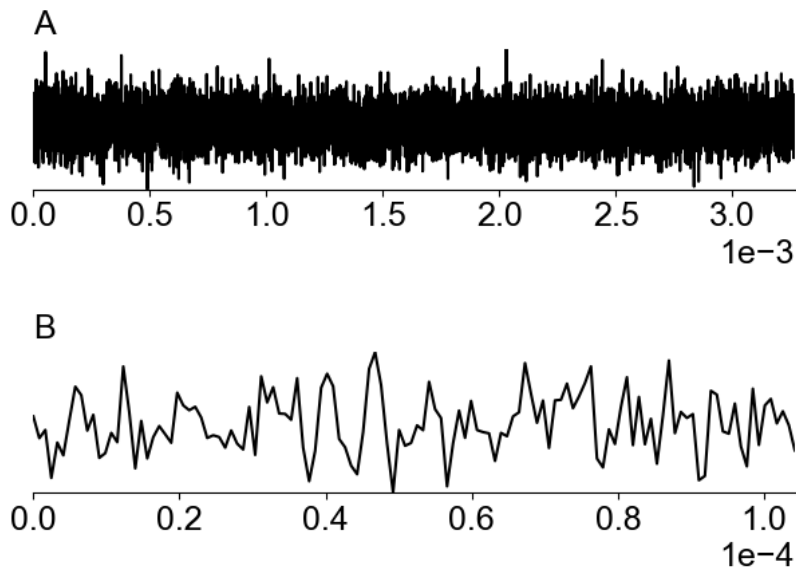

Supporting Figure S22 Transient in A) x-dimension and B) y-dimension with 8-fold increase in noise compared to Supporting Figure S22, emulating the spectra of low intensity peaks.

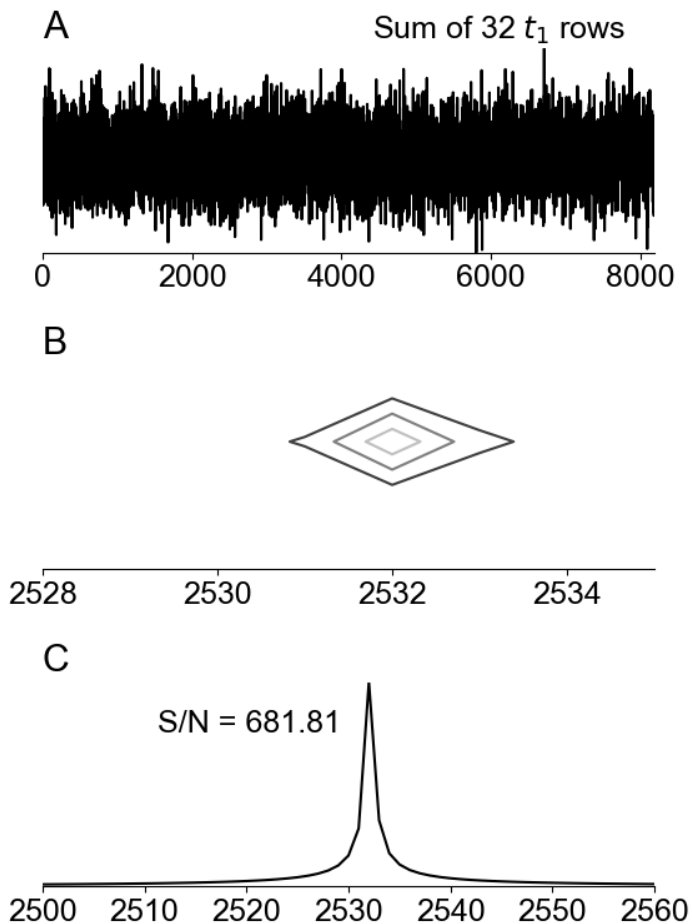

**Supporting Figure S23 A) Sum of transients generated from 2DMS (using noise threshold defined in Supporting Figure S23) and the B) Contour plot after 2DFFT, subsequent C) summation of Fourier Transformed spectra with the respective S/N calculation. Signal was determined by the maximum signal and noise adjacent to the peak was averaged.**

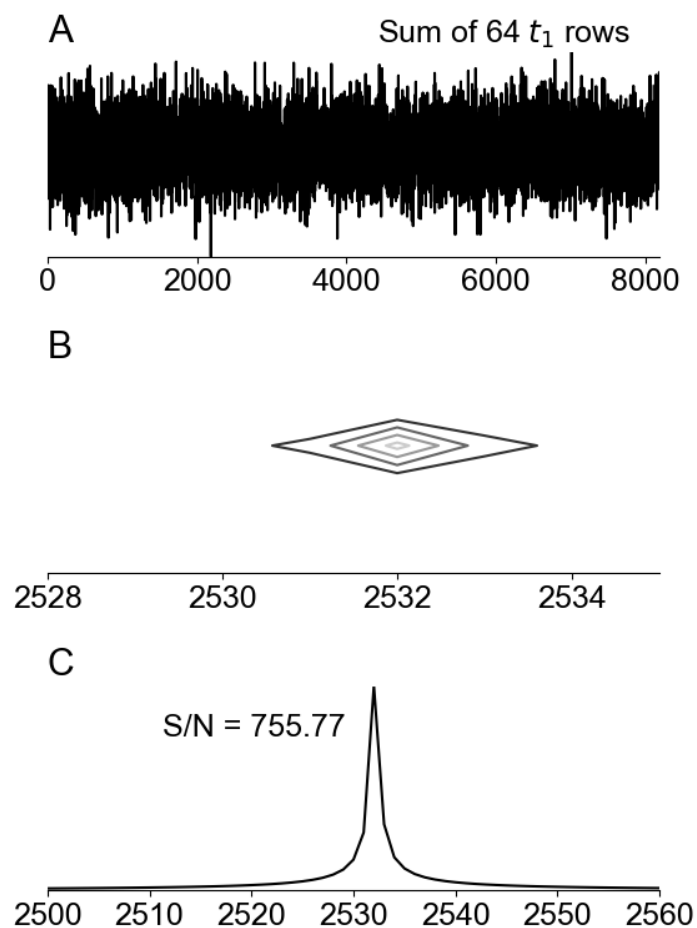

**Supporting Figure S24 Equivalent spectra as S24 but with twice the number of rows ( $N = 64$ )**

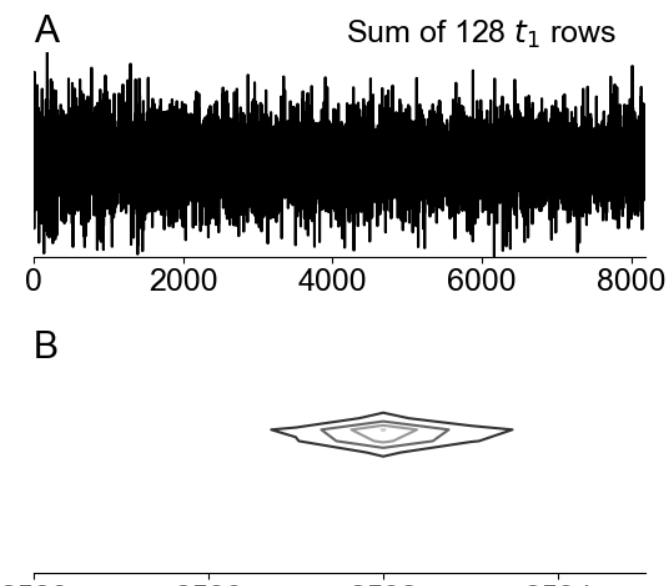

**Supporting Figure S25 Equivalent spectra as S24 but with four times the number of rows ( $N = 128$ )**

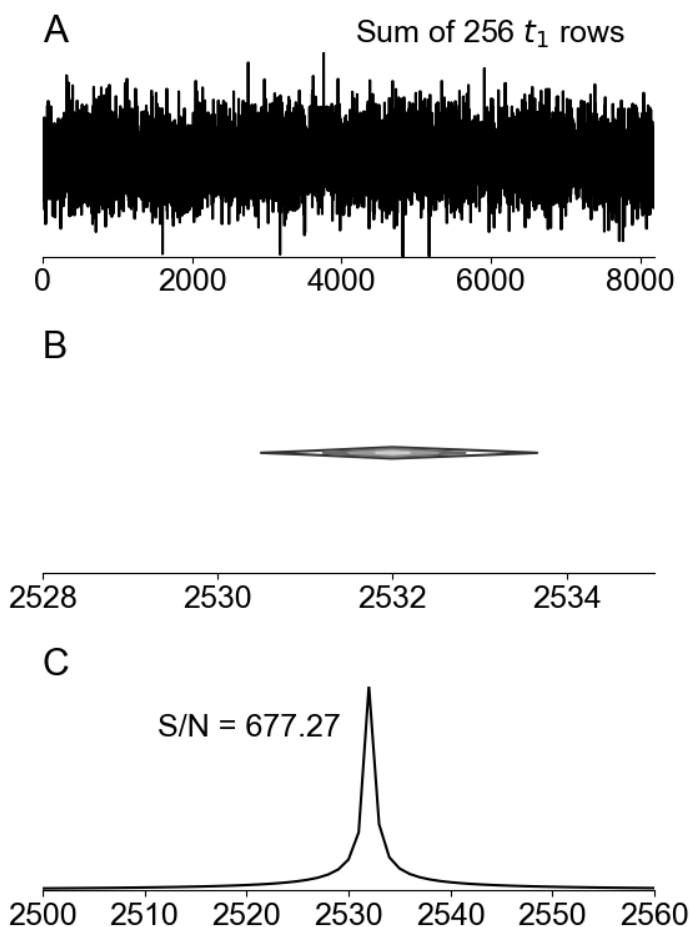

**Supporting Figure S26 Equivalent spectra as S24 but with eight times the number of rows ( $N = 256$ )**

By comparing the signal-to-noise ratio (SNR) between Supporting Figures S24 to S26, it demonstrates that acquiring more scan lines ( $t_1$  row) can improve the SNR. However, beyond a certain threshold, the SNR will reach a plateau where further increases in the number of scans will only result in the acquisition of more noise, which is observed in Supporting Figure S26. We therefore propose that taking multiple scans at the peak of SNR, and taking the average will lead to the greatest signal enhancement instead of acquiring more scan lines ( $t_1$  row). Python code for simulating 2DMS is shown in page S32.

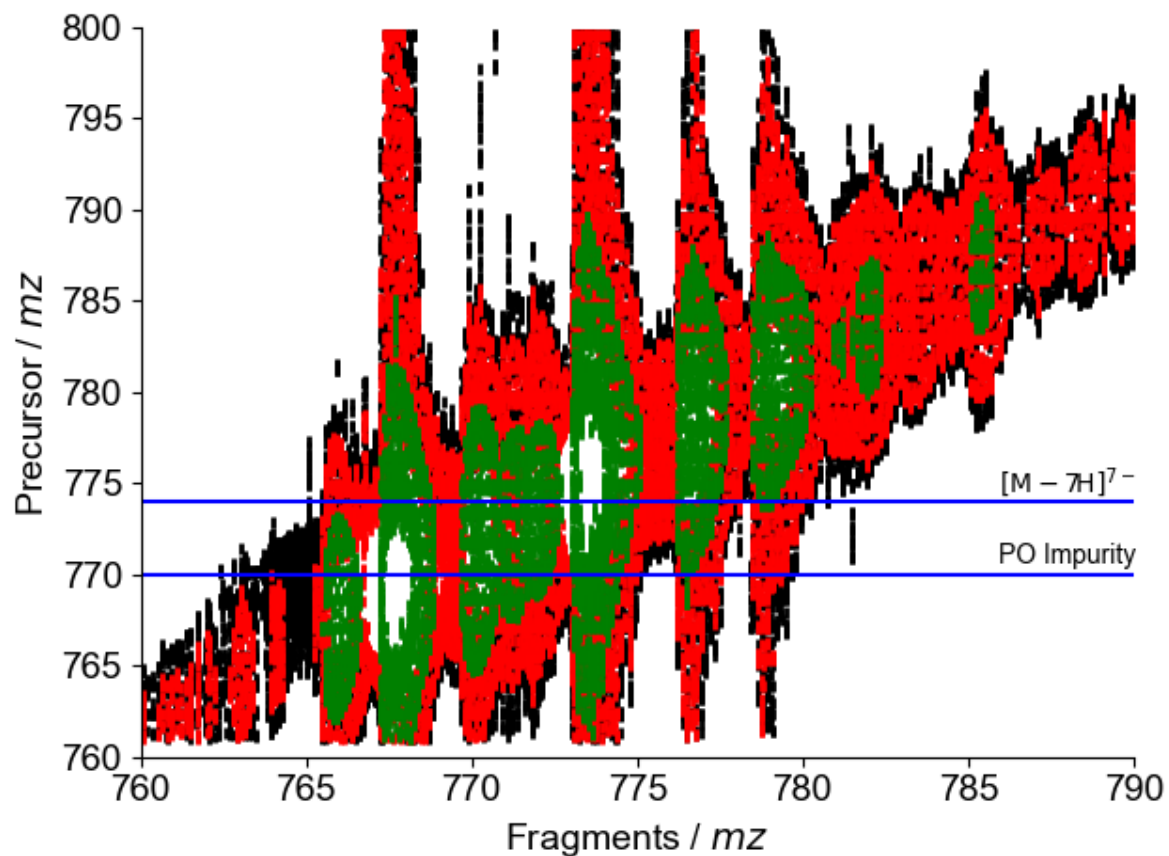

**Supporting Figure S27** Zoom region of 8 scan accumulated 2DMS of danvatirsen, the presence of two distinct precursors is evident, as indicated by the presence of two intense contours—one corresponding to the  $[M-7H]^{7-}$  precursor and the other to a PO impurity.



## Python code for simulation:

```
import numpy as np
import pandas as pd
import matplotlib.pyplot as plt
import sys

lowmass = 147
highmass = 1000
fidres = 8192 # 20=1m, 22=4m, 23=8m
noise_level = 0.2

lowmassy = 300
fidresy = 256

def mz_to_f(data, num_charge = 1):
    # data is freq or mass
    q = 1.60217662e-19 * num_charge
    B = 12 # 12T magnet
    mol = 6.0221409e+23 * 1000 #account for kg
    mz_fs = (q * B * mol) / (2 * np.pi * data)
    return mz_fs

def calculate_frequency_domain(nyq, number_data_points):
    #nyq rate freq * data points
    qntpoints = np.arange(0, (number_data_points))
    factor_distancy = (nyq) / (number_data_points)
    frequency_domain = qntpoints * factor_distancy
    return frequency_domain

nyq_rate = mz_to_f(lowmass) # get nyq rate
samp_rate = 2*nyq_rate # sampling rate is 2* nyq rate
transient_length = fidres/samp_rate #num data points / sampling rate =
transient length
nyq_ratey = mz_to_f(lowmassy) # get nyq rate
samp_ratey = 2*nyq_ratey # sampling rate is 2* nyq rate
transient_lengthy = fidresy/samp_ratey

sample_freq_622 = mz_to_f(622) #select a mass e.g. 622 and convert to
frequency
print(nyq_rate: %.2f\nfid len: %.2f\nsample freq: %.2f%(nyq_rate,
transient_length,sample_freq_622))
tx = np.linspace(0,transient_length,fidres) #x dimension
ty = np.linspace(0,transient_lengthy,fidresy) #y dimension

X,Y = np.meshgrid(tx,ty) #create 2D array of x and y data points

xdim = np.exp(1j * sample_freq_622 * np.pi * X) * np.exp(sample_freq_622*-X
* 0.002) # xdim and damping transient
ydim = np.exp(1j * sample_freq_622 * np.pi * Y) #ydim with no damping added
f = xdim*ydim

#Add noise in x and y dimension
f_noise = f + (np.random.normal(0,noise_level,size=np.shape(f))) #+ (1j *
np.random.normal(0,noise_level,size=np.shape(f)))

ft = np.fft.rfft2(f) # 2d fft take real spectrum
ft = np.fft.fftshift(ft) #reorder the fft data set so peaks are centered

fig, axes = plt.subplots(3, figsize=(6,8))
```

```

axes[0].plot(np.sum(f_noise,axis=0),c=k) #Sum all the rows and plot the FID
# Annotate the plot
axes[0].plot([],[], , label=Sum of %s $t_{1}$ rows%fidresy)
axes[0].set_title(A, loc=left)
axes[0].set_ylabel(Intensity)
axes[0].legend(frameon=False,loc=best, bbox_to_anchor=(0.2, 0.5, 0.8, 0.8))

data_points_x = len(ft[0])
ft = np.sqrt((np.power(ft.real, 2)) + (np.power(ft.imag, 2)))

#Plot 2D contour plot
axes[1].contour(ft,cmap=gray,levels=4)
axes[1].set_yticks(np.arange(0, 10+1, 2))
axes[1].set_ylim([int(fidresy)/1.8,int(fidresy)/1.5])
axes[1].set_xlim([2528,2535]) #select range to see peak
axes[1].set_title(B, loc=left)
axes[1].set_ylabel(Index / y)

ft1d = np.sum(ft[:, :], axis=0) #Sum all FTs
sig = np.max(ft1d) # select the max signal
noise = np.mean(ft1d[2000:2400]) # mean noise (magnitude mode) of noise
adjacent to signal

SN = sig/noise
print(Sig = %.2f \nNoise = %.2f\nSN=%.2f%(sig,noise,sig/noise))

# Plot the summated FTs
axes[2].plot(ft1d,c=k)
axes[2].plot([],[], , label=S/N = %.2f%(SN))
axes[2].set_xlim([2500,2560]) #adjust range to see peak
axes[2].legend(frameon=False)
axes[2].set_title(C, loc=left)
axes[2].set_ylabel(Intensity)

plt.show()

```

### Section 3: Code for generating oligonucleotide mass list.

Available at [https://github.com/MKRahman97/Oligonucleotide\\_mass\\_calculator](https://github.com/MKRahman97/Oligonucleotide_mass_calculator).

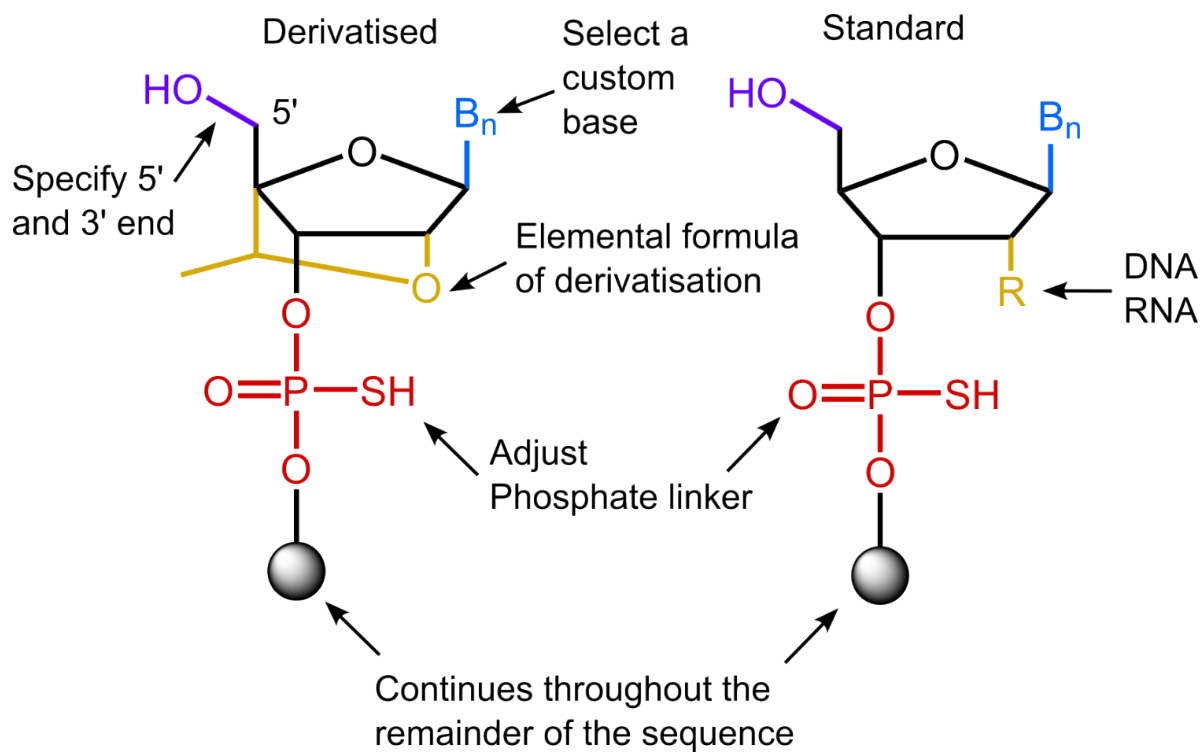

**Supporting Figure S27 Define the inputs for the oligonucleotide mass calculator by customising the elemental formula for the coloured regions.**

## Section 4: Tables of peak lists

Table S1 showing peak list, signal-to-noise ratio (S/N), elemental composition, and possible assignments with mass errors (ppm) of the [M-8H]<sup>8-</sup> MALAT-1 by EDD MS/MS, internal fragments marked by character (J), base losses are shown inside the parenthesis.

| Measured<br>mz | S/N  | Elemental<br>Composition                                         | Theoretical<br>mz | Error<br>(ppm) | Charge | Assignment                                                                                                                                                                                                                                                                                                                                                                                                                  |    |
|----------------|------|------------------------------------------------------------------|-------------------|----------------|--------|-----------------------------------------------------------------------------------------------------------------------------------------------------------------------------------------------------------------------------------------------------------------------------------------------------------------------------------------------------------------------------------------------------------------------------|----|
| 165.949499     | 27.7 |                                                                  |                   |                |        |                                                                                                                                                                                                                                                                                                                                                                                                                             |    |
| 317.024092     | 33.6 | C <sub>10</sub> H <sub>13</sub> N <sub>3</sub> O <sub>5</sub> PS | 317.024077        | -<br>0.048     | -1     | w11(mC)b6 -<br>H2O,<br>w4(mC)b13 -<br>H2O, x1 -<br>OCH2                                                                                                                                                                                                                                                                                                                                                                     | J1 |
| 319.015912     | 26.6 | C <sub>10</sub> H <sub>13</sub> N <sub>2</sub> O <sub>6</sub> PS | 319.015918        | 0.019          | -1     | x10(T)b7,<br>y10(T)c7,<br>z10(T)d7,<br>b5(T)x12,<br>x7(T)b10,<br>c5(T)y12,<br>a7(T)w10,<br>z7(T)d10,<br>d5(T)z12,<br>a5(T)w12,<br>b7(T)x10,<br>c7(T)y10,<br>d7(T)z10,<br>a10(T)w7,<br>b10(T)x7,<br>c10(T)y7,<br>d10(T)z7,<br>y7(T)c10,<br>d4(T)z13,<br>w7(T)a10,<br>z13(T)d4,<br>x12(T)b5,<br>c4(T)y13,<br>y12(T)c5,<br>w12(T)a5,<br>w13(T)a4,<br>y13(T)c4,<br>b4(T)x13,<br>x13(T)b4,<br>z12(T)d5,<br>w10(T)a7,<br>a4(T)w13 | J2 |
| 327.019667     | 35.9 | C <sub>10</sub> H <sub>11</sub> N <sub>5</sub> O <sub>4</sub> PS | 327.019661        | -<br>0.019     | -1     | w8(A)b9 - H2O,<br>x5a12, w9(A)b8<br>- H2O,<br>w6(A)b11 -<br>H2O                                                                                                                                                                                                                                                                                                                                                             | J3 |
| 328.027493     | 19.0 | C <sub>10</sub> H <sub>12</sub> N <sub>5</sub> O <sub>4</sub> PS | 328.027486        | -<br>0.021     | -1     | x5a12 + 1H,<br>a8(A)w9,<br>w9(A)a8,<br>x9(A)b8,<br>y9(A)c8,<br>z9(A)d8,<br>w8(A)a9,<br>y8(A)c9,<br>z8(A)d9,<br>w6(A)a11,<br>x6(A)b11,<br>y6(A)c11,<br>z6(A)d11,<br>b8(A)x9,<br>c12(G)z5,<br>c8(A)y9,<br>z5(G)c12,<br>d8(A)z9,<br>a9(A)w8,<br>b9(A)x8,<br>c9(A)y8,                                                                                                                                                           | J4 |

x8(A)b9,  
a11(A)w6,  
b11(A)x6,  
d9(A)z8,  
c11(A)y6,  
a12(G)x5,  
d11(A)z6

|            |         |                                                                                                   |            |       |    |                                  |  |  |
|------------|---------|---------------------------------------------------------------------------------------------------|------------|-------|----|----------------------------------|--|--|
| 332.406213 | 15.8    |                                                                                                   |            |       |    |                                  |  |  |
| 332.468783 | 34.4    |                                                                                                   |            |       |    |                                  |  |  |
| 356.904022 | 356.8   |                                                                                                   |            |       |    |                                  |  |  |
| 416.841796 | 23.1    |                                                                                                   |            |       |    |                                  |  |  |
| 418.904416 | 64.2    |                                                                                                   |            |       |    |                                  |  |  |
| 470.054137 | 16.8    | C <sub>16</sub> H <sub>18</sub> N <sub>5</sub> O <sub>8</sub> PS                                  | 470.054094 | -     | -1 | z2 - B(dC) - OCH2                |  |  |
|            |         |                                                                                                   |            | 0.092 |    |                                  |  |  |
| 521.043300 | 11.0    | C <sub>63</sub> H <sub>78</sub> N <sub>26</sub> O <sub>32</sub> P <sub>6</sub> S <sub>6</sub>     | 521.043359 | 0.114 | -4 | w6                               |  |  |
| 546.038427 | 16.4    |                                                                                                   |            |       |    |                                  |  |  |
| 577.374574 | 18.6    | C <sub>53</sub> H <sub>66</sub> N <sub>17</sub> O <sub>30</sub> P <sub>5</sub> S <sub>5</sub>     | 577.374495 | -     | -3 | d5                               |  |  |
|            |         |                                                                                                   |            | 0.138 |    |                                  |  |  |
| 585.381470 | 15.1    | C <sub>53</sub> H <sub>66</sub> N <sub>21</sub> O <sub>28</sub> P <sub>5</sub> S <sub>5</sub>     | 585.381984 | 0.879 | -3 | w5                               |  |  |
| 601.048682 | 25.7    | C <sub>73</sub> H <sub>91</sub> N <sub>28</sub> O <sub>38</sub> P <sub>7</sub> S <sub>7</sub>     | 601.049158 | 0.791 | -4 | w7                               |  |  |
| 631.422997 | 11.1    |                                                                                                   |            |       |    |                                  |  |  |
| 645.736608 | 26.0    | C <sub>63</sub> H <sub>77</sub> N <sub>20</sub> O <sub>32</sub> P <sub>5</sub> S <sub>5</sub>     | 645.736204 | -     | -3 | b6 - H2O, a6 - 2H                |  |  |
|            |         |                                                                                                   |            | 0.625 |    |                                  |  |  |
| 647.929731 | 33.2    | C <sub>166</sub> H <sub>214</sub> N <sub>60</sub> O <sub>84</sub> P <sub>15</sub> S <sub>15</sub> | 647.934574 | 7.475 | -8 | M - 8H2O                         |  |  |
| 654.923646 | 10.5    |                                                                                                   |            |       |    |                                  |  |  |
| 656.948065 | 11.8    |                                                                                                   |            |       |    |                                  |  |  |
| 661.064312 | 12.5    |                                                                                                   |            |       |    |                                  |  |  |
| 664.810898 | 11192.9 | C <sub>166</sub> H <sub>205</sub> N <sub>60</sub> O <sub>84</sub> P <sub>15</sub> S <sub>15</sub> | 664.811336 | 0.659 | -8 | M - 8H                           |  |  |
| 676.256998 | 24.0    | C <sub>103</sub> H <sub>128</sub> N <sub>40</sub> O <sub>52</sub> P <sub>10</sub> S <sub>10</sub> | 676.256415 | -     | -5 | w10                              |  |  |
|            |         |                                                                                                   |            | 0.862 |    |                                  |  |  |
| 683.307803 | 27.8    | C <sub>83</sub> H <sub>103</sub> N <sub>33</sub> O <sub>42</sub> P <sub>8</sub> S <sub>8</sub>    | 683.307848 | 0.066 | -4 | w8                               |  |  |
| 694.809922 | 24.6    | C <sub>88</sub> H <sub>109</sub> N <sub>27</sub> O <sub>46</sub> P <sub>8</sub> S <sub>8</sub>    | 694.809890 | -     | -4 | b9 - B(dG) - 2H, b9 - B(A) - H2O |  |  |
|            |         |                                                                                                   |            | 0.046 |    |                                  |  |  |
| 706.061335 | 52.9    | C <sub>43</sub> H <sub>54</sub> N <sub>16</sub> O <sub>23</sub> P <sub>4</sub> S <sub>4</sub>     | 706.061776 | 0.624 | -2 | w4                               |  |  |
| 712.468903 | 19.7    | C <sub>113</sub> H <sub>139</sub> N <sub>39</sub> O <sub>56</sub> P <sub>10</sub> S <sub>10</sub> | 712.468947 | 0.062 | -5 | b11 - H2O, a11 - 2H              |  |  |
| 721.483760 | 14.5    | C <sub>156</sub> H <sub>190</sub> N <sub>55</sub> O <sub>80</sub> P <sub>15</sub> S <sub>15</sub> | 721.483651 | -     | -7 | M - 7H - NH3 - 2T                |  |  |
|            |         |                                                                                                   |            | 0.151 |    |                                  |  |  |
| 728.573657 | 27.7    | C <sub>93</sub> H <sub>114</sub> N <sub>32</sub> O <sub>46</sub> P <sub>8</sub> S <sub>8</sub>    | 728.573513 | -     | -4 | b9 - H2O, a9 - 2H                |  |  |
|            |         |                                                                                                   |            | 0.198 |    |                                  |  |  |
| 737.061618 | 18.3    | C <sub>22</sub> H <sub>28</sub> N <sub>8</sub> O <sub>13</sub> P <sub>2</sub> S <sub>2</sub>      | 737.061973 | 0.482 | -1 | w2, d2                           |  |  |
| 740.492242 | 259.4   | C <sub>161</sub> H <sub>199</sub> N <sub>55</sub> O <sub>84</sub> P <sub>15</sub> S <sub>15</sub> | 740.490806 | -     | -7 | M - 7H - 4H - dA                 |  |  |
|            |         |                                                                                                   |            | 1.939 |    |                                  |  |  |
| 752.411054 | 34.9    | C <sub>73</sub> H <sub>90</sub> N <sub>22</sub> O <sub>38</sub> P <sub>6</sub> S <sub>6</sub>     | 752.410602 | -     | -3 | a7 - 2H, b7 - H2O                |  |  |
|            |         |                                                                                                   |            | 0.600 |    |                                  |  |  |
| 759.784631 | 150.7   | C <sub>166</sub> H <sub>204</sub> N <sub>60</sub> O <sub>84</sub> P <sub>15</sub> S <sub>15</sub> | 759.784305 | -     | -7 | M - 7H - 4H                      |  |  |
|            |         |                                                                                                   |            | 0.429 |    |                                  |  |  |
| 763.750269 | 24.6    | C <sub>73</sub> H <sub>88</sub> N <sub>28</sub> O <sub>35</sub> P <sub>6</sub> S <sub>6</sub>     | 763.749952 | -     | -3 | z7 - 2H, y7 - H2O                |  |  |
|            |         |                                                                                                   |            | 0.415 |    |                                  |  |  |
| 765.566883 | 5.2     | C <sub>93</sub> H <sub>115</sub> N <sub>38</sub> O <sub>46</sub> P <sub>9</sub> S <sub>9</sub>    | 765.566539 | -     | -4 | w9                               |  |  |
|            |         |                                                                                                   |            | 0.449 |    |                                  |  |  |
| 778.479254 | 10.3    |                                                                                                   |            |       |    |                                  |  |  |
| 781.274275 | 62.2    | C <sub>123</sub> H <sub>152</sub> N <sub>45</sub> O <sub>60</sub> P <sub>11</sub> S <sub>11</sub> | 781.278079 | 4.869 | -5 | z12 - 2H, y12 - H2O              |  |  |
| 801.733790 | 7.4     | C <sub>73</sub> H <sub>91</sub> N <sub>28</sub> O <sub>38</sub> P <sub>7</sub> S <sub>7</sub>     | 801.734636 | 1.055 | -3 | w7                               |  |  |
| 804.068697 | 7.8     | C <sub>123</sub> H <sub>155</sub> N <sub>45</sub> O <sub>63</sub> P <sub>12</sub> S <sub>12</sub> | 804.068889 | 0.239 | -5 | w12                              |  |  |
| 809.076385 | 23.7    |                                                                                                   |            |       |    |                                  |  |  |
| 817.083648 | 30.1    | C <sub>103</sub> H <sub>125</sub> N <sub>40</sub> O <sub>49</sub> P <sub>9</sub> S <sub>9</sub>   | 817.083825 | 0.216 | -4 | y10 - H2O, z10 - 2H              |  |  |
| 821.600305 | 8.7     | C <sub>53</sub> H <sub>63</sub> N <sub>21</sub> O <sub>25</sub> P <sub>4</sub> S <sub>4</sub>     | 821.599588 | -     | -2 | y5 - H2O, z5 - 2H                |  |  |
|            |         |                                                                                                   |            | 0.873 |    |                                  |  |  |
| 830.604948 | 14.2    | C <sub>53</sub> H <sub>65</sub> N <sub>21</sub> O <sub>26</sub> P <sub>4</sub> S <sub>4</sub>     | 830.604871 | -     | -2 | y5                               |  |  |
|            |         |                                                                                                   |            | 0.092 |    |                                  |  |  |

|             |      |                                          |             |       |    |                                          |  |
|-------------|------|------------------------------------------|-------------|-------|----|------------------------------------------|--|
| 842.733073  | 10.0 |                                          |             |       |    |                                          |  |
| 845.282848  | 14.2 | $C_{133}H_{165}N_{47}O_{66}P_{12}S_{12}$ | 845.282718  | -     | -5 | z13 - 2H, y13 - H2O, a13 - 2H, b13 - H2O |  |
|             |      |                                          |             | 0.154 |    |                                          |  |
| 861.752810  | 13.6 |                                          |             |       |    |                                          |  |
| 863.906735  | 7.5  | $C_{161}H_{198}N_{55}O_{84}P_{15}S_{15}$ | 863.905849  | -     | -6 | M - 8H - dA                              |  |
|             |      |                                          |             | 1.025 |    |                                          |  |
| 873.427857  | 15.8 | $C_{83}H_{100}N_{33}O_{39}P_7S_7$        | 873.428206  | 0.400 | -3 | z8 - 2H, y8 - H2O                        |  |
| 878.575916  | 11.4 | $C_{53}H_{66}N_{21}O_{28}P_5S_5$         | 878.576614  | 0.795 | -2 | w5                                       |  |
| 886.414777  | 24.6 | $C_{166}H_{203}N_{60}O_{84}P_{15}S_{15}$ | 886.414931  | 0.174 | -6 | M - 8H                                   |  |
| 896.843821  | 5.5  | $C_{113}H_{139}N_{43}O_{54}P_{10}S_{10}$ | 896.843619  | -     | -4 | y11 - H2O, z11 - 2H                      |  |
|             |      |                                          |             | 0.225 |    |                                          |  |
| 911.414020  | 8.6  | $C_{83}H_{103}N_{33}O_{42}P_8S_8$        | 911.412890  | -     | -3 | w8                                       |  |
|             |      |                                          |             | 1.240 |    |                                          |  |
| 925.582584  | 13.4 | $C_{113}H_{143}N_{43}O_{57}P_{11}S_{11}$ | 925.584089  | 1.626 | -4 | w11 + 1H                                 |  |
| 926.747840  | 23.1 | $C_{88}H_{109}N_{27}O_{46}P_8S_8$        | 926.748945  | 1.193 | -3 | b9 - B(A) - H2O, b9 - B(dG) - 2H         |  |
| 968.603923  | 28.3 |                                          |             |       |    |                                          |  |
| 971.430996  | 26.1 |                                          |             |       |    |                                          |  |
| 976.843282  | 10.1 |                                          |             |       |    |                                          |  |
| 983.105775  | 15.1 | $C_{93}H_{112}N_{38}O_{43}P_8S_8$        | 983.106460  | 0.696 | -3 | z9 - 2H, y9 - H2O                        |  |
| 1021.425317 | 12.6 | $C_{93}H_{116}N_{38}O_{46}P_9S_9$        | 1021.427086 | 1.732 | -3 | w9 + 1H                                  |  |
| 1043.094482 | 6.9  | $C_{63}H_{78}N_{26}O_{32}P_6S_6$         | 1043.093995 | -     | -2 | w6                                       |  |
|             |      |                                          |             | 0.467 |    |                                          |  |
| 1094.091304 | 12.2 | $C_{33}H_{40}N_{13}O_{18}P_3S_3$         | 1094.091650 | 0.317 | -1 | w3, d3                                   |  |
| 1129.117194 | 9.9  |                                          |             |       |    |                                          |  |
|             |      |                                          | Abs mean    | 0.710 |    |                                          |  |
|             |      |                                          | error       |       |    |                                          |  |
|             |      |                                          | Abs mean    | 0.898 |    |                                          |  |
|             |      |                                          | std dev     |       |    |                                          |  |

**Table S2 showing peak list, signal-to-noise ratio (S/N), elemental composition, and possible assignments with mass errors (ppm) of the [M-8H]<sup>8-</sup> MALAT-1 by CID MS/MS, internal fragments marked by character (J), base losses are shown inside the parenthesis.**

| Measured <i>mz</i> | S/N   | Elemental Composition                                            | Theoretical <i>mz</i> | Error (ppm) | Charge | Assignment                                                                                                                                                                                                                                                                                                                                                                                                                  |        |
|--------------------|-------|------------------------------------------------------------------|-----------------------|-------------|--------|-----------------------------------------------------------------------------------------------------------------------------------------------------------------------------------------------------------------------------------------------------------------------------------------------------------------------------------------------------------------------------------------------------------------------------|--------|
| 319.015918         | 231.5 | C <sub>10</sub> H <sub>13</sub> N <sub>2</sub> O <sub>6</sub> PS | 319.015918            | 0.000       | -1     | x10(T)b7,<br>y10(T)c7,<br>z10(T)d7,<br>b5(T)x12,<br>x7(T)b10,<br>c5(T)y12,<br>a7(T)w10,<br>z7(T)d10,<br>d5(T)z12,<br>a5(T)w12,<br>b7(T)x10,<br>c7(T)y10,<br>d7(T)z10,<br>a10(T)w7,<br>b10(T)x7,<br>c10(T)y7,<br>d10(T)z7,<br>y7(T)c10,<br>d4(T)z13,<br>w7(T)a10,<br>z13(T)d4,<br>x12(T)b5,<br>c4(T)y13,<br>y12(T)c5,<br>w12(T)a5,<br>w13(T)a4,<br>y13(T)c4,<br>b4(T)x13,<br>x13(T)b4,<br>z12(T)d5,<br>w10(T)a7,<br>a4(T)w13 | J<br>1 |
| 328.027433         | 81.8  | C <sub>10</sub> H <sub>12</sub> N <sub>5</sub> O <sub>4</sub> PS | 328.027486            | 0.163       | -1     | x5a12 + 1H,<br>a8(A)w9,<br>w9(A)a8,<br>x9(A)b8,<br>y9(A)c8,<br>z9(A)d8,<br>w8(A)a9,<br>y8(A)c9,<br>z8(A)d9,<br>w6(A)a11,<br>x6(A)b11,<br>y6(A)c11,<br>z6(A)d11,<br>b8(A)x9,<br>c12(G)z5,<br>c8(A)y9,<br>z5(G)c12,<br>d8(A)z9,<br>a9(A)w8,<br>b9(A)x8,<br>c9(A)y8,<br>x8(A)b9,<br>a11(A)w6,<br>b11(A)x6,<br>d9(A)z8,<br>c11(A)y6,<br>a12(G)x5,<br>d11(A)z6                                                                   | J<br>2 |
| 337.026466         | 41.6  | C <sub>10</sub> H <sub>15</sub> N <sub>2</sub> O <sub>7</sub> PS | 337.026483            | 0.050       | -1     | y13(T)d4 + 2H,<br>y12(T)d5 + 2H,<br>y10(T)d7 + 2H,<br>y7(T)d10 + 2H,<br>b4(T)w13 + 2H,                                                                                                                                                                                                                                                                                                                                      | J<br>3 |

|            |        |                                  |            |       |    |                                                                                                                                                                                                                                                                                                                                                                                                                         |        |
|------------|--------|----------------------------------|------------|-------|----|-------------------------------------------------------------------------------------------------------------------------------------------------------------------------------------------------------------------------------------------------------------------------------------------------------------------------------------------------------------------------------------------------------------------------|--------|
| 344.022387 | 48.4   | $C_{10}H_{12}N_5O_5PS$           | 344.022400 | 0.037 | -1 | w12(T)b5 + 1H,<br>b5(T)w12 + 2H,<br>b7(T)w10 + 2H,<br>d7(T)y10 + 2H,<br>d10(T)y7 + 2H,<br>b10(T)w7 + 2H,<br>w7(T)b10 + 1H,<br>w13(T)b4 + 1H,<br>w10(T)b7 + 1H,<br>d4(T)y13 + 2H,<br>d5(T)y12 + 2H<br>d12(G)z5,<br>x5(G)b12,<br>y5(G)c12,<br>w5(G)a12,<br>y6(A)d11,<br>z5(G)d12,<br>b8(A)w9,<br>y9(A)d8,<br>d8(A)y9,<br>c12(G)y5,<br>b9(A)w8,<br>d9(A)y8,<br>b12(G)x5,<br>a12(G)w5,<br>y8(A)d9,<br>b11(A)w6,<br>d11(A)y6 | J<br>4 |
| 346.026698 | 39.2   | $C_{11}H_{14}N_3O_6PS$           | 346.026817 | 0.345 | -1 | z15(dC)d2,<br>d2(dC)z15,<br>c2(dC)y15,<br>b2(dC)x15,<br>a2(dC)w15,<br>w15(dC)a2,<br>x15(dC)b2, w1<br>- H2O,<br>y15(dC)c2                                                                                                                                                                                                                                                                                                | J<br>5 |
| 352.984562 | 163.8  | $C_{11}H_{12}N_5O_5PS$           | 356.022400 | 0.303 | -1 | b14(dA)x3,<br>z3(dA)d14,<br>d3(dA)z14,<br>w14(dA)a3,<br>a14(dA)w3,<br>c14(dA)y3,<br>y3(dA)c14,<br>x3(dA)b14,<br>x2a15 + 1H,<br>c3(dA)y14,<br>a15(dG)x2,<br>b3(dA)x14,<br>z2(dG)c15,<br>a3(dA)w14,<br>c15(dG)z2,<br>x14(dA)b3,<br>y14(dA)c3,<br>z14(dA)d3,<br>w3(dA)a14,<br>d14(dA)z3                                                                                                                                    | J<br>6 |
| 356.022292 | 336.9  |                                  | d3, w3     |       |    |                                                                                                                                                                                                                                                                                                                                                                                                                         |        |
| 364.025674 | 64.3   | $C_{33}H_{40}N_{13}O_{18}P_3S_3$ | 364.025699 | 0.070 | -3 | w2, d2                                                                                                                                                                                                                                                                                                                                                                                                                  |        |
| 368.027117 | 1926.7 | $C_{22}H_{28}N_8O_{13}P_2S_2$    | 368.027348 | 0.628 | -2 | a5 - B(T) - H2O                                                                                                                                                                                                                                                                                                                                                                                                         |        |
| 368.528995 | 254.0  | $C_{48}H_{56}N_{15}O_{24}P_4S_4$ | 368.529122 | 0.344 | -4 | d15(dG)y2 +<br>2H, w2b15 +<br>1H, y2d15 +<br>2H, b15(dG)w2<br>+ 2H, d1                                                                                                                                                                                                                                                                                                                                                  | J<br>7 |
| 371.493430 | 138.2  |                                  |            |       |    |                                                                                                                                                                                                                                                                                                                                                                                                                         |        |
| 390.027761 | 88.7   | $C_{11}H_{14}N_5O_7PS$           | 390.027880 | 0.305 | -1 | x12(T)d5 + 1H,<br>x13(T)d4 + 1H,<br>d10(T)x7,<br>c10(T)w7,<br>c7(T)w10,                                                                                                                                                                                                                                                                                                                                                 | J<br>8 |
| 398.982293 | 24.7   | $C_{10}H_{14}N_2O_8P_2S_2$       | 414.959405 | -     | -1 |                                                                                                                                                                                                                                                                                                                                                                                                                         |        |
| 414.959406 | 131.5  |                                  |            | 0.001 |    |                                                                                                                                                                                                                                                                                                                                                                                                                         |        |



|            |            |                                                                                                   |            |       |    |                                         |                                                                                                                                                      |
|------------|------------|---------------------------------------------------------------------------------------------------|------------|-------|----|-----------------------------------------|------------------------------------------------------------------------------------------------------------------------------------------------------|
|            |            |                                                                                                   |            |       |    |                                         | d7(T)x10,<br>x10(T)d7 + 1H,<br>d5(T)x12,<br>c5(T)w12,<br>x7(T)d10 + 1H,<br>w13(T)c4,<br>w12(T)c5,<br>d4(T)x13,<br>w10(T)c7,<br>c4(T)w13,<br>w7(T)c10 |
| 417.052764 | 114.1      |                                                                                                   |            |       |    |                                         |                                                                                                                                                      |
| 420.511784 | 605.3      |                                                                                                   |            |       |    |                                         |                                                                                                                                                      |
| 421.013507 | 99.0       |                                                                                                   |            |       |    |                                         |                                                                                                                                                      |
| 426.064272 | 43.2       |                                                                                                   |            |       |    |                                         |                                                                                                                                                      |
| 438.784921 | 62.2       | C <sub>53</sub> H <sub>66</sub> N <sub>21</sub> O <sub>28</sub> P <sub>5</sub> S <sub>5</sub>     | 438.784669 | -     | -4 | w5                                      |                                                                                                                                                      |
|            |            |                                                                                                   |            | 0.573 |    |                                         |                                                                                                                                                      |
| 453.626744 | 13.5       | C <sub>68</sub> H <sub>86</sub> N <sub>23</sub> O <sub>38</sub> P <sub>7</sub> S <sub>7</sub>     | 453.626972 | 0.503 | -5 | w7 - B(dA)                              |                                                                                                                                                      |
| 470.054300 | 11.4       | C <sub>16</sub> H <sub>18</sub> N <sub>5</sub> O <sub>8</sub> PS                                  | 470.054094 | -     | -1 | z2 - B(dC) -<br>OCH2                    |                                                                                                                                                      |
|            |            |                                                                                                   |            | 0.439 |    |                                         |                                                                                                                                                      |
| 479.008386 | 45.6       |                                                                                                   |            |       |    |                                         |                                                                                                                                                      |
| 480.638072 | 70.5       | C <sub>73</sub> H <sub>91</sub> N <sub>28</sub> O <sub>38</sub> P <sub>7</sub> S <sub>7</sub>     | 480.637871 | -     | -5 | w7                                      |                                                                                                                                                      |
|            |            |                                                                                                   |            | 0.417 |    |                                         |                                                                                                                                                      |
| 487.280148 | 19.9       | C <sub>58</sub> H <sub>73</sub> N <sub>21</sub> O <sub>32</sub> P <sub>6</sub> S <sub>6</sub>     | 487.279736 | -     | -4 | w6 - B(dA)                              |                                                                                                                                                      |
|            |            |                                                                                                   |            | 0.847 |    |                                         |                                                                                                                                                      |
| 494.985659 | 99.6       |                                                                                                   |            |       |    |                                         |                                                                                                                                                      |
| 498.570125 | 140.2      | C <sub>33</sub> H <sub>39</sub> N <sub>13</sub> O <sub>16</sub> P <sub>2</sub> S <sub>2</sub>     | 498.570443 | 0.638 | -2 | b3, y3                                  |                                                                                                                                                      |
| 503.997015 | 56.8       |                                                                                                   |            |       |    |                                         |                                                                                                                                                      |
| 512.539187 | 28.9       | C <sub>63</sub> H <sub>80</sub> N <sub>20</sub> O <sub>35</sub> P <sub>6</sub> S <sub>6</sub>     | 512.538847 | -     | -4 | d6                                      |                                                                                                                                                      |
|            |            |                                                                                                   |            | 0.663 |    |                                         |                                                                                                                                                      |
| 513.999498 | 283.0      |                                                                                                   |            |       |    |                                         |                                                                                                                                                      |
| 519.434148 | 25.1       | C <sub>78</sub> H <sub>98</sub> N <sub>28</sub> O <sub>42</sub> P <sub>8</sub> S <sub>8</sub>     | 519.433924 | -     | -5 | w8 - B(A)                               |                                                                                                                                                      |
|            |            |                                                                                                   |            | 0.431 |    |                                         |                                                                                                                                                      |
| 521.042959 | 74.7       | C <sub>63</sub> H <sub>78</sub> N <sub>26</sub> O <sub>32</sub> P <sub>6</sub> S <sub>6</sub>     | 521.043359 | 0.767 | -4 | w6                                      |                                                                                                                                                      |
| 535.032067 | 29.4       | C <sub>48</sub> H <sub>61</sub> N <sub>16</sub> O <sub>27</sub> P <sub>5</sub> S <sub>5</sub>     | 535.032181 | 0.214 | -3 | x5 - B(dA) +<br>1H, w5 - B(dG)          |                                                                                                                                                      |
|            |            |                                                                                                   |            |       |    | w3 - H2O, d3 -<br>H2O                   |                                                                                                                                                      |
| 537.536547 | 12.1       | C <sub>33</sub> H <sub>38</sub> N <sub>13</sub> O <sub>17</sub> P <sub>3</sub> S <sub>3</sub>     | 537.536904 | 0.665 | -2 |                                         |                                                                                                                                                      |
| 545.055150 | 31.2       |                                                                                                   |            |       |    |                                         |                                                                                                                                                      |
| 545.393193 | 73.2       | C <sub>53</sub> H <sub>65</sub> N <sub>17</sub> O <sub>28</sub> P <sub>4</sub> S <sub>4</sub>     | 545.393333 | 0.257 | -3 | b5                                      |                                                                                                                                                      |
| 546.542130 | 55.3       | C <sub>33</sub> H <sub>40</sub> N <sub>13</sub> O <sub>18</sub> P <sub>3</sub> S <sub>3</sub>     | 546.542187 | 0.104 | -2 | w3, d3                                  |                                                                                                                                                      |
| 553.400379 | 270.0      | C <sub>53</sub> H <sub>65</sub> N <sub>21</sub> O <sub>26</sub> P <sub>4</sub> S <sub>4</sub>     | 553.400822 | 0.801 | -3 | y5                                      |                                                                                                                                                      |
| 558.431030 | 27.5       |                                                                                                   |            |       |    |                                         |                                                                                                                                                      |
| 563.291658 | 22.3       |                                                                                                   |            |       |    |                                         |                                                                                                                                                      |
| 567.284655 | 1117.<br>4 | C <sub>68</sub> H <sub>86</sub> N <sub>23</sub> O <sub>38</sub> P <sub>7</sub> S <sub>7</sub>     | 567.285534 | 1.550 | -4 | w7 - B(dA)                              |                                                                                                                                                      |
| 577.063475 | 7.3        | C <sub>73</sub> H <sub>90</sub> N <sub>28</sub> O <sub>36</sub> P <sub>6</sub> S <sub>6</sub>     | 577.063286 | -     | -4 | y7                                      |                                                                                                                                                      |
|            |            |                                                                                                   |            | 0.328 |    |                                         |                                                                                                                                                      |
| 579.378084 | 15.4       | C <sub>53</sub> H <sub>64</sub> N <sub>21</sub> O <sub>27</sub> P <sub>5</sub> S <sub>5</sub>     | 579.378462 | 0.653 | -3 | w5 - H2O                                |                                                                                                                                                      |
| 585.381229 | 743.9      | C <sub>53</sub> H <sub>66</sub> N <sub>21</sub> O <sub>28</sub> P <sub>5</sub> S <sub>5</sub>     | 585.381984 | 1.289 | -3 | w5                                      |                                                                                                                                                      |
| 594.044080 | 10.2       | C <sub>108</sub> H <sub>137</sub> N <sub>38</sub> O <sub>57</sub> P <sub>11</sub> S <sub>11</sub> | 594.043247 | -     | -6 | w11 - B(A)                              |                                                                                                                                                      |
|            |            |                                                                                                   |            | 1.402 |    |                                         |                                                                                                                                                      |
| 601.048363 | 647.3      | C <sub>73</sub> H <sub>91</sub> N <sub>28</sub> O <sub>38</sub> P <sub>7</sub> S <sub>7</sub>     | 601.049158 | 1.323 | -4 | w7                                      |                                                                                                                                                      |
| 604.050724 | 23.8       | C <sub>58</sub> H <sub>70</sub> N <sub>17</sub> O <sub>31</sub> P <sub>5</sub> S <sub>5</sub>     | 604.049900 | -     | -3 | b6 - B(mC) -<br>H2O, b6 - B(T)<br>- NH3 |                                                                                                                                                      |
|            |            |                                                                                                   |            | 1.364 |    | b8 - B(A) -<br>H2O, b8 -<br>B(dG) - 2H  |                                                                                                                                                      |
| 612.551382 | 25.2       | C <sub>78</sub> H <sub>97</sub> N <sub>22</sub> O <sub>42</sub> P <sub>7</sub> S <sub>7</sub>     | 612.551199 | -     | -4 | w11                                     |                                                                                                                                                      |
|            |            |                                                                                                   |            | 0.298 |    |                                         |                                                                                                                                                      |
| 616.552784 | 5.3        | C <sub>113</sub> H <sub>142</sub> N <sub>43</sub> O <sub>57</sub> P <sub>11</sub> S <sub>11</sub> | 616.552329 | -     | -6 |                                         |                                                                                                                                                      |
|            |            |                                                                                                   |            | 0.738 |    |                                         |                                                                                                                                                      |
| 618.060884 | 14.2       | C <sub>58</sub> H <sub>72</sub> N <sub>21</sub> O <sub>30</sub> P <sub>5</sub> S <sub>5</sub>     | 618.060910 | 0.042 | -3 | y6 - B(dA)                              |                                                                                                                                                      |
| 623.254115 | 5.7        | C <sub>98</sub> H <sub>124</sub> N <sub>29</sub> O <sub>53</sub> P <sub>9</sub> S <sub>9</sub>    | 623.253208 | -     | -5 | b10 - B(A)                              |                                                                                                                                                      |
|            |            |                                                                                                   |            | 1.456 |    |                                         |                                                                                                                                                      |

|            |        |                                                                                                  |            |       |    |                                                 |
|------------|--------|--------------------------------------------------------------------------------------------------|------------|-------|----|-------------------------------------------------|
| 625.558645 | 12.3   | C <sub>78</sub> H <sub>97</sub> N <sub>28</sub> O <sub>40</sub> P <sub>7</sub> S <sub>7</sub>    | 625.558353 | -     | -4 | y8 - B(A)                                       |
|            |        |                                                                                                  |            | 0.467 |    |                                                 |
| 631.046723 | 862.7  | C <sub>155</sub> H <sub>189</sub> N <sub>57</sub> O <sub>79</sub> P <sub>15</sub> S <sub>1</sub> | 631.047711 | 1.565 | -8 | c15 - 2H                                        |
|            |        |                                                                                                  |            |       |    |                                                 |
| 631.547134 | 16.0   | C <sub>38</sub> H <sub>51</sub> N <sub>11</sub> O <sub>22</sub> P <sub>4</sub> S <sub>4</sub>    | 631.544896 | -     | -2 | w4 - B(dG) + 2H                                 |
|            |        |                                                                                                  |            | 3.544 |    |                                                 |
| 641.117889 | 137.6  | C <sub>22</sub> H <sub>27</sub> N <sub>8</sub> O <sub>11</sub> PS                                | 641.118485 | 0.930 | -1 | b2, y2                                          |
| 646.934278 | 20.8   |                                                                                                  |            |       |    |                                                 |
| 647.929370 | 923.4  | C <sub>166</sub> H <sub>214</sub> N <sub>60</sub> O <sub>84</sub> P <sub>15</sub> S <sub>1</sub> | 647.934574 | 8.030 |    | M - 8H <sub>2</sub> O                           |
|            |        |                                                                                                  |            |       |    |                                                 |
| 649.544672 | 29.5   | C <sub>78</sub> H <sub>98</sub> N <sub>28</sub> O <sub>42</sub> P <sub>8</sub> S <sub>8</sub>    | 649.544225 | -     | -4 | w8 - B(A)                                       |
|            |        |                                                                                                  |            | 0.688 |    |                                                 |
| 658.085694 | 74.2   |                                                                                                  |            |       |    |                                                 |
| 658.090197 | 143.5  | C <sub>43</sub> H <sub>53</sub> N <sub>16</sub> O <sub>21</sub> P <sub>3</sub> S <sub>3</sub>    | 658.090032 | -     | -2 | y4                                              |
|            |        |                                                                                                  |            | 0.251 |    |                                                 |
| 659.322365 | 27.1   | C <sub>83</sub> H <sub>102</sub> N <sub>33</sub> O <sub>40</sub> P <sub>7</sub> S <sub>7</sub>   | 659.321977 | -     | -4 | y8                                              |
|            |        |                                                                                                  |            | 0.589 |    |                                                 |
| 663.079559 | 39.3   | C <sub>63</sub> H <sub>77</sub> N <sub>26</sub> O <sub>30</sub> P <sub>5</sub> S <sub>5</sub>    | 663.079076 | -     | -3 | y6                                              |
|            |        |                                                                                                  |            | 0.729 |    |                                                 |
| 663.748775 | 8.0    | C <sub>63</sub> H <sub>79</sub> N <sub>26</sub> O <sub>30</sub> P <sub>5</sub> S <sub>5</sub>    | 663.750959 | 3.291 | -3 | y6 + 2H                                         |
| 664.809983 | 1777.2 | C <sub>166</sub> H <sub>205</sub> N <sub>60</sub> O <sub>84</sub> P <sub>15</sub> S <sub>1</sub> | 664.811336 | 2.036 | -8 | M - 8H                                          |
|            |        |                                                                                                  |            |       |    |                                                 |
| 665.850084 | 46.5   | C <sub>103</sub> H <sub>128</sub> N <sub>34</sub> O <sub>54</sub> P <sub>10</sub> S <sub>1</sub> | 665.850692 | 0.912 | -5 | d10 - H <sub>2</sub> O                          |
|            |        |                                                                                                  |            |       |    |                                                 |
| 670.050543 | 8.6    | C <sub>83</sub> H <sub>102</sub> N <sub>27</sub> O <sub>44</sub> P <sub>8</sub> S <sub>8</sub>   | 670.048739 | -     | -4 | c8 - 2H                                         |
|            |        |                                                                                                  |            | 2.692 |    |                                                 |
| 670.301131 | 47.1   | C <sub>83</sub> H <sub>103</sub> N <sub>27</sub> O <sub>44</sub> P <sub>8</sub> S <sub>8</sub>   | 670.300695 | -     | -4 | d8 - H <sub>2</sub> O                           |
|            |        |                                                                                                  |            | 0.651 |    |                                                 |
| 677.717028 | 14.8   | C <sub>63</sub> H <sub>78</sub> N <sub>20</sub> O <sub>34</sub> P <sub>6</sub> S <sub>6</sub>    | 677.717366 | 0.499 | -3 | d6 - H <sub>2</sub> O                           |
| 678.805739 | 8.6    | C <sub>83</sub> H <sub>101</sub> N <sub>33</sub> O <sub>41</sub> P <sub>8</sub> S <sub>8</sub>   | 678.805207 | -     | -4 | w8 - H <sub>2</sub> O                           |
|            |        |                                                                                                  |            | 0.784 |    |                                                 |
| 683.807106 | 20.3   |                                                                                                  |            |       |    |                                                 |
| 683.809895 | 33.2   |                                                                                                  |            |       |    |                                                 |
| 685.458357 | 154.9  | C <sub>108</sub> H <sub>134</sub> N <sub>34</sub> O <sub>56</sub> P <sub>10</sub> S <sub>1</sub> | 685.458048 | -     | -5 | b11 - B(dG) - 2H, b11 - B(A) - H <sub>2</sub> O |
|            |        |                                                                                                  |            | 0.450 |    | w6 - H <sub>2</sub> O                           |
| 689.057419 | 14.9   | C <sub>63</sub> H <sub>76</sub> N <sub>26</sub> O <sub>31</sub> P <sub>6</sub> S <sub>6</sub>    | 689.056716 | -     | -3 |                                                 |
|            |        |                                                                                                  |            | 1.021 |    |                                                 |
| 694.809383 | 1615.6 | C <sub>88</sub> H <sub>109</sub> N <sub>27</sub> O <sub>46</sub> P <sub>8</sub> S <sub>8</sub>   | 694.809890 | 0.729 | -4 | b9 - B(dG) - 2H, b9 - B(A) - H <sub>2</sub> O   |
|            |        |                                                                                                  |            |       |    | w4 - H <sub>2</sub> O                           |
| 697.056953 | 32.6   | C <sub>43</sub> H <sub>52</sub> N <sub>16</sub> O <sub>22</sub> P <sub>4</sub> S <sub>4</sub>    | 697.056494 | -     | -2 |                                                 |
|            |        |                                                                                                  |            | 0.658 |    |                                                 |
| 697.549218 | 18.1   | C <sub>43</sub> H <sub>51</sub> N <sub>15</sub> O <sub>23</sub> P <sub>4</sub> S <sub>4</sub>    | 697.548501 | -     | -2 | w4 - NH <sub>3</sub> , d4 - H <sub>2</sub> O    |
|            |        |                                                                                                  |            | 1.028 |    |                                                 |
| 703.476698 | 8.4    | C <sub>151</sub> H <sub>184</sub> N <sub>53</sub> O <sub>78</sub> P <sub>15</sub> S <sub>1</sub> | 703.477519 | 1.167 | -7 | M - 7H - NH <sub>3</sub> - 3T                   |
|            |        |                                                                                                  |            |       |    |                                                 |
| 706.061808 | 88.1   | C <sub>43</sub> H <sub>54</sub> N <sub>16</sub> O <sub>23</sub> P <sub>4</sub> S <sub>4</sub>    | 706.061776 | -     | -2 | w4                                              |
|            |        |                                                                                                  |            | 0.045 |    |                                                 |
| 713.054218 | 5.2    | C <sub>108</sub> H <sub>137</sub> N <sub>38</sub> O <sub>57</sub> P <sub>11</sub> S <sub>1</sub> | 713.053351 | -     | -5 | w11 - B(A)                                      |
|            |        |                                                                                                  |            | 1.216 |    |                                                 |
| 716.071767 | 5.4    | C <sub>113</sub> H <sub>141</sub> N <sub>39</sub> O <sub>57</sub> P <sub>10</sub> S <sub>1</sub> | 716.071060 | -     | -5 | b11                                             |
|            |        |                                                                                                  |            | 0.988 |    |                                                 |
| 720.225655 | 9.0    | C <sub>133</sub> H <sub>166</sub> N <sub>47</sub> O <sub>68</sub> P <sub>13</sub> S <sub>1</sub> | 720.224967 | -     | -6 | w13 - H <sub>2</sub> O, d13 - H <sub>2</sub> O  |
|            |        |                                                                                                  |            | 0.955 |    |                                                 |
| 721.341468 | 476.6  | C <sub>155</sub> H <sub>189</sub> N <sub>57</sub> O <sub>79</sub> P <sub>15</sub> S <sub>1</sub> | 721.341281 | -     | -7 | c15 - 2H                                        |
|            |        |                                                                                                  |            | 0.260 |    |                                                 |
| 724.736138 | 47.2   | C <sub>68</sub> H <sub>85</sub> N <sub>23</sub> O <sub>36</sub> P <sub>6</sub> S <sub>6</sub>    | 724.735309 | -     | -3 | y7 - B(dA)                                      |
|            |        |                                                                                                  |            | 1.144 |    |                                                 |
| 728.068317 | 18.7   | C <sub>68</sub> H <sub>83</sub> N <sub>25</sub> O <sub>35</sub> P <sub>6</sub> S <sub>6</sub>    | 728.067170 | -     | -3 | y7 - B(mC)                                      |
|            |        |                                                                                                  |            | 1.575 |    |                                                 |

|            |        |                                       |            |       |    |       |                                          |  |
|------------|--------|---------------------------------------|------------|-------|----|-------|------------------------------------------|--|
| 736.091701 | 22.5   |                                       |            |       |    |       |                                          |  |
| 738.494095 | 23.5   |                                       |            |       |    |       |                                          |  |
| 741.230883 | 11.6   | $C_{139}H_{172}N_{47}O_{71}P_{13}S_1$ | 741.230249 | -     | -6 | 0.856 | b14 - B(A) - H2O, b14 - B(G) - 2H        |  |
| 747.091318 | 70.6   |                                       |            |       |    |       |                                          |  |
| 751.265622 | 5.8    | $C_{118}H_{146}N_{39}O_{60}P_{11}S_1$ | 751.265000 | -     | -5 | 0.827 | b12 - B(G) - H2O, z12 - B(A) - NH3       |  |
| 752.411492 | 50.9   | $C_{73}H_{90}N_{22}O_{38}P_6S_6$      | 752.410602 | -     | -3 | 1.183 | a7 - 2H, b7 - H2O                        |  |
| 755.079986 | 18.4   | $C_{48}H_{60}N_{16}O_{25}P_4S_4$      | 755.080166 | 0.239 | -2 |       | z5 - B(dA)                               |  |
| 756.716866 | 14.6   | $C_{68}H_{86}N_{23}O_{38}P_7S_7$      | 756.716471 | -     | -3 | 0.522 | w7 - B(dA)                               |  |
| 763.740349 | 19.5   | $C_{144}H_{177}N_{52}O_{71}P_{13}S_1$ | 763.739332 | -     | -6 | 1.331 | b14 - H2O, y14 - H2O, z14 - 2H, a14 - 2H |  |
| 768.077326 | 9.8    | $C_{48}H_{58}N_{18}O_{25}P_4S_4$      | 768.075415 | -     | -2 | 2.489 | y5 - B(dC)                               |  |
| 769.753799 | 374.0  | $C_{73}H_{90}N_{28}O_{36}P_6S_6$      | 769.753474 | -     | -3 | 0.422 | y7                                       |  |
| 774.816636 | 7.5    | $C_{98}H_{122}N_{29}O_{52}P_9S_9$     | 774.815688 | -     | -4 | 1.223 | b10 - B(dG) - 2H, b10 - B(A) - H2O       |  |
| 784.392792 | 8.0    | $C_{73}H_{91}N_{22}O_{40}P_7S_7$      | 784.391765 | -     | -3 | 1.309 | d7 - H2O                                 |  |
| 801.734165 | 9.8    | $C_{73}H_{91}N_{28}O_{38}P_7S_7$      | 801.734636 | 0.587 | -3 |       | w7                                       |  |
| 808.579758 | 35.9   | $C_{103}H_{127}N_{34}O_{52}P_9S_9$    | 808.579312 | -     | -4 | 0.552 | a10 - 2H, b10 - H2O                      |  |
| 809.587847 | 59.1   | $C_{53}H_{63}N_{17}O_{27}P_4S_4$      | 809.588355 | 0.627 | -2 |       | b5 - H2O, a5 - 2H                        |  |
| 815.009010 | 22.5   |                                       |            |       |    |       |                                          |  |
| 817.070655 | 396.8  | $C_{78}H_{97}N_{22}O_{42}P_7S_7$      | 817.070691 | 0.044 | -3 |       | b8 - B(dG) - 2H, b8 - B(A) - H2O         |  |
| 818.594763 | 21.6   | $C_{53}H_{65}N_{17}O_{28}P_4S_4$      | 818.593637 | -     | -2 | 1.376 | b5                                       |  |
| 823.811700 | 281.0  |                                       |            |       |    |       |                                          |  |
| 824.020052 | 29.3   |                                       |            |       |    |       |                                          |  |
| 830.603910 | 1217.8 | $C_{53}H_{65}N_{21}O_{26}P_4S_4$      | 830.604871 | 1.157 | -2 |       | y5                                       |  |
| 841.733835 | 6.4    | $C_{156}H_{191}N_{56}O_{79}P_{15}S_1$ | 841.734803 | 1.150 | -6 |       | M - 6H - H2O - 2T                        |  |
| 857.074832 | 80.4   | $C_{108}H_{134}N_{34}O_{56}P_{10}S_1$ | 857.074379 | -     | -4 | 0.528 | b11 - B(A) - H2O, b11 - B(dG) - 2H       |  |
| 862.089961 | 12.0   | $C_{83}H_{102}N_{27}O_{42}P_7S_7$     | 862.088856 | -     | -3 | 1.282 | b8 - H2O, a8 - 2H                        |  |
| 878.578075 | 42.5   | $C_{53}H_{66}N_{21}O_{28}P_5S_5$      | 878.576614 | -     | -2 | 1.663 | w5                                       |  |
| 885.063632 | 34.8   |                                       |            |       |    |       |                                          |  |
| 906.577844 | 312.0  | $C_{58}H_{70}N_{17}O_{31}P_5S_5$      | 906.578488 | 0.710 | -2 |       | b6 - B(mC) - H2O, b6 - B(T) - NH3        |  |
| 907.582273 | 24.4   | $C_{57}H_{70}N_{18}O_{31}P_5S_5$      | 907.580025 | -     | -2 | 2.477 | b6 - B(T) - CH3                          |  |
| 926.748741 | 265.9  | $C_{88}H_{109}N_{27}O_{46}P_8S_8$     | 926.748945 | 0.220 | -3 |       | b9 - B(A) - H2O, b9 - B(dG) - 2H         |  |
| 942.158461 | 18.0   |                                       |            |       |    |       |                                          |  |
| 969.109520 | 12.6   | $C_{63}H_{77}N_{20}O_{32}P_5S_5$      | 969.107944 | -     | -2 | 1.627 | a6 - 2H, b6 - H2O                        |  |
| 980.138069 | 18.9   | $C_{33}H_{37}N_{13}O_{15}P_2S_2$      | 980.137597 | -     | -1 | 0.481 | y3 - H2O, a3 - 2H, b3 - H2O, z3 - 2H     |  |
| 998.148489 | 154.5  | $C_{33}H_{39}N_{13}O_{16}P_2S_2$      | 998.148162 | -     | -1 |       | b3, y3                                   |  |

|            |      |                                  |            |       |       |                                        |
|------------|------|----------------------------------|------------|-------|-------|----------------------------------------|
|            |      |                                  |            |       | 0.328 |                                        |
| 999.153265 | 35.9 |                                  |            |       |       |                                        |
| 1094.09195 | 11.8 | $C_{33}H_{40}N_{13}O_{18}P_3S_3$ | 1094.09165 | -     | -1    | w3, d3                                 |
| 5          |      |                                  | 0          | 0.278 |       |                                        |
| 1226.11099 | 8.8  | $C_{78}H_{97}N_{22}O_{42}P_7S_7$ | 1226.10967 | -     | -2    | b8 - B(dG) -<br>2H, b8 - B(A) -<br>H2O |
| 4          |      |                                  | 5          | 1.075 |       |                                        |
|            |      |                                  | Abs mean   | 0.856 |       |                                        |
|            |      |                                  | error      |       |       |                                        |
|            |      |                                  | Abs mean   | 0.609 |       |                                        |
|            |      |                                  | std dev    |       |       |                                        |

---

**Table S3 showing peak list, signal-to-noise ratio (S/N), elemental composition, and possible assignments with mass errors (ppm) of the [M-8H]<sup>8-</sup> MALAT-1 by IRMPD MS/MS, internal fragments marked by character (J), base losses are shown inside the parenthesis.**

| Measured <i>mz</i> | S/N   | Elemental Composition                                            | Theoretical <i>mz</i> | Error (ppm) | Charge | Assignment                                                                                                                                                                                                                                                                                                                                                                                                                  |        |
|--------------------|-------|------------------------------------------------------------------|-----------------------|-------------|--------|-----------------------------------------------------------------------------------------------------------------------------------------------------------------------------------------------------------------------------------------------------------------------------------------------------------------------------------------------------------------------------------------------------------------------------|--------|
| 150.042285         | 32.6  |                                                                  |                       |             |        |                                                                                                                                                                                                                                                                                                                                                                                                                             |        |
| 192.973096         | 974.9 |                                                                  |                       |             |        |                                                                                                                                                                                                                                                                                                                                                                                                                             |        |
| 193.976452         | 49.3  |                                                                  |                       |             |        |                                                                                                                                                                                                                                                                                                                                                                                                                             |        |
| 194.968900         | 38.5  |                                                                  |                       |             |        |                                                                                                                                                                                                                                                                                                                                                                                                                             |        |
| 211.165591         | 50.0  |                                                                  |                       |             |        |                                                                                                                                                                                                                                                                                                                                                                                                                             |        |
| 255.994508         | 233.5 |                                                                  |                       |             |        |                                                                                                                                                                                                                                                                                                                                                                                                                             |        |
| 319.015934         | 130.4 | C <sub>10</sub> H <sub>13</sub> N <sub>2</sub> O <sub>6</sub> PS | 319.015918            | -0.050      | -1     | x10(T)b7,<br>y10(T)c7,<br>z10(T)d7,<br>b5(T)x12,<br>x7(T)b10,<br>c5(T)y12,<br>a7(T)w10,<br>z7(T)d10,<br>d5(T)z12,<br>a5(T)w12,<br>b7(T)x10,<br>c7(T)y10,<br>d7(T)z10,<br>a10(T)w7,<br>b10(T)x7,<br>c10(T)y7,<br>d10(T)z7,<br>y7(T)c10,<br>d4(T)z13,<br>w7(T)a10,<br>z13(T)d4,<br>x12(T)b5,<br>c4(T)y13,<br>y12(T)c5,<br>w12(T)a5,<br>w13(T)a4,<br>y13(T)c4,<br>b4(T)x13,<br>x13(T)b4,<br>z12(T)d5,<br>w10(T)a7,<br>a4(T)w13 | J<br>1 |
| 328.027483         | 55.5  | C <sub>10</sub> H <sub>12</sub> N <sub>5</sub> O <sub>4</sub> PS | 328.027486            | 0.008       | -1     | x5a12 + 1H,<br>a8(A)w9,<br>w9(A)a8,<br>x9(A)b8,<br>y9(A)c8,<br>z9(A)d8,<br>w8(A)a9,<br>y8(A)c9,<br>z8(A)d9,<br>w6(A)a11,<br>x6(A)b11,<br>y6(A)c11,<br>z6(A)d11,<br>b8(A)x9,<br>c12(G)z5,<br>c8(A)y9,<br>z5(G)c12,<br>d8(A)z9,<br>a9(A)w8,<br>b9(A)x8,<br>c9(A)y8,<br>x8(A)b9,<br>a11(A)w6,<br>b11(A)x6,<br>d9(A)z8,<br>c11(A)y6,                                                                                            | J<br>2 |

|            |       |                                  |            |       |    |                                                                                                                                                                                                                                                                                                                      |        |
|------------|-------|----------------------------------|------------|-------|----|----------------------------------------------------------------------------------------------------------------------------------------------------------------------------------------------------------------------------------------------------------------------------------------------------------------------|--------|
| 337.026480 | 63.5  | $C_{10}H_{15}N_2O_7PS$           | 337.026483 | 0.008 | -1 | a12(G)x5,<br>d11(A)z6<br>y13(T)d4 + 2H,<br>y12(T)d5 + 2H,<br>y10(T)d7 + 2H,<br>y7(T)d10 + 2H,<br>b4(T)w13 + 2H,<br>w12(T)b5 + 1H,<br>b5(T)w12 + 2H,<br>b7(T)w10 + 2H,<br>d7(T)y10 + 2H,<br>d10(T)y7 + 2H,<br>b10(T)w7 + 2H,<br>w7(T)b10 + 1H,<br>w13(T)b4 + 1H,<br>w10(T)b7 + 1H,<br>d4(T)y13 + 2H,<br>d5(T)y12 + 2H | J<br>3 |
| 346.026794 | 24.6  | $C_{11}H_{14}N_3O_6PS$           | 346.026817 | 0.067 | -1 | z15(dC)d2,<br>d2(dC)z15,<br>c2(dC)y15,<br>b2(dC)x15,<br>a2(dC)w15,<br>w15(dC)a2,<br>x15(dC)b2, w1<br>- H2O,<br>y15(dC)c2                                                                                                                                                                                             | J<br>4 |
| 352.984577 | 147.9 | $C_{11}H_{12}N_5O_5PS$           | 356.022400 | 0.011 | -1 | b14(dA)x3,<br>z3(dA)d14,<br>d3(dA)z14,<br>w14(dA)a3,<br>a14(dA)w3,<br>c14(dA)y3,<br>y3(dA)c14,<br>x3(dA)b14,<br>x2a15 + 1H,<br>c3(dA)y14,<br>a15(dG)x2,<br>b3(dA)x14,<br>z2(dG)c15,<br>a3(dA)w14,<br>c15(dG)z2,<br>x14(dA)b3,<br>y14(dA)c3,<br>z14(dA)d3,<br>w3(dA)a14,<br>d14(dA)z3                                 | J<br>5 |
| 356.022396 | 67.0  |                                  | 0.011      | -1    |    |                                                                                                                                                                                                                                                                                                                      |        |
| 364.025690 | 17.8  | $C_{33}H_{40}N_{13}O_{18}P_3S_3$ | 364.025699 | 0.024 | -3 | d3, w3                                                                                                                                                                                                                                                                                                               |        |
| 368.027344 | 193.6 | $C_{22}H_{28}N_8O_{13}P_2S_2$    | 368.027348 | 0.010 | -2 | w2, d2                                                                                                                                                                                                                                                                                                               |        |
| 371.493471 | 39.7  | $C_{11}H_{14}N_5O_7PS$           | 390.027880 | -     | -1 | d15(dG)y2 +<br>2H, w2b15 +<br>1H, y2d15 +<br>2H, b15(dG)w2<br>+ 2H, d1                                                                                                                                                                                                                                               | J<br>6 |
| 390.027942 | 26.0  |                                  | 0.158      | -1    |    |                                                                                                                                                                                                                                                                                                                      |        |
| 398.982201 | 32.0  | $C_{10}H_{14}N_2O_8P_2S_2$       | 414.959405 | 0.094 | -1 | x12(T)d5 + 1H,<br>x13(T)d4 + 1H,<br>d10(T)x7,<br>c10(T)w7,<br>c7(T)w10,<br>d7(T)x10,<br>x10(T)d7 + 1H,<br>d5(T)x12,<br>c5(T)w12,<br>x7(T)d10 + 1H,<br>w13(T)c4,<br>w12(T)c5,<br>d4(T)x13,<br>w10(T)c7,<br>c4(T)w13,<br>w7(T)c10                                                                                      | J<br>7 |
| 414.959366 | 94.5  |                                  | 0.094      | -1    |    |                                                                                                                                                                                                                                                                                                                      |        |
| 417.052648 | 138.6 |                                  |            |       |    |                                                                                                                                                                                                                                                                                                                      |        |

|            |            |                                          |            |       |    |                                                                                                                                             |        |  |
|------------|------------|------------------------------------------|------------|-------|----|---------------------------------------------------------------------------------------------------------------------------------------------|--------|--|
| 418.055928 | 22.0       |                                          |            |       |    |                                                                                                                                             |        |  |
| 420.511859 | 100.6      |                                          |            |       |    |                                                                                                                                             |        |  |
| 432.969924 | 52.9       | $C_{10}H_{16}N_2O_9P_2S_2$               | 432.969970 | 0.107 | -1 | d7(T)w10 + 2H,<br>w7(T)d10 + 2H,<br>d10(T)w7 + 2H,<br>d5(T)w12 + 2H,<br>w13(T)d4 + 2H,<br>d4(T)w13 + 2H,<br>w10(T)d7 + 2H,<br>w12(T)d5 + 2H | J<br>8 |  |
| 442.059113 | 76.2       |                                          |            |       |    |                                                                                                                                             |        |  |
| 453.626957 | 18.6       | $C_{68}H_{86}N_{23}O_{38}P_7S_7$         | 453.626972 | 0.033 | -5 | w7 - B(dA)                                                                                                                                  |        |  |
| 470.054057 | 64.3       | $C_{16}H_{18}N_5O_8PS$                   | 470.054094 | 0.080 | -1 | z2 - B(dC) -<br>OCH2                                                                                                                        |        |  |
| 470.372095 | 41.4       | $C_{43}H_{54}N_{16}O_{23}P_4S_4$         | 470.372092 | -     | -3 | w4                                                                                                                                          |        |  |
|            |            |                                          |            | 0.006 |    |                                                                                                                                             |        |  |
| 479.008402 | 41.4       |                                          |            |       |    |                                                                                                                                             |        |  |
| 480.637956 | 29.5       | $C_{73}H_{91}N_{28}O_{38}P_7S_7$         | 480.637871 | -     | -5 | w7                                                                                                                                          |        |  |
|            |            |                                          |            | 0.176 |    |                                                                                                                                             |        |  |
| 494.985500 | 84.1       |                                          |            |       |    |                                                                                                                                             |        |  |
| 495.988907 | 15.3       |                                          |            |       |    |                                                                                                                                             |        |  |
| 498.570350 | 37.8       | $C_{33}H_{39}N_{13}O_{16}P_2S_2$         | 498.570443 | 0.186 | -2 | b3, y3                                                                                                                                      |        |  |
| 503.997091 | 41.2       |                                          |            |       |    |                                                                                                                                             |        |  |
| 512.996053 | 1684.<br>0 |                                          |            |       |    |                                                                                                                                             |        |  |
| 513.999466 | 266.3      |                                          |            |       |    |                                                                                                                                             |        |  |
| 515.000378 | 33.9       |                                          |            |       |    |                                                                                                                                             |        |  |
| 522.007646 | 25.7       |                                          |            |       |    |                                                                                                                                             |        |  |
| 538.002603 | 80.7       |                                          |            |       |    |                                                                                                                                             |        |  |
| 545.054822 | 97.0       |                                          |            |       |    |                                                                                                                                             |        |  |
| 553.400759 | 129.9      | $C_{53}H_{65}N_{21}O_{26}P_4S_4$         | 553.400822 | 0.114 | -3 | y5                                                                                                                                          |        |  |
| 554.065887 | 23.1       |                                          |            |       |    |                                                                                                                                             |        |  |
| 567.285847 | 577.0      | $C_{68}H_{86}N_{23}O_{38}P_7S_7$         | 567.285534 | -     | -4 | w7 - B(dA)                                                                                                                                  |        |  |
|            |            |                                          |            | 0.551 |    |                                                                                                                                             |        |  |
| 577.063399 | 23.4       | $C_{73}H_{90}N_{28}O_{36}P_6S_6$         | 577.063286 | -     | -4 | y7                                                                                                                                          |        |  |
|            |            |                                          |            | 0.195 |    |                                                                                                                                             |        |  |
| 580.056287 | 16.7       | $C_{92}H_{113}N_{32}O_{46}P_8S_8$        | 580.055790 | -     | -5 | a9 - CH3                                                                                                                                    |        |  |
|            |            |                                          |            | 0.857 |    |                                                                                                                                             |        |  |
| 585.382052 | 234.5      | $C_{53}H_{66}N_{21}O_{28}P_5S_5$         | 585.381984 | -     | -3 | w5                                                                                                                                          |        |  |
|            |            |                                          |            | 0.117 |    |                                                                                                                                             |        |  |
| 586.047104 | 46.8       | $C_{127}H_{157}N_{44}O_{66}P_{12}S_{12}$ | 586.046745 | -     | -7 | b13 - B(mC) -<br>CH3                                                                                                                        |        |  |
|            |            |                                          |            | 0.612 |    |                                                                                                                                             |        |  |
| 597.305980 | 13.9       |                                          |            |       |    |                                                                                                                                             |        |  |
| 601.049588 | 476.6      | $C_{73}H_{91}N_{28}O_{38}P_7S_7$         | 601.049158 | -     | -4 | w7                                                                                                                                          |        |  |
|            |            |                                          |            | 0.716 |    |                                                                                                                                             |        |  |
| 604.384341 | 63.6       |                                          | 604.385842 | 2.484 | -3 | a6 - B(mC)                                                                                                                                  |        |  |
| 612.551467 | 20.7       | $C_{78}H_{97}N_{22}O_{42}P_7S_7$         | 612.551199 | -     | -4 | b8 - B(A) -<br>H2O, b8 -<br>B(dG) - 2H<br>y6 - B(dA)                                                                                        |        |  |
|            |            |                                          |            | 0.437 |    |                                                                                                                                             |        |  |
| 618.060944 | 23.4       | $C_{58}H_{72}N_{21}O_{30}P_5S_5$         | 618.060910 | -     | -3 |                                                                                                                                             |        |  |
|            |            |                                          |            | 0.055 |    |                                                                                                                                             |        |  |
| 630.922877 | 57.2       | $C_{156}H_{194}N_{50}O_{84}P_{15}S_{15}$ | 630.921734 | -     | -8 | M - 8H - 4H -<br>2dA                                                                                                                        |        |  |
|            |            |                                          |            | 1.811 |    |                                                                                                                                             |        |  |
| 631.547891 | 6.5        | $C_{38}H_{51}N_{11}O_{22}P_4S_4$         | 631.544896 | -     | -2 | w4 - B(dG) +<br>2H                                                                                                                          |        |  |
|            |            |                                          |            | 4.742 |    |                                                                                                                                             |        |  |
| 641.118365 | 271.4      | $C_{22}H_{27}N_8O_{11}PS$                | 641.118485 | 0.187 | -1 | b2, y2                                                                                                                                      |        |  |
| 642.121779 | 60.6       |                                          |            |       |    |                                                                                                                                             |        |  |
| 647.927175 | 876.3      | $C_{161}H_{200}N_{55}O_{84}P_{15}S_{15}$ | 647.929524 | 3.625 |    | M - 8H - dA                                                                                                                                 |        |  |
|            |            |                                          |            |       |    |                                                                                                                                             |        |  |
| 650.818018 | 5.0        | $C_{83}H_{104}N_{27}O_{43}P_7S_7$        | 650.817464 | -     | -4 | b8                                                                                                                                          |        |  |
|            |            |                                          |            | 0.852 |    |                                                                                                                                             |        |  |
| 658.089902 | 87.0       | $C_{43}H_{53}N_{16}O_{21}P_3S_3$         | 658.090032 | 0.198 | -2 | y4                                                                                                                                          |        |  |
| 658.447318 | 29.8       |                                          |            |       |    |                                                                                                                                             |        |  |

|            |        |                                       |            |       |    |                                           |
|------------|--------|---------------------------------------|------------|-------|----|-------------------------------------------|
| 658.581878 | 38.6   | $C_{43}H_{52}N_{15}O_{22}P_3S_3$      | 658.582040 | 0.246 | -2 | b4                                        |
| 661.046256 | 18.2   |                                       |            |       |    |                                           |
| 663.061388 | 15.2   |                                       |            |       |    |                                           |
| 664.811623 | 507.8  | $C_{166}H_{205}N_{60}O_{84}P_{15}S_1$ | 664.811336 | -     | -8 | M - 8H                                    |
|            |        |                                       |            | 0.432 |    |                                           |
| 670.551939 | 16.1   | $C_{83}H_{104}N_{27}O_{44}P_8S_8$     | 670.552651 | 1.063 | -4 | c8                                        |
| 677.513599 | 13.5   |                                       |            |       |    |                                           |
| 685.458267 | 31.5   | $C_{108}H_{134}N_{34}O_{56}P_{10}S_1$ | 685.458048 | -     | -5 | b11 - B(dG) -<br>2H, b11 - B(A) -<br>H2O  |
|            |        |                                       |            | 0.320 |    |                                           |
| 685.857091 | 22.7   |                                       |            |       |    |                                           |
| 694.810341 | 110.0  | $C_{88}H_{109}N_{27}O_{46}P_8S_8$     | 694.809890 | -     | -4 | b9 - B(dG) -<br>2H, b9 - B(A) -<br>H2O    |
|            |        |                                       |            | 0.649 |    |                                           |
| 697.056874 | 7.0    | $C_{43}H_{52}N_{16}O_{22}P_4S_4$      | 697.056494 | -     | -2 | w4 - H2O                                  |
|            |        |                                       |            | 0.546 |    |                                           |
| 697.548430 | 7.1    | $C_{43}H_{51}N_{15}O_{23}P_4S_4$      | 697.548501 | 0.101 | -2 | w4 - NH3, d4 -<br>H2O                     |
| 703.619510 | 13.9   | $C_{150}H_{183}N_{54}O_{78}P_{15}S_1$ | 703.619697 | 0.266 | -7 | d15 - B(T) -<br>NH3, d15 -<br>B(mC) - H2O |
|            |        |                                       |            |       |    | w4                                        |
| 706.061275 | 49.4   | $C_{43}H_{54}N_{16}O_{23}P_4S_4$      | 706.061776 | 0.710 | -2 |                                           |
| 719.051311 | 121.0  | $C_{22}H_{26}N_8O_{12}P_2S_2$         | 719.051408 | 0.135 | -1 | d2 - H2O, w2 -<br>H2O                     |
| 719.738330 | 14.4   | $C_{68}H_{86}N_{23}O_{35}P_6S_6$      | 719.739612 | 1.781 | -3 | z7 - B(dA) + 1H                           |
| 721.198492 | 49.7   | $C_{156}H_{194}N_{50}O_{84}P_{15}S_1$ | 721.197307 | -     | -7 | M - 7H - 4H -<br>2dA                      |
|            |        |                                       |            | 1.643 |    |                                           |
| 724.734891 | 34.4   | $C_{68}H_{85}N_{23}O_{36}P_6S_6$      | 724.735309 | 0.577 | -3 | y7 - B(dA)                                |
| 736.091738 | 18.6   |                                       |            |       |    |                                           |
| 740.635248 | 2133.5 |                                       | 740.634781 | -     |    | M - 7H - 3H -<br>dA                       |
|            |        |                                       |            | 0.631 |    |                                           |
| 740.901728 | 12.7   |                                       |            |       |    |                                           |
| 743.994048 | 19.1   |                                       |            |       |    |                                           |
| 746.087364 | 246.2  |                                       |            |       |    |                                           |
| 752.411435 | 6.7    | $C_{73}H_{90}N_{22}O_{38}P_6S_6$      | 752.410602 | -     | -3 | a7 - 2H, b7 -<br>H2O                      |
|            |        |                                       |            | 1.108 |    |                                           |
| 755.080559 | 31.7   | $C_{48}H_{60}N_{16}O_{25}P_4S_4$      | 755.080166 | -     | -2 | z5 - B(dA)                                |
|            |        |                                       |            | 0.520 |    |                                           |
| 759.032567 | 36.6   |                                       |            |       |    |                                           |
| 762.082306 | 50.2   |                                       |            |       |    |                                           |
| 763.085669 | 14.8   |                                       |            |       |    |                                           |
| 768.075457 | 19.8   | $C_{48}H_{58}N_{18}O_{25}P_4S_4$      | 768.075415 | -     | -2 | y5 - B(dC)                                |
|            |        |                                       |            | 0.054 |    |                                           |
| 769.753990 | 146.0  | $C_{73}H_{90}N_{28}O_{36}P_6S_6$      | 769.753474 | -     | -3 | y7                                        |
|            |        |                                       |            | 0.671 |    |                                           |
| 775.384608 | 19.9   |                                       |            |       |    |                                           |
| 784.391943 | 5.7    | $C_{73}H_{91}N_{22}O_{40}P_7S_7$      | 784.391765 | -     | -3 | d7 - H2O                                  |
|            |        |                                       |            | 0.227 |    |                                           |
| 801.734667 | 16.1   | $C_{73}H_{91}N_{28}O_{38}P_7S_7$      | 801.734636 | -     | -3 | w7                                        |
|            |        |                                       |            | 0.039 |    |                                           |
| 803.051979 | 15.5   | $C_{48}H_{61}N_{16}O_{27}P_5S_5$      | 803.051909 | -     | -2 | x5 - B(dA) +<br>1H, w5 - B(dG)            |
|            |        |                                       |            | 0.087 |    |                                           |
| 808.043286 | 16.6   | $C_{47}H_{57}N_{19}O_{26}P_5S_5$      | 808.043413 | 0.158 | -2 | w5 - B(T) - CH3                           |
| 809.587794 | 19.2   | $C_{53}H_{63}N_{17}O_{27}P_4S_4$      | 809.588355 | 0.693 | -2 | b5 - H2O, a5 -<br>2H                      |
| 815.008762 | 52.2   |                                       |            |       |    |                                           |
| 816.012031 | 16.0   |                                       |            |       |    |                                           |
| 817.071087 | 764.6  | $C_{78}H_{97}N_{22}O_{42}P_7S_7$      | 817.070691 | -     | -3 | b8 - B(dG) -<br>2H, b8 - B(A) -<br>H2O    |
|            |        |                                       |            | 0.484 |    |                                           |
| 817.400742 | 47.9   | $C_{78}H_{96}N_{21}O_{43}P_7S_7$      | 817.398696 | -     | -3 | b8 - B(A) - NH3                           |
|            |        |                                       |            | 2.503 |    |                                           |
| 822.616164 | 20.5   |                                       |            |       |    |                                           |
| 823.311133 | 137.8  |                                       |            |       |    |                                           |



|            |        |                                       |            |       |    |                                      |
|------------|--------|---------------------------------------|------------|-------|----|--------------------------------------|
| 830.604221 | 1243.4 | $C_{53}H_{65}N_{21}O_{26}P_4S_4$      | 830.604871 | 0.782 | -2 | y5                                   |
| 841.566828 | 26.9   | $C_{156}H_{194}N_{50}O_{84}P_{15}S_1$ | 841.564737 | -     | -6 | M - 6H - 4H - 2dA                    |
| 842.030939 | 386.4  |                                       |            |       |    |                                      |
| 849.571298 | 15.7   | $C_{107}H_{132}N_{34}O_{55}P_{10}S_1$ | 849.571738 | 0.517 | -4 | a11 - B(dG) - CH3                    |
| 857.075161 | 17.3   | $C_{108}H_{134}N_{34}O_{56}P_{10}S_1$ | 857.074379 | -     | -4 | b11 - B(A) - H2O, b11 - B(dG) - 2H   |
| 862.423395 | 13.4   |                                       |            |       |    |                                      |
| 878.576205 | 43.4   | $C_{53}H_{66}N_{21}O_{28}P_5S_5$      | 878.576614 | 0.465 | -2 | w5                                   |
| 881.731105 | 53.4   |                                       |            |       |    |                                      |
| 905.046742 | 21.1   |                                       |            |       |    |                                      |
| 906.577853 | 230.1  | $C_{58}H_{70}N_{17}O_{31}P_5S_5$      | 906.578488 | 0.700 | -2 | b6 - B(mC) - H2O, b6 - B(T) - NH3    |
| 917.569871 | 15.9   |                                       |            |       |    |                                      |
| 926.749680 | 64.8   | $C_{88}H_{109}N_{27}O_{46}P_8S_8$     | 926.748945 | -     | -3 | b9 - B(A) - H2O, b9 - B(dG) - 2H     |
| 930.590531 | 71.8   |                                       |            |       |    |                                      |
| 940.067833 | 13.6   |                                       |            |       |    |                                      |
| 942.158090 | 24.9   |                                       |            |       |    |                                      |
| 946.591909 | 21.0   | $C_{118}H_{149}N_{42}O_{59}P_{11}S_1$ | 946.592515 | 0.640 | -4 | z12 - B(mC) + 2H                     |
| 969.108930 | 5.3    | $C_{63}H_{77}N_{20}O_{32}P_5S_5$      | 969.107944 | -     | -2 | a6 - 2H, b6 - H2O                    |
| 978.113951 | 7.0    | $C_{63}H_{79}N_{20}O_{33}P_5S_5$      | 978.113226 | -     | -2 | b6                                   |
| 980.137463 | 8.4    | $C_{33}H_{37}N_{13}O_{15}P_2S_2$      | 980.137597 | 0.136 | -1 | y3 - H2O, a3 - 2H, b3 - H2O, z3 - 2H |
| 996.068657 | 14.2   |                                       |            |       |    |                                      |
| 998.147479 | 106.3  | $C_{33}H_{39}N_{13}O_{16}P_2S_2$      | 998.148162 | 0.684 | -1 | b3, y3                               |
| 1056.11525 | 14.9   |                                       |            |       |    |                                      |
| 1076.08099 | 7.5    | $C_{33}H_{38}N_{13}O_{17}P_3S_3$      | 1076.08108 | 0.087 | -1 | d3 - H2O, w3 - H2O                   |
| 1091.11730 | 95.8   |                                       |            |       |    |                                      |
| 1092.12089 | 36.9   |                                       |            |       |    |                                      |
| 1094.09104 | 155.4  | $C_{33}H_{40}N_{13}O_{18}P_3S_3$      | 1094.09165 | 0.556 | -1 | w3, d3                               |
| 1129.12030 | 8.0    | $C_{73}H_{90}N_{22}O_{38}P_6S_6$      | 1129.11954 | -     | -2 | b7 - H2O, a7 - 2H                    |
| 1155.13448 | 8.4    | $C_{73}H_{90}N_{28}O_{36}P_6S_6$      | 1155.13384 | -     | -2 | y7                                   |
| 1172.03862 | 42.9   |                                       |            |       |    |                                      |
| 1173.04177 | 14.8   |                                       |            |       |    |                                      |
| 1178.13836 | 24.8   |                                       |            |       |    |                                      |
| 1226.11080 | 55.5   | $C_{78}H_{97}N_{22}O_{42}P_7S_7$      | 1226.10967 | -     | -2 | b8 - B(dG) - 2H, b8 - B(A) - H2O     |
| 1266.12333 | 32.9   |                                       |            |       |    |                                      |
| 1300.16123 | 9.0    | $C_{43}H_{50}N_{15}O_{21}P_3S_3$      | 1300.16079 | -     | -1 | y4 - NH3, a4 - 2H, b4 - H2O          |
| 1318.17153 | 73.2   | $C_{43}H_{52}N_{15}O_{22}P_3S_3$      | 1318.17135 | -     | -1 | b4                                   |

|            |      |                                       |  |                  |       |    |                                   |
|------------|------|---------------------------------------|--|------------------|-------|----|-----------------------------------|
| 4          |      |                                       |  | 6                | 0.135 |    |                                   |
| 1413.13035 | 10.6 | $C_{43}H_{54}N_{16}O_{23}P_4S_4$      |  | 1413.13082       | 0.334 | -1 | w4                                |
| 6          |      |                                       |  | 8                |       |    |                                   |
| 1620.18398 | 8.5  | $C_{53}H_{63}N_{17}O_{27}P_4S_4$      |  | 1620.18398       | -     | -1 | b5 - H2O, a5 - 2H                 |
| 8          |      |                                       |  | 6                | 0.001 |    |                                   |
| 1662.21935 | 10.3 | $C_{53}H_{65}N_{21}O_{26}P_4S_4$      |  | 1662.21701       | -     | -1 | y5                                |
| 7          |      |                                       |  | 8                | 1.407 |    |                                   |
| 1718.22126 | 30.3 |                                       |  |                  |       |    |                                   |
| 8          |      |                                       |  |                  |       |    |                                   |
| 1719.22524 | 21.2 |                                       |  |                  |       |    |                                   |
| 9          |      |                                       |  |                  |       |    |                                   |
| 1814.16718 | 15.6 | $C_{58}H_{70}N_{17}O_{31}P_5S_5$      |  | 1814.16425       | -     | -1 | b6 - B(mC) - H2O, b6 - B(T) - NH3 |
| 3          |      |                                       |  | 3                | 1.615 |    |                                   |
| 1880.10356 | 8.2  |                                       |  |                  |       |    |                                   |
| 5          |      |                                       |  |                  |       |    |                                   |
| 1894.19319 | 21.2 | $C_{118}H_{149}N_{42}O_{59}P_{11}S_1$ |  | 1894.19230       | -     | -2 | z12 - B(mC) + 2H                  |
| 9          |      | 1                                     |  | 6                | 0.472 |    |                                   |
| 1895.19532 | 12.2 |                                       |  |                  |       |    |                                   |
| 5          |      |                                       |  |                  |       |    |                                   |
|            |      |                                       |  | Abs mean error   | 0.438 |    |                                   |
|            |      |                                       |  | Abs mean std dev | 0.367 |    |                                   |

---

**Table S4 showing peak list, signal-to-noise ratio (S/N), elemental composition, and possible assignments with mass errors (ppm) of the [M-8H]<sup>8-</sup> MALAT-1 by UVPD MS/MS, internal fragments marked by character (J), base losses are shown inside the parenthesis.**

| Measured <i>mz</i> | S/N   | Elemental Composition                                            | Theoretical <i>mz</i> | Error (ppm) | Charge | Assignment                                                                                                                                                                                                                                                                                                                                                                                                                  |    |
|--------------------|-------|------------------------------------------------------------------|-----------------------|-------------|--------|-----------------------------------------------------------------------------------------------------------------------------------------------------------------------------------------------------------------------------------------------------------------------------------------------------------------------------------------------------------------------------------------------------------------------------|----|
| 158.925256         | 16.1  |                                                                  |                       |             |        |                                                                                                                                                                                                                                                                                                                                                                                                                             |    |
| 165.949398         | 60.0  |                                                                  |                       |             |        |                                                                                                                                                                                                                                                                                                                                                                                                                             |    |
| 174.902431         | 14.4  |                                                                  |                       |             |        |                                                                                                                                                                                                                                                                                                                                                                                                                             |    |
| 191.965070         | 26.7  | C <sub>5</sub> H <sub>6</sub> O <sub>4</sub> PS                  | 191.965165            | 0.495       | -1     | c1 - B(dG) - OCH <sub>2</sub>                                                                                                                                                                                                                                                                                                                                                                                               | J1 |
| 192.972898         | 48.8  |                                                                  |                       |             |        |                                                                                                                                                                                                                                                                                                                                                                                                                             |    |
| 208.890182         | 31.3  |                                                                  |                       |             |        |                                                                                                                                                                                                                                                                                                                                                                                                                             |    |
| 317.024071         | 39.5  | C <sub>10</sub> H <sub>13</sub> N <sub>3</sub> O <sub>5</sub> PS | 317.024077            | 0.019       | -1     | w11(mC)b6 - H <sub>2</sub> O,<br>w4(mC)b13 - H <sub>2</sub> O, x1 - OCH <sub>2</sub>                                                                                                                                                                                                                                                                                                                                        | J2 |
| 319.015911         | 177.2 | C <sub>10</sub> H <sub>13</sub> N <sub>2</sub> O <sub>6</sub> PS | 319.015918            | 0.024       | -1     | x10(T)b7,<br>y10(T)c7,<br>z10(T)d7,<br>b5(T)x12,<br>x7(T)b10,<br>c5(T)y12,<br>a7(T)w10,<br>z7(T)d10,<br>d5(T)z12,<br>a5(T)w12,<br>b7(T)x10,<br>c7(T)y10,<br>d7(T)z10,<br>a10(T)w7,<br>b10(T)x7,<br>c10(T)y7,<br>d10(T)z7,<br>y7(T)c10,<br>d4(T)z13,<br>w7(T)a10,<br>z13(T)d4,<br>x12(T)b5,<br>c4(T)y13,<br>y12(T)c5,<br>w12(T)a5,<br>w13(T)a4,<br>y13(T)c4,<br>b4(T)x13,<br>x13(T)b4,<br>z12(T)d5,<br>w10(T)a7,<br>a4(T)w13 | J3 |
| 320.019263         | 19.8  |                                                                  |                       |             |        |                                                                                                                                                                                                                                                                                                                                                                                                                             |    |
| 327.019665         | 39.6  | C <sub>10</sub> H <sub>11</sub> N <sub>5</sub> O <sub>4</sub> PS | 327.019661            | -0.011      | -1     | w8(A)b9 - H <sub>2</sub> O,<br>x5a12, w9(A)b8 - H <sub>2</sub> O,<br>w6(A)b11 - H <sub>2</sub> O                                                                                                                                                                                                                                                                                                                            | J4 |
| 328.027496         | 73.0  | C <sub>10</sub> H <sub>12</sub> N <sub>5</sub> O <sub>4</sub> PS | 328.027486            | -0.032      | -1     | x5a12 + 1H,<br>a8(A)w9,<br>w9(A)a8,<br>x9(A)b8,<br>y9(A)c8,<br>z9(A)d8,<br>w8(A)a9,<br>y8(A)c9,<br>z8(A)d9,<br>w6(A)a11,<br>x6(A)b11,<br>y6(A)c11,<br>z6(A)d11,<br>b8(A)x9,                                                                                                                                                                                                                                                 | J5 |

|            |      |                        |            |            |    |                                                                                                                                                                                                                                                                                                                                                                                                                                                                            |         |
|------------|------|------------------------|------------|------------|----|----------------------------------------------------------------------------------------------------------------------------------------------------------------------------------------------------------------------------------------------------------------------------------------------------------------------------------------------------------------------------------------------------------------------------------------------------------------------------|---------|
| 337.026479 | 13.7 | $C_{10}H_{15}N_2O_7PS$ | 337.026483 | 0.010      | -1 | c12(G)z5,<br>c8(A)y9,<br>z5(G)c12,<br>d8(A)z9,<br>a9(A)w8,<br>b9(A)x8,<br>c9(A)y8,<br>x8(A)b9,<br>a11(A)w6,<br>b11(A)x6,<br>d9(A)z8,<br>c11(A)y6,<br>a12(G)x5,<br>d11(A)z6,<br>y13(T)d4 + 2H,<br>y12(T)d5 + 2H,<br>y10(T)d7 + 2H,<br>y7(T)d10 + 2H,<br>b4(T)w13 + 2H,<br>w12(T)b5 + 1H,<br>b5(T)w12 + 2H,<br>b7(T)w10 + 2H,<br>d7(T)y10 + 2H,<br>d10(T)y7 + 2H,<br>b10(T)w7 + 2H,<br>w7(T)b10 + 1H,<br>w13(T)b4 + 1H,<br>w10(T)b7 + 1H,<br>d4(T)y13 + 2H,<br>d5(T)y12 + 2H | J6      |
| 343.014577 | 37.6 | $C_{10}H_{11}N_5O_5PS$ | 343.014575 | -<br>0.005 | -1 | w5b12 - H2O,<br>c1 - OCH2,<br>w6(A)b11 - 2H,<br>w8(A)b9 - 2H,<br>w14(dA)b3 -<br>OCH2,<br>w3(dA)b14 -<br>OCH2, w9(A)b8<br>- 2H                                                                                                                                                                                                                                                                                                                                              | J7      |
| 344.022429 | 31.7 | $C_{10}H_{12}N_5O_5PS$ | 344.022400 | -<br>0.084 | -1 | d12(G)z5,<br>x5(G)b12,<br>y5(G)c12,<br>w5(G)a12,<br>y6(A)d11,<br>z5(G)d12,<br>b8(A)w9,<br>y9(A)d8,<br>d8(A)y9,<br>c12(G)y5,<br>b9(A)w8,<br>d9(A)y8,<br>b12(G)x5,<br>a12(G)w5,<br>y8(A)d9,<br>b11(A)w6,<br>d11(A)y6                                                                                                                                                                                                                                                         | J8      |
| 346.026822 | 55.7 | $C_{11}H_{14}N_3O_6PS$ | 346.026817 | -<br>0.014 | -1 | z15(dC)d2,<br>d2(dC)z15,<br>c2(dC)y15,<br>b2(dC)x15,<br>a2(dC)w15,<br>w15(dC)a2,<br>x15(dC)b2, w1<br>- H2O,<br>y15(dC)c2                                                                                                                                                                                                                                                                                                                                                   | J9      |
| 356.022419 | 75.0 | $C_{11}H_{12}N_5O_5PS$ | 356.022400 | -<br>0.052 | -1 | b14(dA)x3,<br>z3(dA)d14,<br>d3(dA)z14,<br>w14(dA)a3,<br>a14(dA)w3,<br>c14(dA)y3,<br>y3(dA)c14,<br>x3(dA)b14,<br>x2a15 + 1H,<br>c3(dA)y14,                                                                                                                                                                                                                                                                                                                                  | J1<br>0 |

|            |       |                                                                                             |            |            |    |  |                                                                                                                                                                                                              |         |
|------------|-------|---------------------------------------------------------------------------------------------|------------|------------|----|--|--------------------------------------------------------------------------------------------------------------------------------------------------------------------------------------------------------------|---------|
| 356.904043 | 300.9 |                                                                                             |            |            |    |  | a15(dG)x2,<br>b3(dA)x14,<br>z2(dG)c15,<br>a3(dA)w14,<br>c15(dG)z2,<br>x14(dA)b3,<br>y14(dA)c3,<br>z14(dA)d3,<br>w3(dA)a14,<br>d14(dA)z3                                                                      |         |
| 364.037375 | 21.8  | C <sub>11</sub> H <sub>16</sub> N <sub>3</sub> O <sub>7</sub> PS                            | 364.037382 | 0.019      | -1 |  | b2(dC)w15 +<br>2H, d2(dC)y15<br>+ 2H, y15d2 +<br>2H, w15b2 +<br>1H, w1                                                                                                                                       | J1<br>1 |
| 372.017416 | 32.2  | C <sub>11</sub> H <sub>12</sub> N <sub>5</sub> O <sub>6</sub> PS                            | 372.017315 | -<br>0.270 | -1 |  | z2(dG)d15,<br>w2(dG)a15, d1<br>- H2O,<br>y3(dA)d14,<br>d3(dA)y14,<br>y14(dA)d3,<br>b3(dA)w14,<br>x2(dG)b15,<br>d15(dG)z2,<br>y2(dG)c15,<br>b14(dA)w3,<br>c15(dG)y2,<br>b15(dG)x2,<br>a15(dG)w2,<br>d14(dA)y3 | J1<br>2 |
| 390.027876 | 31.2  | C <sub>11</sub> H <sub>14</sub> N <sub>5</sub> O <sub>7</sub> PS                            | 390.027880 | 0.010      | -1 |  | d15(dG)y2 +<br>2H, w2b15 +<br>1H, y2d15 +<br>2H, b15(dG)w2<br>+ 2H, d1                                                                                                                                       | J1<br>3 |
| 397.998234 | 15.2  |                                                                                             |            |            |    |  |                                                                                                                                                                                                              |         |
| 407.993867 | 40.9  |                                                                                             |            |            |    |  |                                                                                                                                                                                                              |         |
| 413.975373 | 13.0  | C <sub>10</sub> H <sub>15</sub> N <sub>3</sub> O <sub>7</sub> P <sub>2</sub> S <sub>2</sub> | 413.975390 | 0.041      | -1 |  | x4(mC)d13 +<br>1H, x11(mC)d6<br>+ 1H,<br>w4(mC)c13,<br>w11(mC)c6,<br>d13(mC)x4,<br>c13(mC)w4,<br>d6(mC)x11,<br>c6(mC)w11                                                                                     | J1<br>4 |
| 414.959452 | 50.4  |                                                                                             |            |            |    |  |                                                                                                                                                                                                              |         |
| 416.841900 | 39.4  |                                                                                             |            |            |    |  |                                                                                                                                                                                                              |         |
| 418.904458 | 89.8  |                                                                                             |            |            |    |  |                                                                                                                                                                                                              |         |
| 423.971034 | 23.3  | C <sub>10</sub> H <sub>13</sub> N <sub>5</sub> O <sub>6</sub> P <sub>2</sub> S <sub>2</sub> | 423.970973 | -<br>0.145 | -1 |  | d9(A)x8,<br>c9(A)w8,<br>c12(G)x5,<br>c8(A)w9,<br>x5(G)c12 + 1H,<br>x6(A)d11 + 1H,<br>d8(A)x9,<br>c11(A)w6,<br>x8(A)d9 + 1H,<br>d11(A)x6,<br>w9(A)c8,<br>w6(A)c11,<br>x9(A)d8 + 1H,<br>w8(A)c9                | J1<br>5 |
| 432.970120 | 15.9  | C <sub>10</sub> H <sub>16</sub> N <sub>2</sub> O <sub>9</sub> P <sub>2</sub> S <sub>2</sub> | 432.969970 | -<br>0.346 | -1 |  | d7(T)w10 + 2H,<br>w7(T)d10 + 2H,<br>d10(T)w7 + 2H,<br>d5(T)w12 + 2H,<br>w13(T)d4 + 2H,<br>d4(T)w13 + 2H,<br>w10(T)d7 + 2H,<br>w12(T)d5 + 2H                                                                  | J1<br>6 |

|            |       |                                                                                                   |            |       |    |                                                                                                                             |         |
|------------|-------|---------------------------------------------------------------------------------------------------|------------|-------|----|-----------------------------------------------------------------------------------------------------------------------------|---------|
| 441.970371 | 16.2  | C <sub>11</sub> H <sub>15</sub> N <sub>3</sub> O <sub>8</sub> P <sub>2</sub> S <sub>2</sub>       | 441.970304 | -     | -1 | w15c2, x15d2 + 1H, d2(dC)x15, c2(dC)w15                                                                                     | J1<br>7 |
| 451.965933 | 24.5  | C <sub>11</sub> H <sub>13</sub> N <sub>5</sub> O <sub>7</sub> P <sub>2</sub> S <sub>2</sub>       | 451.965888 | -     | -1 | w14(dA)c3, w3(dA)c14, x3(dA)d14 + 1H, x14(dA)d3 + 1H, c15(dG)x2, d14(dA)x3, c14(dA)w3, x2(dG)c15 + 1H, d3(dA)x14, c3(dA)w14 | J1<br>8 |
| 467.960836 | 23.9  | C <sub>11</sub> H <sub>13</sub> N <sub>5</sub> O <sub>8</sub> P <sub>2</sub> S <sub>2</sub>       | 467.960802 | -     | -1 | x2d15 + 1H, d3(dA)w14, d14(dA)w3, c15(dG)w2, d15(dG)x2, w2(dG)c15, w3(dA)d14, w14(dA)d3                                     | J1<br>9 |
| 469.046360 | 24.6  | C <sub>103</sub> H <sub>127</sub> N <sub>40</sub> O <sub>50</sub> P <sub>9</sub> S <sub>9</sub>   | 469.046290 | -     | -7 | y10                                                                                                                         |         |
| 470.054270 | 17.9  | C <sub>16</sub> H <sub>18</sub> N <sub>5</sub> O <sub>8</sub> PS                                  | 470.054094 | -     | -1 | z2 - B(dC) - OCH2                                                                                                           |         |
| 478.833365 | 14.0  |                                                                                                   |            |       |    |                                                                                                                             |         |
| 512.996253 | 51.0  |                                                                                                   |            |       |    |                                                                                                                             |         |
| 522.007742 | 13.4  |                                                                                                   |            |       |    |                                                                                                                             |         |
| 545.534472 | 13.6  | C <sub>33</sub> H <sub>38</sub> N <sub>13</sub> O <sub>18</sub> P <sub>3</sub> S <sub>3</sub>     | 545.534362 | -     | -2 | w3 - 2H, d3 - 2H                                                                                                            |         |
| 546.542400 | 12.4  | C <sub>33</sub> H <sub>40</sub> N <sub>13</sub> O <sub>18</sub> P <sub>3</sub> S <sub>3</sub>     | 546.542187 | -     | -2 | w3, d3                                                                                                                      |         |
| 585.381633 | 13.2  | C <sub>53</sub> H <sub>66</sub> N <sub>21</sub> O <sub>28</sub> P <sub>5</sub> S <sub>5</sub>     | 585.381984 | 0.600 | -3 | w5                                                                                                                          |         |
| 586.555417 | 5.2   | C <sub>38</sub> H <sub>44</sub> N <sub>13</sub> O <sub>19</sub> P <sub>3</sub> S <sub>3</sub>     | 586.555294 | -     | -2 | z4 - B(dC) - 2H, y4 - B(T) - NH3, b4 - B(T) - H2O                                                                           |         |
| 601.049458 | 16.1  | C <sub>73</sub> H <sub>91</sub> N <sub>28</sub> O <sub>38</sub> P <sub>7</sub> S <sub>7</sub>     | 601.049158 | -     | -4 | w7                                                                                                                          |         |
| 638.055123 | 27.1  |                                                                                                   |            |       |    |                                                                                                                             |         |
| 641.118702 | 21.0  | C <sub>22</sub> H <sub>27</sub> N <sub>8</sub> O <sub>11</sub> PS                                 | 641.118485 | -     | -1 | b2, y2                                                                                                                      |         |
| 645.737182 | 14.0  | C <sub>63</sub> H <sub>77</sub> N <sub>20</sub> O <sub>32</sub> P <sub>5</sub> S <sub>5</sub>     | 645.736204 | -     | -3 | b6 - H2O, a6 - 2H                                                                                                           |         |
| 647.804911 | 23.9  | C <sub>161</sub> H <sub>199</sub> N <sub>55</sub> O <sub>84</sub> P <sub>15</sub> S <sub>15</sub> | 647.803546 | -     | -8 | M - 8H - 4H - dA                                                                                                            |         |
| 657.062398 | 14.4  | C <sub>144</sub> H <sub>179</sub> N <sub>52</sub> O <sub>72</sub> P <sub>13</sub> S <sub>13</sub> | 657.062754 | 0.542 | -7 | y14, b14                                                                                                                    |         |
| 663.061700 | 12.1  |                                                                                                   |            |       |    |                                                                                                                             |         |
| 664.686358 | 947.3 | C <sub>166</sub> H <sub>204</sub> N <sub>60</sub> O <sub>84</sub> P <sub>15</sub> S <sub>15</sub> | 664.685358 | -     | -8 | M - 8H - 4H                                                                                                                 |         |
| 672.049124 | 10.5  | C <sub>103</sub> H <sub>123</sub> N <sub>40</sub> O <sub>51</sub> P <sub>10</sub> S <sub>10</sub> | 672.049607 | 0.719 | -5 | x10 - 4H                                                                                                                    |         |
| 673.057134 | 10.8  | C <sub>103</sub> H <sub>128</sub> N <sub>40</sub> O <sub>51</sub> P <sub>10</sub> S <sub>10</sub> | 673.057432 | 0.443 | -5 | x10 + 1H                                                                                                                    |         |
| 676.256468 | 33.9  | C <sub>103</sub> H <sub>128</sub> N <sub>40</sub> O <sub>52</sub> P <sub>10</sub> S <sub>10</sub> | 676.256415 | -     | -5 | w10                                                                                                                         |         |
| 683.558773 | 18.4  | C <sub>128</sub> H <sub>159</sub> N <sub>44</sub> O <sub>65</sub> P <sub>12</sub> S <sub>12</sub> | 683.559204 | 0.630 | -6 | a13 - B(mC)                                                                                                                 |         |
| 689.559898 | 22.4  |                                                                                                   |            |       |    |                                                                                                                             |         |
| 695.060777 | 8.1   | C <sub>63</sub> H <sub>78</sub> N <sub>26</sub> O <sub>32</sub> P <sub>6</sub> S <sub>6</sub>     | 695.060238 | -     | -3 | w6                                                                                                                          |         |
| 703.074287 | 26.9  |                                                                                                   |            |       |    |                                                                                                                             |         |
| 706.061369 | 54.4  | C <sub>43</sub> H <sub>54</sub> N <sub>16</sub> O <sub>23</sub> P <sub>4</sub> S <sub>4</sub>     | 706.061776 | 0.576 | -2 | w4                                                                                                                          |         |
| 712.669882 | 12.8  |                                                                                                   |            |       |    |                                                                                                                             |         |

|            |      |                                                                                                               |            |       |    |                                                     |
|------------|------|---------------------------------------------------------------------------------------------------------------|------------|-------|----|-----------------------------------------------------|
| 719.051272 | 20.1 | C <sub>22</sub> H <sub>26</sub> N <sub>8</sub> O <sub>12</sub> P <sub>2</sub> S <sub>2</sub>                  | 719.051408 | 0.190 | -1 | d2 - H2O, w2 - H2O                                  |
| 728.573632 | 10.2 | C <sub>93</sub> H <sub>114</sub> N <sub>32</sub> O <sub>46</sub> P <sub>8</sub> S <sub>8</sub>                | 728.573513 | -     | -4 | b9 - H2O, a9 - 2H                                   |
| 737.062121 | 16.5 | C <sub>22</sub> H <sub>28</sub> N <sub>8</sub> O <sub>13</sub> P <sub>2</sub> S <sub>2</sub>                  | 737.061973 | -     | -1 | w2, d2                                              |
| 740.064886 | 6.8  | C <sub>113</sub> H <sub>142</sub> N <sub>43</sub> O <sub>57</sub> P <sub>11</sub> S <sub>1</sub>              | 740.064251 | -     | -5 | w11                                                 |
| 740.492052 | 70.3 | <sup>1</sup> C <sub>161</sub> H <sub>199</sub> N <sub>55</sub> O <sub>84</sub> P <sub>15</sub> S <sub>1</sub> | 740.490806 | -     | -7 | M - 7H - 4H - dA                                    |
| 752.074736 | 40.1 | <sup>5</sup> C <sub>48</sub> H <sub>62</sub> N <sub>12</sub> O <sub>28</sub> P <sub>4</sub> S <sub>4</sub>    | 752.074215 | -     | -2 | b5 - B(dA) + 2H                                     |
| 754.463203 | 11.0 | <sup>1</sup> C <sub>118</sub> H <sub>146</sub> N <sub>39</sub> O <sub>61</sub> P <sub>11</sub> S <sub>1</sub> | 754.463983 | 1.034 | -5 | y12 - B(A) - NH3, b12 - B(G) - 2H, b12 - B(A) - H2O |
| 759.784521 | 80.0 | <sup>5</sup> C <sub>166</sub> H <sub>204</sub> N <sub>60</sub> O <sub>84</sub> P <sub>15</sub> S <sub>1</sub> | 759.784305 | -     | -7 | M - 7H - 4H                                         |
| 763.750391 | 13.2 | <sup>5</sup> C <sub>73</sub> H <sub>88</sub> N <sub>28</sub> O <sub>35</sub> P <sub>6</sub> S <sub>6</sub>    | 763.749952 | -     | -3 | z7 - 2H, y7 - H2O                                   |
| 781.274362 | 36.5 | <sup>1</sup> C <sub>123</sub> H <sub>152</sub> N <sub>45</sub> O <sub>60</sub> P <sub>11</sub> S <sub>1</sub> | 781.278079 | 4.758 | -5 | z12 - 2H, y12 - H2O                                 |
| 801.734371 | 17.5 | <sup>1</sup> C <sub>73</sub> H <sub>91</sub> N <sub>28</sub> O <sub>38</sub> P <sub>7</sub> S <sub>7</sub>    | 801.734636 | 0.330 | -3 | w7                                                  |
| 804.069509 | 9.6  | <sup>2</sup> C <sub>123</sub> H <sub>155</sub> N <sub>45</sub> O <sub>63</sub> P <sub>12</sub> S <sub>1</sub> | 804.068889 | -     | -5 | w12                                                 |
| 808.327478 | 25.6 |                                                                                                               |            | 0.771 |    |                                                     |
| 809.589322 | 25.1 | C <sub>53</sub> H <sub>63</sub> N <sub>17</sub> O <sub>27</sub> P <sub>4</sub> S <sub>4</sub>                 | 809.588355 | -     | -2 | b5 - H2O, a5 - 2H                                   |
| 817.010652 | 23.2 |                                                                                                               |            | 1.195 |    |                                                     |
| 821.600798 | 8.4  | C <sub>53</sub> H <sub>63</sub> N <sub>21</sub> O <sub>25</sub> P <sub>4</sub> S <sub>4</sub>                 | 821.599588 | -     | -2 | y5 - H2O, z5 - 2H                                   |
| 830.605343 | 5.9  | C <sub>53</sub> H <sub>65</sub> N <sub>21</sub> O <sub>26</sub> P <sub>4</sub> S <sub>4</sub>                 | 830.604871 | -     | -2 | y5                                                  |
| 842.030972 | 26.5 |                                                                                                               |            | 0.568 |    |                                                     |
| 845.483803 | 10.6 |                                                                                                               |            |       |    |                                                     |
| 849.571789 | 9.5  | <sup>0</sup> C <sub>107</sub> H <sub>132</sub> N <sub>34</sub> O <sub>55</sub> P <sub>10</sub> S <sub>1</sub> | 849.571738 | -     | -4 | a11 - B(dG) - CH3                                   |
| 861.753172 | 14.3 |                                                                                                               |            | 0.060 |    |                                                     |
| 864.073179 | 20.0 | <sup>5</sup> C <sub>161</sub> H <sub>199</sub> N <sub>55</sub> O <sub>84</sub> P <sub>15</sub> S <sub>1</sub> | 864.073820 | 0.742 | -6 | M - 6H - 4H - dA                                    |
| 866.566024 | 7.2  | <sup>5</sup> C <sub>53</sub> H <sub>66</sub> N <sub>17</sub> O <sub>30</sub> P <sub>5</sub> S <sub>5</sub>    | 866.565381 | -     | -2 | d5                                                  |
| 873.428024 | 9.4  | C <sub>83</sub> H <sub>100</sub> N <sub>33</sub> O <sub>39</sub> P <sub>7</sub> S <sub>7</sub>                | 873.428206 | 0.742 | -3 | z8 - 2H, y8 - H2O                                   |
| 878.576005 | 15.9 | C <sub>53</sub> H <sub>66</sub> N <sub>21</sub> O <sub>28</sub> P <sub>5</sub> S <sub>5</sub>                 | 878.576614 | 0.693 | -2 | w5                                                  |
| 886.581952 | 104. | <sup>1</sup> C <sub>166</sub> H <sub>204</sub> N <sub>60</sub> O <sub>84</sub> P <sub>15</sub> S <sub>1</sub> | 886.582902 | 1.072 | -6 | M - 6H - 4H                                         |
| 906.578071 | 7.7  | <sup>5</sup> C <sub>58</sub> H <sub>70</sub> N <sub>17</sub> O <sub>31</sub> P <sub>5</sub> S <sub>5</sub>    | 906.578488 | 0.460 | -2 | b6 - B(mC) - H2O, b6 - B(T) - NH3                   |
| 911.747433 | 15.0 | C <sub>83</sub> H <sub>104</sub> N <sub>33</sub> O <sub>42</sub> P <sub>8</sub> S <sub>8</sub>                | 911.748832 | 1.535 | -3 | w8 + 1H                                             |
| 926.749561 | 5.2  | C <sub>88</sub> H <sub>109</sub> N <sub>27</sub> O <sub>46</sub> P <sub>8</sub> S <sub>8</sub>                | 926.748945 | -     | -3 | b9 - B(A) - H2O, b9 - B(dG) - 2H                    |
| 968.604133 | 20.1 |                                                                                                               |            | 0.665 |    |                                                     |
| 969.108598 | 17.6 | C <sub>63</sub> H <sub>77</sub> N <sub>20</sub> O <sub>32</sub> P <sub>5</sub> S <sub>5</sub>                 | 969.107944 | -     | -2 | a6 - 2H, b6 - H2O                                   |
| 971.766255 | 13.2 |                                                                                                               |            | 0.675 |    |                                                     |
| 972.101125 | 13.5 |                                                                                                               |            |       |    |                                                     |
| 976.592047 | 9.2  | <sup>1</sup> C <sub>123</sub> H <sub>149</sub> N <sub>44</sub> O <sub>61</sub> P <sub>11</sub> S <sub>1</sub> | 976.591509 | -     | -4 | a12 - 4H                                            |
| 977.085164 | 19.1 |                                                                                                               |            | 0.551 |    |                                                     |
| 983.105901 | 9.1  | C <sub>93</sub> H <sub>112</sub> N <sub>38</sub> O <sub>43</sub> P <sub>8</sub> S <sub>8</sub>                | 983.106460 | 0.568 | -3 | z9 - 2H, y9 -                                       |

|            |      |                                  |            |       |    |                                  |
|------------|------|----------------------------------|------------|-------|----|----------------------------------|
| 986.117343 | 8.7  | $C_{63}H_{75}N_{26}O_{29}P_5S_5$ | 986.116969 | -     | -2 | H2O                              |
|            |      |                                  |            | 0.379 |    | y6 - H2O, z6 - 2H                |
| 995.122638 | 15.1 | $C_{63}H_{77}N_{26}O_{30}P_5S_5$ | 995.122252 | -     | -2 | y6                               |
|            |      |                                  |            | 0.388 |    |                                  |
| 998.148057 | 17.6 | $C_{33}H_{39}N_{13}O_{16}P_2S_2$ | 998.148162 | 0.105 | -1 | b3, y3                           |
| 1023.07981 | 10.5 |                                  |            |       |    |                                  |
| 1          |      |                                  |            |       |    |                                  |
| 1037.68925 | 9.0  |                                  |            |       |    |                                  |
| 6          |      |                                  |            |       |    |                                  |
| 1043.09456 | 5.1  | $C_{63}H_{78}N_{26}O_{32}P_6S_6$ | 1043.09399 | -     | -2 | w6                               |
| 9          |      |                                  | 5          | 0.550 |    |                                  |
| 1060.10369 | 26.7 |                                  |            |       |    |                                  |
| 7          |      |                                  |            |       |    |                                  |
| 1061.10687 | 9.4  |                                  |            |       |    |                                  |
| 7          |      |                                  |            |       |    |                                  |
| 1094.09091 | 42.6 | $C_{33}H_{40}N_{13}O_{18}P_3S_3$ | 1094.09165 | 0.676 | -1 | w3, d3                           |
| 1          |      |                                  | 0          |       |    |                                  |
| 1128.61629 | 10.3 |                                  |            |       |    |                                  |
| 8          |      |                                  |            |       |    |                                  |
| 1129.11959 | 23.7 |                                  |            |       |    |                                  |
| 3          |      |                                  |            |       |    |                                  |
| 1226.10927 | 9.7  | $C_{78}H_{97}N_{22}O_{42}P_7S_7$ | 1226.10967 | 0.329 | -2 | b8 - B(dG) - 2H, b8 - B(A) - H2O |
| 1          |      |                                  | 5          |       |    |                                  |
| 1300.16035 | 6.7  | $C_{43}H_{50}N_{15}O_{21}P_3S_3$ | 1300.16079 | 0.339 | -1 | y4 - NH3, a4 - 2H, b4 - H2O      |
| 1          |      |                                  | 2          |       |    |                                  |
| 1317.18722 | 18.7 | $C_{43}H_{53}N_{16}O_{21}P_3S_3$ | 1317.18734 | 0.092 | -1 | y4                               |
| 0          |      |                                  | 1          |       |    |                                  |
| 1318.19061 | 8.5  |                                  |            |       |    |                                  |
| 9          |      |                                  |            |       |    |                                  |
| 1413.13066 | 8.1  | $C_{43}H_{54}N_{16}O_{23}P_4S_4$ | 1413.13082 | 0.117 | -1 | w4                               |
| 3          |      |                                  | 8          |       |    |                                  |
|            |      |                                  | Abs mean   | 0.654 |    |                                  |
|            |      |                                  | error      |       |    |                                  |
|            |      |                                  | Abs mean   | 0.771 |    |                                  |
|            |      |                                  | std dev    |       |    |                                  |

---



**Table S5 showing peak list, signal-to-noise ratio (S/N), elemental composition, and possible assignments with mass errors (ppm) of the [M-8H]<sup>8-</sup> danvatirsen by EDD MS/MS, internal fragments marked by character (J), base losses are shown inside the parenthesis.**

| Measured <i>mz</i> | S/N  | Elemental Composition                                            | Theoretical <i>mz</i> | Error (ppm) | Charge | Assignment                                                                                                                                                                                                                                                                                                                                                                                                                                                                                       |        |
|--------------------|------|------------------------------------------------------------------|-----------------------|-------------|--------|--------------------------------------------------------------------------------------------------------------------------------------------------------------------------------------------------------------------------------------------------------------------------------------------------------------------------------------------------------------------------------------------------------------------------------------------------------------------------------------------------|--------|
| 318.008280         | 90.6 | C <sub>10</sub> H <sub>12</sub> N <sub>2</sub> O <sub>6</sub> PS | 318.008093            | -0.590      | -1     | y4d13 - NH <sub>2</sub> ,<br>y5(T)c12 - 1H,<br>z5(T)d12 - 1H,<br>x5(T)b12 - 1H,<br>w4b13 - NH <sub>3</sub> ,<br>w7(T)b10 -<br>H <sub>2</sub> O, d4(T)z13<br>- 1H, d6(T)z11 -<br>1H, c4(T)y13 -<br>1H, c5(T)y12 -<br>1H, d5(T)z12 -<br>1H, a6(T)w11 -<br>1H, b6(T)x11 -<br>1H, w5(T)a12 -<br>1H, b4(T)x13 -<br>1H, c6(T)y11 -<br>1H, a5(T)w12 -<br>1H, x7(T)b10 -<br>1H, a4(T)w13 -<br>1H, w7(T)a10 -<br>1H, w5(T)b12 -<br>H <sub>2</sub> O, y7(T)c10<br>- 1H, z7(T)d10 -<br>1H, b5(T)x12 -<br>1H | J<br>1 |
| 319.016114         | 99.6 | C <sub>10</sub> H <sub>13</sub> N <sub>2</sub> O <sub>6</sub> PS | 319.015918            | -0.610      | -1     | a5(T)w12,<br>a4(T)w13,<br>b4(T)x13,<br>c4(T)y13,<br>d4(T)z13,<br>w4b13 - NH <sub>2</sub> ,<br>z5(T)d12,<br>b5(T)x12,<br>x5(T)b12,<br>y5(T)c12,<br>d6(T)z11,<br>c5(T)y12,<br>w7(T)a10,<br>d5(T)z12,<br>a6(T)w11,<br>c6(T)y11,<br>b6(T)x11,<br>y7(T)c10,<br>z7(T)d10,<br>w5(T)a12,<br>x7(T)b10                                                                                                                                                                                                     | J<br>2 |
| 327.019835         | 17.7 | C <sub>10</sub> H <sub>11</sub> N <sub>5</sub> O <sub>4</sub> PS | 327.019661            | -0.530      | -1     | w8b9 - H <sub>2</sub> O,<br>x8(A)b9 - 1H,<br>z6(G)c11 - 1H,<br>c8(G)z9 - 1H,<br>a8(G)x9 - 1H,<br>y8(A)c9 - 1H,<br>z8(A)d9 - 1H,<br>c7(G)z10 - 1H,<br>a7(G)x10 - 1H,<br>x6a11, b9(A)x8<br>- 1H, w8(A)a9 -<br>1H, a9(A)w8 -<br>1H                                                                                                                                                                                                                                                                  | J<br>3 |
| 328.027641         | 18.4 | C <sub>10</sub> H <sub>12</sub> N <sub>5</sub> O <sub>4</sub> PS | 328.027486            | -0.470      | -1     | z6(G)c11,<br>y8(A)c9,<br>c8(G)z9,<br>a8(G)x9,<br>c7(G)z10,<br>a7(G)x10,                                                                                                                                                                                                                                                                                                                                                                                                                          | J<br>4 |

|            |       |                                                                                               |            |       |    |                                                                                                                                                                                                                                                                                 |        |
|------------|-------|-----------------------------------------------------------------------------------------------|------------|-------|----|---------------------------------------------------------------------------------------------------------------------------------------------------------------------------------------------------------------------------------------------------------------------------------|--------|
| 328.027641 | 18.4  | C <sub>10</sub> H <sub>11</sub> N <sub>5</sub> O <sub>4</sub> PS                              | 328.027486 | 0.470 | -1 | a9(A)w8,<br>x8(A)b9,<br>w8(A)a9,<br>b9(A)x8,<br>z8(A)d9                                                                                                                                                                                                                         |        |
| 343.014692 | 115.7 | C <sub>10</sub> H <sub>11</sub> N <sub>5</sub> O <sub>5</sub> PS                              | 343.014575 | -     | -1 |                                                                                                                                                                                                                                                                                 | J      |
|            |       |                                                                                               |            | 0.340 |    | w6b11 - H2O,<br>d7(G)z10 - 1H,<br>c7(G)y10 - 1H,<br>z6(G)d11 - 1H,<br>b7(G)x10 - 1H,<br>a7(G)w10 - 1H,<br>d8(G)z9 - 1H,<br>x6(G)b11 - 1H,<br>y6(G)c11 - 1H,<br>w8b9 - 2H,<br>y8(A)d9 - 1H,<br>w6(G)a11 - 1H,<br>a8(G)w9 - 1H,<br>b9(A)w8 - 1H,<br>b8(G)x9 - 1H,<br>c8(G)y9 - 1H | 5      |
| 344.022520 | 58.5  | C <sub>10</sub> H <sub>12</sub> N <sub>5</sub> O <sub>5</sub> PS                              | 344.022400 | -     | -1 | b9(A)w8,<br>w6(G)a11,<br>d8(G)z9,<br>c8(G)y9,<br>b8(G)x9,<br>a8(G)w9,<br>c7(G)y10,<br>b7(G)x10,<br>d7(G)z10,<br>a7(G)w10,<br>x6(G)b11,<br>y8(A)d9,<br>y6(G)c11,<br>z6(G)d11,<br>w8b9 - 1H                                                                                       | J<br>6 |
| 344.022520 | 58.5  | C <sub>10</sub> H <sub>11</sub> N <sub>5</sub> O <sub>5</sub> PS                              | 344.022400 | 0.350 | -1 |                                                                                                                                                                                                                                                                                 |        |
| 361.026609 | 16.0  | C <sub>12</sub> H <sub>14</sub> O <sub>7</sub> N <sub>2</sub> PS                              | 361.026482 | -     | -1 | w1 - NH3, d1 -<br>NH3                                                                                                                                                                                                                                                           |        |
|            |       |                                                                                               |            | 0.350 |    |                                                                                                                                                                                                                                                                                 |        |
| 370.038056 | 21.2  | C <sub>12</sub> H <sub>14</sub> N <sub>5</sub> O <sub>5</sub> PS                              | 370.038050 | -     | -1 | c3(dA)y14,<br>a3(dA)w14,<br>w3(dA)a14,<br>y3(dA)c14,<br>z2(dG)c15,<br>b3(dA)x14,<br>z3(dA)d14,<br>x3(dA)b14,<br>d3(dA)z14                                                                                                                                                       | J<br>7 |
|            |       |                                                                                               |            | 0.020 |    |                                                                                                                                                                                                                                                                                 |        |
| 370.038056 | 21.2  | C <sub>12</sub> H <sub>13</sub> N <sub>5</sub> O <sub>5</sub> PS                              | 370.038050 | 0.020 | -1 |                                                                                                                                                                                                                                                                                 |        |
| 378.053049 | 31.4  | C <sub>12</sub> H <sub>17</sub> O <sub>7</sub> N <sub>3</sub> PS                              | 378.053032 | -     | -1 | d1, w1                                                                                                                                                                                                                                                                          |        |
|            |       |                                                                                               |            | 0.040 |    |                                                                                                                                                                                                                                                                                 |        |
| 398.982245 | 31.3  | C <sub>9</sub> H <sub>7</sub> N <sub>9</sub> O <sub>4</sub> P <sub>2</sub> S                  | 398.982243 | 0.010 | -1 |                                                                                                                                                                                                                                                                                 |        |
| 409.522859 | 60.2  | C <sub>21</sub> H <sub>38</sub> N <sub>4</sub> O <sub>16</sub> P <sub>7</sub>                 | 409.522856 | 0.010 | -2 |                                                                                                                                                                                                                                                                                 |        |
| 414.959337 | 18.1  | C <sub>8</sub> H <sub>13</sub> N <sub>5</sub> O <sub>5</sub> P <sub>4</sub> S                 | 414.959336 | 0.000 | -1 |                                                                                                                                                                                                                                                                                 |        |
| 414.959337 | 18.1  | C <sub>10</sub> H <sub>14</sub> N <sub>2</sub> O <sub>8</sub> P <sub>2</sub> S <sub>2</sub>   | 414.959405 | 0.160 | -1 | c6(T)w11,<br>d4(T)x13,<br>d6(T)x11,<br>c4(T)w13,<br>w7(T)c10,<br>c5(T)w12,<br>d5(T)x12,<br>w5(T)c12                                                                                                                                                                             | J<br>8 |
| 423.988646 | 18.2  | C <sub>7</sub> H <sub>17</sub> N <sub>6</sub> O <sub>5</sub> PS <sub>4</sub>                  | 423.988638 | 0.020 | -1 |                                                                                                                                                                                                                                                                                 |        |
| 432.969837 | 23.6  | C <sub>21</sub> H <sub>10</sub> N <sub>2</sub> OPS <sub>3</sub>                               | 432.969837 | 0.000 | -1 |                                                                                                                                                                                                                                                                                 |        |
| 450.004224 | 22.9  | C <sub>7</sub> H <sub>19</sub> N <sub>9</sub> O <sub>2</sub> P <sub>3</sub> S <sub>3</sub>    | 450.004219 | 0.010 | -1 |                                                                                                                                                                                                                                                                                 |        |
| 457.976441 | 6.2   | C <sub>9</sub> H <sub>8</sub> N <sub>12</sub> O <sub>3</sub> P <sub>2</sub> S <sub>2</sub>    | 457.976447 | 0.010 | -2 |                                                                                                                                                                                                                                                                                 |        |
| 472.094704 | 15.8  | C <sub>8</sub> H <sub>7</sub> N <sub>23</sub> OP                                              | 472.094703 | 0.000 | -1 |                                                                                                                                                                                                                                                                                 |        |
| 484.387762 | 26.4  | C <sub>46</sub> H <sub>57</sub> N <sub>16</sub> O <sub>23</sub> P <sub>4</sub> S <sub>4</sub> | 484.387742 | -     | -3 | w4                                                                                                                                                                                                                                                                              |        |
|            |       |                                                                                               |            | 0.040 |    |                                                                                                                                                                                                                                                                                 |        |
| 491.530627 | 6.6   | C <sub>33</sub> H <sub>67</sub> N <sub>2</sub>                                                | 491.530974 | 0.710 | -2 |                                                                                                                                                                                                                                                                                 |        |





|            |      |                                                                                                  |            |       |    |                            |
|------------|------|--------------------------------------------------------------------------------------------------|------------|-------|----|----------------------------|
| 905.589165 | 11.2 | C <sub>32</sub> H <sub>78</sub> N <sub>18</sub> O <sub>10</sub> P                                | 905.589141 | 0.030 | -1 |                            |
| 908.419775 | 2.4  | C <sub>84</sub> H <sub>105</sub> N <sub>30</sub> O <sub>43</sub> P <sub>8</sub> S <sub>8</sub>   | 908.421163 | 1.530 | -3 | w8 - OC2H2                 |
| 909.341954 | 16.2 | C <sub>116</sub> H <sub>139</sub> N <sub>38</sub> O <sub>59</sub> P <sub>10</sub> S <sub>1</sub> | 909.341382 | -     | -4 | a11 - 5H                   |
|            |      |                                                                                                  |            | 0.630 |    |                            |
| 915.348509 | 8.6  | C <sub>116</sub> H <sub>139</sub> N <sub>42</sub> O <sub>57</sub> P <sub>10</sub> S <sub>1</sub> | 915.346999 | -     | -4 | z11 - 5H                   |
|            |      |                                                                                                  |            | 1.650 |    |                            |
| 922.425147 | 28.0 | C <sub>86</sub> H <sub>107</sub> N <sub>30</sub> O <sub>44</sub> P <sub>8</sub> S <sub>8</sub>   | 922.424867 | -     | -3 | w8                         |
|            |      |                                                                                                  |            | 0.300 |    |                            |
| 943.836734 | 9.0  | C <sub>116</sub> H <sub>142</sub> N <sub>42</sub> O <sub>60</sub> P <sub>11</sub> S <sub>1</sub> | 943.835512 | -     | -4 | w11 - 5H                   |
|            |      |                                                                                                  |            | 1.290 |    |                            |
| 977.618677 | 15.1 | C <sub>66</sub> H <sub>80</sub> N <sub>16</sub> O <sub>34</sub> P <sub>5</sub> S <sub>5</sub>    | 977.616548 | -     | -2 | a6 - 3H                    |
|            |      |                                                                                                  |            | 2.180 |    |                            |
| 989.347530 | 13.2 | C <sub>126</sub> H <sub>152</sub> N <sub>40</sub> O <sub>65</sub> P <sub>11</sub> S <sub>1</sub> | 989.347181 | -     | -4 | a12 - 5H                   |
|            |      |                                                                                                  |            | 0.350 |    |                            |
| 991.107124 | 30.9 | C <sub>96</sub> H <sub>115</sub> N <sub>31</sub> O <sub>48</sub> P <sub>8</sub> S <sub>8</sub>   | 991.106645 | -     | -3 | a9 - 4H                    |
|            |      |                                                                                                  |            | 0.480 |    |                            |
| 991.442065 | 40.5 | C <sub>96</sub> H <sub>116</sub> N <sub>31</sub> O <sub>48</sub> P <sub>8</sub> S <sub>8</sub>   | 991.442404 | 0.340 | -3 | b9 - H2O, a9               |
| 999.448856 | 11.1 | C <sub>96</sub> H <sub>116</sub> N <sub>35</sub> O <sub>46</sub> P <sub>8</sub> S <sub>8</sub>   | 999.449893 | 1.040 | -3 | y9 - H2O, z9               |
| 1002.13093 | 12.8 | C <sub>66</sub> H <sub>79</sub> N <sub>23</sub> O <sub>31</sub> P <sub>5</sub> S <sub>5</sub>    | 1002.13102 | 0.090 | -2 | z6 - 3H                    |
| 6          |      |                                                                                                  | 2          |       |    |                            |
| 1037.10043 | 9.8  | C <sub>96</sub> H <sub>118</sub> N <sub>35</sub> O <sub>49</sub> P <sub>9</sub> S <sub>9</sub>   | 1037.09881 | -     | -3 | w9 - 4H                    |
| 0          |      |                                                                                                  | 8          | 1.550 |    |                            |
| 1040.19583 | 3.0  | C <sub>36</sub> H <sub>44</sub> O <sub>16</sub> N <sub>13</sub> P <sub>2</sub> S <sub>2</sub>    | 1040.19566 | -     | -1 | y3                         |
| 6          |      |                                                                                                  | 1          | 0.170 |    |                            |
| 1059.61267 | 9.1  | C <sub>66</sub> H <sub>83</sub> N <sub>23</sub> O <sub>34</sub> P <sub>6</sub> S <sub>6</sub>    | 1059.61196 | -     | -2 | w6                         |
| 1          |      |                                                                                                  | 1          | 0.670 |    |                            |
| 1075.11034 | 6.3  | C <sub>71</sub> H <sub>88</sub> N <sub>16</sub> O <sub>38</sub> P <sub>6</sub> S <sub>6</sub>    | 1075.11032 | -     | -2 | b7 - B(G) - H2O, a7 - B(G) |
| 7          |      |                                                                                                  | 0          | 0.030 |    |                            |
| 1136.13861 | 22.5 | C <sub>36</sub> H <sub>45</sub> O <sub>18</sub> N <sub>13</sub> P <sub>3</sub> S <sub>3</sub>    | 1136.13860 | -     | -1 | w3                         |
| 8          |      |                                                                                                  | 0          | 0.020 |    |                            |
| 1150.13424 | 7.4  | C <sub>76</sub> H <sub>92</sub> N <sub>21</sub> O <sub>39</sub> P <sub>6</sub> S <sub>6</sub>    | 1150.13138 | -     | -2 | a7 - 3H                    |
| 3          |      |                                                                                                  | 6          | 2.480 |    |                            |
| 1219.62452 | 12.0 | C <sub>76</sub> H <sub>96</sub> N <sub>25</sub> O <sub>40</sub> P <sub>7</sub> S <sub>7</sub>    | 1219.62355 | -     | -2 | w7                         |
| 2          |      |                                                                                                  | 8          | 0.790 |    |                            |
| 1317.20236 | 9.3  | C <sub>46</sub> H <sub>56</sub> N <sub>12</sub> O <sub>22</sub> P <sub>3</sub> S <sub>3</sub>    | 1317.20181 | -     | -1 | b4 - H2O, a4               |
| 9          |      |                                                                                                  | 0          | 0.420 |    |                            |
|            |      |                                                                                                  | Abs mean   | 0.770 |    |                            |
|            |      |                                                                                                  | error      |       |    |                            |
|            |      |                                                                                                  | Abs mean   | 0.671 |    |                            |
|            |      |                                                                                                  | std dev    |       |    |                            |

**Table S6 showing peak list, signal-to-noise ratio (S/N), elemental composition, and possible assignments with mass errors (ppm) of the [M-8H]<sup>8-</sup> danvatirsen by CID MS/MS, internal fragments marked by character (J), base losses are shown inside the parenthesis.**

| Measured <i>mz</i> | S/N    | Elemental Composition                                                                         | Theoretical <i>mz</i> | Error (ppm) | Charge | Assignment                                                                                                                                                                                                                                                                                   |        |
|--------------------|--------|-----------------------------------------------------------------------------------------------|-----------------------|-------------|--------|----------------------------------------------------------------------------------------------------------------------------------------------------------------------------------------------------------------------------------------------------------------------------------------------|--------|
| 319.016302         | 16.9   | C <sub>10</sub> H <sub>13</sub> N <sub>2</sub> O <sub>6</sub> PS                              | 319.015918            | -1.200      | -1     | a5(T)w12,<br>a4(T)w13,<br>b4(T)x13,<br>c4(T)y13,<br>d4(T)z13,<br>w4b13 - NH <sub>2</sub> ,<br>z5(T)d12,<br>b5(T)x12,<br>x5(T)b12,<br>y5(T)c12,<br>d6(T)z11,<br>c5(T)y12,<br>w7(T)a10,<br>d5(T)z12,<br>a6(T)w11,<br>c6(T)y11,<br>b6(T)x11,<br>y7(T)c10,<br>z7(T)d10,<br>w5(T)a12,<br>x7(T)b10 | J<br>1 |
| 337.026752         | 22.2   | C <sub>5</sub> H <sub>11</sub> N <sub>10</sub> O <sub>2</sub> P <sub>2</sub> S                | 337.026788            | 0.110       | -3     |                                                                                                                                                                                                                                                                                              |        |
| 344.022589         | 97.6   | C <sub>10</sub> H <sub>12</sub> N <sub>5</sub> O <sub>5</sub> PS                              | 344.0224              | -0.550      | -1     | b9(A)w8,<br>w6(G)a11,<br>d8(G)z9,<br>c8(G)y9,<br>b8(G)x9,<br>a8(G)w9,<br>c7(G)y10,<br>b7(G)x10,<br>d7(G)z10,<br>a7(G)w10,<br>x6(G)b11,<br>y8(A)d9,<br>y6(G)c11,<br>z6(G)d11,<br>w8b9 - 1H                                                                                                    | J<br>2 |
| 344.022589         | 97.6   | C <sub>5</sub> H <sub>8</sub> N <sub>13</sub> P <sub>2</sub> S                                | 344.022706            | 0.340       | -1     |                                                                                                                                                                                                                                                                                              |        |
| 359.999701         | 17.0   | C <sub>15</sub> H <sub>6</sub> NO <sub>10</sub>                                               | 359.999719            | 0.050       | -1     |                                                                                                                                                                                                                                                                                              |        |
| 361.026451         | 20.5   | C <sub>12</sub> H <sub>14</sub> O <sub>7</sub> N <sub>2</sub> PS                              | 361.026482            | 0.090       | -1     | w1 - NH <sub>3</sub> , d1 - NH <sub>3</sub>                                                                                                                                                                                                                                                  |        |
| 369.539755         | 1044.1 | C <sub>24</sub> H <sub>31</sub> O <sub>14</sub> N <sub>5</sub> P <sub>2</sub> S <sub>2</sub>  | 369.539757            | 0.010       | -2     | d2                                                                                                                                                                                                                                                                                           |        |
| 370.038087         | 803.4  | C <sub>12</sub> H <sub>14</sub> N <sub>5</sub> O <sub>5</sub> PS                              | 370.03805             | -0.100      | -1     | c3(dA)y14,<br>a3(dA)w14,<br>w3(dA)a14,<br>y3(dA)c14,<br>z2(dG)c15,<br>b3(dA)x14,<br>z3(dA)d14,<br>x3(dA)b14,<br>d3(dA)z14                                                                                                                                                                    | J<br>3 |
| 378.041426         | 19.5   | C <sub>36</sub> H <sub>43</sub> O <sub>18</sub> N <sub>13</sub> P <sub>3</sub> S <sub>3</sub> | 378.041349            | -0.200      | -3     | w3                                                                                                                                                                                                                                                                                           |        |
| 378.053060         | 20.1   | C <sub>12</sub> H <sub>17</sub> O <sub>7</sub> N <sub>3</sub> PS                              | 378.053032            | -0.070      | -1     | d1, w1                                                                                                                                                                                                                                                                                       |        |
| 414.959683         | 143.4  | C <sub>10</sub> H <sub>14</sub> N <sub>2</sub> O <sub>8</sub> P <sub>2</sub> S <sub>2</sub>   | 414.959405            | -0.670      | -1     | c6(T)w11,<br>d4(T)x13,<br>d6(T)x11,<br>c4(T)w13,<br>w7(T)c10,<br>c5(T)w12,<br>d5(T)x12,                                                                                                                                                                                                      | J<br>4 |











|          |       |
|----------|-------|
| Abs mean | 6.545 |
| std dev  |       |

---

**Table S7 showing peak list, signal-to-noise ratio (S/N), elemental composition, and possible assignments with mass errors (ppm) of the [M-8H]<sup>8-</sup> danvatirsen by IRMPD MS/MS, internal fragments marked by character (J), base losses are shown inside the parenthesis.**

| Measured <i>mz</i> | S/N   | Elemental Composition                                                                         | Theoretical <i>mz</i> | Error (ppm) | Charge | Assignment                                                                                                                                                                                                                                                                      |    |
|--------------------|-------|-----------------------------------------------------------------------------------------------|-----------------------|-------------|--------|---------------------------------------------------------------------------------------------------------------------------------------------------------------------------------------------------------------------------------------------------------------------------------|----|
| 319.015936         | 326.8 | C <sub>10</sub> H <sub>13</sub> N <sub>2</sub> O <sub>6</sub> PS                              | 319.015918            | -0.060      | -1     | a5(T)w12,<br>a4(T)w13,<br>b4(T)x13,<br>c4(T)y13,<br>d4(T)z13,<br>w4b13 - NH2,<br>z5(T)d12,<br>b5(T)x12,<br>x5(T)b12,<br>y5(T)c12,<br>d6(T)z11,<br>c5(T)y12,<br>w7(T)a10,<br>d5(T)z12,<br>a6(T)w11,<br>c6(T)y11,<br>b6(T)x11,<br>y7(T)c10,<br>z7(T)d10,<br>w5(T)a12,<br>x7(T)b10 | J1 |
| 344.022388         | 80.3  | C <sub>10</sub> H <sub>12</sub> N <sub>5</sub> O <sub>5</sub> PS                              | 344.022400            | 0.040       | -1     | b9(A)w8,<br>w6(G)a11,<br>d8(G)z9,<br>c8(G)y9,<br>b8(G)x9,<br>a8(G)w9,<br>c7(G)y10,<br>b7(G)x10,<br>d7(G)z10,<br>a7(G)w10,<br>x6(G)b11,<br>y8(A)d9,<br>y6(G)c11,<br>z6(G)d11,<br>w8b9 - 1H                                                                                       | J2 |
| 360.042454         | 57.4  | C <sub>12</sub> H <sub>15</sub> O <sub>6</sub> N <sub>3</sub> PS                              | 360.042467            | 0.040       | -1     | x1 - 2H, c1 - 2H, d1 - H2O,<br>w1 - H2O                                                                                                                                                                                                                                         | J3 |
| 361.026462         | 103.0 | C <sub>12</sub> H <sub>14</sub> O <sub>7</sub> N <sub>2</sub> PS                              | 361.026482            | 0.060       | -1     | w1 - NH3, d1 - NH3                                                                                                                                                                                                                                                              |    |
| 369.539723         | 146.9 | C <sub>24</sub> H <sub>31</sub> O <sub>14</sub> N <sub>5</sub> P <sub>2</sub> S <sub>2</sub>  | 369.539757            | 0.090       | -2     | d2                                                                                                                                                                                                                                                                              |    |
| 378.041314         | 42.8  | C <sub>36</sub> H <sub>43</sub> O <sub>18</sub> N <sub>13</sub> P <sub>3</sub> S <sub>3</sub> | 378.041349            | 0.090       | -3     | w3                                                                                                                                                                                                                                                                              |    |
| 378.053018         | 56.8  | C <sub>12</sub> H <sub>17</sub> O <sub>7</sub> N <sub>3</sub> PS                              | 378.053032            | 0.040       | -1     | d1, w1                                                                                                                                                                                                                                                                          |    |
| 386.032911         | 54.4  | C <sub>12</sub> H <sub>14</sub> N <sub>5</sub> O <sub>6</sub> PS                              | 386.032965            | 0.140       | -1     | b3(dA)w14,<br>z2(dG)d15,<br>y2(dG)c15,<br>x2(dG)b15,<br>w3b14 - 1H,<br>w2(dG)a15,<br>y3(dA)d14,<br>d3(dA)y14                                                                                                                                                                    | J5 |
| 386.032911         | 54.4  | C <sub>11</sub> H <sub>19</sub> NO <sub>8</sub> P <sub>3</sub>                                | 386.032901            | 0.030       | -1     |                                                                                                                                                                                                                                                                                 |    |
| 388.048703         | 15.6  | C <sub>12</sub> H <sub>15</sub> N <sub>5</sub> O <sub>6</sub> PS                              | 388.048615            | 0.230       | -1     |                                                                                                                                                                                                                                                                                 |    |
| 398.982222         | 48.1  | C <sub>10</sub> H <sub>13</sub> N <sub>2</sub> O <sub>9</sub> P <sub>2</sub> S                | 398.982249            | 0.070       | -1     |                                                                                                                                                                                                                                                                                 |    |
| 414.959383         | 192.4 | C <sub>10</sub> H <sub>14</sub> N <sub>2</sub> O <sub>8</sub> P <sub>2</sub> S <sub>2</sub>   | 414.959405            | 0.050       | -1     | c6(T)w11,<br>d4(T)x13,<br>d6(T)x11,<br>c4(T)w13,<br>w7(T)c10,<br>c5(T)w12,<br>d5(T)x12,                                                                                                                                                                                         | J6 |

|            |       |                                   |            |       |    |                                                                                                                                                                                                   |         |
|------------|-------|-----------------------------------|------------|-------|----|---------------------------------------------------------------------------------------------------------------------------------------------------------------------------------------------------|---------|
| 414.959383 | 192.4 | $C_{10}H_{13}N_2O_8P_2S_2$        | 414.959405 | 0.050 | -1 | w5(T)c12                                                                                                                                                                                          |         |
| 414.959455 | 79.7  | $C_{10}H_{14}N_2O_8P_2S_2$        | 414.959405 | -     | -1 | c6(T)w11,<br>d4(T)x13,<br>d6(T)x11,<br>c4(T)w13,<br>w7(T)c10,<br>c5(T)w12,<br>d5(T)x12,<br>w5(T)c12                                                                                               | J7      |
| 417.052741 | 47.6  | $C_{15}H_{18}N_2O_8PS$            | 417.052697 | 0.110 | -1 |                                                                                                                                                                                                   |         |
| 421.955313 | 9.9   | $C_{10}H_{11}N_5O_6P_2S_2$        | 421.955323 | 0.020 | -1 | d8(G)x9 - H2O,<br>x6(G)c11 - 1H,<br>c8(G)w9 - H2O,<br>w8(A)d9 - H2O,<br>c8(G)x9 - 2H,<br>d7(G)x10 -<br>H2O, w8c9 -<br>2H, w6(G)c11 -<br>H2O, x8(A)d9 -<br>1H, c7(G)x10 -<br>2H, c7(G)w10 -<br>H2O | J8      |
| 423.988698 | 29.9  | $C_9H_{18}NO_{10}P_4$             | 423.988667 | 0.070 | -1 |                                                                                                                                                                                                   |         |
| 431.693867 | 41.3  | $C_{41}H_{47}N_{12}O_{21}P_4S_4$  | 431.694284 | 0.970 | -3 | x4 - B(mC) -<br>NH2                                                                                                                                                                               |         |
| 432.028283 | 20.2  | $C_{79}H_{18}N_{11}O_7S_2$        | 432.028285 | 0.010 | -3 |                                                                                                                                                                                                   |         |
| 439.965857 | 72.8  | $C_{10}H_{13}N_5O_7P_2S_2$        | 439.965888 | 0.070 | -1 | d8(G)x9,<br>w6(G)c11,<br>c7(G)w10,<br>w8(A)d9,<br>d7(G)x10,<br>c8(G)w9                                                                                                                            | J9      |
| 439.965857 | 72.8  | $C_{13}H_{22}NP_8$                | 439.965869 | 0.030 | -1 |                                                                                                                                                                                                   |         |
| 442.059196 | 63.4  | $C_{14}H_{23}NO_9P_3$             | 442.059116 | 0.180 | -1 |                                                                                                                                                                                                   |         |
| 450.004372 | 11.1  | $C_{12}H_{14}N_5O_8P_2S$          | 450.004381 | 0.020 | -1 |                                                                                                                                                                                                   |         |
| 458.079170 | 15.2  | $C_{17}H_{21}O_8N_3PS$            | 458.079247 | 0.170 | -1 | z2 - B(dG) -<br>OC2H2, a2 -<br>B(dU) - OC2H2                                                                                                                                                      | J1<br>0 |
| 465.981472 | 26.4  | $C_{11}H_{20}NO_9P_4S$            | 465.981474 | 0.000 | -1 |                                                                                                                                                                                                   |         |
| 465.981472 | 26.4  | $C_{12}H_{15}N_5O_7P_2S_2$        | 465.981538 | 0.140 | -1 | d3(dA)x14,<br>w3c14,<br>c3(dA)w14                                                                                                                                                                 | J1<br>1 |
| 484.387795 | 18.7  | $C_{46}H_{57}N_{16}O_{23}P_4S_4$  | 484.387742 | -     | -3 | w4                                                                                                                                                                                                |         |
| 487.244768 | 11.1  | $C_{76}H_{93}N_{25}O_{40}P_7S_7$  | 487.244948 | 0.370 | -5 | w7                                                                                                                                                                                                |         |
| 494.985578 | 98.3  | $C_{12}H_{11}N_{12}OP_4S$         | 494.985546 | 0.060 | -1 |                                                                                                                                                                                                   |         |
| 504.014912 | 22.3  | $C_{17}H_{30}NS_8$                | 504.014943 | 0.060 | -1 |                                                                                                                                                                                                   |         |
| 507.090706 | 17.8  | $C_{36}H_{44}O_{17}N_{10}P_2S_2$  | 507.090677 | -     | -2 | b3                                                                                                                                                                                                |         |
| 512.996156 | 173.0 | $C_{16}H_{22}O_9P_5$              | 512.995741 | 0.810 | -1 |                                                                                                                                                                                                   |         |
| 519.593954 | 21.5  | $C_{36}H_{43}O_{16}N_{13}P_2S_2$  | 519.593918 | -     | -2 | y3                                                                                                                                                                                                |         |
| 519.992079 | 47.1  | $C_{18}H_{26}NOP_8$               | 519.992084 | 0.010 | -1 |                                                                                                                                                                                                   |         |
| 538.002646 | 166.9 | $C_{16}H_{21}N_3O_8P_5$           | 538.002223 | 0.790 | -1 |                                                                                                                                                                                                   |         |
| 540.549121 | 38.0  | $O_2P_3S_{13}$                    | 540.548589 | 0.990 | -2 |                                                                                                                                                                                                   |         |
| 553.052098 | 14.6  | $C_{86}H_{105}N_{30}O_{44}P_8S_8$ | 553.051900 | -     | -5 | w8                                                                                                                                                                                                |         |
| 558.560494 | 7.4   | $C_{36}H_{42}O_{17}N_{13}P_3S_3$  | 558.560380 | -     | -2 | x3 - 3H, w3 -<br>H2O                                                                                                                                                                              |         |
| 561.106223 | 15.4  | $C_{24}H_{30}N_4O_2P_5$           | 561.106235 | 0.020 | -1 |                                                                                                                                                                                                   |         |
| 567.565807 | 8.1   | $C_{36}H_{44}O_{18}N_{13}P_3S_3$  | 567.565662 | -     | -2 | w3                                                                                                                                                                                                |         |
| 570.056437 | 81.7  | $C_{28}H_4N_{13}O_3$              | 570.056555 | 0.210 | -2 |                                                                                                                                                                                                   |         |



|            |      |                                   |            |       |    |                            |
|------------|------|-----------------------------------|------------|-------|----|----------------------------|
| 718.079869 | 8.7  | $C_{46}H_{56}N_{16}O_{22}P_4S_4$  | 718.079969 | 0.140 | -2 | w4 - H2O, x4 - 3H          |
| 722.076223 | 11.3 | $C_{24}H_{30}O_{13}N_5P_2S_2$     | 722.076226 | 0.000 | -1 | d2 - H2O, c2 - 2H          |
| 726.001493 | 18.2 | $C_{41}H_{11}N_7P_3S$             | 726.001499 | 0.010 | -1 |                            |
| 732.071754 | 12.4 | $C_{24}H_{28}O_{12}N_7P_2S_2$     | 732.071809 | 0.080 | -1 | x2 - NH2                   |
| 737.075746 | 14.2 | $C_{21}H_{31}N_{10}O_8P_6$        | 737.075754 | 0.010 | -1 |                            |
| 740.086792 | 8.4  | $C_{24}H_{32}O_{14}N_5P_2S_2$     | 740.086791 | 0.000 | -1 | d2                         |
| 747.083103 | 40.1 | $C_{24}H_{29}O_{12}N_8P_2S_2$     | 747.082708 | -     | -1 | w2 - H2O, x2 - 2H          |
|            |      |                                   |            | 0.530 |    |                            |
| 753.587785 | 10.2 | $C_{96}H_{116}N_{35}O_{47}P_8S_8$ | 753.586285 | -     | -4 | y9 - 5H                    |
|            |      |                                   |            | 1.990 |    |                            |
| 780.765634 | 34.0 | $C_{76}H_{94}N_{25}O_{38}P_6S_6$  | 780.765268 | -     | -3 | y7                         |
|            |      |                                   |            | 0.470 |    |                            |
| 818.108671 | 21.5 | $C_{56}H_{68}N_{14}O_{28}P_4S_4$  | 818.108589 | -     | -2 | b5 - H2O, a5               |
|            |      |                                   |            | 0.100 |    |                            |
| 827.113486 | 5.7  | $C_{56}H_{70}N_{14}O_{29}P_4S_4$  | 827.113871 | 0.470 | -2 | b5                         |
| 831.414376 | 20.8 | $C_{81}H_{99}N_{21}O_{43}P_7S_7$  | 831.414346 | -     | -3 | a8 - B(G)                  |
|            |      |                                   |            | 0.040 |    |                            |
| 839.124994 | 32.6 | $C_{56}H_{70}N_{18}O_{27}P_4S_4$  | 839.125105 | 0.130 | -2 | y5                         |
| 840.015255 | 53.8 | $C_{27}H_{44}NO_7P_6S_5$          | 840.015254 | 0.000 | -1 |                            |
| 840.128425 | 17.9 | $C_{86}H_{199}N_3O_4P_{10}S$      | 840.128425 | 0.000 | -2 |                            |
| 887.097144 | 14.2 | $C_{56}H_{71}N_{18}O_{29}P_5S_5$  | 887.096848 | -     | -2 | w5                         |
|            |      |                                   |            | 0.330 |    |                            |
| 888.125468 | 6.5  | $C_{67}H_{14}N_5$                 | 888.125469 | 0.000 | -1 |                            |
| 906.135901 | 8.6  | $C_{15}H_{42}N_{17}O_{16}P_2S_4$  | 906.135901 | 0.000 | -1 |                            |
| 941.051857 | 18.8 | $C_{22}H_{51}N_2O_{18}P_{10}$     | 941.051856 | 0.000 | -1 |                            |
| 947.139794 | 28.3 | $C_{42}H_{27}N_8O_{19}$           | 947.139794 | 0.000 | -1 |                            |
| 947.139937 | 11.2 | $C_{15}H_{44}N_{22}O_{10}P_5S_7$  | 947.139885 | 0.050 | -1 |                            |
| 956.151449 | 28.0 | $C_{35}H_{60}NO_9P_2S_8$          | 956.151449 | 0.000 | -1 |                            |
| 956.151596 | 10.6 | $C_{18}H_{47}N_5O_{35}P_5S$       | 956.151540 | 0.060 | -1 |                            |
| 978.120379 | 14.2 | $C_{66}H_{81}N_{16}O_{34}P_5S_5$  | 978.120186 | -     | -2 | b6 - H2O, a6               |
|            |      |                                   |            | 0.200 |    |                            |
| 984.068731 | 32.2 | $C_{15}H_{45}N_{23}O_2P_{11}S_2$  | 984.068731 | 0.000 | -1 |                            |
| 984.068849 | 11.8 | $C_{12}H_{32}N_{19}O_{26}P_2S_2$  | 984.068802 | 0.050 | -1 |                            |
| 993.080976 | 7.5  | $C_{29}H_{33}N_{14}O_{16}S_5$     | 993.080800 | 0.180 | -1 |                            |
| 1015.18856 | 8.4  | $C_{36}H_{45}O_{17}N_{10}P_2S_2$  | 1015.18863 | 0.060 | -1 | b3                         |
| 1022.18341 | 13.6 | $C_{36}H_{42}O_{15}N_{13}P_2S_2$  | 1022.18454 | 1.110 | -1 | y3 - H2O, z3               |
| 1034.08454 | 12.9 | $C_{19}H_{44}N_{15}O_{19}P_8$     | 1034.08443 | 0.110 | -1 |                            |
| 1040.19545 | 106. | $C_{36}H_{44}O_{16}N_{13}P_2S_2$  | 1040.19511 | -     | -1 | y3                         |
| 1075.11090 | 20.1 | $C_{71}H_{88}N_{16}O_{38}P_6S_6$  | 1075.11032 | -     | -2 | b7 - B(G) - H2O, a7 - B(G) |
| 1091.11731 | 7.9  | $C_{35}H_{37}N_{24}OP_6S_3$       | 1091.11755 | 0.220 | -1 |                            |
| 1102.15001 | 5.8  | $C_{25}H_{64}N_5O_{24}P_4S_5$     | 1102.15007 | 0.060 | -1 |                            |
| 1107.11224 | 6.5  | $C_{26}H_{65}N_{14}O_2P_{10}S_6$  | 1107.11208 | 0.140 | -1 |                            |
| 1118.12864 | 9.6  | $C_{36}H_{43}O_{17}N_{13}P_3S_3$  | 1118.12803 | -     | -1 | w3 - H2O, x3 - 2H          |
| 1136.13758 | 31.2 | $C_{36}H_{45}O_{18}N_{13}P_3S_3$  | 1136.13860 | 0.900 | -1 | w3                         |
| 1141.12045 | 37.2 | $C_{79}H_{17}N_8O_2S$             | 1141.12006 | 0.340 | -1 |                            |
| 1201.15269 | 7.3  | $C_{87}H_{31}O_2P_2S$             | 1201.15254 | 0.120 | -1 |                            |
| 1317.20130 | 59.1 | $C_{46}H_{56}N_{12}O_{22}P_3S_3$  | 1317.20126 | -     | -1 | b4 - H2O, a4               |

2

|                  |       |
|------------------|-------|
| 1                | 0.030 |
| Abs mean error   | 0.407 |
| Abs mean std dev | 0.582 |

---



**Table S8 showing peak list, signal-to-noise ratio (S/N), elemental composition, and possible assignments with mass errors (ppm) of the [M-8H]<sup>8-</sup> danvatirsen by UVPD MS/MS, internal fragments marked by character (J), base losses are shown inside the parenthesis.**

| Measured <i>mz</i> | S/N   | Elemental Composition                                            | Theoretical <i>mz</i> | Error (ppm) | Charge | Assignment                                                                                                                                                                                                                                      |
|--------------------|-------|------------------------------------------------------------------|-----------------------|-------------|--------|-------------------------------------------------------------------------------------------------------------------------------------------------------------------------------------------------------------------------------------------------|
| 165.949534         | 243.1 | CH <sub>3</sub> N <sub>3</sub> OP <sub>3</sub>                   | 165.949446            | 0.530       | -1     |                                                                                                                                                                                                                                                 |
| 317.024069         | 45.9  | C <sub>10</sub> H <sub>13</sub> N <sub>3</sub> O <sub>5</sub> PS | 317.024077            | 0.020       | -1     | w4(mC)a13 - 1H, w4b13 - H <sub>2</sub> O, z4(mC)d13 - 1H, x4(mC)b13 - 1H, y4(mC)c13 - 1H                                                                                                                                                        |
| 319.015954         | 290.6 | C <sub>10</sub> H <sub>13</sub> N <sub>2</sub> O <sub>6</sub> PS | 319.015918            | -0.110      | -1     | a5(T)w12, a4(T)w13, b4(T)x13, c4(T)y13, d4(T)z13, w4b13 - NH <sub>2</sub> , z5(T)d12, b5(T)x12, x5(T)b12, y5(T)c12, d6(T)z11, c5(T)y12, w7(T)a10, d5(T)z12, a6(T)w11, c6(T)y11, b6(T)x11, y7(T)c10, z7(T)d10, w5(T)a12, x7(T)b10                |
| 328.027552         | 46.2  | C <sub>10</sub> H <sub>12</sub> N <sub>5</sub> O <sub>4</sub> PS | 328.027486            | -0.200      | -1     | z6(G)c11, y8(A)c9, c8(G)z9, a8(G)x9, c7(G)z10, a7(G)x10, a9(A)w8, x8(A)b9, w8(A)a9, b9(A)x8, z8(A)d9                                                                                                                                            |
| 343.014588         | 303.8 | C <sub>10</sub> H <sub>11</sub> N <sub>5</sub> O <sub>5</sub> PS | 343.014575            | -0.040      | -1     | w6b11 - H <sub>2</sub> O, d7(G)z10 - 1H, c7(G)y10 - 1H, z6(G)d11 - 1H, b7(G)x10 - 1H, a7(G)w10 - 1H, d8(G)z9 - 1H, x6(G)b11 - 1H, y6(G)c11 - 1H, w8b9 - 2H, y8(A)d9 - 1H, w6(G)a11 - 1H, a8(G)w9 - 1H, b9(A)w8 - 1H, b8(G)x9 - 1H, c8(G)y9 - 1H |
| 360.042496         | 44.3  | C <sub>12</sub> H <sub>15</sub> O <sub>6</sub> N <sub>3</sub> PS | 360.042467            | -0.080      | -1     | x1 - 2H, c1 - 2H, d1 - H <sub>2</sub> O, w1 - H <sub>2</sub> O                                                                                                                                                                                  |
| 361.026562         | 68.3  | C <sub>12</sub> H <sub>14</sub> O <sub>7</sub> N <sub>2</sub> PS | 361.026482            | -0.220      | -1     | w1 - NH <sub>3</sub> , d1 - NH <sub>3</sub>                                                                                                                                                                                                     |
| 370.038128         | 95.1  | C <sub>12</sub> H <sub>14</sub> N <sub>5</sub> O <sub>5</sub> PS | 370.038050            | -0.210      | -1     | c3(dA)y14, a3(dA)w14,                                                                                                                                                                                                                           |

|            |       |                                       |            |       |    |                                                                                                              |         |
|------------|-------|---------------------------------------|------------|-------|----|--------------------------------------------------------------------------------------------------------------|---------|
| 378.053085 | 105.8 | $C_{12}H_{17}O_7N_3PS$                | 378.053032 | -     | -1 | w3(dA)a14,<br>y3(dA)c14,<br>z2(dG)c15,<br>b3(dA)x14,<br>z3(dA)d14,<br>x3(dA)b14,<br>d3(dA)z14<br>d1, w1      |         |
| 386.032973 | 114.9 | $C_{12}H_{14}N_5O_6PS$                | 386.032965 | -     | -1 | b3(dA)w14,<br>z2(dG)d15,<br>y2(dG)c15,<br>x2(dG)b15,<br>w3b14 - 1H,<br>w2(dG)a15,<br>y3(dA)d14,<br>d3(dA)y14 | J7      |
| 398.982326 | 98.2  | $C_8H_{16}O_{12}PS_2$                 | 398.982629 | 0.760 | -1 |                                                                                                              |         |
| 414.959499 | 83.3  | $C_{10}H_{14}N_2O_8P_2S_2$            | 414.959405 | -     | -1 | c6(T)w11,<br>d4(T)x13,<br>d6(T)x11,<br>c4(T)w13,<br>w7(T)c10,<br>c5(T)w12,<br>d5(T)x12,<br>w5(T)c12          | J8      |
| 423.988720 | 160.6 | $C_9H_{18}NO_{10}P_4$                 | 423.988667 | 0.130 | -1 |                                                                                                              |         |
| 439.965913 | 118.1 | $C_{10}H_{13}N_5O_7P_2S_2$            | 439.965888 | -     | -1 | d8(G)x9,<br>w6(G)c11,<br>c7(G)w10,<br>w8(A)d9,<br>d7(G)x10,<br>c8(G)w9                                       | J9      |
| 450.004400 | 171.2 | $C_{11}H_{20}NO_{10}P_4$              | 450.004317 | 0.190 | -1 |                                                                                                              |         |
| 450.004488 | 70.5  | $C_{11}H_{20}NO_{10}P_4$              | 450.004317 | 0.380 | -1 |                                                                                                              |         |
| 465.981595 | 107.3 | $C_{12}H_{15}N_5O_7P_2S_2$            | 465.981538 | -     | -1 | d3(dA)x14,<br>w3c14,<br>c3(dA)w14<br>d3w14,<br>w2(dG)c15,<br>w3(dA)d14<br>w4                                 | J1<br>0 |
| 481.976495 | 78.0  | $C_{12}H_{15}N_5O_8P_2S_2$            | 481.976452 | -     | -1 |                                                                                                              | J1<br>1 |
| 484.387651 | 47.9  | $C_{46}H_{57}N_{16}O_{23}P_4S_4$      | 484.387742 | 0.190 | -3 |                                                                                                              |         |
| 512.996331 | 115.6 | $C_{17}H_{26}O_4P_5S_2$               | 512.996610 | 0.540 | -1 |                                                                                                              |         |
| 554.558523 | 156.9 | $C_{36}H_{44}O_{19}N_{10}P_3S_3$      | 554.558508 | -     | -2 | d3 - 3H                                                                                                      |         |
| 566.557816 | 60.3  | $C_{36}H_{42}O_{18}N_{13}P_3S_3$      | 566.557837 | 0.040 | -2 | w3 - 4H                                                                                                      |         |
| 567.565906 | 42.0  | $C_{36}H_{44}O_{18}N_{13}P_3S_3$      | 567.565662 | -     | -2 | w3                                                                                                           |         |
| 591.062499 | 33.8  | $C_{56}H_{70}N_{18}O_{29}P_5S_5$      | 591.062140 | -     | -3 | w5                                                                                                           |         |
| 595.075718 | 53.1  | $C_{41}H_{49}N_{10}O_{20}P_3S_3$      | 595.075528 | -     | -2 | y4 - B(dG) -<br>NH3, b4 - B(T)<br>- H2O, a4 -<br>B(T)<br>d7                                                  |         |
| 603.302333 | 5.4   | $C_{76}H_{94}N_{21}O_{42}P_7S_7$      | 603.302387 | 0.090 | -4 | w7                                                                                                           |         |
| 609.308403 | 104.9 | $C_{76}H_{94}N_{25}O_{40}P_7S_7$      | 609.308004 | -     | -4 |                                                                                                              |         |
| 639.039335 | 59.3  | $C_{25}H_{20}O_{18}P$                 | 639.039274 | 0.100 | -1 |                                                                                                              |         |
| 644.143460 | 66.5  | $C_{24}H_{31}O_{12}N_5PS$             | 644.143303 | -     | -1 | b2                                                                                                           |         |
| 651.744552 | 8.1   | $C_9H_{15}NO_7P_{13}$                 | 651.744306 | 0.380 | -1 |                                                                                                              |         |
| 651.744755 | 48.8  | $C_{66}H_{80}N_{16}O_{34}P_5S_5$      | 651.744365 | -     | -3 | b6 - H2O, a6                                                                                                 |         |
| 657.593238 | 234.3 | $C_{46}H_{54}N_{12}O_{22}P_3S_3$      | 657.593080 | -     | -2 | a4 - 3H                                                                                                      |         |
| 658.097591 | 90.1  | $C_{46}H_{55}N_{12}O_{22}P_3S_3$      | 658.096992 | -     | -2 | b4 - H2O, a4                                                                                                 |         |
| 659.311877 | 43.4  | $C_{167}H_{203}N_{51}O_{88}P_{15}S_1$ | 659.311204 | -     | -8 | M - 9H - A, M -                                                                                              |         |



|            |        |                                       |            |       |    |                                                                                   |
|------------|--------|---------------------------------------|------------|-------|----|-----------------------------------------------------------------------------------|
| 796.282183 | 8.8    | $C_{126}H_{152}N_{44}O_{63}P_{11}S_1$ | 796.282238 | 0.070 | -5 | y12 - H2O, z12                                                                    |
| 804.739567 | 15.7   | $C_{76}H_{95}N_{21}O_{42}P_7S_7$      | 804.738941 | -     | -3 | d7                                                                                |
|            |        |                                       |            | 0.780 |    |                                                                                   |
| 812.747049 | 67.8   | $C_{76}H_{95}N_{25}O_{40}P_7S_7$      | 812.746430 | -     | -3 | w7                                                                                |
|            |        |                                       |            | 0.760 |    |                                                                                   |
| 818.108812 | 85.4   | $C_{56}H_{68}N_{14}O_{28}P_4S_4$      | 818.108589 | -     | -2 | b5 - H2O, a5                                                                      |
|            |        |                                       |            | 0.270 |    |                                                                                   |
| 819.072842 | 210.4  | $C_{126}H_{155}N_{44}O_{66}P_{12}S_1$ | 819.073048 | 0.250 | -5 | w12                                                                               |
| 823.085229 | 40.3   | $C_{106}H_{127}N_{33}O_{54}P_9S_9$    | 823.083826 | -     | -4 | a10 - 5H                                                                          |
|            |        |                                       |            | 1.700 |    |                                                                                   |
| 830.120351 | 70.1   | $C_{56}H_{68}N_{18}O_{26}P_4S_4$      | 830.119822 | -     | -2 | y5 - H2O, z5                                                                      |
|            |        |                                       |            | 0.640 |    |                                                                                   |
| 831.414997 | 15.4   | $C_{81}H_{99}N_{21}O_{43}P_7S_7$      | 831.414346 | -     | -3 | a8 - B(G)                                                                         |
|            |        |                                       |            | 0.780 |    |                                                                                   |
| 833.276084 | 7.7    | $C_{131}H_{160}N_{41}O_{69}P_{12}S_1$ | 833.275978 | -     | -5 | y13 - B(A) -<br>H2O, z13 -<br>B(A), b13 - 7H<br>z10, y10 - H2O                    |
|            |        |                                       |            | 0.130 |    |                                                                                   |
| 835.593335 | 9.9    | $C_{106}H_{127}N_{40}O_{51}P_9S_9$    | 835.593020 | -     | -4 |                                                                                   |
|            |        |                                       |            | 0.380 |    |                                                                                   |
| 839.125443 | 12.8   | $C_{56}H_{70}N_{18}O_{27}P_4S_4$      | 839.125105 | -     | -2 | y5                                                                                |
|            |        |                                       |            | 0.400 |    |                                                                                   |
| 840.095798 | 42.7   | $C_{106}H_{129}N_{40}O_{52}P_9S_9$    | 840.095661 | -     | -4 | y10                                                                               |
|            |        |                                       |            | 0.160 |    |                                                                                   |
| 851.824789 | 24.3   | $C_{106}H_{131}N_{33}O_{57}P_{10}S_1$ | 851.824295 | -     | -4 | d10                                                                               |
|            |        |                                       |            | 0.580 |    |                                                                                   |
| 855.084729 | 13.2   | $C_{136}H_{165}N_{43}O_{70}P_{12}S_1$ | 855.084015 | -     | -5 | a13 - 6H                                                                          |
|            |        |                                       |            | 0.830 |    |                                                                                   |
| 860.286768 | 230.1  | $C_{136}H_{165}N_{46}O_{69}P_{12}S_1$ | 860.286877 | 0.130 | -5 | z13, y13 - H2O                                                                    |
|            |        |                                       |            | 0.130 |    |                                                                                   |
| 863.578875 | 16.5   | $C_{106}H_{128}N_{40}O_{54}P_{10}S_1$ | 863.577620 | -     | -4 | w10 - 6H                                                                          |
|            |        |                                       |            | 1.450 |    |                                                                                   |
| 866.080330 | 5.2    | $C_{56}H_{69}N_{14}O_{30}P_5S_5$      | 866.080333 | 0.000 | -2 | c5 - 3H, d5 -<br>H2O                                                              |
| 870.103012 | 11.9   | $C_{31}H_{34}O_{15}N_7P_2S_2$         | 870.103503 | 0.560 | -1 | z3 - B(dA) -<br>NH3, a3 - 3H                                                      |
| 871.328786 | 6.4    | $C_{111}H_{133}N_{33}O_{58}P_{10}S_1$ | 871.326936 | -     | -4 | a11 - 6H, a11 -<br>B(A) - H2O                                                     |
|            |        |                                       |            | 2.120 |    |                                                                                   |
| 875.086573 | 12.6   | $C_{56}H_{71}N_{14}O_{31}P_5S_5$      | 875.085615 | -     | -2 | d5                                                                                |
|            |        |                                       |            | 1.090 |    |                                                                                   |
| 876.582999 | 32.2   | $C_{167}H_{204}N_{51}O_{87}P_{15}S_1$ | 876.583574 | 0.660 | -6 | M - 8H - dG, M<br>- 6H - H2O - A,<br>M - 8H - G, M -<br>6H - H2O - dA<br>d13 - 7H |
|            |        |                                       |            | 0.660 |    |                                                                                   |
| 877.672545 | 10.2   | $C_{136}H_{167}N_{43}O_{73}P_{13}S_1$ | 877.673261 | 0.820 | -5 |                                                                                   |
| 879.249058 | 18.7   | $C_{167}H_{204}N_{51}O_{88}P_{15}S_1$ | 879.249393 | 0.380 | -6 | M - 8H - dA, M<br>- 8H - A                                                        |
| 881.429630 | 106.8  | $C_{86}H_{103}N_{26}O_{44}P_7S_7$     | 881.428208 | -     | -3 | a8 - 4H                                                                           |
|            |        |                                       |            | 1.610 |    |                                                                                   |
| 882.093894 | 29.4   | $C_{86}H_{103}N_{25}O_{45}P_7S_7$     | 882.092155 | -     | -3 | b8 - NH3                                                                          |
|            |        |                                       |            | 1.970 |    |                                                                                   |
| 884.440406 | 75.2   | $C_{86}H_{104}N_{30}O_{41}P_7S_7$     | 884.440000 | -     | -3 | y8 - H2O, z8                                                                      |
|            |        |                                       |            | 0.460 |    |                                                                                   |
| 887.097547 | 156.8  | $C_{56}H_{71}N_{18}O_{29}P_5S_5$      | 887.096848 | -     | -2 | w5                                                                                |
|            |        |                                       |            | 0.790 |    |                                                                                   |
| 901.758316 | 1240.9 | $C_{172}H_{209}N_{56}O_{88}P_{15}S_1$ | 901.758475 | 0.180 | -6 | M - 8H                                                                            |
|            |        |                                       |            | 0.180 |    |                                                                                   |
| 908.420078 | 11.7   | $C_{84}H_{105}N_{30}O_{43}P_8S_8$     | 908.421163 | 1.190 | -3 | w8 - OC2H2                                                                        |
| 909.341915 | 32.6   | $C_{116}H_{139}N_{38}O_{59}P_{10}S_1$ | 909.341245 | -     | -4 | a11 - 5H                                                                          |
|            |        |                                       |            | 0.740 |    |                                                                                   |

|            |      |                                                                                                  |            |       |    |                            |
|------------|------|--------------------------------------------------------------------------------------------------|------------|-------|----|----------------------------|
| 915.347980 | 17.5 | C <sub>116</sub> H <sub>139</sub> N <sub>42</sub> O <sub>57</sub> P <sub>10</sub> S <sub>1</sub> | 915.346862 | -     | -4 | z11 - 5H                   |
| 919.078457 | 12.1 | C <sub>86</sub> H <sub>105</sub> N <sub>26</sub> O <sub>47</sub> P <sub>8</sub> S <sub>8</sub>   | 919.076950 | -     | -3 | d8 - 5H                    |
| 922.425236 | 56.4 | C <sub>86</sub> H <sub>107</sub> N <sub>30</sub> O <sub>44</sub> P <sub>8</sub> S <sub>8</sub>   | 922.424684 | -     | -3 | w8                         |
| 943.836443 | 17.2 | C <sub>116</sub> H <sub>142</sub> N <sub>42</sub> O <sub>60</sub> P <sub>11</sub> S <sub>1</sub> | 943.835375 | -     | -4 | w11 - 5H                   |
| 946.090206 | 10.9 | C <sub>91</sub> H <sub>110</sub> N <sub>26</sub> O <sub>48</sub> P <sub>8</sub> S <sub>8</sub>   | 946.088297 | -     | -3 | a9 - 4H                    |
| 978.120869 | 11.3 | C <sub>23</sub> H <sub>62</sub> N <sub>9</sub> O <sub>5</sub> P <sub>14</sub>                    | 978.120608 | 0.270 | -1 |                            |
| 978.121170 | 76.1 | C <sub>66</sub> H <sub>81</sub> N <sub>16</sub> O <sub>34</sub> P <sub>5</sub> S <sub>5</sub>    | 978.120186 | -     | -2 | b6 - H2O, a6               |
| 979.118137 | 14.7 | C <sub>66</sub> H <sub>81</sub> N <sub>15</sub> O <sub>35</sub> P <sub>5</sub> S <sub>5</sub>    | 979.116107 | -     | -2 | b6 - NH2                   |
| 984.069143 | 84.8 | C <sub>60</sub> H <sub>74</sub> N <sub>18</sub> O <sub>34</sub> P <sub>6</sub> S <sub>6</sub>    | 984.068789 | -     | -2 | w6 - B(dA) - CH4           |
| 987.125573 | 6.9  | C <sub>66</sub> H <sub>83</sub> N <sub>16</sub> O <sub>35</sub> P <sub>5</sub> S <sub>5</sub>    | 987.125469 | -     | -2 | b6                         |
| 989.096010 | 18.6 | C <sub>126</sub> H <sub>151</sub> N <sub>40</sub> O <sub>65</sub> P <sub>11</sub> S <sub>1</sub> | 989.095087 | -     | -4 | a12 - 6H                   |
| 991.107283 | 28.7 | C <sub>96</sub> H <sub>115</sub> N <sub>31</sub> O <sub>48</sub> P <sub>8</sub> S <sub>8</sub>   | 991.106462 | -     | -3 | a9 - 4H                    |
| 992.107347 | 11.5 | C <sub>96</sub> H <sub>116</sub> N <sub>30</sub> O <sub>49</sub> P <sub>8</sub> S <sub>8</sub>   | 992.106350 | -     | -3 | b9 - NH2                   |
| 1005.45342 | 6.9  | C <sub>96</sub> H <sub>118</sub> N <sub>35</sub> O <sub>47</sub> P <sub>8</sub> S <sub>8</sub>   | 1005.45341 | -     | -3 | y9                         |
| 1011.64001 | 9.6  | C <sub>66</sub> H <sub>82</sub> N <sub>23</sub> O <sub>32</sub> P <sub>5</sub> S <sub>5</sub>    | 1011.63994 | -     | -2 | y6                         |
| 1015.18887 | 38.5 | C <sub>36</sub> H <sub>45</sub> O <sub>17</sub> N <sub>10</sub> P <sub>2</sub> S <sub>2</sub>    | 1015.18863 | -     | -1 | b3                         |
| 1017.58433 | 5.3  | C <sub>126</sub> H <sub>154</sub> N <sub>40</sub> O <sub>68</sub> P <sub>12</sub> S <sub>1</sub> | 1017.58360 | -     | -4 | d12 - 6H                   |
| 1022.18462 | 15.6 | C <sub>36</sub> H <sub>42</sub> O <sub>15</sub> N <sub>13</sub> P <sub>2</sub> S <sub>2</sub>    | 1022.18454 | -     | -1 | y3 - H2O, z3               |
| 1023.58912 | 20.7 | C <sub>126</sub> H <sub>154</sub> N <sub>44</sub> O <sub>66</sub> P <sub>12</sub> S <sub>1</sub> | 1023.58921 | 0.090 | -4 | w12 - 6H                   |
| 1026.09280 | 6.2  | C <sub>66</sub> H <sub>82</sub> N <sub>16</sub> O <sub>36</sub> P <sub>6</sub> S <sub>6</sub>    | 1026.09193 | -     | -2 | c6 - 3H, d6 - H2O          |
| 1029.29024 | 12.5 | C <sub>160</sub> H <sub>195</sub> O <sub>84</sub> N <sub>53</sub> P <sub>15</sub> S <sub>1</sub> | 1029.29037 | 0.130 | -5 | w15 - 7H, d15 - 7H         |
| 1035.09807 | 13.7 | C <sub>66</sub> H <sub>84</sub> N <sub>16</sub> O <sub>37</sub> P <sub>6</sub> S <sub>6</sub>    | 1035.09721 | -     | -2 | d6                         |
| 1037.10047 | 27.5 | C <sub>96</sub> H <sub>118</sub> N <sub>35</sub> O <sub>49</sub> P <sub>9</sub> S <sub>9</sub>   | 1037.09863 | -     | -3 | w9 - 4H                    |
| 1040.19533 | 54.0 | C <sub>36</sub> H <sub>44</sub> O <sub>16</sub> N <sub>13</sub> P <sub>2</sub> S <sub>2</sub>    | 1040.19511 | -     | -1 | y3                         |
| 1059.61149 | 31.9 | C <sub>66</sub> H <sub>83</sub> N <sub>23</sub> O <sub>34</sub> P <sub>6</sub> S <sub>6</sub>    | 1059.61168 | 0.180 | -2 | w6                         |
| 1068.85458 | 9.1  | C <sub>136</sub> H <sub>165</sub> N <sub>43</sub> O <sub>70</sub> P <sub>12</sub> S <sub>1</sub> | 1068.85488 | 0.280 | -4 | a13 - 6H                   |
| 1075.11121 | 72.7 | C <sub>71</sub> H <sub>88</sub> N <sub>16</sub> O <sub>38</sub> P <sub>6</sub> S <sub>6</sub>    | 1075.11032 | -     | -2 | b7 - B(G) - H2O, a7 - B(G) |
| 1075.60799 | 20.2 | C <sub>136</sub> H <sub>166</sub> N <sub>46</sub> O <sub>69</sub> P <sub>12</sub> S <sub>1</sub> | 1075.61041 | 2.250 | -4 | y13 - H2O, z13             |
| 1082.31048 | 7.0  | C <sub>172</sub> H <sub>210</sub> N <sub>56</sub> O <sub>88</sub> P <sub>15</sub> S <sub>1</sub> | 1082.31162 | 1.050 | -5 | M - 7H                     |
| 1082.51137 | 11.5 | C <sub>172</sub> H <sub>211</sub> N <sub>56</sub> O <sub>88</sub> P <sub>15</sub> S <sub>1</sub> | 1082.51319 | 1.680 | -5 | M - 6H                     |
| 1093.12265 | 6.5  | C <sub>36</sub> H <sub>44</sub> O <sub>18</sub> N <sub>10</sub> P <sub>3</sub> S <sub>3</sub>    | 1093.12155 | -     | -1 | c3 - 2H, d3 - H2O          |

|            |       |                                       |  |            |       |    |                                              |
|------------|-------|---------------------------------------|--|------------|-------|----|----------------------------------------------|
| 2          |       |                                       |  | 3          | 1.010 |    |                                              |
| 1097.44700 | 17.6  | $C_{106}H_{127}N_{33}O_{54}P_9S_9$    |  | 1097.44491 | -     | -3 | a10 - 5H                                     |
| 4          |       |                                       |  | 8          | 1.900 |    |                                              |
| 1111.13198 | 60.8  | $C_{36}H_{46}O_{19}N_{10}P_3S_3$      |  | 1111.13211 | 0.120 | -1 | d3                                           |
| 4          |       |                                       |  | 9          |       |    |                                              |
| 1114.12414 | 5.7   | $C_{106}H_{127}N_{40}O_{51}P_9S_9$    |  | 1114.12384 | -     | -3 | z10 - 4H                                     |
| 4          |       |                                       |  | 3          | 0.270 |    |                                              |
| 1118.12819 | 36.1  | $C_{36}H_{43}O_{17}N_{13}P_3S_3$      |  | 1118.12803 | -     | -1 | w3 - H2O, x3 - 2H                            |
| 8          |       |                                       |  | 6          | 0.140 |    |                                              |
| 1118.12844 | 13.1  | $C_{36}H_{43}O_{17}N_{13}P_3S_3$      |  | 1118.12803 | -     | -1 | w3 - H2O, x3 - 2H                            |
| 0          |       |                                       |  | 6          | 0.360 |    |                                              |
| 1136.13888 | 204.5 | $C_{36}H_{45}O_{18}N_{13}P_3S_3$      |  | 1136.13860 | -     | -1 | w3                                           |
| 1          |       |                                       |  | 0          | 0.250 |    |                                              |
| 1149.62985 | 14.1  | $C_{76}H_{91}N_{21}O_{39}P_6S_6$      |  | 1149.62719 | -     | -2 | a7 - 4H                                      |
| 2          |       |                                       |  | 9          | 2.310 |    |                                              |
| 1150.63526 | 46.9  | $C_{76}H_{93}N_{21}O_{39}P_6S_6$      |  | 1150.63502 | -     | -2 | b7 - H2O, a7                                 |
| 0          |       |                                       |  | 4          | 0.210 |    |                                              |
| 1151.77413 | 7.5   | $C_{106}H_{129}N_{40}O_{54}P_{10}S_1$ |  | 1151.77258 | -     | -3 | w10 - 5H                                     |
| 2          |       |                                       |  | 5          | 1.340 |    |                                              |
| 1162.64610 | 9.2   | $C_{76}H_{93}N_{25}O_{37}P_6S_6$      |  | 1162.64625 | 0.130 | -2 | z7, y7 - H2O                                 |
| 6          |       |                                       |  | 8          |       |    |                                              |
| 1171.65079 | 10.8  | $C_{76}H_{95}N_{25}O_{38}P_6S_6$      |  | 1171.65154 | 0.630 | -2 | y7                                           |
| 7          |       |                                       |  | 0          |       |    |                                              |
| 1191.15830 | 46.8  | $C_{41}H_{50}N_{10}O_{20}P_3S_3$      |  | 1191.15833 | 0.020 | -1 | b4 - B(T) - H2O, a4 - B(T), y4 - B(dG) - NH3 |
| 7          |       |                                       |  | 3          |       |    | a11 - 5H                                     |
| 1212.45649 | 7.0   | $C_{116}H_{139}N_{38}O_{59}P_{10}S_1$ |  | 1212.45481 | -     | -3 |                                              |
| 9          |       |                                       |  | 1          | 1.390 |    |                                              |
| 1216.16485 | 13.1  | $C_{41}H_{49}N_{13}O_{19}P_3S_3$      |  | 1216.16481 | -     | -1 | y4 - B(mC) - H2O, z4 - B(mC)                 |
| 4          |       |                                       |  | 6          | 0.030 |    | w7 - 4H                                      |
| 1218.61785 | 8.1   | $C_{76}H_{94}N_{25}O_{40}P_7S_7$      |  | 1218.61545 | -     | -2 |                                              |
| 2          |       |                                       |  | 9          | 1.960 |    |                                              |
| 1219.62374 | 26.4  | $C_{76}H_{96}N_{25}O_{40}P_7S_7$      |  | 1219.62328 | -     | -2 | w7                                           |
| 1          |       |                                       |  | 4          | 0.370 |    |                                              |
| 1247.62377 | 12.8  | $C_{81}H_{100}N_{21}O_{43}P_7S_7$     |  | 1247.62515 | 1.110 | -2 | a8 - B(G), b8 - B(G) - H2O                   |
| 1          |       |                                       |  | 8          |       |    |                                              |
| 1258.78289 | 6.6   | $C_{116}H_{143}N_{42}O_{60}P_{11}S_1$ |  | 1258.78292 | 0.020 | -3 | w11 - 4H                                     |
| 7          |       |                                       |  | 5          |       |    |                                              |
| 1317.20247 | 71.2  | $C_{46}H_{56}N_{12}O_{22}P_3S_3$      |  | 1317.20126 | -     | -1 | b4 - H2O, a4                                 |
| 2          |       |                                       |  | 1          | 0.920 |    |                                              |
| 1319.19583 | 8.8   | $C_{46}H_{56}N_{11}O_{23}P_3S_3$      |  | 1319.19310 | -     | -1 | b4 - NH2                                     |
| 5          |       |                                       |  | 1          | 2.070 |    |                                              |
| 1322.64728 | 11.4  | $C_{86}H_{104}N_{26}O_{44}P_7S_7$     |  | 1322.64595 | -     | -2 | a8 - 3H                                      |
| 9          |       |                                       |  | 0          | 1.010 |    |                                              |
| 1335.21256 | 8.6   | $C_{46}H_{58}N_{12}O_{23}P_3S_3$      |  | 1335.21182 | -     | -1 | b4                                           |
| 8          |       |                                       |  | 5          | 0.560 |    |                                              |
| 1341.22592 | 9.6   | $C_{46}H_{56}N_{16}O_{20}P_3S_3$      |  | 1341.22372 | -     | -1 | y4 - H2O, z4                                 |
| 1          |       |                                       |  | 7          | 1.640 |    |                                              |
| 1359.23430 | 10.2  | $C_{46}H_{58}N_{16}O_{21}P_3S_3$      |  | 1359.23429 | -     | -1 | y4                                           |
| 0          |       |                                       |  | 2          | 0.010 |    |                                              |
| 1384.13905 | 9.8   | $C_{86}H_{108}N_{30}O_{44}P_8S_8$     |  | 1384.14066 | 1.160 | -2 | w8                                           |
| 6          |       |                                       |  | 5          |       |    |                                              |
| 1413.14527 | 13.1  | $C_{46}H_{57}N_{12}O_{24}P_4S_4$      |  | 1413.14474 | -     | -1 | d4 - H2O, c4 - 2H                            |
| 5          |       |                                       |  | 8          | 0.370 |    |                                              |
| 1431.15502 | 6.7   | $C_{46}H_{59}N_{12}O_{25}P_4S_4$      |  | 1431.15531 | 0.200 | -1 | d4                                           |
| 8          |       |                                       |  | 2          |       |    |                                              |
| 1455.17738 | 27.3  | $C_{46}H_{59}N_{16}O_{23}P_4S_4$      |  | 1455.17777 | 0.270 | -1 | w4                                           |
| 9          |       |                                       |  | 9          |       |    |                                              |
| 1637.22440 | 14.4  | $C_{56}H_{69}N_{14}O_{28}P_4S_4$      |  | 1637.22445 | 0.030 | -1 | b5 - H2O, a5                                 |
| 1          |       |                                       |  | 4          |       |    |                                              |

|            |      |                                  |            |       |    |            |
|------------|------|----------------------------------|------------|-------|----|------------|
| 1650.14345 | 9.0  | $C_{51}H_{65}N_{15}O_{28}P_5S_5$ | 1650.14206 | -     | -1 | w5 - B(mC) |
| 3          |      |                                  | 1          | 0.840 |    |            |
| 1775.20049 | 11.7 | $C_{56}H_{72}N_{18}O_{29}P_5S_5$ | 1775.20097 | 0.270 | -1 | w5         |
| 6          |      |                                  | 3          |       |    |            |
|            |      |                                  | Abs mean   | 0.703 |    |            |
|            |      |                                  | error      |       |    |            |
|            |      |                                  | Abs mean   | 0.616 |    |            |
|            |      |                                  | std dev    |       |    |            |

---













|             |       |                                                                                                   |              |        |    |                               |
|-------------|-------|---------------------------------------------------------------------------------------------------|--------------|--------|----|-------------------------------|
| 1259.118979 | 31.6  | C <sub>116</sub> H <sub>144</sub> N <sub>42</sub> O <sub>60</sub> P <sub>11</sub> S <sub>11</sub> | 1259.119050  | 0.060  | -3 | w11                           |
| 1266.781359 | 13.4  | C <sub>119</sub> H <sub>149</sub> N <sub>35</sub> O <sub>65</sub> P <sub>11</sub> S <sub>11</sub> | 1266.782927  | 1.240  | -3 | b12 - B(A) -<br>OC2H2         |
| 1272.102168 | 11.6  | C <sub>40</sub> H <sub>50</sub> N <sub>11</sub> O <sub>21</sub> P <sub>4</sub> S <sub>4</sub>     | 1272.102155  | -0.010 | -1 | x4 - B(dG) -<br>CH3           |
| 1272.770892 | 10.5  | C <sub>120</sub> H <sub>143</sub> N <sub>37</sub> O <sub>64</sub> P <sub>11</sub> S <sub>11</sub> | 1272.771022  | 0.100  | -3 | a12 - B(dC) -<br>CH4          |
| 1316.194430 | 87.0  | C <sub>46</sub> H <sub>55</sub> N <sub>12</sub> O <sub>22</sub> P <sub>3</sub> S <sub>3</sub>     | 1316.193985  | -0.340 | -1 | a4 - 2H                       |
| 1317.200900 | 151.6 | C <sub>46</sub> H <sub>56</sub> N <sub>12</sub> O <sub>22</sub> P <sub>3</sub> S <sub>3</sub>     | 1317.201261  | 0.270  | -1 | b4 - H2O, a4                  |
| 1318.204373 | 55.0  |                                                                                                   |              |        |    |                               |
| 1322.646805 | 17.8  | C <sub>86</sub> H <sub>104</sub> N <sub>26</sub> O <sub>44</sub> P <sub>7</sub> S <sub>7</sub>    | 1322.646224  | -0.440 | -2 | a8 - 3H                       |
| 1323.149057 | 36.9  | C <sub>86</sub> H <sub>105</sub> N <sub>26</sub> O <sub>44</sub> P <sub>7</sub> S <sub>7</sub>    | 1323.149862  | 0.610  | -2 | b8 - H2O, a8                  |
| 1335.212899 | 21.4  | C <sub>46</sub> H <sub>58</sub> N <sub>12</sub> O <sub>23</sub> P <sub>3</sub> S <sub>3</sub>     | 1335.212374  | -0.390 | -1 | b4                            |
| 1341.223974 | 31.9  | C <sub>46</sub> H <sub>56</sub> N <sub>16</sub> O <sub>20</sub> P <sub>3</sub> S <sub>3</sub>     | 1341.223727  | -0.180 | -1 | y4 - H2O, z4                  |
| 1353.393705 | 68.1  | C <sub>172</sub> H <sub>212</sub> N <sub>56</sub> O <sub>88</sub> P <sub>15</sub> S <sub>15</sub> | 1353.393445  | -0.190 | -4 | M - 5H                        |
| 1353.645306 | 233.7 | C <sub>172</sub> H <sub>213</sub> N <sub>56</sub> O <sub>88</sub> P <sub>15</sub> S <sub>15</sub> | 1353.645264  | -0.030 | -4 | M - 4H                        |
| 1353.646583 |       |                                                                                                   | 1353.645264  | -0.974 |    |                               |
| 1365.791868 | 23.8  | C <sub>126</sub> H <sub>157</sub> N <sub>44</sub> O <sub>66</sub> P <sub>12</sub> S <sub>12</sub> | 1365.793265  | 1.020  | -3 | w12                           |
| 1366.635676 | 38.0  | C <sub>86</sub> H <sub>105</sub> N <sub>30</sub> O <sub>42</sub> P <sub>8</sub> S <sub>8</sub>    | 1366.634286  | -1.020 | -2 | x8 - H2O                      |
| 1367.127699 | 46.2  | C <sub>86</sub> H <sub>104</sub> N <sub>29</sub> O <sub>43</sub> P <sub>8</sub> S <sub>8</sub>    | 1367.126294  | -1.030 | -2 | x8 - NH3                      |
| 1370.127455 | 84.8  | C <sub>84</sub> H <sub>104</sub> N <sub>30</sub> O <sub>44</sub> P <sub>8</sub> S <sub>8</sub>    | 1370.125288  | -1.580 | -2 | w8 - C2H4                     |
| 1371.131351 | 37.5  | C <sub>84</sub> H <sub>106</sub> N <sub>30</sub> O <sub>44</sub> P <sub>8</sub> S <sub>8</sub>    | 1371.132839  | 1.090  | -2 | w8 - C2H2                     |
| 1371.627848 | 20.4  | C <sub>86</sub> H <sub>107</sub> N <sub>26</sub> O <sub>46</sub> P <sub>8</sub> S <sub>8</sub>    | 1371.625793  | -1.500 | -2 | c8                            |
| 1375.124564 | 48.1  | C <sub>131</sub> H <sub>161</sub> N <sub>38</sub> O <sub>69</sub> P <sub>12</sub> S <sub>12</sub> | 1375.125798  | 0.900  | -3 | a13 - B(A) -<br>H2O, a13 - 5H |
| 1378.614239 | 25.0  | C <sub>86</sub> H <sub>105</sub> N <sub>26</sub> O <sub>47</sub> P <sub>8</sub> S <sub>8</sub>    | 1378.615151  | 0.660  | -2 | d8 - 5H                       |
| 1384.141093 | 87.3  | C <sub>86</sub> H <sub>108</sub> N <sub>30</sub> O <sub>44</sub> P <sub>8</sub> S <sub>8</sub>    | 1384.140939  | -0.110 | -2 | w8                            |
| 1395.129924 | 25.6  | C <sub>131</sub> H <sub>163</sub> N <sub>41</sub> O <sub>70</sub> P <sub>12</sub> S <sub>12</sub> | 1395.132394  | 1.770  | -3 | y13 - 4H                      |
| 1431.158185 | 43.8  | C <sub>46</sub> H <sub>59</sub> N <sub>12</sub> O <sub>25</sub> P <sub>4</sub> S <sub>4</sub>     | 1431.155861  | -1.620 | -1 | d4                            |
| 1455.179913 | 106.2 | C <sub>46</sub> H <sub>59</sub> N <sub>16</sub> O <sub>23</sub> P <sub>4</sub> S <sub>4</sub>     | 1455.178328  | -1.090 | -1 | w4                            |
| 1556.655824 | 19.6  | C <sub>96</sub> H <sub>120</sub> N <sub>35</sub> O <sub>49</sub> P <sub>9</sub> S <sub>9</sub>    | 1556.655777  | -0.030 | -2 | w9                            |
| 1557.157232 | 49.2  | C <sub>148</sub> H <sub>178</sub> O <sub>74</sub> N <sub>51</sub> P <sub>13</sub> S <sub>13</sub> | 1557.157113  | -0.080 | -3 | z14 - 6H                      |
| 1568.143761 | 19.2  | C <sub>146</sub> H <sub>182</sub> O <sub>76</sub> N <sub>48</sub> P <sub>14</sub> S <sub>14</sub> | 1568.143026  | -0.470 | -3 | c14 - OC2H2                   |
| 1636.218643 | 40.5  | C <sub>56</sub> H <sub>68</sub> N <sub>14</sub> O <sub>28</sub> P <sub>4</sub> S <sub>4</sub>     | 1636.217178  | -0.900 | -1 | a5 - 2H                       |
| 1637.224842 | 78.6  | C <sub>56</sub> H <sub>69</sub> N <sub>14</sub> O <sub>28</sub> P <sub>4</sub> S <sub>4</sub>     | 1637.225003  | 0.100  | -1 | b5 - H2O, a5                  |
| 1650.145239 | 27.2  | C <sub>51</sub> H <sub>65</sub> N <sub>15</sub> O <sub>28</sub> P <sub>5</sub> S <sub>5</sub>     | 1650.142610  | -1.590 | -1 | w5 - B(mC)                    |
| 1805.192593 | 135.2 | C <sub>172</sub> H <sub>214</sub> N <sub>56</sub> O <sub>88</sub> P <sub>15</sub> S <sub>15</sub> | 1805.196111  | 1.950  | -3 | M - 3H                        |
| 1805.192594 | 135.2 | C <sub>59</sub> H <sub>74</sub> N <sub>14</sub> O <sub>32</sub> P <sub>5</sub> S <sub>5</sub>     | 1805.189620  | -1.650 | -1 | a6 - B(T) -<br>C2H2           |
| 1805.196082 |       |                                                                                                   |              |        |    |                               |
| 1812.187044 | 60.8  | C <sub>116</sub> H <sub>140</sub> N <sub>37</sub> O <sub>59</sub> P <sub>10</sub> S <sub>10</sub> | 1812.184592  | -1.350 | -2 | a11 - NH2                     |
| 1820.180831 | 70.8  | C <sub>61</sub> H <sub>75</sub> N <sub>11</sub> O <sub>34</sub> P <sub>5</sub> S <sub>5</sub>     | 1820.178052  | -1.530 | -1 | a6 - 3H                       |
| 1821.189437 | 44.7  | C <sub>116</sub> H <sub>142</sub> N <sub>37</sub> O <sub>60</sub> P <sub>10</sub> S <sub>10</sub> | 1821.189600  | 0.090  | -2 | b11 - NH2                     |
|             |       |                                                                                                   | Abs mean     | 0.679  |    |                               |
|             |       |                                                                                                   | error        |        |    |                               |
|             |       |                                                                                                   | Abs mean std | 0.532  |    |                               |
|             |       |                                                                                                   | dev          |        |    |                               |



|          |       |
|----------|-------|
| error    |       |
| Abs mean | 1.370 |
| std dev  |       |

---







|             |      |                                          |             |        |    |                                       |
|-------------|------|------------------------------------------|-------------|--------|----|---------------------------------------|
| 1098.110131 | 27.4 | $C_{71}H_{84}N_{23}O_{35}P_6S_6$         | 1098.113057 | 2.660  | -2 | B(dA) - H2O                           |
| 1098.444620 | 16.9 | $C_{106}H_{128}N_{32}O_{55}P_9S_9$       | 1098.444807 | 0.170  | -3 | z7 - 5H                               |
| 1098.776345 | 25.7 | $C_{105}H_{127}N_{33}O_{55}P_9S_9$       | 1098.776557 | 0.190  | -3 | b10 - NH3                             |
| 1151.130421 | 11.3 | $C_{76}H_{92}N_{20}O_{40}P_6S_6$         | 1151.127306 | -2.710 | -2 | b10 - CH4                             |
| 1151.630570 | 12.5 | $C_{76}H_{93}N_{20}O_{40}P_6S_6$         | 1151.630945 | 0.330  | -2 | b7 - NH3                              |
| 1153.433485 | 36.1 | $C_{109}H_{132}N_{33}O_{58}P_{10}S_{10}$ | 1153.433307 | -0.150 | -3 | b7 - NH2                              |
| 1214.115839 | 12.4 | $C_{153}H_{186}O_{80}N_{48}P_{14}S_{14}$ | 1214.110146 | -4.690 | -4 | a11 - B(G) - C2H4                     |
| 1259.106145 | 21.1 | $C_{81}H_{95}N_{23}O_{43}P_7S_7$         | 1259.108669 | 2.000  | -2 | a15 - B(dG) - C2H4, z15 - B(G) - C2H4 |
| 1260.104192 | 30.1 | $C_{119}H_{145}N_{35}O_{64}P_{11}S_{11}$ | 1260.107522 | 2.640  | -3 | a8 - 5H                               |
| 1329.108128 | 10.4 | $C_{41}H_{51}N_{13}O_{22}P_4S_4$         | 1329.111043 | 2.190  | -1 | a12 - B(G) - C2H4                     |
| 1354.116802 | 39.3 | $C_{126}H_{154}N_{44}O_{64}P_{12}S_{12}$ | 1354.122164 | 3.960  | -3 | w4 - 2H                               |
| 1554.823124 | 9.4  | $C_{146}H_{179}O_{75}N_{51}P_{13}S_{13}$ | 1554.824509 | 0.890  | -3 | x12 - H2O                             |
|             |      |                                          | Abs mean    | 1.649  |    | y14 - C2H4                            |
|             |      |                                          | error       |        |    |                                       |
|             |      |                                          | Abs mean    | 1.238  |    |                                       |
|             |      |                                          | std dev     |        |    |                                       |

---

**Table S13 showing peak list, intensity, elemental composition, and possible assignments with mass errors (ppm) of danvatirsen using 2D-UVPD-MS of one scan denoised (sane rank 10) [M-8H]<sup>8-</sup> precursor ion (note, noise peaks were included to highlight the effect of denoising).**

| Measured<br><i>mz</i> | Intensity  | Elemental<br>Composition                                                                      | Theoretical<br><i>mz</i> | Error<br>(ppm) | Charge | Assignment |
|-----------------------|------------|-----------------------------------------------------------------------------------------------|--------------------------|----------------|--------|------------|
| 225.560984            | 1740907.0  |                                                                                               |                          |                |        |            |
| 225.564220            | 2472008.7  |                                                                                               |                          |                |        |            |
| 338.157749            | 13274609.6 |                                                                                               |                          |                |        |            |
| 338.167652            | 1797371.3  |                                                                                               |                          |                |        |            |
| 338.210996            | 4110571.8  |                                                                                               |                          |                |        |            |
| 338.220422            | 29988344.8 |                                                                                               |                          |                |        |            |
| 338.229929            | 4303612.9  |                                                                                               |                          |                |        |            |
| 338.274284            | 3284753.3  |                                                                                               |                          |                |        |            |
| 338.283048            | 33029211.8 |                                                                                               |                          |                |        |            |
| 338.292211            | 4172903.8  |                                                                                               |                          |                |        |            |
| 338.344567            | 7808075.3  |                                                                                               |                          |                |        |            |
| 338.400417            | 2226435.6  |                                                                                               |                          |                |        |            |
| 338.408269            | 14765760.8 |                                                                                               |                          |                |        |            |
| 338.416373            | 2010386.8  |                                                                                               |                          |                |        |            |
| 338.462275            | 1705712.6  |                                                                                               |                          |                |        |            |
| 338.470583            | 22471378.7 |                                                                                               |                          |                |        |            |
| 338.478993            | 1819578.4  |                                                                                               |                          |                |        |            |
| 338.533041            | 18285322.3 |                                                                                               |                          |                |        |            |
| 338.543014            | 2596628.7  |                                                                                               |                          |                |        |            |
| 338.595163            | 7180541.1  |                                                                                               |                          |                |        |            |
| 338.657361            | 2040699.1  |                                                                                               |                          |                |        |            |
| 338.658672            | 1770008.4  |                                                                                               |                          |                |        |            |
| 338.720658            | 1827530.5  |                                                                                               |                          |                |        |            |
| 339.866196            | 2043140.2  |                                                                                               |                          |                |        |            |
| 541.254272            | 2122260.4  |                                                                                               |                          |                |        |            |
| 601.395200            | 3262256.6  |                                                                                               |                          |                |        |            |
| 609.308001            | 3269107.6  | C <sub>76</sub> H <sub>98</sub> N <sub>25</sub> O <sub>40</sub> P <sub>7</sub> S <sub>7</sub> | 609.308004               | 0.005          | -4     | w7         |
| 657.563909            | 2050827.9  |                                                                                               |                          |                |        |            |
| 657.593028            | 3516477.7  |                                                                                               |                          |                |        |            |
| 659.438177            | 3118306.4  |                                                                                               |                          |                |        |            |
| 659.565777            | 4440149.1  |                                                                                               |                          |                |        |            |
| 659.689513            | 11226883.5 |                                                                                               |                          |                |        |            |
| 659.815492            | 10058763.5 |                                                                                               |                          |                |        |            |
| 659.938761            | 4761343.7  |                                                                                               |                          |                |        |            |
| 673.823356            | 1858546.2  |                                                                                               |                          |                |        |            |
| 673.948559            | 1788057.1  |                                                                                               |                          |                |        |            |
| 674.072977            | 2127635.3  |                                                                                               |                          |                |        |            |
| 674.091895            | 4450368.8  | C <sub>66</sub> H <sub>84</sub> N <sub>23</sub> O <sub>32</sub> P <sub>5</sub> S <sub>5</sub> | 674.090870               | -1.521         | -3     | y6         |
| 674.323228            | 17057623.6 |                                                                                               |                          |                |        |            |
| 674.448454            | 37431606.0 |                                                                                               |                          |                |        |            |
| 674.535295            | 2237489.1  |                                                                                               |                          |                |        |            |
| 674.547643            | 1847308.9  |                                                                                               |                          |                |        |            |
| 674.573701            | 56003409.2 |                                                                                               |                          |                |        |            |
| 674.659884            | 2463284.7  |                                                                                               |                          |                |        |            |
| 674.698669            | 68020902.2 |                                                                                               |                          |                |        |            |
| 674.722873            | 2284603.4  |                                                                                               |                          |                |        |            |
| 674.735919            | 1879203.5  |                                                                                               |                          |                |        |            |
| 674.784842            | 2426621.4  |                                                                                               |                          |                |        |            |
| 674.799736            | 2130285.2  |                                                                                               |                          |                |        |            |

|            |             |                                                                                     |            |       |           |
|------------|-------------|-------------------------------------------------------------------------------------|------------|-------|-----------|
| 674.823907 | 61461539.8  |                                                                                     |            |       |           |
| 674.909703 | 2818066.0   |                                                                                     |            |       |           |
| 674.924147 | 2034247.5   |                                                                                     |            |       |           |
| 674.948773 | 49187437.3  |                                                                                     |            |       |           |
| 675.073537 | 30691037.1  |                                                                                     |            |       |           |
| 675.198378 | 22544211.6  |                                                                                     |            |       |           |
| 675.323175 | 13207262.5  |                                                                                     |            |       |           |
| 675.447751 | 9029169.8   |                                                                                     |            |       |           |
| 675.573842 | 4935024.4   |                                                                                     |            |       |           |
| 675.692539 | 2450861.8   |                                                                                     |            |       |           |
| 676.065599 | 2180528.4   |                                                                                     |            |       |           |
| 676.078851 | 2806215.3   |                                                                                     |            |       |           |
| 676.100736 | 2088056.5   |                                                                                     |            |       |           |
| 676.118543 | 2148572.7   |                                                                                     |            |       |           |
| 676.135623 | 2144589.3   |                                                                                     |            |       |           |
| 676.145012 | 2129377.5   |                                                                                     |            |       |           |
| 676.153393 | 1780000.6   |                                                                                     |            |       |           |
| 676.163327 | 2344002.6   |                                                                                     |            |       |           |
| 676.172063 | 2537847.0   |                                                                                     |            |       |           |
| 676.181199 | 2301547.2   |                                                                                     |            |       |           |
| 676.205386 | 4392098.2   |                                                                                     |            |       |           |
| 676.217123 | 3406627.8   |                                                                                     |            |       |           |
| 676.223742 | 3589781.0   |                                                                                     |            |       |           |
| 676.235204 | 5127274.1   |                                                                                     |            |       |           |
| 676.252274 | 6424758.7   |                                                                                     |            |       |           |
| 676.260528 | 5780503.6   |                                                                                     |            |       |           |
| 676.271499 | 9646054.7   |                                                                                     |            |       |           |
| 676.282903 | 20794313.8  |                                                                                     |            |       |           |
| 676.295290 | 18312119.5  |                                                                                     |            |       |           |
| 676.320085 | 580758939.5 | C <sub>172</sub> H <sub>217</sub> N <sub>56</sub> O <sub>88</sub> P <sub>15</sub> S | 676.318994 | 1.613 | -8 M - 8H |
|            |             | 15                                                                                  |            |       |           |
| 676.344300 | 22219809.5  |                                                                                     |            |       |           |
| 676.361034 | 16823494.2  |                                                                                     |            |       |           |
| 676.378127 | 14278468.8  |                                                                                     |            |       |           |
| 676.384332 | 15371881.0  |                                                                                     |            |       |           |
| 676.408048 | 62122979.4  |                                                                                     |            |       |           |
| 676.419374 | 45851471.6  |                                                                                     |            |       |           |
| 676.445526 | 1339304528. |                                                                                     |            |       |           |
|            | 0           |                                                                                     |            |       |           |
| 676.468426 | 50599789.7  |                                                                                     |            |       |           |
| 676.479270 | 30373811.2  |                                                                                     |            |       |           |
| 676.486515 | 37018959.8  |                                                                                     |            |       |           |
| 676.496340 | 23991641.2  |                                                                                     |            |       |           |
| 676.505292 | 28265522.1  |                                                                                     |            |       |           |
| 676.514315 | 27569320.6  |                                                                                     |            |       |           |
| 676.532633 | 111341706.7 |                                                                                     |            |       |           |
| 676.543660 | 66244585.8  |                                                                                     |            |       |           |
| 676.570704 | 2111879384. |                                                                                     |            |       |           |
|            | 0           |                                                                                     |            |       |           |
| 676.591682 | 77138646.0  |                                                                                     |            |       |           |
| 676.602485 | 38581643.8  |                                                                                     |            |       |           |
| 676.611245 | 56017752.0  |                                                                                     |            |       |           |
| 676.619805 | 35327541.9  |                                                                                     |            |       |           |
| 676.629566 | 38745838.0  |                                                                                     |            |       |           |
| 676.638135 | 37636107.8  |                                                                                     |            |       |           |
| 676.657391 | 134932471.9 |                                                                                     |            |       |           |
| 676.678822 | 78977449.1  |                                                                                     |            |       |           |
| 676.695805 | 2350566485. |                                                                                     |            |       |           |
|            | 0           |                                                                                     |            |       |           |
| 676.712388 | 98535232.1  |                                                                                     |            |       |           |

|            |             |                                                                                     |            |       |    |           |
|------------|-------------|-------------------------------------------------------------------------------------|------------|-------|----|-----------|
| 676.735977 | 57888830.8  |                                                                                     |            |       |    |           |
| 676.743430 | 38234956.9  |                                                                                     |            |       |    |           |
| 676.753984 | 39163516.0  |                                                                                     |            |       |    |           |
| 676.762387 | 36657561.8  |                                                                                     |            |       |    |           |
| 676.782190 | 135459408.5 |                                                                                     |            |       |    |           |
| 676.798742 | 59106797.0  |                                                                                     |            |       |    |           |
| 676.820847 | 1997254297. |                                                                                     |            |       |    |           |
|            | 0           |                                                                                     |            |       |    |           |
| 676.860725 | 46553219.5  |                                                                                     |            |       |    |           |
| 676.878336 | 28267141.3  |                                                                                     |            |       |    |           |
| 676.886779 | 27660163.1  |                                                                                     |            |       |    |           |
| 676.907227 | 102686862.1 |                                                                                     |            |       |    |           |
| 676.922568 | 47285898.1  |                                                                                     |            |       |    |           |
| 676.945876 | 1411811359. |                                                                                     |            |       |    |           |
|            | 0           |                                                                                     |            |       |    |           |
| 676.969582 | 43747164.1  |                                                                                     |            |       |    |           |
| 676.985820 | 31085876.2  |                                                                                     |            |       |    |           |
| 677.003045 | 17155473.3  |                                                                                     |            |       |    |           |
| 677.010916 | 18459769.4  |                                                                                     |            |       |    |           |
| 677.021893 | 17805846.9  |                                                                                     |            |       |    |           |
| 677.032659 | 71536844.3  |                                                                                     |            |       |    |           |
| 677.046896 | 33613996.8  |                                                                                     |            |       |    |           |
| 677.070880 | 963963387.5 |                                                                                     |            |       |    |           |
| 677.094343 | 31652416.6  |                                                                                     |            |       |    |           |
| 677.111923 | 20645959.6  |                                                                                     |            |       |    |           |
| 677.137091 | 12670373.2  |                                                                                     |            |       |    |           |
| 677.157634 | 46554603.2  |                                                                                     |            |       |    |           |
| 677.171432 | 20250897.5  |                                                                                     |            |       |    |           |
| 677.195922 | 576079625.1 |                                                                                     |            |       |    |           |
| 677.219610 | 20068370.3  |                                                                                     |            |       |    |           |
| 677.236802 | 16159955.5  |                                                                                     |            |       |    |           |
| 677.256205 | 6415461.7   |                                                                                     |            |       |    |           |
| 677.264974 | 5188949.7   |                                                                                     |            |       |    |           |
| 677.282556 | 26628410.7  |                                                                                     |            |       |    |           |
| 677.296078 | 10506439.6  |                                                                                     |            |       |    |           |
| 677.320901 | 325071932.9 |                                                                                     |            |       |    |           |
| 677.362171 | 6998622.8   |                                                                                     |            |       |    |           |
| 677.381444 | 3350581.1   |                                                                                     |            |       |    |           |
| 677.389528 | 3739625.4   |                                                                                     |            |       |    |           |
| 677.407635 | 15733209.3  |                                                                                     |            |       |    |           |
| 677.423273 | 8847064.1   |                                                                                     |            |       |    |           |
| 677.446092 | 198508193.9 |                                                                                     |            |       |    |           |
| 677.468717 | 6911910.0   |                                                                                     |            |       |    |           |
| 677.487278 | 5293095.1   |                                                                                     |            |       |    |           |
| 677.506029 | 2699582.5   |                                                                                     |            |       |    |           |
| 677.523533 | 4005081.7   |                                                                                     |            |       |    |           |
| 677.537127 | 2163110.9   |                                                                                     |            |       |    |           |
| 677.545980 | 3643438.6   |                                                                                     |            |       |    |           |
| 677.571123 | 105726269.4 |                                                                                     |            |       |    |           |
| 677.611501 | 2599049.5   |                                                                                     |            |       |    |           |
| 677.623226 | 2910797.4   |                                                                                     |            |       |    |           |
| 677.635895 | 1997353.2   |                                                                                     |            |       |    |           |
| 677.696235 | 50105838.7  |                                                                                     |            |       |    |           |
| 677.722206 | 2848457.4   |                                                                                     |            |       |    |           |
| 677.736037 | 3087685.5   |                                                                                     |            |       |    |           |
| 677.820732 | 22422530.6  |                                                                                     |            |       |    |           |
| 677.852572 | 2792964.6   | C <sub>106</sub> H <sub>132</sub> N <sub>32</sub> O <sub>57</sub> P <sub>10</sub> S | 677.852671 | 0.146 | -5 | d10 - NH3 |
|            |             | 10                                                                                  |            |       |    |           |
| 677.946112 | 12247984.5  |                                                                                     |            |       |    |           |
| 678.071480 | 5548593.8   |                                                                                     |            |       |    |           |

|            |            |                                                                                     |            |       |    |                     |
|------------|------------|-------------------------------------------------------------------------------------|------------|-------|----|---------------------|
| 678.196834 | 3536380.4  |                                                                                     |            |       |    |                     |
| 678.445351 | 2181286.8  |                                                                                     |            |       |    |                     |
| 678.569593 | 2856942.2  |                                                                                     |            |       |    |                     |
| 678.693505 | 2741105.0  |                                                                                     |            |       |    |                     |
| 678.819365 | 2729577.9  |                                                                                     |            |       |    |                     |
| 679.068017 | 10559204.8 |                                                                                     |            |       |    |                     |
| 679.193229 | 22486782.5 |                                                                                     |            |       |    |                     |
| 679.279147 | 2241412.7  |                                                                                     |            |       |    |                     |
| 679.318342 | 32462966.6 |                                                                                     |            |       |    |                     |
| 679.404787 | 2142412.0  |                                                                                     |            |       |    |                     |
| 679.443163 | 30698988.8 |                                                                                     |            |       |    |                     |
| 679.568268 | 23207713.5 |                                                                                     |            |       |    |                     |
| 679.693517 | 13508959.9 |                                                                                     |            |       |    |                     |
| 679.817806 | 10603946.2 |                                                                                     |            |       |    |                     |
| 679.942452 | 6982888.2  |                                                                                     |            |       |    |                     |
| 680.068072 | 1945161.3  |                                                                                     |            |       |    |                     |
| 681.064186 | 1764848.4  |                                                                                     |            |       |    |                     |
| 681.314001 | 2140946.8  |                                                                                     |            |       |    |                     |
| 681.440422 | 1812207.1  |                                                                                     |            |       |    |                     |
| 681.563700 | 2356112.3  |                                                                                     |            |       |    |                     |
| 681.689731 | 1751704.1  |                                                                                     |            |       |    |                     |
| 682.395270 | 1796795.4  |                                                                                     |            |       |    |                     |
| 690.736136 | 2533836.5  |                                                                                     |            |       |    |                     |
| 690.835788 | 2695622.2  |                                                                                     |            |       |    |                     |
| 690.936476 | 2756918.8  |                                                                                     |            |       |    |                     |
| 691.036522 | 1769547.3  |                                                                                     |            |       |    |                     |
| 727.677437 | 2355547.0  |                                                                                     |            |       |    |                     |
| 743.583622 | 3098158.1  |                                                                                     |            |       |    |                     |
| 747.737399 | 2852872.5  |                                                                                     |            |       |    |                     |
| 767.091580 | 2938220.4  |                                                                                     |            |       |    |                     |
| 767.921573 | 2204085.1  |                                                                                     |            |       |    |                     |
| 767.931630 | 3340896.7  |                                                                                     |            |       |    |                     |
| 768.252927 | 2608376.5  |                                                                                     |            |       |    |                     |
| 768.263279 | 5783073.2  |                                                                                     |            |       |    |                     |
| 770.042671 | 2527418.5  |                                                                                     |            |       |    |                     |
| 773.226061 | 2336579.4  |                                                                                     |            |       |    |                     |
| 773.367236 | 3279493.3  |                                                                                     |            |       |    |                     |
| 773.610044 | 1995741.1  |                                                                                     |            |       |    |                     |
| 773.653205 | 3660735.6  |                                                                                     |            |       |    |                     |
| 778.786238 | 2204170.1  |                                                                                     |            |       |    |                     |
| 778.794185 | 2261073.8  |                                                                                     |            |       |    |                     |
| 779.507799 | 2753107.3  |                                                                                     |            |       |    |                     |
| 791.478522 | 4869501.5  | C <sub>126</sub> H <sub>157</sub> N <sub>40</sub> O <sub>65</sub> P <sub>11</sub> S | 791.477745 | -     | -5 | a12 - 2H, b12 - H2O |
|            |            | 11                                                                                  |            | 0.982 |    |                     |
| 791.683635 | 5265322.7  |                                                                                     |            |       |    |                     |
| 809.244518 | 2646074.0  |                                                                                     |            |       |    |                     |
| 809.412924 | 2200580.8  |                                                                                     |            |       |    |                     |
| 809.583106 | 2998124.0  |                                                                                     |            |       |    |                     |
| 819.077302 | 2653843.8  |                                                                                     |            |       |    |                     |
| 819.275993 | 9287857.0  | C <sub>130</sub> H <sub>165</sub> N <sub>38</sub> O <sub>68</sub> P <sub>12</sub> S | 819.275150 | -     | -5 | a13 - B(G) - OCH2   |
|            |            | 12                                                                                  |            | 1.029 |    |                     |
| 819.476652 | 10400434.6 | C <sub>126</sub> H <sub>162</sub> N <sub>44</sub> O <sub>66</sub> P <sub>12</sub> S | 819.476178 | -     | -5 | w12 + 2H            |
|            |            | 12                                                                                  |            | 0.578 |    |                     |
| 819.678017 | 5160140.4  |                                                                                     |            |       |    |                     |
| 860.490217 | 9847022.2  |                                                                                     |            |       |    |                     |
| 860.689693 | 14997227.1 | C <sub>136</sub> H <sub>172</sub> N <sub>46</sub> O <sub>69</sub> P <sub>12</sub> S | 860.690007 | 0.365 | -5 | z13                 |
|            |            | 12                                                                                  |            |       |    |                     |
| 860.890018 | 10153079.3 | C <sub>136</sub> H <sub>173</sub> N <sub>46</sub> O <sub>69</sub> P <sub>12</sub> S | 860.891572 | 1.805 | -5 | z13 + 1H            |
|            |            | 12                                                                                  |            |       |    |                     |
| 861.088815 | 1995140.7  |                                                                                     |            |       |    |                     |

|            |            |                                                                                                   |            |                  |       |                                  |
|------------|------------|---------------------------------------------------------------------------------------------------|------------|------------------|-------|----------------------------------|
| 863.542342 | 19006860.3 |                                                                                                   |            |                  |       |                                  |
| 863.741353 | 1864584.5  |                                                                                                   |            |                  |       |                                  |
| 863.909425 | 2606768.0  |                                                                                                   |            |                  |       |                                  |
| 864.169711 | 8249064.0  |                                                                                                   |            |                  |       |                                  |
| 864.297983 | 3699198.2  |                                                                                                   |            |                  |       |                                  |
| 876.752174 | 3013012.7  |                                                                                                   |            |                  |       |                                  |
| 876.915628 | 3664065.8  |                                                                                                   |            |                  |       |                                  |
| 881.253695 | 1825487.9  |                                                                                                   |            |                  |       |                                  |
| 884.441921 | 2120013.3  | C <sub>86</sub> H <sub>107</sub> N <sub>30</sub> O <sub>41</sub> P <sub>7</sub> S <sub>7</sub>    | 884.440000 | -                | -3    | y8 - H2O, z8 - 2H                |
|            |            |                                                                                                   |            | 2.172            |       |                                  |
| 884.779648 | 2827743.2  |                                                                                                   |            |                  |       |                                  |
| 901.760280 | 22683477.4 |                                                                                                   |            |                  |       |                                  |
| 901.860281 | 3628281.9  |                                                                                                   |            |                  |       |                                  |
| 901.927567 | 47903549.5 |                                                                                                   |            |                  |       |                                  |
| 901.958943 | 2013722.9  |                                                                                                   |            |                  |       |                                  |
| 902.125126 | 2549807.9  |                                                                                                   |            |                  |       |                                  |
| 902.257288 | 38775853.6 |                                                                                                   |            |                  |       |                                  |
| 902.272893 | 9774832.1  |                                                                                                   |            |                  |       |                                  |
| 902.364671 | 2078123.6  |                                                                                                   |            |                  |       |                                  |
| 902.418674 | 4541622.7  |                                                                                                   |            |                  |       |                                  |
| 902.430634 | 4835952.5  |                                                                                                   |            |                  |       |                                  |
| 902.512413 | 2404363.3  |                                                                                                   |            |                  |       |                                  |
| 903.088727 | 12502482.5 | C <sub>143</sub> H <sub>183</sub> N <sub>43</sub> O <sub>75</sub> P <sub>13</sub> S <sub>13</sub> | 903.088442 | -                | -5    | b14 - B(G) + 1H, a14 - B(A) + 2H |
|            |            |                                                                                                   |            | 0.316            |       |                                  |
| 903.103364 | 5340552.8  |                                                                                                   |            |                  |       |                                  |
| 987.350404 | 4244072.5  |                                                                                                   |            |                  |       |                                  |
| 987.492629 | 2520404.9  |                                                                                                   |            |                  |       |                                  |
| 1029.43091 | 1801827.3  | C <sub>96</sub> H <sub>122</sub> N <sub>31</sub> O <sub>51</sub> P <sub>9</sub> S <sub>9</sub>    | 1029.42708 | -                | -3    | d9                               |
| 1          |            |                                                                                                   | 8          | 3.714            |       |                                  |
| 1353.88927 | 8821596.1  |                                                                                                   |            |                  |       |                                  |
| 0          |            |                                                                                                   |            |                  |       |                                  |
| 1354.14040 | 12422843.9 |                                                                                                   |            |                  |       |                                  |
| 5          |            |                                                                                                   |            |                  |       |                                  |
| 1354.39487 | 21162897.4 |                                                                                                   |            |                  |       |                                  |
| 1          |            |                                                                                                   |            |                  |       |                                  |
| 1354.63083 | 11556415.2 |                                                                                                   |            |                  |       |                                  |
| 6          |            |                                                                                                   |            |                  |       |                                  |
| 1354.88626 | 9707054.5  |                                                                                                   |            |                  |       |                                  |
| 2          |            |                                                                                                   |            |                  |       |                                  |
| 1355.12956 | 8243090.6  |                                                                                                   |            |                  |       |                                  |
| 3          |            |                                                                                                   |            |                  |       |                                  |
| 1382.88898 | 4191613.4  |                                                                                                   |            |                  |       |                                  |
| 3          |            |                                                                                                   |            |                  |       |                                  |
|            |            |                                                                                                   |            | Abs mean error   | 1.254 |                                  |
|            |            |                                                                                                   |            | Abs mean std dev | 1.193 |                                  |

**Table S14 showing peak list, intensity, elemental composition, and possible assignments with mass errors (ppm) of danvatirsen using 2D-UVPD-MS of one scan denoised (same rank 10) [M-7H]<sup>7-</sup> precursor ion (note, noise peaks were included to highlight the effect of denoising).**

| Measured<br><i>mz</i> | Intensity  | Elemental<br>Composition                                                                          | Theoretical<br><i>mz</i> | Error<br>(ppm) | Charge | Assignment                     |
|-----------------------|------------|---------------------------------------------------------------------------------------------------|--------------------------|----------------|--------|--------------------------------|
| 255.866784            | 3610139.0  |                                                                                                   |                          |                |        |                                |
| 383.685103            | 6199175.2  |                                                                                                   |                          |                |        |                                |
| 383.741385            | 3294117.3  |                                                                                                   |                          |                |        |                                |
| 383.785554            | 1752580.9  |                                                                                                   |                          |                |        |                                |
| 383.841110            | 4109102.5  |                                                                                                   |                          |                |        |                                |
| 383.852558            | 32505181.8 |                                                                                                   |                          |                |        |                                |
| 383.864384            | 3734794.7  |                                                                                                   |                          |                |        |                                |
| 383.896892            | 5396112.4  |                                                                                                   |                          |                |        |                                |
| 383.907975            | 37886865.6 |                                                                                                   |                          |                |        |                                |
| 383.916111            | 2055700.2  |                                                                                                   |                          |                |        |                                |
| 383.920011            | 4260967.5  |                                                                                                   |                          |                |        |                                |
| 383.952070            | 4188873.8  |                                                                                                   |                          |                |        |                                |
| 383.975584            | 3866152.2  |                                                                                                   |                          |                |        |                                |
| 384.008704            | 2717526.8  |                                                                                                   |                          |                |        |                                |
| 384.019105            | 22050820.7 | C <sub>61</sub> H <sub>75</sub> N <sub>14</sub> O <sub>34</sub> P <sub>6</sub> S <sub>6</sub>     | 384.019125               | 0.052          | -5     | c6 - B(T) - 4H                 |
| 384.031185            | 2687780.2  |                                                                                                   |                          |                |        |                                |
| 384.074861            | 11964750.5 |                                                                                                   |                          |                |        |                                |
| 384.130517            | 4955578.4  |                                                                                                   |                          |                |        |                                |
| 386.682179            | 3568937.3  |                                                                                                   |                          |                |        |                                |
| 386.753409            | 4976781.3  |                                                                                                   |                          |                |        |                                |
| 386.826135            | 2222056.2  | C <sub>60</sub> H <sub>77</sub> N <sub>18</sub> O <sub>32</sub> P <sub>6</sub> S <sub>6</sub>     | 386.826749               | 1.587          | -5     | x6 - B(dA) - OCH <sub>2</sub>  |
| 601.619497            | 1734570.2  |                                                                                                   |                          |                |        |                                |
| 676.537841            | 7016826.7  |                                                                                                   |                          |                |        |                                |
| 676.687643            | 2052718.8  |                                                                                                   |                          |                |        |                                |
| 676.696758            | 4411751.5  |                                                                                                   |                          |                |        |                                |
| 676.703219            | 3615941.3  |                                                                                                   |                          |                |        |                                |
| 676.910633            | 1837422.4  |                                                                                                   |                          |                |        |                                |
| 728.078860            | 1877272.6  | C <sub>116</sub> H <sub>147</sub> N <sub>38</sub> O <sub>59</sub> P <sub>10</sub> S <sub>10</sub> | 728.077801               | -1.455         | -5     | a11 + 1H                       |
| 753.789362            | 1916603.0  |                                                                                                   |                          |                |        |                                |
| 753.932308            | 2846057.6  |                                                                                                   |                          |                |        |                                |
| 754.076928            | 2843069.7  |                                                                                                   |                          |                |        |                                |
| 765.486704            | 5470247.4  |                                                                                                   |                          |                |        |                                |
| 765.598616            | 18593178.6 |                                                                                                   |                          |                |        |                                |
| 765.620524            | 1928865.2  |                                                                                                   |                          |                |        |                                |
| 765.656558            | 1864457.9  |                                                                                                   |                          |                |        |                                |
| 765.672307            | 1919043.1  | C <sub>120</sub> H <sub>150</sub> N <sub>41</sub> O <sub>61</sub> P <sub>11</sub> S <sub>11</sub> | 765.671473               | -1.089         | -5     | z12 - B(dC) - OCH <sub>2</sub> |
| 765.709871            | 35555376.1 |                                                                                                   |                          |                |        |                                |
| 765.767521            | 1907022.3  |                                                                                                   |                          |                |        |                                |
| 765.782199            | 2098160.3  |                                                                                                   |                          |                |        |                                |
| 765.799707            | 2178243.7  |                                                                                                   |                          |                |        |                                |
| 765.821254            | 51036461.4 |                                                                                                   |                          |                |        |                                |
| 765.853199            | 2909196.2  |                                                                                                   |                          |                |        |                                |
| 765.867040            | 2371613.8  |                                                                                                   |                          |                |        |                                |
| 765.877658            | 3872165.7  |                                                                                                   |                          |                |        |                                |
| 765.886565            | 3071598.8  |                                                                                                   |                          |                |        |                                |
| 765.898209            | 3082407.7  |                                                                                                   |                          |                |        |                                |
| 765.932594            | 60995960.3 |                                                                                                   |                          |                |        |                                |
| 765.961240            | 3547901.4  |                                                                                                   |                          |                |        |                                |
| 765.973399            | 2369344.2  |                                                                                                   |                          |                |        |                                |



|            |            |                                     |            |        |    |                   |  |
|------------|------------|-------------------------------------|------------|--------|----|-------------------|--|
| 765.987063 | 3572177.4  |                                     |            |        |    |                   |  |
| 766.006912 | 2597221.9  |                                     |            |        |    |                   |  |
| 766.020135 | 2963440.7  |                                     |            |        |    |                   |  |
| 766.043676 | 52661330.8 |                                     |            |        |    |                   |  |
| 766.101621 | 3560714.2  | $C_{24}H_{33}N_8O_{13}P_2S_2$       | 766.101098 | -0.683 | -1 | w2 + 1H           |  |
| 766.108141 | 3853459.5  |                                     |            |        |    |                   |  |
| 766.121009 | 2542394.1  |                                     |            |        |    |                   |  |
| 766.154759 | 45232279.5 |                                     |            |        |    |                   |  |
| 766.184661 | 3348837.5  |                                     |            |        |    |                   |  |
| 766.217333 | 3783983.4  |                                     |            |        |    |                   |  |
| 766.240870 | 2212025.4  |                                     |            |        |    |                   |  |
| 766.299480 | 2677083.8  |                                     |            |        |    |                   |  |
| 766.331287 | 3304060.1  |                                     |            |        |    |                   |  |
| 766.349189 | 2768007.0  |                                     |            |        |    |                   |  |
| 766.376922 | 24945135.7 |                                     |            |        |    |                   |  |
| 766.407599 | 2070950.1  |                                     |            |        |    |                   |  |
| 766.441326 | 2951904.9  |                                     |            |        |    |                   |  |
| 766.487377 | 17654784.0 |                                     |            |        |    |                   |  |
| 766.515635 | 2466585.8  |                                     |            |        |    |                   |  |
| 766.525831 | 2368096.8  |                                     |            |        |    |                   |  |
| 766.537297 | 2061383.2  |                                     |            |        |    |                   |  |
| 766.550353 | 2449211.0  |                                     |            |        |    |                   |  |
| 766.559308 | 2120471.4  | $C_{96}H_{117}N_{31}O_{50}P_9S_9$   | 766.559987 | 0.886  | -4 | c9 - 4H           |  |
| 766.570383 | 2259530.8  |                                     |            |        |    |                   |  |
| 766.599021 | 13251050.3 |                                     |            |        |    |                   |  |
| 766.617538 | 2218308.5  |                                     |            |        |    |                   |  |
| 766.629099 | 2633976.1  |                                     |            |        |    |                   |  |
| 766.664168 | 2337360.2  | $C_{121}H_{149}N_{36}O_{65}P_{11}S$ | 766.662765 | -1.830 | -5 | b12 - B(dC) - NH3 |  |
| 766.674746 | 2803935.7  | $C_{121}H_{155}N_{39}O_{62}P_{11}S$ | 766.677051 | 3.006  | -5 | z12 - B(G) + 1H   |  |
| 766.690267 | 2702162.2  |                                     |            |        |    |                   |  |
| 766.709871 | 10302585.7 |                                     |            |        |    |                   |  |
| 766.727220 | 2298247.2  |                                     |            |        |    |                   |  |
| 766.736073 | 2971896.1  |                                     |            |        |    |                   |  |
| 766.753360 | 6747767.9  | $C_{76}H_{95}N_{21}O_{39}P_6S_6$    | 766.754257 | 1.170  | -3 | a7 - 2H, b7 - H2O |  |
| 766.771698 | 2397581.4  |                                     |            |        |    |                   |  |
| 766.786353 | 3099421.9  |                                     |            |        |    |                   |  |
| 766.804256 | 2473975.0  |                                     |            |        |    |                   |  |
| 766.821253 | 6274008.7  |                                     |            |        |    |                   |  |
| 766.854889 | 3120224.6  |                                     |            |        |    |                   |  |
| 766.875622 | 3944690.7  | $C_{121}H_{154}N_{38}O_{63}P_{11}S$ | 766.873854 | -2.305 | -5 | a12 - B(T) + 2H   |  |
| 766.893792 | 3310180.6  |                                     |            |        |    |                   |  |
| 766.914077 | 3759782.2  |                                     |            |        |    |                   |  |
| 766.931663 | 4293272.8  |                                     |            |        |    |                   |  |
| 766.945012 | 3489362.9  |                                     |            |        |    |                   |  |
| 766.953696 | 3877626.5  |                                     |            |        |    |                   |  |
| 766.972928 | 3986802.1  |                                     |            |        |    |                   |  |
| 766.986408 | 3736664.8  |                                     |            |        |    |                   |  |
| 767.006257 | 4161383.1  |                                     |            |        |    |                   |  |
| 767.021789 | 4587019.4  |                                     |            |        |    |                   |  |
| 767.041195 | 4943503.7  |                                     |            |        |    |                   |  |
| 767.056040 | 4440188.1  | $C_{71}H_{91}N_{20}O_{40}P_7S_7$    | 767.056382 | 0.446  | -3 | w7 - B(dA) - 2H   |  |
| 767.114789 | 4995983.6  |                                     |            |        |    |                   |  |
| 767.128457 | 5098560.3  |                                     |            |        |    |                   |  |
| 767.148610 | 6199769.4  |                                     |            |        |    |                   |  |
| 767.178183 | 6631435.9  |                                     |            |        |    |                   |  |

|            |             |                                     |            |       |    |                 |  |
|------------|-------------|-------------------------------------|------------|-------|----|-----------------|--|
| 767.211453 | 14350596.5  |                                     |            |       |    |                 |  |
| 767.229466 | 11360473.6  |                                     |            |       |    |                 |  |
| 767.241873 | 11618142.8  |                                     |            |       |    |                 |  |
| 767.262443 | 222047526.9 | $C_{121}H_{150}N_{35}O_{66}P_{11}S$ | 767.262699 | 0.334 | -5 | b12 - B(A) - 4H |  |
|            |             | 11                                  |            |       |    |                 |  |
| 767.285734 | 16870471.9  |                                     |            |       |    |                 |  |
| 767.294989 | 14728073.6  |                                     |            |       |    |                 |  |
| 767.309831 | 16195969.8  |                                     |            |       |    |                 |  |
| 767.324213 | 42034796.5  |                                     |            |       |    |                 |  |
| 767.341398 | 31702363.4  |                                     |            |       |    |                 |  |
| 767.373809 | 716474776.7 |                                     |            |       |    |                 |  |
| 767.403635 | 32071767.9  |                                     |            |       |    |                 |  |
| 767.435111 | 73860612.1  |                                     |            |       |    |                 |  |
| 767.450305 | 46150230.4  |                                     |            |       |    |                 |  |
| 767.462600 | 52019126.3  |                                     |            |       |    |                 |  |
| 767.485102 | 1265463328. |                                     |            |       |    |                 |  |
|            | 0           |                                     |            |       |    |                 |  |
| 767.507995 | 62891969.5  |                                     |            |       |    |                 |  |
| 767.546637 | 93318894.0  |                                     |            |       |    |                 |  |
| 767.596192 | 1630032964. |                                     |            |       |    |                 |  |
|            | 0           |                                     |            |       |    |                 |  |
| 767.626958 | 63195576.9  |                                     |            |       |    |                 |  |
| 767.641596 | 42681428.6  |                                     |            |       |    |                 |  |
| 767.657797 | 103963924.9 |                                     |            |       |    |                 |  |
| 767.672803 | 63905629.8  |                                     |            |       |    |                 |  |
| 767.687654 | 79314927.2  |                                     |            |       |    |                 |  |
| 767.707599 | 1690442984. |                                     |            |       |    |                 |  |
|            | 0           |                                     |            |       |    |                 |  |
| 767.768268 | 104091117.3 |                                     |            |       |    |                 |  |
| 767.787465 | 51123877.9  |                                     |            |       |    |                 |  |
| 767.849930 | 55160123.4  |                                     |            |       |    |                 |  |
| 767.879429 | 87610450.2  |                                     |            |       |    |                 |  |
| 767.896258 | 45970103.8  |                                     |            |       |    |                 |  |
| 767.930045 | 1119068508. |                                     |            |       |    |                 |  |
|            | 0           |                                     |            |       |    |                 |  |
| 767.957614 | 46585594.5  |                                     |            |       |    |                 |  |
| 767.969230 | 22576520.5  |                                     |            |       |    |                 |  |
| 767.990770 | 67230563.8  |                                     |            |       |    |                 |  |
| 768.015884 | 27977467.8  |                                     |            |       |    |                 |  |
| 768.041067 | 803717200.6 |                                     |            |       |    |                 |  |
| 768.072482 | 30581480.7  | $C_{96}H_{123}N_{31}O_{50}P_9S_9$   | 768.071724 | -     | -4 | c9 + 2H         |  |
|            |             |                                     |            | 0.987 |    |                 |  |
| 768.101996 | 51124579.1  |                                     |            |       |    |                 |  |
| 768.119892 | 24950635.1  |                                     |            |       |    |                 |  |
| 768.152501 | 575466569.2 |                                     |            |       |    |                 |  |
| 768.181931 | 25714051.4  |                                     |            |       |    |                 |  |
| 768.197221 | 12122105.0  |                                     |            |       |    |                 |  |
| 768.213772 | 34202749.0  |                                     |            |       |    |                 |  |
| 768.228870 | 14851754.8  |                                     |            |       |    |                 |  |
| 768.242053 | 16719047.9  |                                     |            |       |    |                 |  |
| 768.263569 | 375054403.4 |                                     |            |       |    |                 |  |
| 768.325351 | 21962500.2  |                                     |            |       |    |                 |  |
| 768.344234 | 10093619.5  |                                     |            |       |    |                 |  |
| 768.374648 | 225181697.6 |                                     |            |       |    |                 |  |
| 768.404996 | 8933948.6   |                                     |            |       |    |                 |  |
| 768.436558 | 12055206.8  |                                     |            |       |    |                 |  |
| 768.455349 | 5435290.6   |                                     |            |       |    |                 |  |
| 768.485937 | 127447492.6 |                                     |            |       |    |                 |  |
| 768.514035 | 5404641.1   |                                     |            |       |    |                 |  |
| 768.527727 | 3639340.7   |                                     |            |       |    |                 |  |

|            |            |                                                                                                |            |       |    |                    |
|------------|------------|------------------------------------------------------------------------------------------------|------------|-------|----|--------------------|
| 768.549147 | 7324950.5  |                                                                                                |            |       |    |                    |
| 768.570284 | 3546163.0  |                                                                                                |            |       |    |                    |
| 768.625365 | 3858409.2  |                                                                                                |            |       |    |                    |
| 768.633849 | 2940872.2  |                                                                                                |            |       |    |                    |
| 768.658831 | 4602198.4  |                                                                                                |            |       |    |                    |
| 768.680634 | 2541468.5  |                                                                                                |            |       |    |                    |
| 768.708337 | 40545200.4 |                                                                                                |            |       |    |                    |
| 768.744452 | 2123320.3  |                                                                                                |            |       |    |                    |
| 768.756252 | 2637375.0  |                                                                                                |            |       |    |                    |
| 768.785846 | 5096026.8  |                                                                                                |            |       |    |                    |
| 768.819846 | 21464261.7 |                                                                                                |            |       |    |                    |
| 768.848213 | 2356250.8  |                                                                                                |            |       |    |                    |
| 768.861058 | 2239916.5  |                                                                                                |            |       |    |                    |
| 768.883468 | 2239120.3  |                                                                                                |            |       |    |                    |
| 768.907781 | 5448108.0  |                                                                                                |            |       |    |                    |
| 768.930841 | 10853449.9 |                                                                                                |            |       |    |                    |
| 768.956831 | 3124943.6  |                                                                                                |            |       |    |                    |
| 768.977440 | 1743895.0  |                                                                                                |            |       |    |                    |
| 769.001672 | 1750704.1  |                                                                                                |            |       |    |                    |
| 769.042430 | 8408158.8  |                                                                                                |            |       |    |                    |
| 769.058421 | 2078191.4  |                                                                                                |            |       |    |                    |
| 769.123518 | 1939109.5  |                                                                                                |            |       |    |                    |
| 769.151150 | 5413774.9  |                                                                                                |            |       |    |                    |
| 769.168391 | 4216262.8  |                                                                                                |            |       |    |                    |
| 769.192862 | 2310585.3  |                                                                                                |            |       |    |                    |
| 769.214269 | 2024984.7  |                                                                                                |            |       |    |                    |
| 769.239337 | 2228859.8  |                                                                                                |            |       |    |                    |
| 769.288731 | 3766648.3  |                                                                                                |            |       |    |                    |
| 769.348754 | 1818052.7  |                                                                                                |            |       |    |                    |
| 769.375186 | 10234975.2 |                                                                                                |            |       |    |                    |
| 769.405938 | 2164215.5  |                                                                                                |            |       |    |                    |
| 769.446332 | 1776330.1  |                                                                                                |            |       |    |                    |
| 769.485397 | 7742042.9  |                                                                                                |            |       |    |                    |
| 769.500301 | 1879278.4  |                                                                                                |            |       |    |                    |
| 769.526629 | 2179282.7  |                                                                                                |            |       |    |                    |
| 769.561908 | 1838636.5  |                                                                                                |            |       |    |                    |
| 769.596858 | 6795918.5  |                                                                                                |            |       |    |                    |
| 769.705747 | 14079550.7 |                                                                                                |            |       |    |                    |
| 769.770836 | 3143169.2  |                                                                                                |            |       |    |                    |
| 769.816281 | 32895378.3 | C <sub>95</sub> H <sub>118</sub> N <sub>35</sub> O <sub>48</sub> P <sub>9</sub> S <sub>9</sub> | 769.817560 | 1.661 | -4 | x9 - CH3           |
| 769.882409 | 3400520.3  |                                                                                                |            |       |    |                    |
| 769.892109 | 2195158.0  |                                                                                                |            |       |    |                    |
| 769.906108 | 2711467.7  |                                                                                                |            |       |    |                    |
| 769.927434 | 56965789.5 |                                                                                                |            |       |    |                    |
| 769.949600 | 3591183.2  |                                                                                                |            |       |    |                    |
| 769.987954 | 4555290.0  |                                                                                                |            |       |    |                    |
| 770.014085 | 2469194.1  |                                                                                                |            |       |    |                    |
| 770.038721 | 63744751.3 |                                                                                                |            |       |    |                    |
| 770.072269 | 3006868.8  | C <sub>121</sub> H <sub>154</sub> N <sub>38</sub> O <sub>64</sub> P <sub>11</sub> S            | 770.072837 | 0.738 | -5 | b12 - B(T) +<br>1H |
| 770.093603 | 6328890.7  |                                                                                                |            |       |    |                    |
| 770.118141 | 2582463.2  |                                                                                                |            |       |    |                    |
| 770.150107 | 69517503.3 |                                                                                                |            |       |    |                    |
| 770.180385 | 3474300.3  |                                                                                                |            |       |    |                    |
| 770.192682 | 2350741.3  |                                                                                                |            |       |    |                    |
| 770.206681 | 4324717.2  |                                                                                                |            |       |    |                    |
| 770.238158 | 5340077.5  |                                                                                                |            |       |    |                    |
| 770.261286 | 62787818.8 |                                                                                                |            |       |    |                    |
| 770.283049 | 3909304.0  |                                                                                                |            |       |    |                    |
| 770.335092 | 2306589.0  |                                                                                                |            |       |    |                    |

|            |            |                                                                                               |            |       |    |                                                                                            |
|------------|------------|-----------------------------------------------------------------------------------------------|------------|-------|----|--------------------------------------------------------------------------------------------|
| 770.348724 | 2811847.9  |                                                                                               |            |       |    |                                                                                            |
| 770.372227 | 55627949.5 |                                                                                               |            |       |    |                                                                                            |
| 770.392852 | 3976690.0  |                                                                                               |            |       |    |                                                                                            |
| 770.405508 | 2712759.1  |                                                                                               |            |       |    |                                                                                            |
| 770.451933 | 2257352.4  |                                                                                               |            |       |    |                                                                                            |
| 770.483733 | 36138896.2 |                                                                                               |            |       |    |                                                                                            |
| 770.524356 | 3155632.4  |                                                                                               |            |       |    |                                                                                            |
| 770.540315 | 2559077.7  |                                                                                               |            |       |    |                                                                                            |
| 770.560418 | 2234250.8  |                                                                                               |            |       |    |                                                                                            |
| 770.594812 | 23699270.0 |                                                                                               |            |       |    |                                                                                            |
| 770.633909 | 1784288.4  |                                                                                               |            |       |    |                                                                                            |
| 770.650968 | 2221250.5  |                                                                                               |            |       |    |                                                                                            |
| 770.684956 | 2108053.0  |                                                                                               |            |       |    |                                                                                            |
| 770.705494 | 14604235.7 |                                                                                               |            |       |    |                                                                                            |
| 770.726334 | 1980493.1  |                                                                                               |            |       |    |                                                                                            |
| 770.766188 | 1939049.0  |                                                                                               |            |       |    |                                                                                            |
| 770.798907 | 24187683.1 |                                                                                               |            |       |    |                                                                                            |
| 770.893512 | 2966109.0  |                                                                                               |            |       |    |                                                                                            |
| 770.921240 | 4562337.3  |                                                                                               |            |       |    |                                                                                            |
| 770.942588 | 46568039.5 |                                                                                               |            |       |    |                                                                                            |
| 770.962921 | 2799686.3  |                                                                                               |            |       |    |                                                                                            |
| 771.035352 | 5590677.4  |                                                                                               |            |       |    |                                                                                            |
| 771.049159 | 3666918.0  |                                                                                               |            |       |    |                                                                                            |
| 771.085193 | 59925657.0 |                                                                                               |            |       |    |                                                                                            |
| 771.106770 | 2398310.6  |                                                                                               |            |       |    |                                                                                            |
| 771.142471 | 2327309.7  |                                                                                               |            |       |    |                                                                                            |
| 771.177397 | 4700517.9  |                                                                                               |            |       |    |                                                                                            |
| 771.194566 | 2794168.9  |                                                                                               |            |       |    |                                                                                            |
| 771.227948 | 58908944.5 |                                                                                               |            |       |    |                                                                                            |
| 771.250695 | 2798139.7  |                                                                                               |            |       |    |                                                                                            |
| 771.269583 | 2161028.1  | C <sub>121</sub> H <sub>150</sub> N <sub>41</sub> O <sub>62</sub> P <sub>11</sub> S           | 771.270456 | 1.132 | -5 | z12 - B(dC) -<br>2H, y12 -<br>B(dC) - H <sub>2</sub> O,<br>y12 - B(T) -<br>NH <sub>3</sub> |
|            |            | 11                                                                                            |            |       |    |                                                                                            |
| 771.320716 | 2557635.0  |                                                                                               |            |       |    |                                                                                            |
| 771.371094 | 54764215.9 |                                                                                               |            |       |    |                                                                                            |
| 771.422563 | 1822834.7  |                                                                                               |            |       |    |                                                                                            |
| 771.514000 | 38396693.5 |                                                                                               |            |       |    |                                                                                            |
| 771.591661 | 12613808.5 |                                                                                               |            |       |    |                                                                                            |
| 771.622774 | 1831336.4  |                                                                                               |            |       |    |                                                                                            |
| 771.656592 | 26473407.7 |                                                                                               |            |       |    |                                                                                            |
| 771.701560 | 20897044.0 |                                                                                               |            |       |    |                                                                                            |
| 771.746666 | 3179007.9  |                                                                                               |            |       |    |                                                                                            |
| 771.756016 | 3483587.1  |                                                                                               |            |       |    |                                                                                            |
| 771.795643 | 12751182.4 |                                                                                               |            |       |    |                                                                                            |
| 771.814571 | 24295743.9 |                                                                                               |            |       |    |                                                                                            |
| 771.891348 | 2083498.0  |                                                                                               |            |       |    |                                                                                            |
| 771.923591 | 25783260.5 |                                                                                               |            |       |    |                                                                                            |
| 771.944881 | 6454570.9  |                                                                                               |            |       |    |                                                                                            |
| 771.982481 | 2936939.4  |                                                                                               |            |       |    |                                                                                            |
| 772.034775 | 25023418.8 |                                                                                               |            |       |    |                                                                                            |
| 772.084804 | 7680307.7  | C <sub>76</sub> H <sub>95</sub> N <sub>21</sub> O <sub>40</sub> P <sub>6</sub> S <sub>6</sub> | 772.085896 | 1.414 | -3 | b7 - 2H                                                                                    |
| 772.145567 | 18372652.0 |                                                                                               |            |       |    |                                                                                            |
| 772.229021 | 2115000.0  |                                                                                               |            |       |    |                                                                                            |
| 772.257316 | 10922988.3 |                                                                                               |            |       |    |                                                                                            |
| 772.368337 | 11085910.6 |                                                                                               |            |       |    |                                                                                            |
| 772.416546 | 1955829.0  |                                                                                               |            |       |    |                                                                                            |
| 772.479130 | 5815891.0  |                                                                                               |            |       |    |                                                                                            |
| 772.592757 | 2907802.0  |                                                                                               |            |       |    |                                                                                            |
| 772.705938 | 2033221.1  |                                                                                               |            |       |    |                                                                                            |

|            |             |                                                                                                |            |       |    |          |  |
|------------|-------------|------------------------------------------------------------------------------------------------|------------|-------|----|----------|--|
| 773.000791 | 1952490.0   |                                                                                                |            |       |    |          |  |
| 773.031008 | 9392357.1   |                                                                                                |            |       |    |          |  |
| 773.045547 | 5551434.7   |                                                                                                |            |       |    |          |  |
| 773.081488 | 127140707.3 | C <sub>172</sub> H <sub>217</sub> N <sub>56</sub> O <sub>88</sub> P <sub>15</sub> S            | 773.079889 | 2.068 | -7 | M - 7H   |  |
|            |             | 15                                                                                             |            |       |    |          |  |
| 773.104331 | 5961721.8   |                                                                                                |            |       |    |          |  |
| 773.135185 | 5553249.1   |                                                                                                |            |       |    |          |  |
| 773.144849 | 4685361.8   |                                                                                                |            |       |    |          |  |
| 773.158703 | 4756291.1   |                                                                                                |            |       |    |          |  |
| 773.174790 | 19313981.0  |                                                                                                |            |       |    |          |  |
| 773.190599 | 9888102.8   |                                                                                                |            |       |    |          |  |
| 773.224298 | 245561126.4 |                                                                                                |            |       |    |          |  |
| 773.255039 | 10401533.2  |                                                                                                |            |       |    |          |  |
| 773.267655 | 4471998.2   |                                                                                                |            |       |    |          |  |
| 773.290371 | 6069013.7   |                                                                                                |            |       |    |          |  |
| 773.316615 | 19448748.2  |                                                                                                |            |       |    |          |  |
| 773.336597 | 10023743.5  |                                                                                                |            |       |    |          |  |
| 773.367293 | 296464981.4 |                                                                                                |            |       |    |          |  |
| 773.399528 | 9724953.4   |                                                                                                |            |       |    |          |  |
| 773.419626 | 6574535.0   |                                                                                                |            |       |    |          |  |
| 773.459749 | 15575045.0  |                                                                                                |            |       |    |          |  |
| 773.475287 | 8333916.7   |                                                                                                |            |       |    |          |  |
| 773.510381 | 255206763.6 |                                                                                                |            |       |    |          |  |
| 773.563158 | 7404690.9   |                                                                                                |            |       |    |          |  |
| 773.574686 | 4550694.5   | C <sub>96</sub> H <sub>121</sub> N <sub>35</sub> O <sub>48</sub> P <sub>9</sub> S <sub>9</sub> | 773.573428 | -     | -4 | x9       |  |
|            |             |                                                                                                |            | 1.626 |    |          |  |
| 773.587258 | 4687840.0   |                                                                                                |            |       |    |          |  |
| 773.601978 | 12713446.9  |                                                                                                |            |       |    |          |  |
| 773.620623 | 7363045.5   |                                                                                                |            |       |    |          |  |
| 773.653336 | 173606790.6 |                                                                                                |            |       |    |          |  |
| 773.683711 | 6840504.6   |                                                                                                |            |       |    |          |  |
| 773.705953 | 4676020.8   |                                                                                                |            |       |    |          |  |
| 773.720107 | 3487264.2   |                                                                                                |            |       |    |          |  |
| 773.744849 | 10407017.5  |                                                                                                |            |       |    |          |  |
| 773.796714 | 99049298.4  |                                                                                                |            |       |    |          |  |
| 773.849733 | 3530281.7   |                                                                                                |            |       |    |          |  |
| 773.887351 | 7373780.9   |                                                                                                |            |       |    |          |  |
| 773.905343 | 3502723.6   |                                                                                                |            |       |    |          |  |
| 773.940377 | 57736249.1  |                                                                                                |            |       |    |          |  |
| 773.967572 | 2456300.0   |                                                                                                |            |       |    |          |  |
| 773.994553 | 1814567.1   |                                                                                                |            |       |    |          |  |
| 774.033026 | 4645389.8   |                                                                                                |            |       |    |          |  |
| 774.082282 | 23038479.1  |                                                                                                |            |       |    |          |  |
| 774.225045 | 10214788.3  |                                                                                                |            |       |    |          |  |
| 774.367563 | 5544808.1   |                                                                                                |            |       |    |          |  |
| 811.076521 | 3087090.5   |                                                                                                |            |       |    |          |  |
| 817.541991 | 1829962.6   |                                                                                                |            |       |    |          |  |
| 838.161227 | 3411936.0   |                                                                                                |            |       |    |          |  |
| 838.289210 | 8026811.8   |                                                                                                |            |       |    |          |  |
| 838.663364 | 2149612.8   |                                                                                                |            |       |    |          |  |
| 863.547208 | 2107692.7   |                                                                                                |            |       |    |          |  |
| 864.293701 | 3903138.8   | C <sub>136</sub> H <sub>174</sub> N <sub>46</sub> O <sub>70</sub> P <sub>12</sub> S            | 864.292120 | -     | -5 | y13 + 2H |  |
|            |             | 12                                                                                             |            | 1.829 |    |          |  |
| 902.750562 | 2065263.0   |                                                                                                |            |       |    |          |  |
| 908.535000 | 2468512.2   |                                                                                                |            |       |    |          |  |
| 908.699141 | 5235373.3   |                                                                                                |            |       |    |          |  |
| 908.871934 | 5017438.0   |                                                                                                |            |       |    |          |  |
| 909.041090 | 2628007.0   |                                                                                                |            |       |    |          |  |
| 958.041309 | 2042295.6   |                                                                                                |            |       |    |          |  |
| 958.186695 | 2220046.3   |                                                                                                |            |       |    |          |  |

|            |            |                                                                                     |            |       |    |             |  |
|------------|------------|-------------------------------------------------------------------------------------|------------|-------|----|-------------|--|
| 967.333684 | 1864564.3  |                                                                                     |            |       |    |             |  |
| 967.470591 | 4661105.1  |                                                                                     |            |       |    |             |  |
| 967.613112 | 5874718.9  |                                                                                     |            |       |    |             |  |
| 967.758174 | 5589847.4  |                                                                                     |            |       |    |             |  |
| 984.192873 | 5086973.0  |                                                                                     |            |       |    |             |  |
| 984.336008 | 7175087.2  |                                                                                     |            |       |    |             |  |
| 984.479466 | 4749622.4  |                                                                                     |            |       |    |             |  |
| 986.481750 | 3661598.7  |                                                                                     |            |       |    |             |  |
| 986.622582 | 11994536.6 |                                                                                     |            |       |    |             |  |
| 986.766019 | 12423686.2 |                                                                                     |            |       |    |             |  |
| 986.896634 | 5962200.5  |                                                                                     |            |       |    |             |  |
| 986.915472 | 4606523.7  |                                                                                     |            |       |    |             |  |
| 986.962939 | 3561800.9  |                                                                                     |            |       |    |             |  |
| 986.991586 | 2741168.2  |                                                                                     |            |       |    |             |  |
| 1024.34627 | 378492.0   | C <sub>126</sub> H <sub>161</sub> N <sub>44</sub> O <sub>66</sub> P <sub>12</sub> S | 1024.34508 | 1.156 | -4 | w12         |  |
| 0          |            | 12                                                                                  | 6          |       |    |             |  |
| 1082.31115 | 2150783.8  | C <sub>172</sub> H <sub>215</sub> N <sub>56</sub> O <sub>88</sub> P <sub>15</sub> S | 1082.31162 | 0.439 | -5 | M - 7H      |  |
| 1          |            | 15                                                                                  | 6          |       |    |             |  |
| 1082.51296 | 5040763.8  | C <sub>172</sub> H <sub>216</sub> N <sub>56</sub> O <sub>88</sub> P <sub>15</sub> S | 1082.51319 | 0.210 | -5 | M - 5H - 4H |  |
| 4          |            | 15                                                                                  | 1          |       |    |             |  |
| 1082.91343 | 2786627.3  |                                                                                     |            |       |    |             |  |
| 8          |            |                                                                                     |            |       |    |             |  |
|            |            |                                                                                     | Abs mean   | 1.287 |    |             |  |
|            |            |                                                                                     | error      |       |    |             |  |
|            |            |                                                                                     | Abs mean   | 0.371 |    |             |  |
|            |            |                                                                                     | std dev    |       |    |             |  |

---

**Table S15 showing peak list, intensity, elemental composition, and possible assignments with mass errors (ppm) of danvatirsen using 2D-UVPD-MS of one scan and no denoising of [M-8H]<sup>8-</sup> precursor ion (note, noise peaks were included to highlight the effect of denoising).**

| Measured <i>mz</i> | Intensity  | Elemental Composition                                                                         | Theoretical <i>mz</i> | Error (ppm) | Charge | Assignment     |
|--------------------|------------|-----------------------------------------------------------------------------------------------|-----------------------|-------------|--------|----------------|
| 225.564620         | 4432978.2  |                                                                                               |                       |             |        |                |
| 338.157835         | 11445873.4 |                                                                                               |                       |             |        |                |
| 338.211348         | 3663335.9  |                                                                                               |                       |             |        |                |
| 338.220331         | 25879588.2 |                                                                                               |                       |             |        |                |
| 338.229994         | 3355645.6  |                                                                                               |                       |             |        |                |
| 338.274159         | 3407926.9  |                                                                                               |                       |             |        |                |
| 338.283009         | 30083773.9 |                                                                                               |                       |             |        |                |
| 338.292559         | 4503527.9  |                                                                                               |                       |             |        |                |
| 338.345512         | 14004153.0 |                                                                                               |                       |             |        |                |
| 338.399633         | 3570902.7  |                                                                                               |                       |             |        |                |
| 338.408158         | 16306357.6 |                                                                                               |                       |             |        |                |
| 338.462176         | 3122436.1  |                                                                                               |                       |             |        |                |
| 338.470632         | 22844711.0 |                                                                                               |                       |             |        |                |
| 338.479713         | 2978684.4  |                                                                                               |                       |             |        |                |
| 338.533138         | 18663184.5 |                                                                                               |                       |             |        |                |
| 338.595374         | 7109467.6  |                                                                                               |                       |             |        |                |
| 338.658348         | 4542706.1  |                                                                                               |                       |             |        |                |
| 338.720810         | 3274095.5  |                                                                                               |                       |             |        |                |
| 383.685875         | 3005234.7  |                                                                                               |                       |             |        |                |
| 383.741421         | 3047159.4  |                                                                                               |                       |             |        |                |
| 383.796819         | 4790834.8  |                                                                                               |                       |             |        |                |
| 383.852803         | 5536303.5  |                                                                                               |                       |             |        |                |
| 383.908368         | 5491036.3  |                                                                                               |                       |             |        |                |
| 384.019223         | 3684546.1  | C <sub>61</sub> H <sub>75</sub> N <sub>14</sub> O <sub>34</sub> P <sub>6</sub> S <sub>6</sub> | 384.019125            | -0.255      | -5     | c6 - B(T) - 4H |
| 386.611177         | 4820919.8  |                                                                                               |                       |             |        |                |
| 386.682538         | 5937741.5  |                                                                                               |                       |             |        |                |
| 386.753958         | 6352443.1  |                                                                                               |                       |             |        |                |
| 386.825573         | 8437067.5  |                                                                                               |                       |             |        |                |
| 386.897146         | 5341620.1  |                                                                                               |                       |             |        |                |
| 386.968404         | 3150199.8  |                                                                                               |                       |             |        |                |
| 431.773017         | 4730673.5  |                                                                                               |                       |             |        |                |
| 431.898246         | 5619314.3  |                                                                                               |                       |             |        |                |
| 432.023441         | 4464920.4  |                                                                                               |                       |             |        |                |
| 451.215020         | 3808466.6  |                                                                                               |                       |             |        |                |
| 451.298462         | 3288824.8  |                                                                                               |                       |             |        |                |
| 451.381653         | 4227436.6  |                                                                                               |                       |             |        |                |
| 493.670986         | 3145803.4  |                                                                                               |                       |             |        |                |
| 541.054566         | 5112410.2  |                                                                                               |                       |             |        |                |
| 541.254315         | 8222990.8  |                                                                                               |                       |             |        |                |
| 541.454155         | 3680355.6  |                                                                                               |                       |             |        |                |
| 599.619888         | 4344628.6  |                                                                                               |                       |             |        |                |
| 601.061588         | 8656425.0  |                                                                                               |                       |             |        |                |
| 601.174444         | 5866803.3  |                                                                                               |                       |             |        |                |
| 601.284159         | 16500222.7 |                                                                                               |                       |             |        |                |
| 601.395476         | 34268726.7 |                                                                                               |                       |             |        |                |
| 601.507165         | 8021247.4  |                                                                                               |                       |             |        |                |
| 601.618941         | 6016479.6  |                                                                                               |                       |             |        |                |
| 601.729300         | 9369557.5  |                                                                                               |                       |             |        |                |
| 601.839552         | 7788598.0  |                                                                                               |                       |             |        |                |
| 601.951839         | 5511524.5  |                                                                                               |                       |             |        |                |
| 609.308719         | 3498098.6  | C <sub>76</sub> H <sub>98</sub> N <sub>25</sub> O <sub>40</sub> P <sub>7</sub> S <sub>7</sub> | 609.308004            | -           | -4     | w7             |

|            |             |                                                                                               |            |       |    |                                |
|------------|-------------|-----------------------------------------------------------------------------------------------|------------|-------|----|--------------------------------|
|            |             |                                                                                               |            | 1.173 |    |                                |
| 627.759577 | 4309770.9   |                                                                                               |            |       |    |                                |
| 627.850219 | 9953375.3   |                                                                                               |            |       |    |                                |
| 627.940275 | 4212455.1   |                                                                                               |            |       |    |                                |
| 628.032667 | 4878836.6   |                                                                                               |            |       |    |                                |
| 628.122957 | 7767706.6   |                                                                                               |            |       |    |                                |
| 628.213923 | 8919933.7   |                                                                                               |            |       |    |                                |
| 657.594697 | 4015166.8   |                                                                                               |            |       |    |                                |
| 658.097654 | 3147957.1   | C <sub>46</sub> H <sub>57</sub> N <sub>12</sub> O <sub>22</sub> P <sub>3</sub> S <sub>3</sub> | 658.096992 | -     | -2 | a4 - 2H, b4 - H <sub>2</sub> O |
|            |             |                                                                                               |            | 1.006 |    |                                |
| 659.438524 | 3071434.2   |                                                                                               |            |       |    |                                |
| 659.565209 | 4559483.4   |                                                                                               |            |       |    |                                |
| 659.689487 | 10067982.4  |                                                                                               |            |       |    |                                |
| 659.815102 | 10005065.3  |                                                                                               |            |       |    |                                |
| 659.938912 | 5867082.1   |                                                                                               |            |       |    |                                |
| 660.065225 | 3170077.0   |                                                                                               |            |       |    |                                |
| 674.323209 | 8000287.7   |                                                                                               |            |       |    |                                |
| 674.448375 | 15905799.5  |                                                                                               |            |       |    |                                |
| 674.573862 | 22584435.9  |                                                                                               |            |       |    |                                |
| 674.698952 | 29111250.8  |                                                                                               |            |       |    |                                |
| 674.824210 | 27052144.4  |                                                                                               |            |       |    |                                |
| 674.948450 | 22368125.9  |                                                                                               |            |       |    |                                |
| 675.073082 | 13090907.2  |                                                                                               |            |       |    |                                |
| 675.198264 | 12758975.4  |                                                                                               |            |       |    |                                |
| 675.323832 | 6824854.3   |                                                                                               |            |       |    |                                |
| 675.447059 | 6258253.2   |                                                                                               |            |       |    |                                |
| 675.573081 | 3518445.4   |                                                                                               |            |       |    |                                |
| 676.203057 | 3619655.6   |                                                                                               |            |       |    |                                |
| 676.235137 | 3746144.8   |                                                                                               |            |       |    |                                |
| 676.252071 | 4930792.5   |                                                                                               |            |       |    |                                |
| 676.260528 | 4361064.3   |                                                                                               |            |       |    |                                |
| 676.283233 | 15564328.4  |                                                                                               |            |       |    |                                |
| 676.295047 | 13978909.4  |                                                                                               |            |       |    |                                |
| 676.320091 | 449150480.4 | C <sub>172</sub> H <sub>217</sub> N <sub>56</sub> O <sub>88</sub> P <sub>15</sub> S           | 676.318994 | 1.622 | -8 | M - 8H                         |
|            |             | 15                                                                                            |            |       |    |                                |
| 676.344306 | 17375037.8  |                                                                                               |            |       |    |                                |
| 676.361047 | 13575618.6  |                                                                                               |            |       |    |                                |
| 676.377876 | 11799169.8  |                                                                                               |            |       |    |                                |
| 676.384426 | 12660860.3  |                                                                                               |            |       |    |                                |
| 676.408122 | 51817222.3  |                                                                                               |            |       |    |                                |
| 676.419286 | 38577327.3  |                                                                                               |            |       |    |                                |
| 676.445508 | 1125225782. |                                                                                               |            |       |    |                                |
|            | 0           |                                                                                               |            |       |    |                                |
| 676.468474 | 42438058.5  |                                                                                               |            |       |    |                                |
| 676.479285 | 25792906.1  |                                                                                               |            |       |    |                                |
| 676.486520 | 31552394.5  |                                                                                               |            |       |    |                                |
| 676.496293 | 20415786.4  |                                                                                               |            |       |    |                                |
| 676.505410 | 23584962.5  |                                                                                               |            |       |    |                                |
| 676.514228 | 23659985.2  |                                                                                               |            |       |    |                                |
| 676.532749 | 96512871.7  |                                                                                               |            |       |    |                                |
| 676.543426 | 57886550.8  |                                                                                               |            |       |    |                                |
| 676.570707 | 1854525468. |                                                                                               |            |       |    |                                |
|            | 0           |                                                                                               |            |       |    |                                |
| 676.591763 | 67891764.3  |                                                                                               |            |       |    |                                |
| 676.602591 | 34444926.7  |                                                                                               |            |       |    |                                |
| 676.611250 | 50285717.1  |                                                                                               |            |       |    |                                |
| 676.619765 | 31839898.8  |                                                                                               |            |       |    |                                |
| 676.629611 | 34173202.1  |                                                                                               |            |       |    |                                |
| 676.638140 | 33858821.0  |                                                                                               |            |       |    |                                |
| 676.657565 | 123383411.1 |                                                                                               |            |       |    |                                |



|            |             |
|------------|-------------|
| 676.678658 | 72503957.9  |
| 676.695817 | 2194204109. |
|            | 0           |
| 676.712473 | 92581427.3  |
| 676.735930 | 53893085.2  |
| 676.743475 | 35533788.2  |
| 676.753936 | 35644811.2  |
| 676.762426 | 33900224.8  |
| 676.782225 | 123855911.6 |
| 676.798739 | 55555879.8  |
| 676.820855 | 1881691596. |
|            | 0           |
| 676.860665 | 43596738.0  |
| 676.878265 | 26271431.8  |
| 676.886799 | 25808664.7  |
| 676.907262 | 96441757.6  |
| 676.922539 | 44874404.5  |
| 676.945864 | 1367774834. |
|            | 0           |
| 676.969571 | 41636412.8  |
| 676.985673 | 30560242.8  |
| 677.003062 | 16845822.4  |
| 677.010939 | 18294069.7  |
| 677.022231 | 17719845.6  |
| 677.032647 | 72450755.7  |
| 677.046796 | 33768785.6  |
| 677.070872 | 979973286.7 |
| 677.094309 | 32020874.3  |
| 677.111897 | 21296088.3  |
| 677.136865 | 12897723.1  |
| 677.144009 | 9559570.0   |
| 677.157598 | 48633516.6  |
| 677.171331 | 21147556.3  |
| 677.195905 | 609568604.6 |
| 677.219668 | 21197933.7  |
| 677.236566 | 17549782.8  |
| 677.256868 | 6681177.4   |
| 677.282545 | 29079974.9  |
| 677.296051 | 11749361.1  |
| 677.320893 | 368877443.3 |
| 677.356302 | 6548642.7   |
| 677.362266 | 8076596.7   |
| 677.370223 | 4052381.7   |
| 677.381813 | 4043024.1   |
| 677.389304 | 4311724.4   |
| 677.407740 | 17570670.6  |
| 677.423289 | 9723876.0   |
| 677.446116 | 224005489.8 |
| 677.468612 | 7681294.4   |
| 677.487274 | 5827285.7   |
| 677.506046 | 3246821.6   |
| 677.524244 | 4992724.3   |
| 677.535502 | 3766772.5   |
| 677.545883 | 4228614.9   |
| 677.571105 | 123068616.8 |
| 677.611658 | 3213044.1   |
| 677.625464 | 3709773.3   |
| 677.634607 | 3568458.2   |
| 677.653864 | 3176321.5   |
| 677.696212 | 63732994.3  |

|            |            |                                                                                               |            |       |       |
|------------|------------|-----------------------------------------------------------------------------------------------|------------|-------|-------|
| 677.723426 | 3545545.5  |                                                                                               |            |       |       |
| 677.735208 | 3868673.0  |                                                                                               |            |       |       |
| 677.820878 | 30403183.3 |                                                                                               |            |       |       |
| 677.946207 | 16751425.8 |                                                                                               |            |       |       |
| 678.071266 | 7971883.2  |                                                                                               |            |       |       |
| 678.196739 | 5036525.6  |                                                                                               |            |       |       |
| 678.445709 | 4016997.9  |                                                                                               |            |       |       |
| 678.569970 | 5463928.6  |                                                                                               |            |       |       |
| 678.693885 | 5241741.7  |                                                                                               |            |       |       |
| 678.819348 | 5408154.5  |                                                                                               |            |       |       |
| 678.944997 | 3872184.4  |                                                                                               |            |       |       |
| 679.068047 | 24832625.0 |                                                                                               |            |       |       |
| 679.114395 | 4429997.1  | C <sub>46</sub> H <sub>59</sub> N <sub>16</sub> O <sub>21</sub> P <sub>3</sub> S <sub>3</sub> | 679.113507 | -     | -2 y4 |
|            |            |                                                                                               |            | 1.308 |       |
| 679.153132 | 3502811.8  |                                                                                               |            |       |       |
| 679.193252 | 52406402.9 |                                                                                               |            |       |       |
| 679.279432 | 4768727.1  |                                                                                               |            |       |       |
| 679.318261 | 75526728.3 |                                                                                               |            |       |       |
| 679.404702 | 5168359.4  |                                                                                               |            |       |       |
| 679.443330 | 79771192.2 |                                                                                               |            |       |       |
| 679.530104 | 4421684.3  |                                                                                               |            |       |       |
| 679.568303 | 66169948.9 |                                                                                               |            |       |       |
| 679.655051 | 3253925.7  |                                                                                               |            |       |       |
| 679.693372 | 43781992.0 |                                                                                               |            |       |       |
| 679.818021 | 32391928.0 |                                                                                               |            |       |       |
| 679.943034 | 20613256.0 |                                                                                               |            |       |       |
| 680.068052 | 8183523.7  |                                                                                               |            |       |       |
| 680.193433 | 4785558.0  |                                                                                               |            |       |       |
| 680.318176 | 3892605.5  |                                                                                               |            |       |       |
| 681.063513 | 11632771.4 |                                                                                               |            |       |       |
| 681.188856 | 18496986.8 |                                                                                               |            |       |       |
| 681.314435 | 18693358.4 |                                                                                               |            |       |       |
| 681.439185 | 21443351.0 |                                                                                               |            |       |       |
| 681.564119 | 9565200.0  |                                                                                               |            |       |       |
| 681.689650 | 10176818.7 |                                                                                               |            |       |       |
| 681.813423 | 5387611.2  |                                                                                               |            |       |       |
| 681.939208 | 3786467.5  |                                                                                               |            |       |       |
| 682.062928 | 4821061.4  |                                                                                               |            |       |       |
| 682.189181 | 3129427.3  |                                                                                               |            |       |       |
| 689.038488 | 3808385.1  |                                                                                               |            |       |       |
| 689.237404 | 2960416.9  |                                                                                               |            |       |       |
| 690.536404 | 3796913.0  |                                                                                               |            |       |       |
| 690.637266 | 7171002.3  |                                                                                               |            |       |       |
| 690.737707 | 10067253.2 |                                                                                               |            |       |       |
| 690.835657 | 7314165.4  |                                                                                               |            |       |       |
| 690.937544 | 21346003.6 |                                                                                               |            |       |       |
| 691.038111 | 14722509.6 |                                                                                               |            |       |       |
| 691.134381 | 4841259.0  |                                                                                               |            |       |       |
| 691.236439 | 11396104.8 |                                                                                               |            |       |       |
| 691.436154 | 4001922.2  |                                                                                               |            |       |       |
| 727.674371 | 2958368.1  |                                                                                               |            |       |       |
| 743.583147 | 3318186.7  |                                                                                               |            |       |       |
| 747.738727 | 3279538.1  |                                                                                               |            |       |       |
| 751.935257 | 2959282.8  |                                                                                               |            |       |       |
| 752.480514 | 3337064.5  |                                                                                               |            |       |       |
| 752.703341 | 3912309.1  |                                                                                               |            |       |       |
| 753.933122 | 4763156.9  |                                                                                               |            |       |       |
| 754.074165 | 4391564.8  |                                                                                               |            |       |       |
| 754.218145 | 6446065.6  |                                                                                               |            |       |       |
| 754.360903 | 4905642.0  |                                                                                               |            |       |       |

|            |            |                                                                                                |            |       |    |            |
|------------|------------|------------------------------------------------------------------------------------------------|------------|-------|----|------------|
| 754.503212 | 3918422.1  |                                                                                                |            |       |    |            |
| 754.642698 | 3241700.4  |                                                                                                |            |       |    |            |
| 755.949066 | 3085865.7  |                                                                                                |            |       |    |            |
| 765.713901 | 3015591.0  |                                                                                                |            |       |    |            |
| 765.821212 | 4636514.9  |                                                                                                |            |       |    |            |
| 765.931197 | 5354531.1  |                                                                                                |            |       |    |            |
| 766.756875 | 3774977.1  |                                                                                                |            |       |    |            |
| 767.091342 | 4751358.5  |                                                                                                |            |       |    |            |
| 767.327565 | 4075465.6  |                                                                                                |            |       |    |            |
| 767.372695 | 6662063.8  |                                                                                                |            |       |    |            |
| 767.438712 | 5727800.7  |                                                                                                |            |       |    |            |
| 767.485757 | 49111102.8 |                                                                                                |            |       |    |            |
| 767.507485 | 3439208.1  |                                                                                                |            |       |    |            |
| 767.548203 | 6149434.1  |                                                                                                |            |       |    |            |
| 767.596468 | 39688613.5 |                                                                                                |            |       |    |            |
| 767.660429 | 7650297.3  |                                                                                                |            |       |    |            |
| 767.708862 | 40650420.7 |                                                                                                |            |       |    |            |
| 767.772509 | 4609873.6  |                                                                                                |            |       |    |            |
| 767.820346 | 15820792.6 | C <sub>96</sub> H <sub>122</sub> N <sub>31</sub> O <sub>50</sub> P <sub>9</sub> S <sub>9</sub> | 767.819768 | -     | -4 | c9 + 1H    |
|            |            |                                                                                                |            | 0.753 |    |            |
| 767.883219 | 7571085.8  |                                                                                                |            |       |    |            |
| 767.930113 | 52225490.5 |                                                                                                |            |       |    |            |
| 767.994344 | 4621573.5  |                                                                                                |            |       |    |            |
| 768.041399 | 28432899.3 |                                                                                                |            |       |    |            |
| 768.152488 | 11003381.3 |                                                                                                |            |       |    |            |
| 768.263684 | 24557870.4 |                                                                                                |            |       |    |            |
| 768.376086 | 7405030.5  |                                                                                                |            |       |    |            |
| 768.487577 | 4633303.9  |                                                                                                |            |       |    |            |
| 768.597278 | 3803506.4  | C <sub>51</sub> H <sub>65</sub> N <sub>15</sub> O <sub>25</sub> P <sub>4</sub> S <sub>4</sub>  | 768.598191 | 1.188 | -2 | z5 - B(dC) |
| 770.037994 | 4613908.7  |                                                                                                |            |       |    |            |
| 771.086252 | 6162871.1  |                                                                                                |            |       |    |            |
| 771.229439 | 3639209.2  |                                                                                                |            |       |    |            |
| 771.371454 | 4141501.4  |                                                                                                |            |       |    |            |
| 771.480254 | 3051724.1  |                                                                                                |            |       |    |            |
| 771.512642 | 3112167.3  |                                                                                                |            |       |    |            |
| 771.810447 | 3834877.5  |                                                                                                |            |       |    |            |
| 772.079459 | 3128801.6  |                                                                                                |            |       |    |            |
| 772.146820 | 3648785.7  |                                                                                                |            |       |    |            |
| 772.258881 | 3185871.0  |                                                                                                |            |       |    |            |
| 772.369548 | 4125983.9  |                                                                                                |            |       |    |            |
| 772.937599 | 3873390.9  |                                                                                                |            |       |    |            |
| 773.035226 | 3706450.5  |                                                                                                |            |       |    |            |
| 773.081950 | 13595266.5 |                                                                                                |            |       |    |            |
| 773.177474 | 5216293.9  |                                                                                                |            |       |    |            |
| 773.224417 | 40518666.5 |                                                                                                |            |       |    |            |
| 773.321132 | 7585378.5  | C <sub>96</sub> H <sub>120</sub> N <sub>35</sub> O <sub>48</sub> P <sub>9</sub> S <sub>9</sub> | 773.321472 | 0.440 | -4 | w9 - H2O   |
| 773.367808 | 60433856.8 |                                                                                                |            |       |    |            |
| 773.463261 | 10037742.9 |                                                                                                |            |       |    |            |
| 773.511871 | 59768503.3 |                                                                                                |            |       |    |            |
| 773.533829 | 4299998.9  |                                                                                                |            |       |    |            |
| 773.606560 | 10726315.5 |                                                                                                |            |       |    |            |
| 773.654091 | 83322937.5 |                                                                                                |            |       |    |            |
| 773.699648 | 3166241.0  |                                                                                                |            |       |    |            |
| 773.749997 | 7011783.9  |                                                                                                |            |       |    |            |
| 773.796710 | 13536684.3 |                                                                                                |            |       |    |            |
| 773.891166 | 5934787.2  |                                                                                                |            |       |    |            |
| 773.939372 | 39965491.1 |                                                                                                |            |       |    |            |
| 774.083324 | 19880479.9 |                                                                                                |            |       |    |            |
| 774.227015 | 11857823.3 |                                                                                                |            |       |    |            |
| 774.366218 | 5327461.7  |                                                                                                |            |       |    |            |

|            |            |                                                                                               |            |       |    |                   |
|------------|------------|-----------------------------------------------------------------------------------------------|------------|-------|----|-------------------|
| 774.511674 | 5821579.8  |                                                                                               |            |       |    |                   |
| 774.796242 | 3259120.1  |                                                                                               |            |       |    |                   |
| 776.507992 | 4873977.6  |                                                                                               |            |       |    |                   |
| 776.651848 | 7272871.6  |                                                                                               |            |       |    |                   |
| 776.794065 | 10244021.7 |                                                                                               |            |       |    |                   |
| 776.939979 | 3965695.4  |                                                                                               |            |       |    |                   |
| 777.220008 | 3267660.9  |                                                                                               |            |       |    |                   |
| 778.645883 | 3848342.9  |                                                                                               |            |       |    |                   |
| 778.788603 | 7766015.7  |                                                                                               |            |       |    |                   |
| 778.931841 | 6200034.2  |                                                                                               |            |       |    |                   |
| 779.073554 | 6717275.9  |                                                                                               |            |       |    |                   |
| 779.220980 | 3276865.4  |                                                                                               |            |       |    |                   |
| 779.358924 | 3467473.4  |                                                                                               |            |       |    |                   |
| 779.503896 | 6413121.0  |                                                                                               |            |       |    |                   |
| 779.649536 | 3877925.5  |                                                                                               |            |       |    |                   |
| 791.480491 | 4957579.2  |                                                                                               |            |       |    |                   |
| 791.680195 | 5084228.8  |                                                                                               |            |       |    |                   |
| 791.880441 | 7388811.7  | C <sub>126</sub> H <sub>159</sub> N <sub>40</sub> O <sub>65</sub> P <sub>11</sub> S           | 791.880875 | 0.548 | -5 | a12               |
|            |            | 11                                                                                            |            |       |    |                   |
| 792.080059 | 4727376.4  |                                                                                               |            |       |    |                   |
| 809.245586 | 3188481.8  |                                                                                               |            |       |    |                   |
| 809.581634 | 3653078.4  |                                                                                               |            |       |    |                   |
| 817.020900 | 4317702.0  |                                                                                               |            |       |    |                   |
| 818.111884 | 3223753.8  |                                                                                               |            |       |    |                   |
| 819.075977 | 3781586.2  |                                                                                               |            |       |    |                   |
| 819.476516 | 8527175.5  | C <sub>126</sub> H <sub>162</sub> N <sub>44</sub> O <sub>66</sub> P <sub>12</sub> S           | 819.476178 | -     | -5 | w12 + 2H          |
|            |            | 12                                                                                            |            | 0.412 |    |                   |
| 819.677058 | 5419794.0  |                                                                                               |            |       |    |                   |
| 824.089062 | 3233847.2  |                                                                                               |            |       |    |                   |
| 838.411777 | 3431233.0  |                                                                                               |            |       |    |                   |
| 838.537347 | 4435107.5  |                                                                                               |            |       |    |                   |
| 846.663462 | 3741691.8  | C <sub>130</sub> H <sub>165</sub> N <sub>41</sub> O <sub>70</sub> P <sub>13</sub> S           | 846.664127 | 0.785 | -5 | x13 - B(A) - OCH2 |
|            |            | 13                                                                                            |            |       |    |                   |
| 846.791853 | 3629964.7  |                                                                                               |            |       |    |                   |
| 846.916257 | 5467475.8  |                                                                                               |            |       |    |                   |
| 847.040939 | 3450616.5  |                                                                                               |            |       |    |                   |
| 847.164643 | 3345989.1  |                                                                                               |            |       |    |                   |
| 847.289799 | 4148191.0  |                                                                                               |            |       |    |                   |
| 847.413415 | 3975436.1  | C <sub>81</sub> H <sub>98</sub> N <sub>27</sub> O <sub>41</sub> P <sub>7</sub> S <sub>7</sub> | 847.413451 | 0.042 | -3 | y8 - B(dC) - 4H   |
| 860.489615 | 9124759.4  |                                                                                               |            |       |    |                   |
| 860.689859 | 14405027.4 | C <sub>136</sub> H <sub>172</sub> N <sub>46</sub> O <sub>69</sub> P <sub>12</sub> S           | 860.690007 | 0.172 | -5 | z13               |
|            |            | 12                                                                                            |            |       |    |                   |
| 861.295973 | 3020640.5  |                                                                                               |            |       |    |                   |
| 861.548676 | 3338284.6  |                                                                                               |            |       |    |                   |
| 861.798825 | 3434080.8  |                                                                                               |            |       |    |                   |
| 861.924666 | 3844193.1  |                                                                                               |            |       |    |                   |
| 862.049519 | 4802487.8  |                                                                                               |            |       |    |                   |
| 863.296088 | 12759855.3 |                                                                                               |            |       |    |                   |
| 863.363628 | 3661256.2  |                                                                                               |            |       |    |                   |
| 863.420977 | 27455807.5 |                                                                                               |            |       |    |                   |
| 863.489387 | 6715713.5  |                                                                                               |            |       |    |                   |
| 863.546631 | 70618663.7 |                                                                                               |            |       |    |                   |
| 863.613198 | 7146466.5  |                                                                                               |            |       |    |                   |
| 863.670950 | 56701990.6 |                                                                                               |            |       |    |                   |
| 863.698056 | 3253742.5  |                                                                                               |            |       |    |                   |
| 863.737574 | 10682828.9 |                                                                                               |            |       |    |                   |
| 863.795006 | 31811137.4 |                                                                                               |            |       |    |                   |
| 863.865869 | 5350471.7  |                                                                                               |            |       |    |                   |
| 863.923245 | 29593047.1 |                                                                                               |            |       |    |                   |
| 863.988833 | 4372746.3  |                                                                                               |            |       |    |                   |

|            |            |                                                                                                |            |        |    |                   |
|------------|------------|------------------------------------------------------------------------------------------------|------------|--------|----|-------------------|
| 864.047536 | 30018786.0 |                                                                                                |            |        |    |                   |
| 864.110425 | 3784236.5  |                                                                                                |            |        |    |                   |
| 864.173549 | 43117996.7 |                                                                                                |            |        |    |                   |
| 864.235732 | 3123675.6  |                                                                                                |            |        |    |                   |
| 864.298399 | 27580100.5 |                                                                                                |            |        |    |                   |
| 864.421056 | 6699241.2  |                                                                                                |            |        |    |                   |
| 864.547593 | 5507905.3  |                                                                                                |            |        |    |                   |
| 866.295316 | 4193850.2  |                                                                                                |            |        |    |                   |
| 866.417793 | 3178036.7  |                                                                                                |            |        |    |                   |
| 866.545327 | 5155109.7  |                                                                                                |            |        |    |                   |
| 866.669188 | 3226038.5  |                                                                                                |            |        |    |                   |
| 866.795660 | 3161346.2  |                                                                                                |            |        |    |                   |
| 867.044390 | 3155638.7  |                                                                                                |            |        |    |                   |
| 868.287636 | 3286253.3  |                                                                                                |            |        |    |                   |
| 868.412479 | 3498312.4  |                                                                                                |            |        |    |                   |
| 868.541329 | 5402233.4  |                                                                                                |            |        |    |                   |
| 868.666835 | 4027127.6  |                                                                                                |            |        |    |                   |
| 868.792992 | 4058035.3  |                                                                                                |            |        |    |                   |
| 868.918110 | 4225133.6  |                                                                                                |            |        |    |                   |
| 876.918359 | 3996472.5  |                                                                                                |            |        |    |                   |
| 877.086806 | 5093324.0  |                                                                                                |            |        |    |                   |
| 877.253681 | 3496399.8  |                                                                                                |            |        |    |                   |
| 881.424382 | 2979311.2  |                                                                                                |            |        |    |                   |
| 881.763584 | 3258398.1  | C <sub>86</sub> H <sub>107</sub> N <sub>26</sub> O <sub>44</sub> P <sub>7</sub> S <sub>7</sub> | 881.764150 | 0.642  | -3 | b8 - H2O, a8 - 2H |
| 884.778014 | 3323110.3  |                                                                                                |            |        |    |                   |
| 887.099082 | 3286911.0  |                                                                                                |            |        |    |                   |
| 887.601312 | 3051364.7  | C <sub>56</sub> H <sub>74</sub> N <sub>18</sub> O <sub>29</sub> P <sub>5</sub> S <sub>5</sub>  | 887.600761 | -0.621 | -2 | w5 + 1H           |
| 899.933646 | 3546896.0  |                                                                                                |            |        |    |                   |
| 900.102401 | 3203339.7  |                                                                                                |            |        |    |                   |
| 900.266378 | 3775906.6  |                                                                                                |            |        |    |                   |
| 901.760290 | 17253985.4 |                                                                                                |            |        |    |                   |
| 901.860425 | 3075151.3  |                                                                                                |            |        |    |                   |
| 901.927539 | 39659553.8 |                                                                                                |            |        |    |                   |
| 902.032055 | 3632398.6  |                                                                                                |            |        |    |                   |
| 902.094362 | 54426803.6 |                                                                                                |            |        |    |                   |
| 902.125287 | 3090601.0  |                                                                                                |            |        |    |                   |
| 902.199346 | 5273139.5  |                                                                                                |            |        |    |                   |
| 902.261185 | 51670610.6 |                                                                                                |            |        |    |                   |
| 902.288316 | 3391364.5  |                                                                                                |            |        |    |                   |
| 902.363916 | 8869288.8  |                                                                                                |            |        |    |                   |
| 902.428900 | 50566165.0 |                                                                                                |            |        |    |                   |
| 902.529753 | 6169131.9  |                                                                                                |            |        |    |                   |
| 902.598009 | 46777023.9 |                                                                                                |            |        |    |                   |
| 902.699884 | 4626140.1  |                                                                                                |            |        |    |                   |
| 902.764983 | 25456028.9 |                                                                                                |            |        |    |                   |
| 902.865066 | 3999736.7  |                                                                                                |            |        |    |                   |
| 902.930351 | 26276175.8 |                                                                                                |            |        |    |                   |
| 903.032390 | 4451918.8  |                                                                                                |            |        |    |                   |
| 903.096045 | 37038239.8 |                                                                                                |            |        |    |                   |
| 903.198117 | 3173038.1  |                                                                                                |            |        |    |                   |
| 903.264690 | 13219065.6 |                                                                                                |            |        |    |                   |
| 903.430834 | 13155618.9 |                                                                                                |            |        |    |                   |
| 903.597342 | 11467493.4 |                                                                                                |            |        |    |                   |
| 906.257419 | 3866925.9  |                                                                                                |            |        |    |                   |
| 906.929135 | 3003223.2  |                                                                                                |            |        |    |                   |
| 908.753519 | 5207769.1  |                                                                                                |            |        |    |                   |
| 909.088996 | 3230425.1  | C <sub>116</sub> H <sub>142</sub> N <sub>38</sub> O <sub>59</sub> P <sub>10</sub> S            | 909.089289 | 0.322  | -4 | a11 - 4H          |
| 909.200776 | 3358145.0  |                                                                                                |            |        |    |                   |

10

|            |            |                                                                                                   |            |       |    |                  |  |
|------------|------------|---------------------------------------------------------------------------------------------------|------------|-------|----|------------------|--|
| 909.255000 | 5205431.8  |                                                                                                   |            |       |    |                  |  |
| 922.759516 | 2983369.2  | C <sub>86</sub> H <sub>111</sub> N <sub>30</sub> O <sub>44</sub> P <sub>8</sub> S <sub>8</sub>    | 922.760626 | 1.203 | -3 | w8 + 1H          |  |
| 967.902186 | 3698548.3  |                                                                                                   |            |       |    |                  |  |
| 968.044343 | 3265220.3  |                                                                                                   |            |       |    |                  |  |
| 984.908281 | 3410037.1  |                                                                                                   |            |       |    |                  |  |
| 985.054354 | 2951388.9  |                                                                                                   |            |       |    |                  |  |
| 985.198640 | 3158064.3  |                                                                                                   |            |       |    |                  |  |
| 985.337275 | 3211890.8  |                                                                                                   |            |       |    |                  |  |
| 986.766406 | 4841165.6  |                                                                                                   |            |       |    |                  |  |
| 986.910824 | 15449642.8 |                                                                                                   |            |       |    |                  |  |
| 987.054617 | 8954735.1  |                                                                                                   |            |       |    |                  |  |
| 987.120747 | 3797546.3  |                                                                                                   |            |       |    |                  |  |
| 987.195943 | 19475001.5 |                                                                                                   |            |       |    |                  |  |
| 987.262958 | 3194815.5  |                                                                                                   |            |       |    |                  |  |
| 987.340632 | 19123306.7 |                                                                                                   |            |       |    |                  |  |
| 987.402788 | 3268537.8  |                                                                                                   |            |       |    |                  |  |
| 987.483562 | 31847439.1 |                                                                                                   |            |       |    |                  |  |
| 987.626065 | 22278877.5 |                                                                                                   |            |       |    |                  |  |
| 987.767688 | 10665400.8 |                                                                                                   |            |       |    |                  |  |
| 987.912080 | 11273522.3 |                                                                                                   |            |       |    |                  |  |
| 988.055396 | 9337844.1  |                                                                                                   |            |       |    |                  |  |
| 988.198773 | 3236598.0  |                                                                                                   |            |       |    |                  |  |
| 990.049628 | 4432301.6  |                                                                                                   |            |       |    |                  |  |
| 990.338864 | 3349697.0  |                                                                                                   |            |       |    |                  |  |
| 990.479634 | 3010650.7  |                                                                                                   |            |       |    |                  |  |
| 992.474910 | 3412538.6  |                                                                                                   |            |       |    |                  |  |
| 993.332789 | 3130027.9  | C <sub>121</sub> H <sub>155</sub> N <sub>41</sub> O <sub>65</sub> P <sub>12</sub> S <sub>12</sub> | 993.332314 | -     | -4 | w12 - B(dC) + 2H |  |
| 1075.11078 | 3795588.7  | C <sub>71</sub> H <sub>90</sub> N <sub>16</sub> O <sub>38</sub> P <sub>6</sub> S <sub>6</sub>     | 1075.11031 | -     | -2 | b7 - B(G) - H2O  |  |
| 3          |            |                                                                                                   | 9          | 0.432 |    |                  |  |
| 1075.61322 | 2951800.4  | C <sub>71</sub> H <sub>91</sub> N <sub>16</sub> O <sub>38</sub> P <sub>6</sub> S <sub>6</sub>     | 1075.61423 | 0.934 | -2 | a7 - B(G)        |  |
| 7          |            |                                                                                                   | 2          |       |    |                  |  |
| 1082.71432 | 7106031.2  | C <sub>172</sub> H <sub>217</sub> N <sub>56</sub> O <sub>88</sub> P <sub>15</sub> S <sub>15</sub> | 1082.71475 | 0.401 | -5 | M - 5H           |  |
| 2          |            |                                                                                                   | 6          |       |    |                  |  |
| 1082.91455 | 5968386.2  |                                                                                                   |            |       |    |                  |  |
| 4          |            |                                                                                                   |            |       |    |                  |  |
| 1083.11376 | 9363014.9  |                                                                                                   |            |       |    |                  |  |
| 3          |            |                                                                                                   |            |       |    |                  |  |
| 1083.31461 | 10429991.8 |                                                                                                   |            |       |    |                  |  |
| 6          |            |                                                                                                   |            |       |    |                  |  |
| 1083.51760 | 13720642.1 |                                                                                                   |            |       |    |                  |  |
| 1          |            |                                                                                                   |            |       |    |                  |  |
| 1083.71723 | 4125360.4  |                                                                                                   |            |       |    |                  |  |
| 1          |            |                                                                                                   |            |       |    |                  |  |
| 1084.31631 | 3253062.3  |                                                                                                   |            |       |    |                  |  |
| 5          |            |                                                                                                   |            |       |    |                  |  |
| 1084.51598 | 5229828.9  |                                                                                                   |            |       |    |                  |  |
| 3          |            |                                                                                                   |            |       |    |                  |  |
| 1087.71178 | 4392981.0  |                                                                                                   |            |       |    |                  |  |
| 4          |            |                                                                                                   |            |       |    |                  |  |
| 1087.91346 | 3327117.0  |                                                                                                   |            |       |    |                  |  |
| 6          |            |                                                                                                   |            |       |    |                  |  |
| 1090.50320 | 4306057.1  |                                                                                                   |            |       |    |                  |  |
| 5          |            |                                                                                                   |            |       |    |                  |  |
| 1091.10801 | 4152528.7  |                                                                                                   |            |       |    |                  |  |
| 2          |            |                                                                                                   |            |       |    |                  |  |
| 1136.14118 | 3152910.8  | C <sub>36</sub> H <sub>46</sub> N <sub>13</sub> O <sub>18</sub> P <sub>3</sub> S <sub>3</sub>     | 1136.13860 | -     | -1 | w3               |  |
| 4          |            |                                                                                                   | 0          | 2.274 |    |                  |  |
| 1151.39163 | 5036415.6  |                                                                                                   |            |       |    |                  |  |
| 8          |            |                                                                                                   |            |       |    |                  |  |

|            |            |                                                                                     |              |       |    |                                |
|------------|------------|-------------------------------------------------------------------------------------|--------------|-------|----|--------------------------------|
| 1151.56271 | 5714845.0  |                                                                                     |              |       |    |                                |
| 5          |            |                                                                                     |              |       |    |                                |
| 1151.72844 | 11301959.5 |                                                                                     |              |       |    |                                |
| 8          |            |                                                                                     |              |       |    |                                |
| 1151.89362 | 6484243.1  |                                                                                     |              |       |    |                                |
| 7          |            |                                                                                     |              |       |    |                                |
| 1152.06336 | 11121553.6 |                                                                                     |              |       |    |                                |
| 2          |            |                                                                                     |              |       |    |                                |
| 1152.22775 | 7846277.0  |                                                                                     |              |       |    |                                |
| 0          |            |                                                                                     |              |       |    |                                |
| 1152.39079 | 5152490.3  |                                                                                     |              |       |    |                                |
| 5          |            |                                                                                     |              |       |    |                                |
| 1152.56140 | 5474172.8  |                                                                                     |              |       |    |                                |
| 8          |            |                                                                                     |              |       |    |                                |
| 1152.72933 | 7238225.8  |                                                                                     |              |       |    |                                |
| 4          |            |                                                                                     |              |       |    |                                |
| 1152.89567 | 3983254.1  |                                                                                     |              |       |    |                                |
| 5          |            |                                                                                     |              |       |    |                                |
| 1353.89080 | 17725725.2 |                                                                                     |              |       |    |                                |
| 4          |            |                                                                                     |              |       |    |                                |
| 1354.14186 | 24843253.8 |                                                                                     |              |       |    |                                |
| 8          |            |                                                                                     |              |       |    |                                |
| 1354.39266 | 31627753.6 |                                                                                     |              |       |    |                                |
| 3          |            |                                                                                     |              |       |    |                                |
| 1354.64265 | 28219927.4 |                                                                                     |              |       |    |                                |
| 0          |            |                                                                                     |              |       |    |                                |
| 1354.89054 | 19147704.5 |                                                                                     |              |       |    |                                |
| 3          |            |                                                                                     |              |       |    |                                |
| 1355.14254 | 18588466.7 |                                                                                     |              |       |    |                                |
| 9          |            |                                                                                     |              |       |    |                                |
| 1355.39081 | 5421681.9  |                                                                                     |              |       |    |                                |
| 1          |            |                                                                                     |              |       |    |                                |
| 1355.64078 | 4497913.3  |                                                                                     |              |       |    |                                |
| 9          |            |                                                                                     |              |       |    |                                |
| 1382.06650 | 3677089.1  |                                                                                     |              |       |    |                                |
| 1          |            |                                                                                     |              |       |    |                                |
| 1382.47231 | 5281479.5  | C <sub>131</sub> H <sub>170</sub> N <sub>38</sub> O <sub>70</sub> P <sub>12</sub> S | 1382.47308   | 0.562 | -3 | b <sub>13</sub> - B(G) +<br>2H |
| 0          |            | <sub>12</sub>                                                                       | <sub>7</sub> |       |    |                                |
| 1382.67964 | 5580804.9  |                                                                                     |              |       |    |                                |
| 6          |            |                                                                                     |              |       |    |                                |
| 1382.87494 | 6145954.1  |                                                                                     |              |       |    |                                |
| 8          |            |                                                                                     |              |       |    |                                |
| 1383.07393 | 5358626.2  |                                                                                     |              |       |    |                                |
| 5          |            |                                                                                     |              |       |    |                                |
| 1383.27494 | 3489990.7  |                                                                                     |              |       |    |                                |
| 0          |            |                                                                                     |              |       |    |                                |
| 1383.47364 | 3775984.9  |                                                                                     |              |       |    |                                |
| 4          |            |                                                                                     |              |       |    |                                |
| 1861.76720 | 4008873.3  |                                                                                     |              |       |    |                                |
| 7          |            |                                                                                     |              |       |    |                                |
| 1861.90720 | 7424810.1  |                                                                                     |              |       |    |                                |
| 6          |            |                                                                                     |              |       |    |                                |
|            |            |                                                                                     | Abs mean     | 0.836 |    |                                |
|            |            |                                                                                     | error        |       |    |                                |
|            |            |                                                                                     | Abs mean     | 0.561 |    |                                |
|            |            |                                                                                     | std dev      |       |    |                                |

**Table S16 showing peak list, intensity, elemental composition, and possible assignments with mass errors (ppm) of danvatirsen using 2D-UVPD-MS of one scan and no denoising of [M-7H]<sup>7-</sup> precursor ion (note, noise peaks were included to highlight the effect of denoising).**

| Measured <i>mz</i> | Intensity  | Elemental Composition                                                                          | Theoretical <i>mz</i> | Error (ppm) | Charge | Assignment                   |
|--------------------|------------|------------------------------------------------------------------------------------------------|-----------------------|-------------|--------|------------------------------|
| 257.743018         | 3054017.6  |                                                                                                |                       |             |        |                              |
| 257.838549         | 4470294.5  |                                                                                                |                       |             |        |                              |
| 257.885957         | 4440145.0  |                                                                                                |                       |             |        |                              |
| 338.220557         | 4536924.0  |                                                                                                |                       |             |        |                              |
| 338.283188         | 8243577.1  |                                                                                                |                       |             |        |                              |
| 338.345524         | 4541607.9  |                                                                                                |                       |             |        |                              |
| 338.408288         | 3758850.7  |                                                                                                |                       |             |        |                              |
| 338.470372         | 3859704.5  |                                                                                                |                       |             |        |                              |
| 338.533449         | 3730898.6  |                                                                                                |                       |             |        |                              |
| 383.741607         | 4629790.9  |                                                                                                |                       |             |        |                              |
| 383.796928         | 3932545.8  |                                                                                                |                       |             |        |                              |
| 383.853130         | 3907723.9  |                                                                                                |                       |             |        |                              |
| 383.908333         | 8106623.7  |                                                                                                |                       |             |        |                              |
| 386.539011         | 6105768.6  |                                                                                                |                       |             |        |                              |
| 386.610846         | 9267559.3  |                                                                                                |                       |             |        |                              |
| 386.671008         | 4181881.4  |                                                                                                |                       |             |        |                              |
| 386.682377         | 25209057.9 |                                                                                                |                       |             |        |                              |
| 386.694857         | 4064044.6  |                                                                                                |                       |             |        |                              |
| 386.742643         | 4852775.4  |                                                                                                |                       |             |        |                              |
| 386.754026         | 32154720.5 |                                                                                                |                       |             |        |                              |
| 386.766252         | 4894855.4  |                                                                                                |                       |             |        |                              |
| 386.825202         | 21541311.3 |                                                                                                |                       |             |        |                              |
| 386.837830         | 3623072.6  |                                                                                                |                       |             |        |                              |
| 386.896866         | 18987130.9 |                                                                                                |                       |             |        |                              |
| 386.909253         | 3313955.6  |                                                                                                |                       |             |        |                              |
| 386.967973         | 6591003.0  |                                                                                                |                       |             |        |                              |
| 387.111120         | 9901828.0  |                                                                                                |                       |             |        |                              |
| 387.182522         | 5892286.1  |                                                                                                |                       |             |        |                              |
| 387.254094         | 3675868.3  |                                                                                                |                       |             |        |                              |
| 431.773069         | 3096885.6  |                                                                                                |                       |             |        |                              |
| 431.835562         | 4168550.4  | C <sub>70</sub> H <sub>86</sub> N <sub>18</sub> O <sub>38</sub> P <sub>6</sub> S <sub>6</sub>  | 431.834731            | -1.924      | -5     | a7 - B(dC) - CH <sub>3</sub> |
| 431.897815         | 4548378.6  |                                                                                                |                       |             |        |                              |
| 451.299125         | 3199415.0  |                                                                                                |                       |             |        |                              |
| 451.381818         | 3909722.6  |                                                                                                |                       |             |        |                              |
| 493.671343         | 3096599.1  |                                                                                                |                       |             |        |                              |
| 541.054834         | 3822943.9  |                                                                                                |                       |             |        |                              |
| 541.154239         | 3226515.8  |                                                                                                |                       |             |        |                              |
| 541.558064         | 3112684.4  |                                                                                                |                       |             |        |                              |
| 601.062245         | 4380772.9  |                                                                                                |                       |             |        |                              |
| 601.173569         | 11183086.7 |                                                                                                |                       |             |        |                              |
| 601.285089         | 15183211.9 |                                                                                                |                       |             |        |                              |
| 601.394608         | 19315669.2 |                                                                                                |                       |             |        |                              |
| 601.505789         | 25583675.3 |                                                                                                |                       |             |        |                              |
| 601.616886         | 14428755.7 |                                                                                                |                       |             |        |                              |
| 601.728315         | 12399125.9 |                                                                                                |                       |             |        |                              |
| 601.838914         | 4895505.1  |                                                                                                |                       |             |        |                              |
| 601.951441         | 8095568.1  |                                                                                                |                       |             |        |                              |
| 602.061745         | 5360282.7  | C <sub>96</sub> H <sub>117</sub> N <sub>35</sub> O <sub>47</sub> P <sub>8</sub> S <sub>8</sub> | 602.062878            | 1.882       | -5     | y9 - 4H                      |
| 627.669575         | 3232722.6  |                                                                                                |                       |             |        |                              |
| 627.759070         | 6592230.0  |                                                                                                |                       |             |        |                              |
| 627.849781         | 5104171.8  |                                                                                                |                       |             |        |                              |



|            |            |                                                                                               |            |       |    |                   |
|------------|------------|-----------------------------------------------------------------------------------------------|------------|-------|----|-------------------|
| 627.940575 | 8710254.6  |                                                                                               |            |       |    |                   |
| 628.033012 | 5637448.0  |                                                                                               |            |       |    |                   |
| 628.122889 | 3371172.4  |                                                                                               |            |       |    |                   |
| 628.214427 | 6858322.0  |                                                                                               |            |       |    |                   |
| 658.096656 | 3459640.5  | C <sub>46</sub> H <sub>57</sub> N <sub>12</sub> O <sub>22</sub> P <sub>3</sub> S <sub>3</sub> | 658.096992 | 0.511 | -2 | a4 - 2H, b4 - H2O |
| 674.449289 | 4831828.8  |                                                                                               |            |       |    |                   |
| 674.574816 | 4556358.6  |                                                                                               |            |       |    |                   |
| 674.699396 | 6832336.4  |                                                                                               |            |       |    |                   |
| 674.824621 | 3796775.0  |                                                                                               |            |       |    |                   |
| 674.947002 | 3879218.2  |                                                                                               |            |       |    |                   |
| 675.198501 | 4038278.8  |                                                                                               |            |       |    |                   |
| 676.285094 | 3269783.1  |                                                                                               |            |       |    |                   |
| 676.320460 | 15551372.8 |                                                                                               |            |       |    |                   |
| 676.408716 | 8884701.3  |                                                                                               |            |       |    |                   |
| 676.445731 | 73087061.5 |                                                                                               |            |       |    |                   |
| 676.533198 | 10231596.6 |                                                                                               |            |       |    |                   |
| 676.570584 | 68691221.6 |                                                                                               |            |       |    |                   |
| 676.659715 | 6648565.7  |                                                                                               |            |       |    |                   |
| 676.695159 | 34438424.9 |                                                                                               |            |       |    |                   |
| 676.784033 | 7201544.9  |                                                                                               |            |       |    |                   |
| 676.821493 | 51598120.0 |                                                                                               |            |       |    |                   |
| 676.910040 | 5379938.8  |                                                                                               |            |       |    |                   |
| 676.948449 | 11878370.1 |                                                                                               |            |       |    |                   |
| 677.036246 | 3857524.8  |                                                                                               |            |       |    |                   |
| 677.070495 | 41917446.8 |                                                                                               |            |       |    |                   |
| 677.159310 | 3697258.5  |                                                                                               |            |       |    |                   |
| 677.196747 | 27866366.9 |                                                                                               |            |       |    |                   |
| 677.320401 | 10866290.4 |                                                                                               |            |       |    |                   |
| 677.446515 | 5288286.2  |                                                                                               |            |       |    |                   |
| 677.572423 | 6276702.2  |                                                                                               |            |       |    |                   |
| 677.697586 | 3186574.0  |                                                                                               |            |       |    |                   |
| 677.821797 | 3185150.8  |                                                                                               |            |       |    |                   |
| 679.067430 | 3066444.9  |                                                                                               |            |       |    |                   |
| 679.193390 | 4274700.7  |                                                                                               |            |       |    |                   |
| 679.319817 | 3197339.3  |                                                                                               |            |       |    |                   |
| 679.445885 | 3005778.1  |                                                                                               |            |       |    |                   |
| 679.568462 | 3365939.6  |                                                                                               |            |       |    |                   |
| 679.817879 | 4533856.0  |                                                                                               |            |       |    |                   |
| 679.946564 | 3161114.6  |                                                                                               |            |       |    |                   |
| 681.189117 | 5738013.5  |                                                                                               |            |       |    |                   |
| 681.315107 | 5244729.8  |                                                                                               |            |       |    |                   |
| 681.438593 | 5101994.4  |                                                                                               |            |       |    |                   |
| 681.564584 | 7208783.6  |                                                                                               |            |       |    |                   |
| 681.689206 | 6500138.4  |                                                                                               |            |       |    |                   |
| 681.815089 | 3870640.1  |                                                                                               |            |       |    |                   |
| 690.535601 | 16609825.2 |                                                                                               |            |       |    |                   |
| 690.635542 | 10384274.5 |                                                                                               |            |       |    |                   |
| 690.736866 | 25747169.9 |                                                                                               |            |       |    |                   |
| 690.836519 | 26804443.9 |                                                                                               |            |       |    |                   |
| 690.934715 | 19968697.2 |                                                                                               |            |       |    |                   |
| 691.035930 | 19076640.4 |                                                                                               |            |       |    |                   |
| 691.137942 | 7118024.1  |                                                                                               |            |       |    |                   |
| 691.236319 | 10507995.0 |                                                                                               |            |       |    |                   |
| 691.335550 | 8622694.8  |                                                                                               |            |       |    |                   |
| 691.438021 | 5224004.4  |                                                                                               |            |       |    |                   |
| 693.136206 | 3280168.8  |                                                                                               |            |       |    |                   |
| 752.077346 | 3085700.5  |                                                                                               |            |       |    |                   |
| 752.588969 | 3210466.5  |                                                                                               |            |       |    |                   |
| 752.701511 | 4076241.8  |                                                                                               |            |       |    |                   |
| 752.812697 | 4295192.4  |                                                                                               |            |       |    |                   |

|            |            |                                                                                                |            |       |    |           |
|------------|------------|------------------------------------------------------------------------------------------------|------------|-------|----|-----------|
| 752.923264 | 3461498.7  |                                                                                                |            |       |    |           |
| 753.146383 | 3211561.2  |                                                                                                |            |       |    |           |
| 753.788654 | 7345333.4  |                                                                                                |            |       |    |           |
| 753.932869 | 17422002.3 |                                                                                                |            |       |    |           |
| 754.075353 | 23308653.3 |                                                                                                |            |       |    |           |
| 754.218061 | 12780099.7 |                                                                                                |            |       |    |           |
| 754.361153 | 10235168.8 |                                                                                                |            |       |    |           |
| 754.503512 | 5141778.4  |                                                                                                |            |       |    |           |
| 754.645626 | 4093328.0  |                                                                                                |            |       |    |           |
| 754.788757 | 4739214.9  |                                                                                                |            |       |    |           |
| 755.647109 | 3517469.1  |                                                                                                |            |       |    |           |
| 765.709599 | 5724461.3  |                                                                                                |            |       |    |           |
| 765.818701 | 3830052.2  |                                                                                                |            |       |    |           |
| 765.933097 | 6110335.4  |                                                                                                |            |       |    |           |
| 766.043618 | 5593989.0  |                                                                                                |            |       |    |           |
| 766.153461 | 4756891.1  |                                                                                                |            |       |    |           |
| 766.488695 | 3280794.1  |                                                                                                |            |       |    |           |
| 766.756694 | 3510616.3  |                                                                                                |            |       |    |           |
| 767.374521 | 25601728.5 |                                                                                                |            |       |    |           |
| 767.485537 | 36202389.7 |                                                                                                |            |       |    |           |
| 767.595153 | 57795763.0 |                                                                                                |            |       |    |           |
| 767.661739 | 5616130.5  |                                                                                                |            |       |    |           |
| 767.707687 | 84590585.9 |                                                                                                |            |       |    |           |
| 767.774450 | 4464286.9  |                                                                                                |            |       |    |           |
| 767.819951 | 28933444.3 | C <sub>96</sub> H <sub>122</sub> N <sub>31</sub> O <sub>50</sub> P <sub>9</sub> S <sub>9</sub> | 767.819768 | -     | -4 | c9 + 1H   |
|            |            |                                                                                                |            | 0.238 |    |           |
| 767.885116 | 4744660.9  |                                                                                                |            |       |    |           |
| 767.927401 | 17248571.7 |                                                                                                |            |       |    |           |
| 767.996047 | 4314929.1  |                                                                                                |            |       |    |           |
| 768.039620 | 21597257.3 |                                                                                                |            |       |    |           |
| 768.106318 | 3080580.4  | C <sub>51</sub> H <sub>66</sub> N <sub>16</sub> O <sub>24</sub> P <sub>4</sub> S <sub>4</sub>  | 768.106183 | -     | -2 | z5 - B(T) |
|            |            |                                                                                                |            | 0.176 |    |           |
| 768.152220 | 34310910.8 |                                                                                                |            |       |    |           |
| 768.264170 | 9055329.6  |                                                                                                |            |       |    |           |
| 768.376738 | 10869930.4 |                                                                                                |            |       |    |           |
| 768.800416 | 3758458.3  |                                                                                                |            |       |    |           |
| 768.820115 | 3221256.2  |                                                                                                |            |       |    |           |
| 769.927350 | 4305951.7  |                                                                                                |            |       |    |           |
| 770.038463 | 6963822.2  |                                                                                                |            |       |    |           |
| 770.149222 | 8157867.2  |                                                                                                |            |       |    |           |
| 770.261029 | 10106314.5 |                                                                                                |            |       |    |           |
| 770.373057 | 9609075.6  |                                                                                                |            |       |    |           |
| 770.483732 | 4974667.0  |                                                                                                |            |       |    |           |
| 770.594598 | 5777336.3  |                                                                                                |            |       |    |           |
| 770.703384 | 3687287.5  |                                                                                                |            |       |    |           |
| 770.798818 | 3878533.8  |                                                                                                |            |       |    |           |
| 770.942369 | 17549308.0 |                                                                                                |            |       |    |           |
| 771.084975 | 25017550.0 |                                                                                                |            |       |    |           |
| 771.228421 | 29087617.4 |                                                                                                |            |       |    |           |
| 771.370711 | 31061934.6 |                                                                                                |            |       |    |           |
| 771.486215 | 3422544.6  |                                                                                                |            |       |    |           |
| 771.513797 | 23583326.7 |                                                                                                |            |       |    |           |
| 771.591547 | 7413004.7  |                                                                                                |            |       |    |           |
| 771.656488 | 21175190.5 |                                                                                                |            |       |    |           |
| 771.702004 | 19395433.4 |                                                                                                |            |       |    |           |
| 771.756455 | 3202968.4  |                                                                                                |            |       |    |           |
| 771.796379 | 11102816.8 |                                                                                                |            |       |    |           |
| 771.814831 | 26510497.7 |                                                                                                |            |       |    |           |
| 771.923881 | 30397259.0 |                                                                                                |            |       |    |           |
| 771.944883 | 9501654.6  |                                                                                                |            |       |    |           |

|            |              |                                                                                                |            |       |    |            |
|------------|--------------|------------------------------------------------------------------------------------------------|------------|-------|----|------------|
| 771.983577 | 3178561.7    |                                                                                                |            |       |    |            |
| 772.034625 | 33634421.4   |                                                                                                |            |       |    |            |
| 772.145692 | 28637608.8   |                                                                                                |            |       |    |            |
| 772.226790 | 3272657.3    |                                                                                                |            |       |    |            |
| 772.235932 | 3433782.1    |                                                                                                |            |       |    |            |
| 772.257570 | 22152962.6   |                                                                                                |            |       |    |            |
| 772.368136 | 16950607.1   |                                                                                                |            |       |    |            |
| 772.415600 | 3316792.9    |                                                                                                |            |       |    |            |
| 772.479845 | 11932098.8   |                                                                                                |            |       |    |            |
| 772.593078 | 7928718.8    |                                                                                                |            |       |    |            |
| 772.704641 | 5870014.0    |                                                                                                |            |       |    |            |
| 772.763002 | 4996962.0    |                                                                                                |            |       |    |            |
| 772.797152 | 3571085.4    |                                                                                                |            |       |    |            |
| 772.819161 | 3938595.1    |                                                                                                |            |       |    |            |
| 772.838074 | 3199515.0    |                                                                                                |            |       |    |            |
| 772.857160 | 3034624.6    |                                                                                                |            |       |    |            |
| 772.873790 | 3120125.9    | C <sub>121</sub> H <sub>154</sub> N <sub>39</sub> O <sub>64</sub> P <sub>11</sub> S            | 772.873452 | -     | -5 | y12 - B(A) |
|            |              | 11                                                                                             |            | 0.437 |    |            |
| 772.891317 | 3577380.1    |                                                                                                |            |       |    |            |
| 772.906459 | 3613432.9    |                                                                                                |            |       |    |            |
| 772.930157 | 3395018.0    |                                                                                                |            |       |    |            |
| 772.944777 | 5176003.9    |                                                                                                |            |       |    |            |
| 772.952976 | 4758900.2    |                                                                                                |            |       |    |            |
| 772.967082 | 5496038.6    |                                                                                                |            |       |    |            |
| 773.002006 | 6776294.0    |                                                                                                |            |       |    |            |
| 773.031651 | 27394671.8   |                                                                                                |            |       |    |            |
| 773.044918 | 20443934.3   |                                                                                                |            |       |    |            |
| 773.060239 | 25253770.6   |                                                                                                |            |       |    |            |
| 773.081304 | 544244552.7  | C <sub>172</sub> H <sub>217</sub> N <sub>56</sub> O <sub>88</sub> P <sub>15</sub> S            | 773.079889 | 1.830 | -7 | M - 7H     |
|            |              | 15                                                                                             |            |       |    |            |
| 773.134779 | 21425911.2   |                                                                                                |            |       |    |            |
| 773.145180 | 19256027.4   |                                                                                                |            |       |    |            |
| 773.158053 | 21364662.7   |                                                                                                |            |       |    |            |
| 773.175169 | 70352008.6   |                                                                                                |            |       |    |            |
| 773.190466 | 48945930.3   |                                                                                                |            |       |    |            |
| 773.224486 | 1291497066.0 |                                                                                                |            |       |    |            |
| 773.255051 | 53273660.0   |                                                                                                |            |       |    |            |
| 773.268617 | 26489516.8   |                                                                                                |            |       |    |            |
| 773.278823 | 39491350.4   |                                                                                                |            |       |    |            |
| 773.290586 | 33643003.1   |                                                                                                |            |       |    |            |
| 773.317375 | 111483969.7  |                                                                                                |            |       |    |            |
| 773.336008 | 64310615.4   |                                                                                                |            |       |    |            |
| 773.367399 | 1956203527.0 |                                                                                                |            |       |    |            |
| 773.399689 | 64954835.9   |                                                                                                |            |       |    |            |
| 773.420525 | 44841276.0   |                                                                                                |            |       |    |            |
| 773.435755 | 31806716.4   |                                                                                                |            |       |    |            |
| 773.460283 | 141616830.2  |                                                                                                |            |       |    |            |
| 773.473812 | 76827231.6   |                                                                                                |            |       |    |            |
| 773.510628 | 2159600873.0 |                                                                                                |            |       |    |            |
| 773.533755 | 82603847.0   |                                                                                                |            |       |    |            |
| 773.563875 | 61875542.0   |                                                                                                |            |       |    |            |
| 773.574002 | 38707803.8   | C <sub>96</sub> H <sub>121</sub> N <sub>35</sub> O <sub>48</sub> P <sub>9</sub> S <sub>9</sub> | 773.573428 | -     | -4 | x9         |
|            |              |                                                                                                |            | 0.742 |    |            |
| 773.587629 | 38408955.4   |                                                                                                |            |       |    |            |
| 773.603098 | 137907798.4  |                                                                                                |            |       |    |            |
| 773.620103 | 73584558.6   |                                                                                                |            |       |    |            |
| 773.653476 | 1870845730.  |                                                                                                |            |       |    |            |

|            |             |
|------------|-------------|
|            | 0           |
| 773.684224 | 69499731.3  |
| 773.707775 | 45233435.6  |
| 773.720204 | 34081108.1  |
| 773.745161 | 121203503.0 |
| 773.771013 | 44580805.9  |
| 773.796324 | 1369702825. |
|            | 0           |
| 773.828507 | 41609164.8  |
| 773.849391 | 35744197.2  |
| 773.888484 | 85774045.7  |
| 773.905512 | 38477708.5  |
| 773.939281 | 961637709.0 |
| 773.968162 | 36531780.1  |
| 773.982234 | 16002425.0  |
| 773.993364 | 26497284.5  |
| 774.004315 | 16558688.1  |
| 774.031013 | 54694584.2  |
| 774.050888 | 23926512.7  |
| 774.081924 | 632774415.0 |
| 774.113776 | 20627469.2  |
| 774.135308 | 15555129.6  |
| 774.150192 | 7548584.6   |
| 774.174139 | 33139467.4  |
| 774.190593 | 13193571.1  |
| 774.225084 | 368702019.5 |
| 774.278173 | 10262201.3  |
| 774.288616 | 6237152.6   |
| 774.303097 | 5139427.4   |
| 774.317581 | 20354733.0  |
| 774.336332 | 9044983.3   |
| 774.367625 | 233899670.6 |
| 774.398841 | 7403915.3   |
| 774.422325 | 4911178.5   |
| 774.459967 | 10854660.0  |
| 774.510935 | 128665095.1 |
| 774.531660 | 5414047.7   |
| 774.563952 | 3028036.0   |
| 774.598839 | 5184823.9   |
| 774.653703 | 72817224.8  |
| 774.747840 | 6654400.4   |
| 774.796872 | 38008384.5  |
| 774.940277 | 19460013.4  |
| 775.082998 | 14836975.3  |
| 775.105197 | 3312431.3   |
| 775.224193 | 6146969.4   |
| 775.251424 | 5675569.4   |
| 775.346295 | 3462931.2   |
| 775.365444 | 5923559.3   |
| 775.415799 | 3692257.4   |
| 775.509368 | 4980711.1   |
| 775.651729 | 7430275.8   |
| 775.683100 | 4393480.9   |
| 775.794940 | 9467539.2   |
| 775.852504 | 3661733.0   |
| 775.937916 | 7970665.4   |
| 776.082241 | 5718293.9   |
| 776.170329 | 3172952.3   |
| 776.221483 | 42733631.5  |
| 776.274389 | 3167824.0   |

|            |             |                                                                                     |            |       |             |
|------------|-------------|-------------------------------------------------------------------------------------|------------|-------|-------------|
| 776.313517 | 6640415.1   |                                                                                     |            |       |             |
| 776.330479 | 3953219.8   |                                                                                     |            |       |             |
| 776.364678 | 95115493.5  |                                                                                     |            |       |             |
| 776.393825 | 4363988.6   |                                                                                     |            |       |             |
| 776.420185 | 2995037.9   |                                                                                     |            |       |             |
| 776.456378 | 10263386.9  |                                                                                     |            |       |             |
| 776.482621 | 4214725.2   |                                                                                     |            |       |             |
| 776.507488 | 128444299.7 |                                                                                     |            |       |             |
| 776.528721 | 6747355.6   |                                                                                     |            |       |             |
| 776.561027 | 4120818.8   |                                                                                     |            |       |             |
| 776.570451 | 3049638.1   |                                                                                     |            |       |             |
| 776.599104 | 10050151.7  |                                                                                     |            |       |             |
| 776.617371 | 5923226.6   |                                                                                     |            |       |             |
| 776.650423 | 142473468.4 |                                                                                     |            |       |             |
| 776.681658 | 5843923.9   |                                                                                     |            |       |             |
| 776.705166 | 3573768.8   |                                                                                     |            |       |             |
| 776.742400 | 10604913.4  |                                                                                     |            |       |             |
| 776.758314 | 4571394.7   |                                                                                     |            |       |             |
| 776.793336 | 121760019.6 |                                                                                     |            |       |             |
| 776.846784 | 3511206.7   |                                                                                     |            |       |             |
| 776.885502 | 7354180.2   |                                                                                     |            |       |             |
| 776.905564 | 3455114.8   |                                                                                     |            |       |             |
| 776.935997 | 90752218.0  |                                                                                     |            |       |             |
| 777.028900 | 4735807.7   |                                                                                     |            |       |             |
| 777.079187 | 58290809.8  |                                                                                     |            |       |             |
| 777.172440 | 3119100.6   |                                                                                     |            |       |             |
| 777.221843 | 36278248.0  |                                                                                     |            |       |             |
| 777.364284 | 19305211.8  |                                                                                     |            |       |             |
| 777.507942 | 11971205.6  |                                                                                     |            |       |             |
| 777.649732 | 4196602.6   |                                                                                     |            |       |             |
| 778.079414 | 3957644.9   |                                                                                     |            |       |             |
| 778.502388 | 26005226.8  |                                                                                     |            |       |             |
| 778.590434 | 4024816.9   |                                                                                     |            |       |             |
| 778.645592 | 44797787.1  |                                                                                     |            |       |             |
| 778.742568 | 8270869.9   |                                                                                     |            |       |             |
| 778.788833 | 74074741.7  |                                                                                     |            |       |             |
| 778.880027 | 5466502.9   |                                                                                     |            |       |             |
| 778.931657 | 66026108.9  |                                                                                     |            |       |             |
| 779.022518 | 4498825.3   |                                                                                     |            |       |             |
| 779.074242 | 52826020.1  |                                                                                     |            |       |             |
| 779.165931 | 4082560.0   |                                                                                     |            |       |             |
| 779.217231 | 37897437.8  |                                                                                     |            |       |             |
| 779.360142 | 26094613.4  |                                                                                     |            |       |             |
| 779.502775 | 13932460.8  |                                                                                     |            |       |             |
| 779.645547 | 8753264.3   |                                                                                     |            |       |             |
| 779.789467 | 5190608.6   |                                                                                     |            |       |             |
| 785.240832 | 4020643.9   |                                                                                     |            |       |             |
| 819.474598 | 3167699.5   | C <sub>126</sub> H <sub>162</sub> N <sub>44</sub> O <sub>66</sub> P <sub>12</sub> S | 819.476178 | 1.928 | -5 w12 + 2H |
| 819.675744 | 3306360.9   |                                                                                     |            |       |             |
| 838.286818 | 3596167.7   |                                                                                     |            |       |             |
| 838.540387 | 3326377.7   |                                                                                     |            |       |             |
| 847.164697 | 5544884.8   |                                                                                     |            |       |             |
| 847.290049 | 3106252.4   |                                                                                     |            |       |             |
| 848.041220 | 3516253.7   |                                                                                     |            |       |             |
| 858.078859 | 3348134.4   |                                                                                     |            |       |             |
| 858.245931 | 4301522.7   |                                                                                     |            |       |             |
| 861.424225 | 3174948.0   |                                                                                     |            |       |             |
| 861.545404 | 4917167.5   |                                                                                     |            |       |             |
| 861.675885 | 3351916.1   |                                                                                     |            |       |             |

|            |            |                                                                                                |            |       |    |                                  |
|------------|------------|------------------------------------------------------------------------------------------------|------------|-------|----|----------------------------------|
| 861.799066 | 4338150.2  |                                                                                                |            |       |    |                                  |
| 861.926247 | 7133959.6  |                                                                                                |            |       |    |                                  |
| 862.047084 | 4679740.8  |                                                                                                |            |       |    |                                  |
| 862.173959 | 6549358.4  |                                                                                                |            |       |    |                                  |
| 862.298911 | 3900412.8  |                                                                                                |            |       |    |                                  |
| 863.294908 | 6857935.7  |                                                                                                |            |       |    |                                  |
| 863.421897 | 18436727.9 |                                                                                                |            |       |    |                                  |
| 863.485038 | 3725184.6  | C <sub>136</sub> H <sub>170</sub> N <sub>46</sub> O <sub>70</sub> P <sub>12</sub> S            | 863.485860 | 0.952 | -5 | y13 - 2H                         |
|            |            | 12                                                                                             |            |       |    |                                  |
| 863.550536 | 15423093.6 |                                                                                                |            |       |    |                                  |
| 863.606030 | 3038803.3  |                                                                                                |            |       |    |                                  |
| 863.673384 | 35359392.5 |                                                                                                |            |       |    |                                  |
| 863.738775 | 4649346.2  |                                                                                                |            |       |    |                                  |
| 863.797382 | 23715647.9 |                                                                                                |            |       |    |                                  |
| 863.862342 | 5749217.7  |                                                                                                |            |       |    |                                  |
| 863.923008 | 20216200.7 |                                                                                                |            |       |    |                                  |
| 863.989063 | 5384521.0  |                                                                                                |            |       |    |                                  |
| 864.045614 | 33730529.3 |                                                                                                |            |       |    |                                  |
| 864.110900 | 3755997.9  |                                                                                                |            |       |    |                                  |
| 864.170644 | 31426406.1 |                                                                                                |            |       |    |                                  |
| 864.297230 | 10268272.1 |                                                                                                |            |       |    |                                  |
| 864.423670 | 4386946.8  |                                                                                                |            |       |    |                                  |
| 864.548533 | 6652309.5  |                                                                                                |            |       |    |                                  |
| 864.671123 | 4265382.1  |                                                                                                |            |       |    |                                  |
| 866.419410 | 5060901.6  |                                                                                                |            |       |    |                                  |
| 866.545614 | 4554690.8  |                                                                                                |            |       |    |                                  |
| 866.794296 | 4026703.1  |                                                                                                |            |       |    |                                  |
| 866.921676 | 4045925.6  |                                                                                                |            |       |    |                                  |
| 868.286379 | 3092324.5  |                                                                                                |            |       |    |                                  |
| 879.921558 | 3122296.7  |                                                                                                |            |       |    |                                  |
| 880.256587 | 3299492.1  |                                                                                                |            |       |    |                                  |
| 881.429472 | 3629105.4  |                                                                                                |            |       |    |                                  |
| 882.098480 | 5568694.9  |                                                                                                |            |       |    |                                  |
| 882.433468 | 3944008.3  |                                                                                                |            |       |    |                                  |
| 887.099613 | 5274598.1  |                                                                                                |            |       |    |                                  |
| 887.599379 | 3594033.9  | C <sub>56</sub> H <sub>74</sub> N <sub>18</sub> O <sub>29</sub> P <sub>5</sub> S <sub>5</sub>  | 887.600761 | 1.557 | -2 | w5 + 1H                          |
| 902.094651 | 5175429.0  |                                                                                                |            |       |    |                                  |
| 902.201155 | 4101773.7  |                                                                                                |            |       |    |                                  |
| 902.261157 | 11544671.9 |                                                                                                |            |       |    |                                  |
| 902.369096 | 3747892.0  |                                                                                                |            |       |    |                                  |
| 902.428117 | 34385801.5 |                                                                                                |            |       |    |                                  |
| 902.530565 | 4255616.4  |                                                                                                |            |       |    |                                  |
| 902.598862 | 23433822.2 |                                                                                                |            |       |    |                                  |
| 902.694875 | 5172260.1  |                                                                                                |            |       |    |                                  |
| 902.764576 | 35348980.2 |                                                                                                |            |       |    |                                  |
| 902.863224 | 3718916.9  |                                                                                                |            |       |    |                                  |
| 902.933822 | 7416807.1  |                                                                                                |            |       |    |                                  |
| 903.095854 | 28958001.7 |                                                                                                |            |       |    |                                  |
| 903.261844 | 21830635.0 |                                                                                                |            |       |    |                                  |
| 903.430702 | 4806344.7  |                                                                                                |            |       |    |                                  |
| 905.925429 | 3073164.0  |                                                                                                |            |       |    |                                  |
| 906.260135 | 5627168.8  |                                                                                                |            |       |    |                                  |
| 908.753685 | 5611756.3  |                                                                                                |            |       |    |                                  |
| 909.594171 | 3155045.0  | C <sub>116</sub> H <sub>144</sub> N <sub>38</sub> O <sub>59</sub> P <sub>10</sub> S            | 909.593201 | -     | -4 | a11 - 2H, b11 - H <sub>2</sub> O |
|            |            | 10                                                                                             |            | 1.066 |    |                                  |
| 909.845609 | 4348319.5  |                                                                                                |            |       |    |                                  |
| 922.425050 | 5918341.6  | C <sub>86</sub> H <sub>110</sub> N <sub>30</sub> O <sub>44</sub> P <sub>8</sub> S <sub>8</sub> | 922.424684 | -     | -3 | w8                               |
|            |            |                                                                                                |            | 0.397 |    |                                  |
| 923.095746 | 4241424.0  | C <sub>61</sub> H <sub>77</sub> N <sub>14</sub> O <sub>33</sub> P <sub>5</sub> S <sub>5</sub>  | 923.096179 | 0.469 | -2 | b6 - B(T) - 2H                   |
| 967.902837 | 4151589.1  |                                                                                                |            |       |    |                                  |

|             |            |                                                                                                   |             |        |    |                   |  |
|-------------|------------|---------------------------------------------------------------------------------------------------|-------------|--------|----|-------------------|--|
| 968.044500  | 3734020.7  |                                                                                                   |             |        |    |                   |  |
| 968.333185  | 3043272.2  |                                                                                                   |             |        |    |                   |  |
| 978.621335  | 3440072.3  |                                                                                                   |             |        |    |                   |  |
| 986.765884  | 5960020.0  |                                                                                                   |             |        |    |                   |  |
| 986.909570  | 8953948.3  |                                                                                                   |             |        |    |                   |  |
| 987.050642  | 17746801.1 |                                                                                                   |             |        |    |                   |  |
| 987.192503  | 13556670.8 |                                                                                                   |             |        |    |                   |  |
| 987.341248  | 26739502.1 |                                                                                                   |             |        |    |                   |  |
| 987.484432  | 23429293.1 |                                                                                                   |             |        |    |                   |  |
| 987.624034  | 14436886.9 |                                                                                                   |             |        |    |                   |  |
| 987.768381  | 16992280.7 |                                                                                                   |             |        |    |                   |  |
| 987.910174  | 13805289.2 |                                                                                                   |             |        |    |                   |  |
| 988.052659  | 12029292.8 |                                                                                                   |             |        |    |                   |  |
| 988.194762  | 4052850.4  |                                                                                                   |             |        |    |                   |  |
| 988.338898  | 3481989.4  |                                                                                                   |             |        |    |                   |  |
| 988.483293  | 3825607.2  | C <sub>157</sub> H <sub>200</sub> N <sub>41</sub> O <sub>84</sub> P <sub>15</sub> S <sub>15</sub> | 988.482997  | -0.299 | -5 | M - 5H - H2O - 3G |  |
| 990.476305  | 3320268.7  |                                                                                                   |             |        |    |                   |  |
| 990.624617  | 3067207.2  |                                                                                                   |             |        |    |                   |  |
| 992.757896  | 3719915.1  |                                                                                                   |             |        |    |                   |  |
| 1024.345217 | 3783891.7  | C <sub>126</sub> H <sub>161</sub> N <sub>44</sub> O <sub>66</sub> P <sub>12</sub> S <sub>12</sub> | 1024.345086 | -0.128 | -4 | w12 + 1H          |  |
| 1052.303290 | 5622486.1  | C <sub>167</sub> H <sub>211</sub> N <sub>51</sub> O <sub>87</sub> P <sub>15</sub> S <sub>15</sub> | 1052.303309 | 0.018  | -5 | M - 5H - 4H - G   |  |
| 1052.503999 | 7405075.9  |                                                                                                   |             |        |    |                   |  |
| 1052.702795 | 7833578.0  |                                                                                                   |             |        |    |                   |  |
| 1052.904320 | 5294575.1  |                                                                                                   |             |        |    |                   |  |
| 1055.901830 | 3100235.0  |                                                                                                   |             |        |    |                   |  |
| 1075.110112 | 3267878.0  | C <sub>71</sub> H <sub>90</sub> N <sub>16</sub> O <sub>38</sub> P <sub>6</sub> S <sub>6</sub>     | 1075.110319 | 0.193  | -2 | b7 - B(G) - H2O   |  |
| 1075.863462 | 3326007.0  |                                                                                                   |             |        |    |                   |  |
| 1076.362789 | 3645160.8  |                                                                                                   |             |        |    |                   |  |
| 1082.312570 | 10466432.4 | C <sub>172</sub> H <sub>215</sub> N <sub>56</sub> O <sub>88</sub> P <sub>15</sub> S <sub>15</sub> | 1082.311626 | -0.872 | -5 | M - 7H            |  |
| 1082.615485 | 3083246.9  |                                                                                                   |             |        |    |                   |  |
| 1082.912544 | 36286291.5 |                                                                                                   |             |        |    |                   |  |
| 1083.017721 | 3002794.0  |                                                                                                   |             |        |    |                   |  |
| 1083.113847 | 36452864.1 |                                                                                                   |             |        |    |                   |  |
| 1083.315136 | 17896598.9 |                                                                                                   |             |        |    |                   |  |
| 1083.421040 | 3103759.3  |                                                                                                   |             |        |    |                   |  |
| 1083.516125 | 21661937.4 |                                                                                                   |             |        |    |                   |  |
| 1083.717240 | 12776943.2 |                                                                                                   |             |        |    |                   |  |
| 1083.915098 | 10887387.2 |                                                                                                   |             |        |    |                   |  |
| 1084.112361 | 4803423.8  |                                                                                                   |             |        |    |                   |  |

|            |            |                                  |            |                  |       |                                   |
|------------|------------|----------------------------------|------------|------------------|-------|-----------------------------------|
| 1084.31283 | 5945151.7  |                                  |            |                  |       |                                   |
| 7          |            |                                  |            |                  |       |                                   |
| 1087.71303 | 5082201.7  |                                  |            |                  |       |                                   |
| 3          |            |                                  |            |                  |       |                                   |
| 1087.90614 | 4270487.7  |                                  |            |                  |       |                                   |
| 1          |            |                                  |            |                  |       |                                   |
| 1088.10762 | 3107436.5  | $C_{71}H_{88}N_{18}O_{38}P_6S_6$ | 1088.10556 | -                | -2    | b7 - B(T) - NH3, b7 - B(dC) - H2O |
| 3          |            |                                  | 8          | 1.889            |       |                                   |
| 1091.30841 | 3665822.8  |                                  |            |                  |       |                                   |
| 6          |            |                                  |            |                  |       |                                   |
| 1136.13729 | 3295350.0  | $C_{36}H_{46}N_{13}O_{18}P_3S_3$ | 1136.13860 | 1.147            | -1    | w3                                |
| 7          |            |                                  | 0          |                  |       |                                   |
| 1151.56176 | 3741146.2  |                                  |            |                  |       |                                   |
| 1          |            |                                  |            |                  |       |                                   |
| 1151.72959 | 6737100.1  |                                  |            |                  |       |                                   |
| 5          |            |                                  |            |                  |       |                                   |
| 1151.89402 | 17000089.1 |                                  |            |                  |       |                                   |
| 2          |            |                                  |            |                  |       |                                   |
| 1152.06150 | 18328471.2 |                                  |            |                  |       |                                   |
| 1          |            |                                  |            |                  |       |                                   |
| 1152.23362 | 5446595.1  |                                  |            |                  |       |                                   |
| 7          |            |                                  |            |                  |       |                                   |
| 1152.38953 | 8271059.4  |                                  |            |                  |       |                                   |
| 0          |            |                                  |            |                  |       |                                   |
| 1152.72524 | 3471172.8  |                                  |            |                  |       |                                   |
| 4          |            |                                  |            |                  |       |                                   |
| 1353.89064 | 5310646.4  |                                  |            |                  |       |                                   |
| 2          |            |                                  |            |                  |       |                                   |
| 1354.13580 | 6076402.0  |                                  |            |                  |       |                                   |
| 8          |            |                                  |            |                  |       |                                   |
| 1354.38901 | 4319268.8  |                                  |            |                  |       |                                   |
| 2          |            |                                  |            |                  |       |                                   |
| 1354.63958 | 4682717.7  |                                  |            |                  |       |                                   |
| 9          |            |                                  |            |                  |       |                                   |
| 1355.14018 | 5207944.7  |                                  |            |                  |       |                                   |
| 8          |            |                                  |            |                  |       |                                   |
| 1382.47698 | 3860447.3  |                                  |            |                  |       |                                   |
| 9          |            |                                  |            |                  |       |                                   |
| 1382.67222 | 6238887.5  |                                  |            |                  |       |                                   |
| 5          |            |                                  |            |                  |       |                                   |
| 1382.86852 | 6115882.6  |                                  |            |                  |       |                                   |
| 8          |            |                                  |            |                  |       |                                   |
| 1861.93905 | 3760599.8  |                                  |            |                  |       |                                   |
| 0          |            |                                  |            |                  |       |                                   |
|            |            |                                  |            | Abs mean error   | 0.959 |                                   |
|            |            |                                  |            | Abs mean std dev | 0.630 |                                   |



**Table S17 showing peak list, intensity, elemental composition, and possible assignments with mass errors (ppm) of danvatirsen using 2D-UVPD-MS of eight scans accumulated denoised (same rank 10) [M-8H]<sup>8-</sup> precursor ion (note, noise peaks were included to highlight the effect of denoising).**

| Measured<br><i>mz</i> | Intensity   | Elemental<br>Composition | Theoretical<br><i>mz</i> | Error<br>(ppm<br>) | Charge | Assignment |
|-----------------------|-------------|--------------------------|--------------------------|--------------------|--------|------------|
| 225.438894            | 11759881.8  |                          |                          |                    |        |            |
| 225.480452            | 20634793.2  |                          |                          |                    |        |            |
| 225.522342            | 22940480.3  |                          |                          |                    |        |            |
| 225.560402            | 15049862.9  |                          |                          |                    |        |            |
| 225.564129            | 30139274.8  |                          |                          |                    |        |            |
| 225.606010            | 31214371.5  |                          |                          |                    |        |            |
| 225.647282            | 15226010.1  |                          |                          |                    |        |            |
| 225.689377            | 11952232.0  |                          |                          |                    |        |            |
| 255.829077            | 19316912.4  |                          |                          |                    |        |            |
| 255.866098            | 23910769.7  |                          |                          |                    |        |            |
| 255.903160            | 25059992.8  |                          |                          |                    |        |            |
| 255.940238            | 24048392.3  |                          |                          |                    |        |            |
| 255.977294            | 17413053.6  |                          |                          |                    |        |            |
| 256.014316            | 13404631.2  |                          |                          |                    |        |            |
| 257.694575            | 12111649.4  |                          |                          |                    |        |            |
| 257.742248            | 24770340.7  |                          |                          |                    |        |            |
| 257.789898            | 27844872.7  |                          |                          |                    |        |            |
| 257.832177            | 11282582.8  |                          |                          |                    |        |            |
| 257.837472            | 30063962.0  |                          |                          |                    |        |            |
| 257.879829            | 10832184.7  |                          |                          |                    |        |            |
| 257.885183            | 26087329.1  |                          |                          |                    |        |            |
| 257.932820            | 18189140.3  |                          |                          |                    |        |            |
| 287.809916            | 12224024.4  |                          |                          |                    |        |            |
| 287.851524            | 19088202.0  |                          |                          |                    |        |            |
| 287.893375            | 23352918.3  |                          |                          |                    |        |            |
| 287.935039            | 23404561.1  |                          |                          |                    |        |            |
| 287.976749            | 18066402.6  |                          |                          |                    |        |            |
| 288.018354            | 12791091.4  |                          |                          |                    |        |            |
| 300.757856            | 12114244.0  |                          |                          |                    |        |            |
| 300.813646            | 14876660.7  |                          |                          |                    |        |            |
| 300.869299            | 14157373.4  |                          |                          |                    |        |            |
| 300.925009            | 11930000.1  |                          |                          |                    |        |            |
| 338.149141            | 10712040.1  |                          |                          |                    |        |            |
| 338.157663            | 87496660.8  |                          |                          |                    |        |            |
| 338.211932            | 25313685.0  |                          |                          |                    |        |            |
| 338.220417            | 179438609.1 |                          |                          |                    |        |            |
| 338.229914            | 25158880.2  |                          |                          |                    |        |            |
| 338.274382            | 42462733.5  |                          |                          |                    |        |            |
| 338.282946            | 239275059.3 |                          |                          |                    |        |            |
| 338.289055            | 12630329.4  |                          |                          |                    |        |            |
| 338.292419            | 29952086.6  |                          |                          |                    |        |            |
| 338.336868            | 19068334.8  |                          |                          |                    |        |            |
| 338.345227            | 123987189.9 |                          |                          |                    |        |            |
| 338.354953            | 14619717.5  |                          |                          |                    |        |            |
| 338.399557            | 25423334.6  |                          |                          |                    |        |            |
| 338.408134            | 136304451.1 |                          |                          |                    |        |            |
| 338.417649            | 16033759.5  |                          |                          |                    |        |            |
| 338.462448            | 23211803.7  |                          |                          |                    |        |            |
| 338.470541            | 164508897.3 |                          |                          |                    |        |            |
| 338.480134            | 18904252.7  |                          |                          |                    |        |            |
| 338.524719            | 18800334.1  |                          |                          |                    |        |            |
| 338.532957            | 116778531.4 |                          |                          |                    |        |            |

|            |            |                                                                                               |            |       |    |         |
|------------|------------|-----------------------------------------------------------------------------------------------|------------|-------|----|---------|
| 338.542190 | 13894130.8 |                                                                                               |            |       |    |         |
| 338.595473 | 50540979.9 |                                                                                               |            |       |    |         |
| 338.658052 | 22870862.8 |                                                                                               |            |       |    |         |
| 338.720632 | 28422035.2 |                                                                                               |            |       |    |         |
| 338.783508 | 19795351.5 |                                                                                               |            |       |    |         |
| 339.531323 | 10858874.0 |                                                                                               |            |       |    |         |
| 339.656903 | 15955030.8 |                                                                                               |            |       |    |         |
| 339.719531 | 22426611.3 |                                                                                               |            |       |    |         |
| 339.782073 | 19636334.9 |                                                                                               |            |       |    |         |
| 339.843803 | 11417560.0 |                                                                                               |            |       |    |         |
| 345.416177 | 11205086.2 |                                                                                               |            |       |    |         |
| 345.465623 | 10793357.8 |                                                                                               |            |       |    |         |
| 383.685380 | 14716396.0 |                                                                                               |            |       |    |         |
| 383.741213 | 17070903.4 |                                                                                               |            |       |    |         |
| 383.796586 | 17608415.3 |                                                                                               |            |       |    |         |
| 383.852286 | 24222443.1 |                                                                                               |            |       |    |         |
| 383.907967 | 24711214.2 |                                                                                               |            |       |    |         |
| 383.963316 | 16825734.4 |                                                                                               |            |       |    |         |
| 386.610815 | 19282546.1 |                                                                                               |            |       |    |         |
| 386.682605 | 26562856.6 |                                                                                               |            |       |    |         |
| 386.753211 | 24873864.5 |                                                                                               |            |       |    |         |
| 386.825391 | 27988552.3 |                                                                                               |            |       |    |         |
| 386.897146 | 13175529.8 |                                                                                               |            |       |    |         |
| 386.968469 | 14930597.8 |                                                                                               |            |       |    |         |
| 387.039541 | 11078221.4 |                                                                                               |            |       |    |         |
| 431.709955 | 15912016.4 |                                                                                               |            |       |    |         |
| 431.772121 | 17833350.7 |                                                                                               |            |       |    |         |
| 431.898385 | 17286147.8 |                                                                                               |            |       |    |         |
| 431.960695 | 16153512.0 |                                                                                               |            |       |    |         |
| 432.023703 | 16884895.7 |                                                                                               |            |       |    |         |
| 432.086242 | 12546612.9 |                                                                                               |            |       |    |         |
| 451.047579 | 13153659.7 |                                                                                               |            |       |    |         |
| 451.215157 | 16094341.2 |                                                                                               |            |       |    |         |
| 451.298468 | 10755289.6 |                                                                                               |            |       |    |         |
| 451.381117 | 15957339.9 |                                                                                               |            |       |    |         |
| 451.465164 | 14513489.1 |                                                                                               |            |       |    |         |
| 493.528031 | 12893472.7 |                                                                                               |            |       |    |         |
| 493.599935 | 11644258.1 |                                                                                               |            |       |    |         |
| 493.671163 | 12400816.6 |                                                                                               |            |       |    |         |
| 541.153697 | 12374991.5 |                                                                                               |            |       |    |         |
| 541.355479 | 10756654.8 |                                                                                               |            |       |    |         |
| 601.062029 | 14595940.1 |                                                                                               |            |       |    |         |
| 601.171233 | 25327542.0 |                                                                                               |            |       |    |         |
| 601.282872 | 40403789.2 |                                                                                               |            |       |    |         |
| 601.394917 | 92949580.8 |                                                                                               |            |       |    |         |
| 601.506636 | 82231459.5 |                                                                                               |            |       |    |         |
| 601.617600 | 58733483.0 |                                                                                               |            |       |    |         |
| 601.728632 | 52108203.6 |                                                                                               |            |       |    |         |
| 601.839887 | 31549002.7 |                                                                                               |            |       |    |         |
| 601.949923 | 22619237.6 |                                                                                               |            |       |    |         |
| 602.172615 | 12713756.9 |                                                                                               |            |       |    |         |
| 603.948997 | 14164293.4 |                                                                                               |            |       |    |         |
| 604.059083 | 13391735.6 |                                                                                               |            |       |    |         |
| 605.500416 | 14636254.1 |                                                                                               |            |       |    |         |
| 609.559319 | 13537658.8 | C <sub>76</sub> H <sub>99</sub> N <sub>25</sub> O <sub>40</sub> P <sub>7</sub> S <sub>7</sub> | 609.559960 | 1.052 | -4 | w7 + 1H |
| 609.809664 | 10899912.7 |                                                                                               |            |       |    |         |
| 627.666897 | 11054005.1 |                                                                                               |            |       |    |         |
| 627.849803 | 24703999.1 |                                                                                               |            |       |    |         |
| 628.032160 | 15285161.7 |                                                                                               |            |       |    |         |
| 628.122443 | 20155409.5 |                                                                                               |            |       |    |         |

|            |              |                                     |            |       |    |                                |
|------------|--------------|-------------------------------------|------------|-------|----|--------------------------------|
| 628.211554 | 15632809.5   |                                     |            |       |    |                                |
| 657.594107 | 16071412.9   |                                     |            |       |    |                                |
| 657.814485 | 13297545.3   |                                     |            |       |    |                                |
| 657.939406 | 11246564.8   |                                     |            |       |    |                                |
| 658.096570 | 19999589.3   | $C_{46}H_{57}N_{12}O_{22}P_3S_3$    | 658.096992 | 0.641 | -2 | a4 - 2H, b4 - H <sub>2</sub> O |
| 659.438772 | 15934196.6   |                                     |            |       |    |                                |
| 659.564405 | 31480666.9   |                                     |            |       |    |                                |
| 659.689051 | 56689889.6   |                                     |            |       |    |                                |
| 659.814158 | 71027739.8   |                                     |            |       |    |                                |
| 659.939718 | 38934465.7   |                                     |            |       |    |                                |
| 660.064439 | 30666402.6   |                                     |            |       |    |                                |
| 660.190322 | 17446197.9   |                                     |            |       |    |                                |
| 660.315540 | 12373038.4   |                                     |            |       |    |                                |
| 674.322732 | 58835771.6   |                                     |            |       |    |                                |
| 674.426800 | 19389511.2   | $C_{66}H_{85}N_{23}O_{32}P_5S_5$    | 674.426811 | 0.016 | -3 | y6 + 1H                        |
| 674.447992 | 126915113.7  |                                     |            |       |    |                                |
| 674.573359 | 223545789.8  |                                     |            |       |    |                                |
| 674.663555 | 12075475.4   |                                     |            |       |    |                                |
| 674.698183 | 243971952.9  |                                     |            |       |    |                                |
| 674.785443 | 13397877.6   |                                     |            |       |    |                                |
| 674.798655 | 10617579.7   |                                     |            |       |    |                                |
| 674.823262 | 238662689.2  |                                     |            |       |    |                                |
| 674.910511 | 13483108.4   |                                     |            |       |    |                                |
| 674.948469 | 198142699.3  |                                     |            |       |    |                                |
| 675.037127 | 11218940.4   |                                     |            |       |    |                                |
| 675.073201 | 140015943.5  |                                     |            |       |    |                                |
| 675.197719 | 99927066.2   |                                     |            |       |    |                                |
| 675.323510 | 62319977.8   |                                     |            |       |    |                                |
| 675.448337 | 41352931.9   |                                     |            |       |    |                                |
| 675.573971 | 20435996.4   |                                     |            |       |    |                                |
| 675.695040 | 13328474.6   |                                     |            |       |    |                                |
| 675.895646 | 11420838.4   |                                     |            |       |    |                                |
| 676.065715 | 13189434.3   |                                     |            |       |    |                                |
| 676.075682 | 12308493.9   |                                     |            |       |    |                                |
| 676.092080 | 10842609.9   |                                     |            |       |    |                                |
| 676.100429 | 11111300.4   |                                     |            |       |    |                                |
| 676.110337 | 11349554.3   |                                     |            |       |    |                                |
| 676.118526 | 12715203.9   |                                     |            |       |    |                                |
| 676.128294 | 12116991.3   |                                     |            |       |    |                                |
| 676.136328 | 13168017.5   |                                     |            |       |    |                                |
| 676.145405 | 13258734.0   |                                     |            |       |    |                                |
| 676.154486 | 14586209.5   |                                     |            |       |    |                                |
| 676.163228 | 13046430.0   |                                     |            |       |    |                                |
| 676.171489 | 15235822.9   |                                     |            |       |    |                                |
| 676.182074 | 16363957.0   |                                     |            |       |    |                                |
| 676.200437 | 20054946.6   |                                     |            |       |    |                                |
| 676.206624 | 21674916.1   |                                     |            |       |    |                                |
| 676.216863 | 20947177.6   |                                     |            |       |    |                                |
| 676.224569 | 21557275.7   |                                     |            |       |    |                                |
| 676.234155 | 27540640.5   |                                     |            |       |    |                                |
| 676.243095 | 25811434.0   |                                     |            |       |    |                                |
| 676.260331 | 43927533.2   |                                     |            |       |    |                                |
| 676.271067 | 57832387.5   |                                     |            |       |    |                                |
| 676.284199 | 266512846.3  |                                     |            |       |    |                                |
| 676.319538 | 3711907137.0 | $C_{172}H_{217}N_{56}O_{88}P_{15}S$ | 676.318994 | 0.804 | -8 | M - 8H                         |
| 676.344221 | 122748138.1  |                                     |            |       |    |                                |
| 676.357581 | 105215032.7  |                                     |            |       |    |                                |
| 676.364999 | 86789533.3   |                                     |            |       |    |                                |
| 676.377036 | 93934400.6   |                                     |            |       |    |                                |

|            |              |
|------------|--------------|
| 676.384853 | 118898764.8  |
| 676.394530 | 139707029.2  |
| 676.409694 | 681588094.7  |
| 676.445016 | 8946301569.0 |
| 676.468470 | 313852942.8  |
| 676.479144 | 227731385.2  |
| 676.486099 | 222884341.3  |
| 676.495918 | 175606497.7  |
| 676.507075 | 180599524.6  |
| 676.534611 | 1100705827.0 |
| 676.570285 | 14380099779. |
|            | 0            |
| 676.591569 | 511561143.3  |
| 676.603100 | 336986336.0  |
| 676.610839 | 359014971.1  |
| 676.620157 | 276203590.0  |
| 676.629859 | 261079230.4  |
| 676.638203 | 272598834.7  |
| 676.659515 | 1304192660.0 |
| 676.695440 | 17367096566. |
|            | 0            |
| 676.726580 | 353435851.9  |
| 676.735440 | 411562048.5  |
| 676.744341 | 308235577.6  |
| 676.754013 | 277297230.9  |
| 676.762469 | 295354426.1  |
| 676.784195 | 1201765070.0 |
| 676.820452 | 15681695238. |
|            | 0            |
| 676.860069 | 352465332.8  |
| 676.868327 | 260396222.5  |
| 676.878288 | 226356326.1  |
| 676.886846 | 247095927.5  |
| 676.897894 | 261595134.5  |
| 676.908859 | 942932701.8  |
| 676.922612 | 390204927.6  |
| 676.945455 | 11780666661. |
|            | 0            |
| 676.984792 | 246655934.5  |
| 677.002517 | 154393241.2  |
| 677.011312 | 170076783.2  |
| 677.021109 | 180209311.3  |
| 677.033985 | 664340382.2  |
| 677.046859 | 281418317.0  |
| 677.070428 | 8134591761.0 |
| 677.094059 | 233801278.3  |
| 677.109566 | 160945079.8  |
| 677.136844 | 125694943.2  |
| 677.144908 | 110006933.3  |
| 677.158949 | 455099725.8  |
| 677.171020 | 182582823.0  |
| 677.195462 | 5328473713.0 |
| 677.219211 | 172919024.3  |
| 677.235790 | 128669115.7  |
| 677.259646 | 60592558.5   |
| 677.269382 | 62354637.2   |
| 677.283984 | 272667448.5  |
| 677.295124 | 107350327.9  |
| 677.320477 | 3226159269.0 |
| 677.356370 | 58459941.3   |

677.361785 62646460.9  
 677.370367 42223713.5  
 677.389604 36580606.4  
 677.408965 154163562.6  
 677.422944 75908193.5  
 677.445660 1864000626.0  
 677.468202 63876438.1  
 677.480807 37466371.6  
 677.486267 38981509.7  
 677.495574 25988168.9  
 677.506891 22988654.2  
 677.523063 41734965.4  
 677.536474 55327023.7  
 677.544742 35182583.7  
 677.570750 1004292209.0  
 677.605407 21451896.3  
 677.612047 25253645.6  
 677.624463 29162445.6  
 677.635066 32143943.7  
 677.658773 27185132.0  
 677.670561 21100586.1  
 677.695757 508171581.0  
 677.718316 22570678.5  
 677.735862 22667412.9  
 677.745075 11447705.9  
 677.754819 11147948.8  
 677.783352 25030779.3  
 677.796265 11388058.9  
 677.820548 272107067.6  
 677.856666 37590108.6  
  
 677.908060 12948281.7  
 677.924985 11547625.5  
 677.945790 136367762.4  
 678.054865 27482765.4  
 678.071362 68274249.5  
 678.196496 40678460.0  
 678.257760 22100285.6  
 678.320804 31551900.7  
 678.444724 38127797.1  
 678.461484 13748390.7  
 678.569144 45229537.7  
 678.693954 47326681.8  
 678.819043 39278509.2  
 678.944755 33658333.9  
 679.031491 33309319.4  
 679.067609 521054386.8  
 679.088456 22697357.7  
 679.109895 32356576.1  
 679.115862 30150081.3  
 679.136317 15111139.4  
 679.156502 75507154.7  
 679.192894 1121813027.0  
 679.233697 30738420.3  
 679.242638 23875919.4  
 679.251840 21604404.3  
 679.261018 21643683.6  
 679.281731 104481654.8  
 679.318004 1551603804.0  
 679.351247 30298244.6

$C_{106}H_{134}N_{33}O_{56}P_{10}S$  677.857433 1.132 -5 c10  
 10

|            |              |
|------------|--------------|
| 679.358896 | 37228438.4   |
| 679.367644 | 30116232.8   |
| 679.377614 | 25943381.7   |
| 679.386449 | 26152981.1   |
| 679.406588 | 116181943.1  |
| 679.443111 | 1665021285.0 |
| 679.477068 | 29503998.8   |
| 679.484400 | 40143350.2   |
| 679.492913 | 28943202.0   |
| 679.502865 | 25981848.1   |
| 679.512120 | 25165927.8   |
| 679.531512 | 101597466.4  |
| 679.568159 | 1454425778.0 |
| 679.590065 | 52408377.6   |
| 679.603188 | 25677605.1   |
| 679.609115 | 35138598.6   |
| 679.621090 | 22555202.2   |
| 679.637228 | 20783647.9   |
| 679.656553 | 76154575.9   |
| 679.693064 | 1065668903.0 |
| 679.716039 | 36186730.5   |
| 679.734039 | 22374825.1   |
| 679.743518 | 15822832.5   |
| 679.754435 | 12409352.5   |
| 679.767175 | 12649881.1   |
| 679.781435 | 49003125.6   |
| 679.792399 | 20871344.3   |
| 679.818020 | 708900705.2  |
| 679.856743 | 13389746.4   |
| 679.906228 | 28847986.7   |
| 679.919178 | 12229698.3   |
| 679.942976 | 408325173.6  |
| 680.031053 | 13233507.7   |
| 680.067943 | 220644153.7  |
| 680.193143 | 123681833.8  |
| 680.317936 | 61615172.0   |
| 680.443133 | 31140700.6   |
| 680.567642 | 13393086.8   |
| 680.695638 | 10529179.8   |
| 681.062511 | 65960806.0   |
| 681.188086 | 148978038.0  |
| 681.277277 | 14089977.3   |
| 681.313049 | 181916727.0  |
| 681.402808 | 16046823.2   |
| 681.438250 | 163797937.3  |
| 681.527091 | 11746415.9   |
| 681.563568 | 159464226.1  |
| 681.655196 | 14862742.7   |
| 681.688237 | 121524792.4  |
| 681.813069 | 79257822.0   |
| 681.938496 | 60774134.5   |
| 682.063365 | 44962694.0   |
| 682.189190 | 30739064.1   |
| 682.315078 | 17995287.0   |
| 682.393571 | 11842820.2   |
| 682.441055 | 13083775.1   |
| 682.562024 | 17503484.3   |
| 682.728178 | 12759628.7   |
| 689.239118 | 16368977.8   |
| 690.434825 | 11744994.7   |

---

|            |             |                                                                                                |            |       |    |                   |
|------------|-------------|------------------------------------------------------------------------------------------------|------------|-------|----|-------------------|
| 690.534668 | 32984040.6  |                                                                                                |            |       |    |                   |
| 690.634684 | 71673669.2  |                                                                                                |            |       |    |                   |
| 690.698291 | 14692772.1  |                                                                                                |            |       |    |                   |
| 690.734291 | 107736935.6 |                                                                                                |            |       |    |                   |
| 690.798875 | 15918413.3  |                                                                                                |            |       |    |                   |
| 690.835456 | 140156056.1 |                                                                                                |            |       |    |                   |
| 690.896913 | 13256806.4  |                                                                                                |            |       |    |                   |
| 690.933217 | 71607449.0  |                                                                                                |            |       |    |                   |
| 691.034986 | 56522436.9  |                                                                                                |            |       |    |                   |
| 691.135091 | 60528765.5  |                                                                                                |            |       |    |                   |
| 691.236486 | 29588016.3  |                                                                                                |            |       |    |                   |
| 691.336755 | 24719777.6  |                                                                                                |            |       |    |                   |
| 691.437744 | 12941558.8  |                                                                                                |            |       |    |                   |
| 691.536513 | 11385122.5  |                                                                                                |            |       |    |                   |
| 692.732939 | 11331566.9  |                                                                                                |            |       |    |                   |
| 693.034607 | 13171241.5  |                                                                                                |            |       |    |                   |
| 693.234360 | 12545221.7  |                                                                                                |            |       |    |                   |
| 727.874134 | 11470268.4  |                                                                                                |            |       |    |                   |
| 728.076194 | 10994359.4  | C <sub>71</sub> H <sub>93</sub> N <sub>16</sub> O <sub>40</sub> P <sub>6</sub> S <sub>6</sub>  | 728.075556 | -     | -3 | b7 - B(dA) + 1H   |
|            |             |                                                                                                |            | 0.876 |    |                   |
| 743.330883 | 20099105.9  | C <sub>96</sub> H <sub>119</sub> N <sub>31</sub> O <sub>48</sub> P <sub>8</sub> S <sub>8</sub> | 743.329984 | -     | -4 | a9 - 2H, b9 - H2O |
|            |             |                                                                                                |            | 1.209 |    |                   |
| 743.581969 | 18751672.4  |                                                                                                |            |       |    |                   |
| 743.831196 | 14154047.8  |                                                                                                |            |       |    |                   |
| 747.403952 | 10525565.7  |                                                                                                |            |       |    |                   |
| 747.571049 | 14093538.6  | C <sub>51</sub> H <sub>61</sub> N <sub>10</sub> O <sub>27</sub> P <sub>4</sub> S <sub>4</sub>  | 747.569771 | -     | -2 | a5 - B(dC) - NH3  |
|            |             |                                                                                                |            | 1.710 |    |                   |
| 747.739094 | 14147142.8  |                                                                                                |            |       |    |                   |
| 751.788679 | 10522301.3  |                                                                                                |            |       |    |                   |
| 752.479474 | 10795332.2  |                                                                                                |            |       |    |                   |
| 752.700694 | 11319363.1  |                                                                                                |            |       |    |                   |
| 754.071483 | 12832265.7  |                                                                                                |            |       |    |                   |
| 754.361293 | 16764074.2  |                                                                                                |            |       |    |                   |
| 754.504564 | 20615324.8  |                                                                                                |            |       |    |                   |
| 756.234557 | 11248140.2  |                                                                                                |            |       |    |                   |
| 765.820788 | 13216401.4  |                                                                                                |            |       |    |                   |
| 765.928777 | 15265388.8  |                                                                                                |            |       |    |                   |
| 766.754813 | 21400666.4  | C <sub>76</sub> H <sub>95</sub> N <sub>21</sub> O <sub>39</sub> P <sub>6</sub> S <sub>6</sub>  | 766.754257 | -     | -3 | a7 - 2H, b7 - H2O |
|            |             |                                                                                                |            | 0.725 |    |                   |
| 767.090072 | 25679505.9  |                                                                                                |            |       |    |                   |
| 767.328480 | 10870517.4  |                                                                                                |            |       |    |                   |
| 767.374060 | 95589773.4  |                                                                                                |            |       |    |                   |
| 767.421659 | 22242280.7  |                                                                                                |            |       |    |                   |
| 767.441890 | 20584379.3  |                                                                                                |            |       |    |                   |
| 767.485528 | 170532977.5 |                                                                                                |            |       |    |                   |
| 767.553228 | 16827398.5  |                                                                                                |            |       |    |                   |
| 767.595889 | 203220826.8 |                                                                                                |            |       |    |                   |
| 767.661685 | 21401555.9  |                                                                                                |            |       |    |                   |
| 767.706556 | 194829219.4 |                                                                                                |            |       |    |                   |
| 767.760032 | 12644328.9  |                                                                                                |            |       |    |                   |
| 767.771620 | 12862505.9  |                                                                                                |            |       |    |                   |
| 767.817120 | 119023306.8 |                                                                                                |            |       |    |                   |
| 767.880746 | 11726289.3  |                                                                                                |            |       |    |                   |
| 767.927148 | 72998483.9  |                                                                                                |            |       |    |                   |
| 767.993652 | 16624008.9  |                                                                                                |            |       |    |                   |
| 768.041224 | 127453290.2 |                                                                                                |            |       |    |                   |
| 768.154166 | 65256243.5  |                                                                                                |            |       |    |                   |
| 768.264819 | 57959751.5  |                                                                                                |            |       |    |                   |
| 768.375062 | 58846487.3  |                                                                                                |            |       |    |                   |
| 768.482947 | 14854398.6  |                                                                                                |            |       |    |                   |

|            |             |                                                                                                   |            |       |    |                     |
|------------|-------------|---------------------------------------------------------------------------------------------------|------------|-------|----|---------------------|
| 769.927028 | 22566059.5  |                                                                                                   |            |       |    |                     |
| 770.039040 | 55332377.4  |                                                                                                   |            |       |    |                     |
| 770.151122 | 27761336.5  |                                                                                                   |            |       |    |                     |
| 770.260115 | 27381435.4  |                                                                                                   |            |       |    |                     |
| 770.371894 | 23922016.1  |                                                                                                   |            |       |    |                     |
| 770.481477 | 11952994.3  |                                                                                                   |            |       |    |                     |
| 770.705026 | 12655137.3  |                                                                                                   |            |       |    |                     |
| 770.943865 | 11937421.5  |                                                                                                   |            |       |    |                     |
| 771.085485 | 14104429.4  |                                                                                                   |            |       |    |                     |
| 771.811723 | 11100856.5  |                                                                                                   |            |       |    |                     |
| 772.937302 | 19553552.6  |                                                                                                   |            |       |    |                     |
| 773.081377 | 83841335.2  |                                                                                                   |            |       |    |                     |
| 773.179428 | 23110321.9  |                                                                                                   |            |       |    |                     |
| 773.221892 | 114279276.9 |                                                                                                   |            |       |    |                     |
| 773.319835 | 37879631.6  | C <sub>96</sub> H <sub>120</sub> N <sub>35</sub> O <sub>48</sub> P <sub>9</sub> S <sub>9</sub>    | 773.321472 | 2.117 | -4 | w9 - H2O            |
| 773.365251 | 208624448.9 |                                                                                                   |            |       |    |                     |
| 773.461746 | 46286790.2  |                                                                                                   |            |       |    |                     |
| 773.508565 | 200306047.2 |                                                                                                   |            |       |    |                     |
| 773.609642 | 23828721.6  |                                                                                                   |            |       |    |                     |
| 773.654269 | 327312237.0 |                                                                                                   |            |       |    |                     |
| 773.686418 | 11190123.8  |                                                                                                   |            |       |    |                     |
| 773.751538 | 14201239.8  |                                                                                                   |            |       |    |                     |
| 773.795456 | 144616478.8 |                                                                                                   |            |       |    |                     |
| 773.939885 | 116487333.7 |                                                                                                   |            |       |    |                     |
| 774.080739 | 82800964.4  |                                                                                                   |            |       |    |                     |
| 774.223956 | 53876855.3  |                                                                                                   |            |       |    |                     |
| 774.366453 | 25057397.1  |                                                                                                   |            |       |    |                     |
| 774.510048 | 13631332.2  |                                                                                                   |            |       |    |                     |
| 776.221913 | 23871472.9  |                                                                                                   |            |       |    |                     |
| 776.363803 | 16221016.4  |                                                                                                   |            |       |    |                     |
| 776.508195 | 34803242.1  |                                                                                                   |            |       |    |                     |
| 776.651119 | 36390154.6  |                                                                                                   |            |       |    |                     |
| 776.793857 | 39831187.2  |                                                                                                   |            |       |    |                     |
| 776.935706 | 28614738.2  |                                                                                                   |            |       |    |                     |
| 777.079887 | 31446013.1  |                                                                                                   |            |       |    |                     |
| 777.222317 | 25395824.3  |                                                                                                   |            |       |    |                     |
| 777.364834 | 15172564.6  |                                                                                                   |            |       |    |                     |
| 778.644374 | 20145643.4  |                                                                                                   |            |       |    |                     |
| 778.788685 | 20256346.5  |                                                                                                   |            |       |    |                     |
| 778.931123 | 13069299.8  |                                                                                                   |            |       |    |                     |
| 779.074677 | 21318611.6  |                                                                                                   |            |       |    |                     |
| 779.217346 | 13510469.8  |                                                                                                   |            |       |    |                     |
| 779.361339 | 15122213.5  |                                                                                                   |            |       |    |                     |
| 779.501722 | 11942639.0  |                                                                                                   |            |       |    |                     |
| 779.788329 | 11122074.5  |                                                                                                   |            |       |    |                     |
| 791.478732 | 31005382.4  | C <sub>126</sub> H <sub>157</sub> N <sub>40</sub> O <sub>65</sub> P <sub>11</sub> S <sub>11</sub> | 791.477745 | -     | -5 | a12 - 2H, b12 - H2O |
|            |             |                                                                                                   |            | 1.247 |    |                     |
| 791.679388 | 39306896.2  |                                                                                                   |            |       |    |                     |
| 791.879582 | 41998413.0  | C <sub>126</sub> H <sub>159</sub> N <sub>40</sub> O <sub>65</sub> P <sub>11</sub> S <sub>11</sub> | 791.880875 | 1.633 | -5 | a12                 |
|            |             |                                                                                                   |            |       |    |                     |
| 792.080093 | 31520186.4  |                                                                                                   |            |       |    |                     |
| 792.280796 | 17177177.6  |                                                                                                   |            |       |    |                     |
| 809.246303 | 16644133.9  |                                                                                                   |            |       |    |                     |
| 809.412342 | 23216125.3  |                                                                                                   |            |       |    |                     |
| 809.579503 | 19044517.5  |                                                                                                   |            |       |    |                     |
| 809.746416 | 16467742.3  |                                                                                                   |            |       |    |                     |
| 812.747574 | 12870647.3  | C <sub>76</sub> H <sub>98</sub> N <sub>25</sub> O <sub>40</sub> P <sub>7</sub> S <sub>7</sub>     | 812.746430 | -     | -3 | w7                  |
|            |             |                                                                                                   |            | 1.408 |    |                     |
| 818.107316 | 16011662.3  | C <sub>56</sub> H <sub>70</sub> N <sub>14</sub> O <sub>28</sub> P <sub>4</sub> S <sub>4</sub>     | 818.108589 | 1.556 | -2 | a5 - 2H, b5 - H2O   |
| 819.275073 | 52596087.8  | C <sub>130</sub> H <sub>165</sub> N <sub>38</sub> O <sub>68</sub> P <sub>12</sub> S               | 819.275150 | 0.094 | -5 | a13 - B(G) -        |



|            |             |                                                                                                      |            |       |    |                  |
|------------|-------------|------------------------------------------------------------------------------------------------------|------------|-------|----|------------------|
| 819.475355 | 64369570.3  | <sup>12</sup><br>C <sub>126</sub> H <sub>162</sub> N <sub>44</sub> O <sub>66</sub> P <sub>12</sub> S | 819.476178 | 1.004 | -5 | OCH2<br>w12 + 2H |
| 819.675503 | 47806977.1  | <sup>12</sup>                                                                                        |            |       |    |                  |
| 819.876282 | 17703045.9  |                                                                                                      |            |       |    |                  |
| 823.837336 | 13942329.4  |                                                                                                      |            |       |    |                  |
| 840.345743 | 11777147.7  | C <sub>106</sub> H <sub>134</sub> N <sub>40</sub> O <sub>52</sub> P <sub>9</sub> S <sub>9</sub>      | 840.347617 | 2.230 | -4 | y10 + 1H         |
| 846.915599 | 12597742.3  |                                                                                                      |            |       |    |                  |
| 847.039170 | 15354322.8  |                                                                                                      |            |       |    |                  |
| 860.488881 | 69397072.9  |                                                                                                      |            |       |    |                  |
| 860.689231 | 81249951.9  | C <sub>136</sub> H <sub>172</sub> N <sub>46</sub> O <sub>69</sub> P <sub>12</sub> S                  | 860.690007 | 0.902 | -5 | z13              |
| 861.090208 | 34738544.0  | <sup>12</sup>                                                                                        |            |       |    |                  |
| 861.290736 | 14139747.8  |                                                                                                      |            |       |    |                  |
| 861.549009 | 14333955.6  |                                                                                                      |            |       |    |                  |
| 861.670962 | 11743795.8  |                                                                                                      |            |       |    |                  |
| 861.798485 | 12390528.4  |                                                                                                      |            |       |    |                  |
| 861.923809 | 13691754.1  |                                                                                                      |            |       |    |                  |
| 862.047268 | 15417829.2  |                                                                                                      |            |       |    |                  |
| 862.173728 | 18705763.6  |                                                                                                      |            |       |    |                  |
| 863.295052 | 48621105.1  |                                                                                                      |            |       |    |                  |
| 863.422678 | 67101568.7  |                                                                                                      |            |       |    |                  |
| 863.546842 | 149716915.4 |                                                                                                      |            |       |    |                  |
| 863.613880 | 17506733.7  |                                                                                                      |            |       |    |                  |
| 863.671945 | 198630692.7 |                                                                                                      |            |       |    |                  |
| 863.738329 | 26302576.3  |                                                                                                      |            |       |    |                  |
| 863.796472 | 160819029.4 |                                                                                                      |            |       |    |                  |
| 863.863499 | 19471556.7  |                                                                                                      |            |       |    |                  |
| 863.920402 | 98944582.4  |                                                                                                      |            |       |    |                  |
| 863.988252 | 19054082.2  |                                                                                                      |            |       |    |                  |
| 864.046350 | 133101730.6 |                                                                                                      |            |       |    |                  |
| 864.113713 | 15242110.1  |                                                                                                      |            |       |    |                  |
| 864.171555 | 123970255.3 |                                                                                                      |            |       |    |                  |
| 864.297026 | 84985989.4  |                                                                                                      |            |       |    |                  |
| 864.423167 | 51105170.6  |                                                                                                      |            |       |    |                  |
| 864.545709 | 16347984.5  |                                                                                                      |            |       |    |                  |
| 864.796836 | 11574765.8  |                                                                                                      |            |       |    |                  |
| 866.170126 | 11205622.0  |                                                                                                      |            |       |    |                  |
| 866.293670 | 13299150.7  |                                                                                                      |            |       |    |                  |
| 866.419250 | 36824019.5  |                                                                                                      |            |       |    |                  |
| 866.542522 | 19828941.7  |                                                                                                      |            |       |    |                  |
| 866.667197 | 29689839.7  |                                                                                                      |            |       |    |                  |
| 866.794667 | 21501471.5  |                                                                                                      |            |       |    |                  |
| 866.919828 | 14627965.8  |                                                                                                      |            |       |    |                  |
| 867.044321 | 22128299.6  |                                                                                                      |            |       |    |                  |
| 868.164424 | 11102665.6  |                                                                                                      |            |       |    |                  |
| 876.751483 | 17414368.2  |                                                                                                      |            |       |    |                  |
| 876.919118 | 23027610.7  |                                                                                                      |            |       |    |                  |
| 877.085663 | 21365685.1  |                                                                                                      |            |       |    |                  |
| 877.252823 | 21270245.0  |                                                                                                      |            |       |    |                  |
| 877.419610 | 13403425.6  |                                                                                                      |            |       |    |                  |
| 879.585372 | 13079132.7  | C <sub>55</sub> H <sub>70</sub> N <sub>18</sub> O <sub>29</sub> P <sub>5</sub> S <sub>5</sub>        | 879.585111 | -     | -2 | w5 - CH3         |
|            |             |                                                                                                      |            | 0.297 |    |                  |
| 879.751081 | 14340136.5  |                                                                                                      |            |       |    |                  |
| 880.254453 | 12233948.4  |                                                                                                      |            |       |    |                  |
| 881.250354 | 12827221.0  |                                                                                                      |            |       |    |                  |
| 881.419977 | 15443818.8  |                                                                                                      |            |       |    |                  |
| 881.761280 | 22197794.6  |                                                                                                      |            |       |    |                  |
| 882.099530 | 24182612.9  |                                                                                                      |            |       |    |                  |
| 882.434797 | 10603844.1  | C <sub>86</sub> H <sub>109</sub> N <sub>26</sub> O <sub>44</sub> P <sub>7</sub> S <sub>7</sub>       | 882.436033 | 1.401 | -3 | a8               |

|            |             |                                          |            |        |    |                  |  |
|------------|-------------|------------------------------------------|------------|--------|----|------------------|--|
| 884.775025 | 18390093.1  |                                          |            |        |    |                  |  |
| 885.106853 | 15700664.7  |                                          |            |        |    |                  |  |
| 887.097234 | 18021759.8  | $C_{56}H_{73}N_{18}O_{29}P_5S_5$         | 887.096848 | -0.435 | -2 | w5               |  |
| 899.597965 | 13288820.7  |                                          |            |        |    |                  |  |
| 899.765799 | 15149942.2  |                                          |            |        |    |                  |  |
| 901.695091 | 11478893.7  |                                          |            |        |    |                  |  |
| 901.759553 | 122778873.3 |                                          |            |        |    |                  |  |
| 901.862887 | 24223042.1  |                                          |            |        |    |                  |  |
| 901.898376 | 12002471.4  |                                          |            |        |    |                  |  |
| 901.926704 | 303927230.3 |                                          |            |        |    |                  |  |
| 901.958898 | 13331222.1  |                                          |            |        |    |                  |  |
| 902.029647 | 37200899.8  |                                          |            |        |    |                  |  |
| 902.093255 | 400320716.2 | $C_{61}H_{77}N_{11}O_{33}P_5S_5$         | 902.091568 | -1.870 | -2 | a6 - B(dA) - H2O |  |
| 902.124231 | 19917386.3  |                                          |            |        |    |                  |  |
| 902.196690 | 44944276.3  |                                          |            |        |    |                  |  |
| 902.260192 | 376572874.8 |                                          |            |        |    |                  |  |
| 902.306329 | 11322104.3  |                                          |            |        |    |                  |  |
| 902.362648 | 48543755.7  |                                          |            |        |    |                  |  |
| 902.427629 | 397904510.0 |                                          |            |        |    |                  |  |
| 902.471546 | 12349761.9  |                                          |            |        |    |                  |  |
| 902.529871 | 22798121.4  |                                          |            |        |    |                  |  |
| 902.699833 | 16372616.5  |                                          |            |        |    |                  |  |
| 902.762951 | 232565056.8 |                                          |            |        |    |                  |  |
| 902.868574 | 15362958.7  |                                          |            |        |    |                  |  |
| 902.927711 | 100337238.1 |                                          |            |        |    |                  |  |
| 903.093095 | 74022499.9  |                                          |            |        |    |                  |  |
| 903.261488 | 48022782.5  |                                          |            |        |    |                  |  |
| 903.430430 | 32397493.9  |                                          |            |        |    |                  |  |
| 903.595352 | 17466982.6  |                                          |            |        |    |                  |  |
| 903.763802 | 17404714.2  |                                          |            |        |    |                  |  |
| 905.422936 | 10755858.9  |                                          |            |        |    |                  |  |
| 905.590564 | 25794471.1  |                                          |            |        |    |                  |  |
| 905.757559 | 32705607.4  |                                          |            |        |    |                  |  |
| 905.923863 | 32808430.6  |                                          |            |        |    |                  |  |
| 906.258433 | 36141482.7  |                                          |            |        |    |                  |  |
| 906.424145 | 24764250.2  |                                          |            |        |    |                  |  |
| 906.592660 | 24523279.4  | $C_{115}H_{144}N_{38}O_{59}P_{10}S_{10}$ | 906.593201 | 0.597  | -4 | b11 - OCH2       |  |
| 906.756599 | 12987119.9  |                                          |            |        |    |                  |  |
| 908.420432 | 13396279.1  |                                          |            |        |    |                  |  |
| 908.586620 | 14270513.7  |                                          |            |        |    |                  |  |
| 908.751229 | 15828301.7  |                                          |            |        |    |                  |  |
| 908.921424 | 16875758.2  |                                          |            |        |    |                  |  |
| 909.088063 | 11416212.5  | $C_{116}H_{142}N_{38}O_{59}P_{10}S_{10}$ | 909.089289 | 1.349  | -4 | a11 - 4H         |  |
| 922.426338 | 14966400.4  | $C_{86}H_{110}N_{30}O_{44}P_8S_8$        | 922.424684 | -1.793 | -3 | w8               |  |
| 958.472703 | 10977358.2  |                                          |            |        |    |                  |  |
| 985.197706 | 12217350.2  |                                          |            |        |    |                  |  |
| 985.343104 | 12316712.4  |                                          |            |        |    |                  |  |
| 986.764560 | 14788277.2  |                                          |            |        |    |                  |  |
| 986.910194 | 70640366.5  |                                          |            |        |    |                  |  |
| 987.054373 | 95871928.5  |                                          |            |        |    |                  |  |
| 987.197583 | 89834473.2  |                                          |            |        |    |                  |  |
| 987.265537 | 10929505.4  |                                          |            |        |    |                  |  |
| 987.339235 | 63632860.1  |                                          |            |        |    |                  |  |
| 987.482081 | 53574058.1  |                                          |            |        |    |                  |  |
| 987.625826 | 56153590.8  |                                          |            |        |    |                  |  |

|            |            |                                     |            |       |    |                               |
|------------|------------|-------------------------------------|------------|-------|----|-------------------------------|
| 987.766926 | 33654666.8 |                                     |            |       |    |                               |
| 987.909402 | 28935358.3 |                                     |            |       |    |                               |
| 988.051253 | 17882166.5 |                                     |            |       |    |                               |
| 988.197215 | 14403989.7 |                                     |            |       |    |                               |
| 990.196256 | 12650624.9 |                                     |            |       |    |                               |
| 990.333454 | 11899469.8 |                                     |            |       |    |                               |
| 990.481376 | 27181195.8 |                                     |            |       |    |                               |
| 990.623133 | 18573180.6 |                                     |            |       |    |                               |
| 990.767010 | 10900212.2 |                                     |            |       |    |                               |
| 1082.71481 | 30309872.0 | $C_{172}H_{217}N_{56}O_{88}P_{15}S$ | 1082.71475 | -     | -5 | M - 5H                        |
| 6          |            | 15                                  | 6          | 0.055 |    |                               |
| 1082.91480 | 29851596.4 |                                     |            |       |    |                               |
| 6          |            |                                     |            |       |    |                               |
| 1083.11400 | 73156029.5 |                                     |            |       |    |                               |
| 2          |            |                                     |            |       |    |                               |
| 1083.31189 | 57383994.4 |                                     |            |       |    |                               |
| 9          |            |                                     |            |       |    |                               |
| 1083.51598 | 47861205.6 |                                     |            |       |    |                               |
| 0          |            |                                     |            |       |    |                               |
| 1083.71480 | 31053941.0 |                                     |            |       |    |                               |
| 4          |            |                                     |            |       |    |                               |
| 1083.91663 | 30976967.3 |                                     |            |       |    |                               |
| 1          |            |                                     |            |       |    |                               |
| 1084.11454 | 20420216.0 | $C_{71}H_{92}N_{16}O_{39}P_6S_6$    | 1084.11560 | 0.979 | -2 | b7 - B(G), a7 -<br>B(dA) + 1H |
| 1          |            |                                     | 2          |       |    |                               |
| 1084.31146 | 13569367.1 |                                     |            |       |    |                               |
| 7          |            |                                     |            |       |    |                               |
| 1084.51742 | 13212094.5 |                                     |            |       |    |                               |
| 9          |            |                                     |            |       |    |                               |
| 1087.31027 | 16784253.0 |                                     |            |       |    |                               |
| 4          |            |                                     |            |       |    |                               |
| 1087.50901 | 11913049.3 |                                     |            |       |    |                               |
| 1          |            |                                     |            |       |    |                               |
| 1087.71136 | 12913778.6 |                                     |            |       |    |                               |
| 5          |            |                                     |            |       |    |                               |
| 1087.90910 | 12245671.9 |                                     |            |       |    |                               |
| 1          |            |                                     |            |       |    |                               |
| 1088.11240 | 23228179.9 |                                     |            |       |    |                               |
| 8          |            |                                     |            |       |    |                               |
| 1136.13382 | 10712712.6 |                                     |            |       |    |                               |
| 3          |            |                                     |            |       |    |                               |
| 1151.39408 | 12282233.0 |                                     |            |       |    |                               |
| 8          |            |                                     |            |       |    |                               |
| 1151.55945 | 14788016.2 |                                     |            |       |    |                               |
| 9          |            |                                     |            |       |    |                               |
| 1151.72944 | 22131812.5 |                                     |            |       |    |                               |
| 8          |            |                                     |            |       |    |                               |
| 1151.89597 | 45249656.7 |                                     |            |       |    |                               |
| 2          |            |                                     |            |       |    |                               |
| 1152.06142 | 39570943.3 |                                     |            |       |    |                               |
| 0          |            |                                     |            |       |    |                               |
| 1152.22705 | 41326302.8 |                                     |            |       |    |                               |
| 9          |            |                                     |            |       |    |                               |
| 1152.39537 | 19584780.9 |                                     |            |       |    |                               |
| 9          |            |                                     |            |       |    |                               |
| 1152.56279 | 27995687.2 |                                     |            |       |    |                               |
| 1          |            |                                     |            |       |    |                               |
| 1152.72959 | 15200096.2 |                                     |            |       |    |                               |
| 8          |            |                                     |            |       |    |                               |
| 1155.72491 | 16103813.3 |                                     |            |       |    |                               |

1  
 1155.89114 14244689.0  
 7  
 1156.05951 11956896.0  
 6  
 1353.63948 10985717.6  
 5  
 1353.88871 25053416.2  
 3  
 1354.13887 17623126.5  
 8  
 1354.38815 20485819.9  
 3  
 1354.63878 18375871.6  
 1  
 1354.89130 25336053.4  
 6  
 1355.13874 12319478.2  
 5  
 1359.63527 17646862.6  
 7  
 1359.88404 13157710.4  
 7  
 1360.13300 12078421.2  
 1  
 1382.87431 12593353.7  
 3  
 1383.07090 16593731.3  
 1  
 1861.93930 19587310.2  
 5

|          |       |
|----------|-------|
| Abs mean | 1.137 |
| error    |       |
| Abs mean | 0.583 |
| std dev  |       |

---

**Table S18 showing peak list, intensity, elemental composition, and possible assignments with mass errors (ppm) of danvatirsen using 2D-UVPD-MS of eight scans accumulated denoised (same rank 10) [M-7H]<sup>7-</sup> precursor ion (note, noise peaks were included to highlight the effect of denoising).**

| Measured<br><i>mz</i> | Intensity   | Elemental<br>Composition | Theoretical<br><i>mz</i> | Error<br>(ppm<br>) | Charge | Assignment |
|-----------------------|-------------|--------------------------|--------------------------|--------------------|--------|------------|
| 257.838424            | 20418300.2  |                          |                          |                    |        |            |
| 257.885993            | 18954883.9  |                          |                          |                    |        |            |
| 338.345496            | 19843117.6  |                          |                          |                    |        |            |
| 383.906832            | 17600333.8  |                          |                          |                    |        |            |
| 383.962441            | 23400248.7  |                          |                          |                    |        |            |
| 386.539385            | 46162125.0  |                          |                          |                    |        |            |
| 386.599523            | 22250355.7  |                          |                          |                    |        |            |
| 386.610572            | 81275075.9  |                          |                          |                    |        |            |
| 386.671224            | 33975331.3  |                          |                          |                    |        |            |
| 386.682332            | 152304949.3 |                          |                          |                    |        |            |
| 386.694558            | 17824673.3  |                          |                          |                    |        |            |
| 386.742680            | 40383695.2  |                          |                          |                    |        |            |
| 386.753884            | 222242482.6 |                          |                          |                    |        |            |
| 386.766051            | 26371694.0  |                          |                          |                    |        |            |
| 386.814040            | 40791443.1  |                          |                          |                    |        |            |
| 386.825362            | 182379635.2 |                          |                          |                    |        |            |
| 386.837682            | 19728741.3  |                          |                          |                    |        |            |
| 386.885086            | 22547274.7  |                          |                          |                    |        |            |
| 386.896645            | 112698181.3 |                          |                          |                    |        |            |
| 386.968167            | 43485391.9  |                          |                          |                    |        |            |
| 387.039690            | 65234864.7  |                          |                          |                    |        |            |
| 387.111155            | 66467387.3  |                          |                          |                    |        |            |
| 387.182570            | 43044557.6  |                          |                          |                    |        |            |
| 387.254056            | 19100942.7  |                          |                          |                    |        |            |
| 388.180853            | 23779861.4  |                          |                          |                    |        |            |
| 388.323988            | 26649484.9  |                          |                          |                    |        |            |
| 388.395359            | 32599042.5  |                          |                          |                    |        |            |
| 388.466915            | 22129958.6  |                          |                          |                    |        |            |
| 601.061295            | 31577605.1  |                          |                          |                    |        |            |
| 601.172952            | 114693357.9 |                          |                          |                    |        |            |
| 601.285123            | 83567964.7  |                          |                          |                    |        |            |
| 601.395328            | 145168596.6 |                          |                          |                    |        |            |
| 601.507292            | 79735865.3  |                          |                          |                    |        |            |
| 601.617696            | 25533326.8  |                          |                          |                    |        |            |
| 601.728672            | 47559978.1  |                          |                          |                    |        |            |
| 601.840651            | 43133191.5  |                          |                          |                    |        |            |
| 603.837275            | 16066612.9  |                          |                          |                    |        |            |
| 604.059850            | 20520937.3  |                          |                          |                    |        |            |
| 627.758825            | 22279152.6  |                          |                          |                    |        |            |
| 627.850963            | 24471178.4  |                          |                          |                    |        |            |
| 627.941962            | 17386690.8  |                          |                          |                    |        |            |
| 628.122600            | 20869765.0  |                          |                          |                    |        |            |
| 674.697369            | 17550213.6  |                          |                          |                    |        |            |
| 674.823429            | 17912579.6  |                          |                          |                    |        |            |
| 676.321314            | 79012197.0  |                          |                          |                    |        |            |
| 676.410989            | 35410569.1  |                          |                          |                    |        |            |
| 676.445753            | 92452409.2  |                          |                          |                    |        |            |
| 676.535907            | 49281608.9  |                          |                          |                    |        |            |
| 676.572636            | 147917752.5 |                          |                          |                    |        |            |
| 676.660289            | 51212116.8  |                          |                          |                    |        |            |
| 676.695032            | 213841477.9 |                          |                          |                    |        |            |
| 676.785779            | 40760860.4  |                          |                          |                    |        |            |

|            |              |
|------------|--------------|
| 676.821787 | 287855330.4  |
| 676.912797 | 21624964.5   |
| 676.945880 | 170107020.9  |
| 677.036868 | 19217923.2   |
| 677.071898 | 132467033.7  |
| 677.197315 | 59124758.5   |
| 677.319022 | 48462359.2   |
| 677.447704 | 37223692.8   |
| 677.572394 | 21789816.6   |
| 679.193883 | 28785367.4   |
| 679.318553 | 29384829.4   |
| 679.444238 | 29091965.1   |
| 679.569597 | 18810489.1   |
| 679.693585 | 31768745.0   |
| 679.819332 | 29049859.7   |
| 681.189870 | 16791443.8   |
| 681.313407 | 22896832.8   |
| 681.688943 | 19386241.3   |
| 681.938815 | 18842291.8   |
| 690.535961 | 43624701.0   |
| 690.636556 | 83275014.2   |
| 690.699427 | 21430985.5   |
| 690.736041 | 75731415.5   |
| 690.799510 | 17070488.5   |
| 690.836818 | 73494187.1   |
| 690.937792 | 89589300.8   |
| 691.037592 | 76356158.9   |
| 691.137367 | 47377160.7   |
| 691.235957 | 30343871.0   |
| 751.788701 | 17129400.1   |
| 752.590809 | 15950605.1   |
| 753.788413 | 54524397.9   |
| 753.931944 | 126047911.4  |
| 754.074721 | 165751402.2  |
| 754.217835 | 132704510.1  |
| 754.361130 | 71340888.0   |
| 754.504178 | 38134998.5   |
| 754.646501 | 30718001.5   |
| 754.789436 | 15828765.5   |
| 765.708789 | 22267989.4   |
| 765.821042 | 16547398.0   |
| 765.934030 | 23303124.7   |
| 767.217714 | 20525266.4   |
| 767.258496 | 99362653.6   |
| 767.327912 | 52466042.6   |
| 767.371602 | 357468581.6  |
| 767.397075 | 18152165.3   |
| 767.419807 | 24598081.7   |
| 767.439221 | 80232210.7   |
| 767.483055 | 749962300.4  |
| 767.508962 | 32131968.1   |
| 767.528633 | 38839398.8   |
| 767.549520 | 85380607.1   |
| 767.594361 | 1080569177.0 |
| 767.637124 | 49646696.2   |
| 767.660665 | 106296754.2  |
| 767.705341 | 1082796598.0 |
| 767.747291 | 52776343.2   |
| 767.771345 | 90095053.4   |
| 767.816579 | 960070601.5  |

---

|            |             |                                                                                               |            |       |    |                |
|------------|-------------|-----------------------------------------------------------------------------------------------|------------|-------|----|----------------|
| 767.856742 | 44495703.9  |                                                                                               |            |       |    |                |
| 767.883971 | 88660842.0  |                                                                                               |            |       |    |                |
| 767.927772 | 788764229.5 |                                                                                               |            |       |    |                |
| 767.966171 | 34527683.9  |                                                                                               |            |       |    |                |
| 767.995776 | 64621649.5  |                                                                                               |            |       |    |                |
| 768.039155 | 566678711.3 |                                                                                               |            |       |    |                |
| 768.076524 | 32487673.9  |                                                                                               |            |       |    |                |
| 768.150080 | 382110409.4 |                                                                                               |            |       |    |                |
| 768.186855 | 21528595.2  |                                                                                               |            |       |    |                |
| 768.220888 | 28612327.1  |                                                                                               |            |       |    |                |
| 768.261914 | 259293766.0 |                                                                                               |            |       |    |                |
| 768.298431 | 15835215.3  |                                                                                               |            |       |    |                |
| 768.322467 | 16705306.3  |                                                                                               |            |       |    |                |
| 768.331194 | 18402795.4  |                                                                                               |            |       |    |                |
| 768.372608 | 149889959.2 |                                                                                               |            |       |    |                |
| 768.484979 | 114175904.3 |                                                                                               |            |       |    |                |
| 768.708263 | 40484169.8  |                                                                                               |            |       |    |                |
| 768.797340 | 19704965.9  |                                                                                               |            |       |    |                |
| 768.819419 | 20489727.1  |                                                                                               |            |       |    |                |
| 768.940096 | 20750725.8  |                                                                                               |            |       |    |                |
| 769.703627 | 50393228.5  |                                                                                               |            |       |    |                |
| 769.815310 | 153630613.5 |                                                                                               |            |       |    |                |
| 769.879990 | 22789302.8  |                                                                                               |            |       |    |                |
| 769.926686 | 282690849.4 |                                                                                               |            |       |    |                |
| 769.950099 | 15827633.2  |                                                                                               |            |       |    |                |
| 769.992229 | 30032759.7  |                                                                                               |            |       |    |                |
| 770.017016 | 16821452.4  |                                                                                               |            |       |    |                |
| 770.037968 | 424580442.4 |                                                                                               |            |       |    |                |
| 770.059563 | 26214864.7  | C <sub>71</sub> H <sub>90</sub> N <sub>23</sub> O <sub>38</sub> P <sub>7</sub> S <sub>7</sub> | 770.060238 | 0.877 | -3 | w7 - B(T) - 2H |
| 770.103788 | 33385802.1  |                                                                                               |            |       |    |                |
| 770.149176 | 440233127.6 |                                                                                               |            |       |    |                |
| 770.180263 | 16591603.4  |                                                                                               |            |       |    |                |
| 770.193013 | 16600459.8  |                                                                                               |            |       |    |                |
| 770.214809 | 29256824.8  |                                                                                               |            |       |    |                |
| 770.260575 | 426549810.8 |                                                                                               |            |       |    |                |
| 770.283284 | 22457631.3  |                                                                                               |            |       |    |                |
| 770.325708 | 24689915.3  |                                                                                               |            |       |    |                |
| 770.349309 | 17876809.8  |                                                                                               |            |       |    |                |
| 770.371681 | 408008645.0 |                                                                                               |            |       |    |                |
| 770.393095 | 24202076.2  |                                                                                               |            |       |    |                |
| 770.405740 | 17169564.7  |                                                                                               |            |       |    |                |
| 770.430634 | 19527805.9  |                                                                                               |            |       |    |                |
| 770.482989 | 303684770.0 |                                                                                               |            |       |    |                |
| 770.594096 | 224630913.7 |                                                                                               |            |       |    |                |
| 770.705359 | 156802280.2 |                                                                                               |            |       |    |                |
| 770.813931 | 78921762.7  |                                                                                               |            |       |    |                |
| 770.924730 | 55692369.1  |                                                                                               |            |       |    |                |
| 770.942873 | 130269623.9 |                                                                                               |            |       |    |                |
| 771.036929 | 38313377.2  |                                                                                               |            |       |    |                |
| 771.084510 | 196398584.4 |                                                                                               |            |       |    |                |
| 771.149822 | 15950313.8  |                                                                                               |            |       |    |                |
| 771.182905 | 19341915.4  |                                                                                               |            |       |    |                |
| 771.227435 | 227707500.9 |                                                                                               |            |       |    |                |
| 771.264195 | 17749815.7  |                                                                                               |            |       |    |                |
| 771.328237 | 18258530.5  |                                                                                               |            |       |    |                |
| 771.370525 | 254576192.6 |                                                                                               |            |       |    |                |
| 771.472611 | 22613322.5  |                                                                                               |            |       |    |                |
| 771.513531 | 222571391.2 |                                                                                               |            |       |    |                |
| 771.589656 | 77628791.4  |                                                                                               |            |       |    |                |
| 771.656074 | 159582165.0 |                                                                                               |            |       |    |                |

|            |               |                                                                                                |            |       |    |         |
|------------|---------------|------------------------------------------------------------------------------------------------|------------|-------|----|---------|
| 771.700673 | 147330760.2   |                                                                                                |            |       |    |         |
| 771.744728 | 20805394.8    |                                                                                                |            |       |    |         |
| 771.755524 | 21301228.7    |                                                                                                |            |       |    |         |
| 771.797329 | 104568613.1   |                                                                                                |            |       |    |         |
| 771.813374 | 192461369.1   |                                                                                                |            |       |    |         |
| 771.840420 | 17538519.3    |                                                                                                |            |       |    |         |
| 771.870804 | 21912765.8    |                                                                                                |            |       |    |         |
| 771.890060 | 17735157.1    |                                                                                                |            |       |    |         |
| 771.923109 | 230840423.3   |                                                                                                |            |       |    |         |
| 771.968257 | 17359032.3    |                                                                                                |            |       |    |         |
| 771.984785 | 23816533.4    |                                                                                                |            |       |    |         |
| 772.005905 | 17634835.2    |                                                                                                |            |       |    |         |
| 772.033960 | 236975603.9   |                                                                                                |            |       |    |         |
| 772.083538 | 73170961.9    |                                                                                                |            |       |    |         |
| 772.116412 | 16504288.6    |                                                                                                |            |       |    |         |
| 772.145104 | 213382488.2   |                                                                                                |            |       |    |         |
| 772.213344 | 26041772.9    |                                                                                                |            |       |    |         |
| 772.257137 | 171946766.4   |                                                                                                |            |       |    |         |
| 772.323129 | 24292717.9    | C <sub>96</sub> H <sub>124</sub> N <sub>31</sub> O <sub>51</sub> P <sub>9</sub> S <sub>9</sub> | 772.322409 | -     | -4 | d9 + 2H |
|            |               |                                                                                                |            | 0.932 |    |         |
| 772.368214 | 181968522.5   |                                                                                                |            |       |    |         |
| 772.416628 | 26187707.5    |                                                                                                |            |       |    |         |
| 772.436881 | 17349309.3    |                                                                                                |            |       |    |         |
| 772.479647 | 138475133.4   |                                                                                                |            |       |    |         |
| 772.548597 | 15881323.5    |                                                                                                |            |       |    |         |
| 772.592172 | 106110657.3   |                                                                                                |            |       |    |         |
| 772.662820 | 17524560.8    |                                                                                                |            |       |    |         |
| 772.675378 | 15893467.3    |                                                                                                |            |       |    |         |
| 772.703535 | 81782795.1    |                                                                                                |            |       |    |         |
| 772.721707 | 20686678.6    |                                                                                                |            |       |    |         |
| 772.733195 | 19000890.0    |                                                                                                |            |       |    |         |
| 772.761746 | 37202500.8    |                                                                                                |            |       |    |         |
| 772.780108 | 21233263.9    |                                                                                                |            |       |    |         |
| 772.816531 | 67114025.9    |                                                                                                |            |       |    |         |
| 772.837050 | 24173604.4    |                                                                                                |            |       |    |         |
| 772.849679 | 24036362.1    |                                                                                                |            |       |    |         |
| 772.860888 | 24061408.5    |                                                                                                |            |       |    |         |
| 772.886943 | 24686811.9    |                                                                                                |            |       |    |         |
| 772.913185 | 33035282.6    |                                                                                                |            |       |    |         |
| 772.931194 | 42205925.6    |                                                                                                |            |       |    |         |
| 772.944082 | 41352566.3    |                                                                                                |            |       |    |         |
| 772.953165 | 38780417.8    |                                                                                                |            |       |    |         |
| 772.967127 | 40673204.9    |                                                                                                |            |       |    |         |
| 772.975488 | 39502920.3    |                                                                                                |            |       |    |         |
| 773.001209 | 64043153.6    |                                                                                                |            |       |    |         |
| 773.013450 | 67348590.9    |                                                                                                |            |       |    |         |
| 773.033820 | 338419726.7   |                                                                                                |            |       |    |         |
| 773.080678 | 4334640920.0  | C <sub>172</sub> H <sub>217</sub> N <sub>56</sub> O <sub>88</sub> P <sub>15</sub> S            | 773.079889 | 1.021 | -7 | M - 7H  |
|            |               | 15                                                                                             |            |       |    |         |
| 773.122035 | 143228451.8   |                                                                                                |            |       |    |         |
| 773.134550 | 162580579.6   |                                                                                                |            |       |    |         |
| 773.145046 | 154854387.3   |                                                                                                |            |       |    |         |
| 773.157826 | 190312316.0   |                                                                                                |            |       |    |         |
| 773.177031 | 834897457.7   |                                                                                                |            |       |    |         |
| 773.223861 | 10074010261.0 |                                                                                                |            |       |    |         |
| 773.255057 | 375664185.1   |                                                                                                |            |       |    |         |
| 773.268236 | 273777491.0   |                                                                                                |            |       |    |         |
| 773.278956 | 295359946.8   |                                                                                                |            |       |    |         |
| 773.290526 | 275122752.8   |                                                                                                |            |       |    |         |



|            |                   |
|------------|-------------------|
| 773.366887 | 15856668303.<br>0 |
| 773.386826 | 931262990.5       |
| 773.399614 | 436685264.9       |
| 773.417899 | 354074853.2       |
| 773.441335 | 301643741.4       |
| 773.463095 | 1374813013.0      |
| 773.510113 | 17444916642.<br>0 |
| 773.551591 | 383723847.0       |
| 773.563388 | 453283181.2       |
| 773.587127 | 365551983.6       |
| 773.605710 | 1213611048.0      |
| 773.619280 | 620144913.0       |
| 773.652860 | 15607582125.<br>0 |
| 773.684376 | 513266925.0       |
| 773.698429 | 317220376.5       |
| 773.708000 | 303809549.4       |
| 773.719870 | 294718778.0       |
| 773.747459 | 913136244.7       |
| 773.795807 | 11243680861.<br>0 |
| 773.848347 | 258311655.9       |
| 773.858319 | 210695564.4       |
| 773.890313 | 667414017.7       |
| 773.904252 | 330831474.4       |
| 773.938756 | 7960275218.0      |
| 773.967999 | 281007198.1       |
| 773.982382 | 168641523.9       |
| 773.993178 | 193301441.3       |
| 774.004723 | 150944656.4       |
| 774.033608 | 443317673.4       |
| 774.050696 | 196477322.2       |
| 774.081452 | 5089737398.0      |
| 774.113218 | 148483708.9       |
| 774.133276 | 117202640.4       |
| 774.149289 | 67636068.7        |
| 774.176001 | 284896373.0       |
| 774.224531 | 3107999612.0      |
| 774.277340 | 77573069.4        |
| 774.289472 | 56150794.3        |
| 774.302350 | 49374040.4        |
| 774.319241 | 172704444.1       |
| 774.336788 | 72075043.1        |
| 774.367116 | 1889863539.0      |
| 774.399112 | 52905034.7        |
| 774.421701 | 33846975.0        |
| 774.434935 | 24955793.7        |
| 774.464062 | 94146099.7        |
| 774.510377 | 1053690591.0      |
| 774.563540 | 21348859.5        |
| 774.583682 | 39890352.0        |
| 774.605171 | 42829536.1        |
| 774.653161 | 602765818.3       |
| 774.686327 | 23021836.7        |
| 774.703082 | 26218119.6        |
| 774.746668 | 44253526.0        |
| 774.796146 | 312534314.6       |
| 774.823822 | 19209506.5        |

|            |              |
|------------|--------------|
| 774.886091 | 16743757.2   |
| 774.939835 | 154624208.3  |
| 775.082930 | 124919379.9  |
| 775.104968 | 22484866.1   |
| 775.224358 | 47908280.4   |
| 775.249363 | 42033908.0   |
| 775.345035 | 24812042.5   |
| 775.364710 | 44293535.2   |
| 775.414407 | 33766669.3   |
| 775.507936 | 47870275.3   |
| 775.580764 | 22201703.7   |
| 775.650773 | 59494077.8   |
| 775.683261 | 28878201.3   |
| 775.747700 | 16240522.5   |
| 775.794144 | 60170795.9   |
| 775.851897 | 25224095.5   |
| 775.938176 | 55795808.2   |
| 776.081931 | 52227287.4   |
| 776.173374 | 61278723.7   |
| 776.198458 | 30330097.6   |
| 776.221086 | 763181671.2  |
| 776.253707 | 24669608.2   |
| 776.273830 | 35132560.0   |
| 776.284256 | 28174854.1   |
| 776.296644 | 31652893.4   |
| 776.316874 | 128582026.2  |
| 776.364297 | 1715108008.0 |
| 776.394608 | 68077512.8   |
| 776.408465 | 45689506.4   |
| 776.420107 | 44035321.2   |
| 776.430674 | 46447014.0   |
| 776.459565 | 185342447.5  |
| 776.507164 | 2448713372.0 |
| 776.559310 | 63354165.5   |
| 776.571419 | 56288525.7   |
| 776.583067 | 46967412.0   |
| 776.602267 | 186418839.9  |
| 776.616355 | 97724307.4   |
| 776.650015 | 2561250836.0 |
| 776.681098 | 88120679.1   |
| 776.703849 | 53881439.4   |
| 776.717754 | 48525776.1   |
| 776.744746 | 174225560.2  |
| 776.793065 | 2247368425.0 |
| 776.835395 | 43172039.2   |
| 776.846254 | 56242318.8   |
| 776.857967 | 45624050.5   |
| 776.870948 | 42471176.3   |
| 776.887500 | 132731027.9  |
| 776.904832 | 62160523.0   |
| 776.935716 | 1685634174.0 |
| 776.967550 | 50032312.8   |
| 776.987657 | 35862624.0   |
| 777.009675 | 26891128.6   |
| 777.030223 | 91954246.4   |
| 777.043129 | 44204536.2   |
| 777.078818 | 1156090529.0 |
| 777.108350 | 41398196.8   |
| 777.124149 | 21215022.1   |
| 777.132922 | 26427182.9   |

---

|            |             |                                                                                                               |            |       |    |                     |
|------------|-------------|---------------------------------------------------------------------------------------------------------------|------------|-------|----|---------------------|
| 777.145144 | 21374786.9  |                                                                                                               |            |       |    |                     |
| 777.172898 | 58770226.1  |                                                                                                               |            |       |    |                     |
| 777.221693 | 717384032.2 |                                                                                                               |            |       |    |                     |
| 777.275010 | 17552765.9  |                                                                                                               |            |       |    |                     |
| 777.315722 | 32066784.5  |                                                                                                               |            |       |    |                     |
| 777.364339 | 397523312.9 |                                                                                                               |            |       |    |                     |
| 777.458580 | 17394664.9  |                                                                                                               |            |       |    |                     |
| 777.507511 | 207164678.8 |                                                                                                               |            |       |    |                     |
| 777.650338 | 106624908.5 |                                                                                                               |            |       |    |                     |
| 777.793601 | 54793831.3  |                                                                                                               |            |       |    |                     |
| 777.936525 | 33981801.5  |                                                                                                               |            |       |    |                     |
| 778.079709 | 31275593.0  |                                                                                                               |            |       |    |                     |
| 778.501752 | 183436533.6 |                                                                                                               |            |       |    |                     |
| 778.579742 | 26625210.0  |                                                                                                               |            |       |    |                     |
| 778.591975 | 27301723.6  |                                                                                                               |            |       |    |                     |
| 778.644881 | 373923185.1 |                                                                                                               |            |       |    |                     |
| 778.745850 | 66681019.6  |                                                                                                               |            |       |    |                     |
| 778.788034 | 480816821.1 |                                                                                                               |            |       |    |                     |
| 778.883586 | 37547448.0  |                                                                                                               |            |       |    |                     |
| 778.930920 | 526394417.8 |                                                                                                               |            |       |    |                     |
| 778.953624 | 23929056.2  |                                                                                                               |            |       |    |                     |
| 778.983537 | 17082831.0  |                                                                                                               |            |       |    |                     |
| 779.026015 | 32327647.2  |                                                                                                               |            |       |    |                     |
| 779.073715 | 437755261.4 |                                                                                                               |            |       |    |                     |
| 779.169126 | 23001843.8  |                                                                                                               |            |       |    |                     |
| 779.216293 | 294135353.8 |                                                                                                               |            |       |    |                     |
| 779.236879 | 35778409.8  |                                                                                                               |            |       |    |                     |
| 779.312352 | 16340064.1  |                                                                                                               |            |       |    |                     |
| 779.359344 | 218888488.9 |                                                                                                               |            |       |    |                     |
| 779.419078 | 18203144.4  |                                                                                                               |            |       |    |                     |
| 779.502341 | 165631735.0 |                                                                                                               |            |       |    |                     |
| 779.576213 | 15857164.7  |                                                                                                               |            |       |    |                     |
| 779.645521 | 123937370.4 |                                                                                                               |            |       |    |                     |
| 779.789226 | 93930025.4  |                                                                                                               |            |       |    |                     |
| 779.932579 | 65900060.4  |                                                                                                               |            |       |    |                     |
| 780.075893 | 47745062.2  |                                                                                                               |            |       |    |                     |
| 780.219252 | 36846721.3  |                                                                                                               |            |       |    |                     |
| 781.926606 | 16334942.8  |                                                                                                               |            |       |    |                     |
| 818.107523 | 19570031.6  | C <sub>56</sub> H <sub>70</sub> N <sub>14</sub> O <sub>28</sub> P <sub>4</sub> S <sub>4</sub>                 | 818.108589 | 1.303 | -2 | a5 - 2H, b5 - H2O   |
| 819.275617 | 17113993.2  | C <sub>130</sub> H <sub>165</sub> N <sub>38</sub> O <sub>68</sub> P <sub>12</sub> S                           | 819.275150 | -     | -5 | a13 - B(G) - OCH2   |
|            |             |                                                                                                               |            | 0.570 |    |                     |
| 819.474627 | 24544927.2  | <sup>12</sup> C <sub>126</sub> H <sub>162</sub> N <sub>44</sub> O <sub>66</sub> P <sub>12</sub> S             | 819.476178 | 1.893 | -5 | w12 + 2H            |
|            |             |                                                                                                               |            |       |    |                     |
| 823.337198 | 18992478.1  | <sup>12</sup> C <sub>106</sub> H <sub>132</sub> N <sub>33</sub> O <sub>54</sub> P <sub>9</sub> S <sub>9</sub> | 823.335782 | -     | -4 | b10 - H2O, a10 - 2H |
|            |             |                                                                                                               |            | 1.720 |    |                     |
| 823.587193 | 21435512.6  |                                                                                                               |            |       |    |                     |
| 823.836964 | 16417339.9  |                                                                                                               |            |       |    |                     |
| 846.790968 | 16112235.2  |                                                                                                               |            |       |    |                     |
| 847.041412 | 22849771.6  |                                                                                                               |            |       |    |                     |
| 858.078070 | 20938921.2  |                                                                                                               |            |       |    |                     |
| 858.245256 | 26422512.1  |                                                                                                               |            |       |    |                     |
| 858.412626 | 24927683.3  |                                                                                                               |            |       |    |                     |
| 861.547175 | 15858404.2  |                                                                                                               |            |       |    |                     |
| 861.673564 | 17225979.7  |                                                                                                               |            |       |    |                     |
| 861.799307 | 22114962.4  |                                                                                                               |            |       |    |                     |
| 861.925084 | 16604723.6  |                                                                                                               |            |       |    |                     |
| 863.295211 | 50952106.3  |                                                                                                               |            |       |    |                     |
| 863.364804 | 17840397.9  |                                                                                                               |            |       |    |                     |
| 863.420738 | 69886690.7  |                                                                                                               |            |       |    |                     |
| 863.489259 | 28934006.5  |                                                                                                               |            |       |    |                     |

|            |             |                                                                                                   |            |       |    |  |                     |
|------------|-------------|---------------------------------------------------------------------------------------------------|------------|-------|----|--|---------------------|
| 863.546419 | 122452002.6 |                                                                                                   |            |       |    |  |                     |
| 863.614566 | 38663979.9  |                                                                                                   |            |       |    |  |                     |
| 863.671535 | 143488494.6 |                                                                                                   |            |       |    |  |                     |
| 863.738590 | 34208294.9  |                                                                                                   |            |       |    |  |                     |
| 863.793287 | 154674530.9 |                                                                                                   |            |       |    |  |                     |
| 863.864536 | 31532378.9  |                                                                                                   |            |       |    |  |                     |
| 863.922918 | 151752254.3 |                                                                                                   |            |       |    |  |                     |
| 863.992750 | 22582877.2  |                                                                                                   |            |       |    |  |                     |
| 864.048708 | 141777562.4 |                                                                                                   |            |       |    |  |                     |
| 864.116886 | 20331907.1  |                                                                                                   |            |       |    |  |                     |
| 864.173645 | 163982367.0 |                                                                                                   |            |       |    |  |                     |
| 864.297991 | 105315361.1 |                                                                                                   |            |       |    |  |                     |
| 864.422716 | 50413201.0  |                                                                                                   |            |       |    |  |                     |
| 864.546540 | 31700461.7  |                                                                                                   |            |       |    |  |                     |
| 866.420306 | 37447829.4  |                                                                                                   |            |       |    |  |                     |
| 866.546060 | 43217974.7  |                                                                                                   |            |       |    |  |                     |
| 866.669855 | 39519090.1  |                                                                                                   |            |       |    |  |                     |
| 866.793902 | 24247019.4  |                                                                                                   |            |       |    |  |                     |
| 881.428923 | 27230849.9  |                                                                                                   |            |       |    |  |                     |
| 881.764032 | 37116876.6  | C <sub>86</sub> H <sub>107</sub> N <sub>26</sub> O <sub>44</sub> P <sub>7</sub> S <sub>7</sub>    | 881.764150 | 0.134 | -3 |  | b8 - H2O, a8 - 2H   |
| 882.097217 | 28425847.0  |                                                                                                   |            |       |    |  |                     |
| 882.432957 | 19704412.5  |                                                                                                   |            |       |    |  |                     |
| 887.097359 | 36084433.9  | C <sub>56</sub> H <sub>73</sub> N <sub>18</sub> O <sub>29</sub> P <sub>5</sub> S <sub>5</sub>     | 887.096848 | -     | -2 |  | w5                  |
|            |             |                                                                                                   |            | 0.576 |    |  |                     |
| 887.598445 | 16180782.7  |                                                                                                   |            |       |    |  |                     |
| 901.928236 | 21684067.3  |                                                                                                   |            |       |    |  |                     |
| 902.096213 | 65093486.1  |                                                                                                   |            |       |    |  |                     |
| 902.263695 | 99978697.4  |                                                                                                   |            |       |    |  |                     |
| 902.367849 | 23153881.9  |                                                                                                   |            |       |    |  |                     |
| 902.432081 | 108638662.8 |                                                                                                   |            |       |    |  |                     |
| 902.535011 | 22324207.3  |                                                                                                   |            |       |    |  |                     |
| 902.598612 | 102453879.3 |                                                                                                   |            |       |    |  |                     |
| 902.700301 | 28507464.3  |                                                                                                   |            |       |    |  |                     |
| 902.764430 | 135600532.4 |                                                                                                   |            |       |    |  |                     |
| 902.865082 | 18739315.5  |                                                                                                   |            |       |    |  |                     |
| 902.932167 | 105250922.8 |                                                                                                   |            |       |    |  |                     |
| 903.097389 | 119320691.1 |                                                                                                   |            |       |    |  |                     |
| 903.264784 | 74129212.0  |                                                                                                   |            |       |    |  |                     |
| 903.430814 | 64305415.2  |                                                                                                   |            |       |    |  |                     |
| 905.925285 | 17713797.1  |                                                                                                   |            |       |    |  |                     |
| 906.094511 | 39192167.6  |                                                                                                   |            |       |    |  |                     |
| 906.261629 | 27117157.4  |                                                                                                   |            |       |    |  |                     |
| 906.427004 | 31863699.9  |                                                                                                   |            |       |    |  |                     |
| 906.760884 | 18783521.5  |                                                                                                   |            |       |    |  |                     |
| 909.593124 | 23412234.1  | C <sub>116</sub> H <sub>144</sub> N <sub>38</sub> O <sub>59</sub> P <sub>10</sub> S <sub>10</sub> | 909.593201 | 0.085 | -4 |  | a11 - 2H, b11 - H2O |
| 909.844591 | 19331341.4  |                                                                                                   |            |       |    |  |                     |
| 922.426315 | 32502857.3  | C <sub>86</sub> H <sub>110</sub> N <sub>30</sub> O <sub>44</sub> P <sub>8</sub> S <sub>8</sub>    | 922.424684 | -     | -3 |  | w8                  |
|            |             |                                                                                                   |            | 1.768 |    |  |                     |
| 922.759491 | 35513859.4  | C <sub>86</sub> H <sub>111</sub> N <sub>30</sub> O <sub>44</sub> P <sub>8</sub> S <sub>8</sub>    | 922.760626 | 1.230 | -3 |  | w8 + 1H             |
| 923.092337 | 26388830.2  |                                                                                                   |            |       |    |  |                     |
| 986.771621 | 22294843.5  |                                                                                                   |            |       |    |  |                     |
| 986.916104 | 26189782.6  |                                                                                                   |            |       |    |  |                     |
| 986.976153 | 17345642.4  |                                                                                                   |            |       |    |  |                     |
| 987.055052 | 72554223.0  |                                                                                                   |            |       |    |  |                     |
| 987.120042 | 19369423.3  |                                                                                                   |            |       |    |  |                     |
| 987.198655 | 80198894.4  |                                                                                                   |            |       |    |  |                     |
| 987.264402 | 20758398.7  |                                                                                                   |            |       |    |  |                     |
| 987.341002 | 85851847.9  |                                                                                                   |            |       |    |  |                     |
| 987.409105 | 18284303.3  | C <sub>90</sub> H <sub>114</sub> N <sub>30</sub> O <sub>49</sub> P <sub>9</sub> S <sub>9</sub>    | 987.408586 | -     | -3 |  | w9 - B(A) -         |

|            |             |                                                                                               |            |       |    |                     |
|------------|-------------|-----------------------------------------------------------------------------------------------|------------|-------|----|---------------------|
|            |             |                                                                                               |            | 0.526 |    | CH3                 |
| 987.483500 | 92245507.3  |                                                                                               |            |       |    |                     |
| 987.625555 | 88094319.6  |                                                                                               |            |       |    |                     |
| 987.769387 | 99113910.6  |                                                                                               |            |       |    |                     |
| 987.912541 | 71220573.4  |                                                                                               |            |       |    |                     |
| 988.051056 | 27068137.1  |                                                                                               |            |       |    |                     |
| 988.198285 | 18729768.9  |                                                                                               |            |       |    |                     |
| 990.194575 | 20789868.6  |                                                                                               |            |       |    |                     |
| 990.338315 | 24212408.3  |                                                                                               |            |       |    |                     |
| 1024.34426 | 26254518.9  | C <sub>126</sub> H <sub>161</sub> N <sub>44</sub> O <sub>66</sub> P <sub>12</sub> S           | 1024.34508 | 0.801 | -4 | w12 + 1H            |
| 6          |             | 12                                                                                            | 6          |       |    |                     |
| 1052.10036 | 18575587.5  | C <sub>65</sub> H <sub>82</sub> N <sub>23</sub> O <sub>34</sub> P <sub>6</sub> S <sub>6</sub> | 1052.09994 | -     | -2 | w6 - CH3            |
| 0          |             |                                                                                               | 9          | 0.391 |    |                     |
| 1052.50243 | 63754996.3  |                                                                                               |            |       |    |                     |
| 3          |             |                                                                                               |            |       |    |                     |
| 1052.70213 | 62212497.5  |                                                                                               |            |       |    |                     |
| 7          |             |                                                                                               |            |       |    |                     |
| 1052.90275 | 47153161.2  |                                                                                               |            |       |    |                     |
| 9          |             |                                                                                               |            |       |    |                     |
| 1053.10411 | 24012500.2  |                                                                                               |            |       |    |                     |
| 2          |             |                                                                                               |            |       |    |                     |
| 1053.30439 | 22885735.3  |                                                                                               |            |       |    |                     |
| 8          |             |                                                                                               |            |       |    |                     |
| 1055.50185 | 15967392.9  | C <sub>167</sub> H <sub>211</sub> N <sub>51</sub> O <sub>88</sub> P <sub>15</sub> S           | 1055.50229 | 0.414 | -5 | M - 5H - 4H - dA    |
| 5          |             | 15                                                                                            | 2          |       |    |                     |
| 1055.70028 | 23732066.8  |                                                                                               |            |       |    |                     |
| 9          |             |                                                                                               |            |       |    |                     |
| 1055.90133 | 21568506.8  |                                                                                               |            |       |    |                     |
| 5          |             |                                                                                               |            |       |    |                     |
| 1075.60960 | 18965405.2  | C <sub>136</sub> H <sub>170</sub> N <sub>46</sub> O <sub>69</sub> P <sub>12</sub> S           | 1075.61041 | 0.754 | -4 | z13 - 2H, y13 - H2O |
| 4          |             | 12                                                                                            | 5          |       |    |                     |
| 1075.86103 | 22088284.9  |                                                                                               |            |       |    |                     |
| 3          |             |                                                                                               |            |       |    |                     |
| 1076.11071 | 34414699.3  |                                                                                               |            |       |    |                     |
| 1          |             |                                                                                               |            |       |    |                     |
| 1076.36119 | 19712292.2  |                                                                                               |            |       |    |                     |
| 9          |             |                                                                                               |            |       |    |                     |
| 1082.31041 | 84874754.0  | C <sub>172</sub> H <sub>215</sub> N <sub>56</sub> O <sub>88</sub> P <sub>15</sub> S           | 1082.31162 | 1.121 | -5 | M - 7H              |
| 3          |             | 15                                                                                            | 6          |       |    |                     |
| 1082.61918 | 25567295.2  |                                                                                               |            |       |    |                     |
| 0          |             |                                                                                               |            |       |    |                     |
| 1082.71116 | 293698963.9 |                                                                                               |            |       |    |                     |
| 5          |             |                                                                                               |            |       |    |                     |
| 1082.81970 | 29496334.1  |                                                                                               |            |       |    |                     |
| 0          |             |                                                                                               |            |       |    |                     |
| 1082.91113 | 265927766.4 |                                                                                               |            |       |    |                     |
| 4          |             |                                                                                               |            |       |    |                     |
| 1083.01843 | 28700199.2  |                                                                                               |            |       |    |                     |
| 0          |             |                                                                                               |            |       |    |                     |
| 1083.11222 | 219096346.6 |                                                                                               |            |       |    |                     |
| 8          |             |                                                                                               |            |       |    |                     |
| 1083.21682 | 21447401.0  |                                                                                               |            |       |    |                     |
| 7          |             |                                                                                               |            |       |    |                     |
| 1083.31516 | 154579955.9 |                                                                                               |            |       |    |                     |
| 7          |             |                                                                                               |            |       |    |                     |
| 1083.51607 | 126934842.1 |                                                                                               |            |       |    |                     |
| 2          |             |                                                                                               |            |       |    |                     |
| 1083.71816 | 60674057.8  |                                                                                               |            |       |    |                     |
| 4          |             |                                                                                               |            |       |    |                     |
| 1083.91537 | 42354647.1  |                                                                                               |            |       |    |                     |

|            |            |                                                                                               |            |       |    |              |  |
|------------|------------|-----------------------------------------------------------------------------------------------|------------|-------|----|--------------|--|
| 7          |            |                                                                                               |            |       |    |              |  |
| 1084.11163 | 29659549.7 |                                                                                               |            |       |    |              |  |
| 4          |            |                                                                                               |            |       |    |              |  |
| 1084.31193 | 20921223.6 |                                                                                               |            |       |    |              |  |
| 0          |            |                                                                                               |            |       |    |              |  |
| 1086.90848 | 22801339.6 |                                                                                               |            |       |    |              |  |
| 2          |            |                                                                                               |            |       |    |              |  |
| 1087.10681 | 20289929.3 |                                                                                               |            |       |    |              |  |
| 5          |            |                                                                                               |            |       |    |              |  |
| 1087.30870 | 24385286.1 |                                                                                               |            |       |    |              |  |
| 2          |            |                                                                                               |            |       |    |              |  |
| 1087.51051 | 36003920.7 |                                                                                               |            |       |    |              |  |
| 2          |            |                                                                                               |            |       |    |              |  |
| 1087.71361 | 29356786.5 |                                                                                               |            |       |    |              |  |
| 2          |            |                                                                                               |            |       |    |              |  |
| 1087.91256 | 17318814.4 |                                                                                               |            |       |    |              |  |
| 3          |            |                                                                                               |            |       |    |              |  |
| 1088.10968 | 17665523.0 |                                                                                               |            |       |    |              |  |
| 6          |            |                                                                                               |            |       |    |              |  |
| 1136.13581 | 21014505.2 | C <sub>36</sub> H <sub>46</sub> N <sub>13</sub> O <sub>18</sub> P <sub>3</sub> S <sub>3</sub> | 1136.13860 | 2.455 | -1 | w3           |  |
| 1          |            |                                                                                               | 0          |       |    |              |  |
| 1151.73102 | 29780909.2 |                                                                                               |            |       |    |              |  |
| 3          |            |                                                                                               |            |       |    |              |  |
| 1151.89639 | 23466870.9 |                                                                                               |            |       |    |              |  |
| 2          |            |                                                                                               |            |       |    |              |  |
| 1152.06199 | 52253253.1 |                                                                                               |            |       |    |              |  |
| 0          |            |                                                                                               |            |       |    |              |  |
| 1152.22770 | 47493622.9 |                                                                                               |            |       |    |              |  |
| 9          |            |                                                                                               |            |       |    |              |  |
| 1152.39908 | 37813837.5 |                                                                                               |            |       |    |              |  |
| 6          |            |                                                                                               |            |       |    |              |  |
| 1152.56385 | 26845493.4 |                                                                                               |            |       |    |              |  |
| 8          |            |                                                                                               |            |       |    |              |  |
| 1152.73235 | 18048895.3 |                                                                                               |            |       |    |              |  |
| 1          |            |                                                                                               |            |       |    |              |  |
| 1155.55650 | 16941790.0 |                                                                                               |            |       |    |              |  |
| 5          |            |                                                                                               |            |       |    |              |  |
| 1155.72594 | 22132995.9 |                                                                                               |            |       |    |              |  |
| 2          |            |                                                                                               |            |       |    |              |  |
| 1354.14145 | 26749605.9 |                                                                                               |            |       |    |              |  |
| 6          |            |                                                                                               |            |       |    |              |  |
| 1354.39408 | 28565442.8 |                                                                                               |            |       |    |              |  |
| 6          |            |                                                                                               |            |       |    |              |  |
| 1354.64147 | 26472335.7 |                                                                                               |            |       |    |              |  |
| 0          |            |                                                                                               |            |       |    |              |  |
| 1354.89296 | 24068795.8 |                                                                                               |            |       |    |              |  |
| 1          |            |                                                                                               |            |       |    |              |  |
| 1359.88609 | 20624595.1 |                                                                                               |            |       |    |              |  |
| 1          |            |                                                                                               |            |       |    |              |  |
| 1360.38640 | 16811857.2 |                                                                                               |            |       |    |              |  |
| 4          |            |                                                                                               |            |       |    |              |  |
| 1382.47328 | 17253307.6 | C <sub>131</sub> H <sub>170</sub> N <sub>38</sub> O <sub>70</sub> P <sub>12</sub> S           | 1382.47308 | -     | -3 | b13 - B(G) + |  |
| 0          |            | 12                                                                                            | 7          | 0.140 |    | 2H           |  |
| 1382.67295 | 24183287.2 |                                                                                               |            |       |    |              |  |
| 6          |            |                                                                                               |            |       |    |              |  |
|            |            |                                                                                               | Abs mean   | 1.080 |    |              |  |
|            |            |                                                                                               | error      |       |    |              |  |
|            |            |                                                                                               | Abs mean   | 0.726 |    |              |  |
|            |            |                                                                                               | std dev    |       |    |              |  |

**Table S19 showing peak list, intensity, elemental composition, and possible assignments with mass errors (ppm) of danvatirsen using 2D-UVPD-MS of eight scans accumulated and no denoising of [M-8H]<sup>8-</sup> precursor ion (note, noise peaks were included to highlight the effect of denoising).**

| Measured <i>mz</i> | Intensity  | Elemental Composition | Theoretical <i>mz</i> | Error (ppm) | Charge | Assignment |
|--------------------|------------|-----------------------|-----------------------|-------------|--------|------------|
| 200.425558         | 6283539.9  |                       |                       |             |        |            |
| 200.462841         | 5628581.4  |                       |                       |             |        |            |
| 225.438893         | 10564576.9 |                       |                       |             |        |            |
| 225.476471         | 8765118.5  |                       |                       |             |        |            |
| 225.480426         | 20235333.8 |                       |                       |             |        |            |
| 225.518172         | 7412878.0  |                       |                       |             |        |            |
| 225.522299         | 21003522.4 |                       |                       |             |        |            |
| 225.559906         | 9072240.0  |                       |                       |             |        |            |
| 225.560642         | 11126083.0 |                       |                       |             |        |            |
| 225.563882         | 24188506.1 |                       |                       |             |        |            |
| 225.601777         | 5331210.5  |                       |                       |             |        |            |
| 225.606030         | 29049693.2 |                       |                       |             |        |            |
| 225.643932         | 6298006.9  |                       |                       |             |        |            |
| 225.647212         | 14118482.3 |                       |                       |             |        |            |
| 225.689457         | 10128796.4 |                       |                       |             |        |            |
| 230.210639         | 6809572.8  |                       |                       |             |        |            |
| 230.244376         | 6963468.3  |                       |                       |             |        |            |
| 230.277589         | 6843291.7  |                       |                       |             |        |            |
| 230.311181         | 6504221.7  |                       |                       |             |        |            |
| 255.791807         | 9156258.4  |                       |                       |             |        |            |
| 255.828731         | 13964739.8 |                       |                       |             |        |            |
| 255.866139         | 20940972.7 |                       |                       |             |        |            |
| 255.897366         | 5413032.3  |                       |                       |             |        |            |
| 255.898092         | 5370569.2  |                       |                       |             |        |            |
| 255.903066         | 22720304.8 |                       |                       |             |        |            |
| 255.940279         | 23385758.8 |                       |                       |             |        |            |
| 255.977210         | 13964772.8 |                       |                       |             |        |            |
| 256.014432         | 10933694.0 |                       |                       |             |        |            |
| 256.051422         | 6178323.8  |                       |                       |             |        |            |
| 257.694434         | 9780754.6  |                       |                       |             |        |            |
| 257.736907         | 6375802.8  |                       |                       |             |        |            |
| 257.742072         | 20943680.9 |                       |                       |             |        |            |
| 257.784429         | 6079372.6  |                       |                       |             |        |            |
| 257.789770         | 24492470.3 |                       |                       |             |        |            |
| 257.832056         | 7115408.1  |                       |                       |             |        |            |
| 257.837401         | 26857685.5 |                       |                       |             |        |            |
| 257.879661         | 6857935.1  |                       |                       |             |        |            |
| 257.885291         | 22473433.8 |                       |                       |             |        |            |
| 257.932675         | 15526231.5 |                       |                       |             |        |            |
| 257.980557         | 7907829.8  |                       |                       |             |        |            |
| 258.028325         | 6167080.5  |                       |                       |             |        |            |
| 287.809935         | 11299606.3 |                       |                       |             |        |            |
| 287.851290         | 17235836.1 |                       |                       |             |        |            |
| 287.893096         | 20523761.3 |                       |                       |             |        |            |
| 287.927728         | 6526855.8  |                       |                       |             |        |            |
| 287.935076         | 20933946.7 |                       |                       |             |        |            |
| 287.976753         | 16294621.4 |                       |                       |             |        |            |
| 288.018365         | 11478101.3 |                       |                       |             |        |            |
| 288.059933         | 8007292.1  |                       |                       |             |        |            |
| 288.101617         | 5631749.5  |                       |                       |             |        |            |
| 300.757844         | 10864341.1 |                       |                       |             |        |            |
| 300.813637         | 14085221.6 |                       |                       |             |        |            |

|            |             |
|------------|-------------|
| 300.869185 | 13089753.2  |
| 300.924915 | 10196626.9  |
| 300.979957 | 7313086.5   |
| 301.035630 | 5361555.0   |
| 329.023385 | 8831407.2   |
| 329.071255 | 8974949.8   |
| 329.118858 | 8761442.4   |
| 329.166318 | 6757794.4   |
| 329.214359 | 6336887.0   |
| 338.148919 | 9996115.4   |
| 338.157618 | 86050786.4  |
| 338.166937 | 9357618.2   |
| 338.211984 | 23399455.1  |
| 338.220381 | 177494085.7 |
| 338.227194 | 12193973.4  |
| 338.229887 | 24982756.6  |
| 338.265311 | 5333752.6   |
| 338.274441 | 40837490.5  |
| 338.282972 | 238611139.4 |
| 338.288848 | 10798147.6  |
| 338.292424 | 29318420.6  |
| 338.328669 | 6391733.2   |
| 338.336519 | 16268964.8  |
| 338.345279 | 117302715.8 |
| 338.354877 | 12837458.9  |
| 338.399620 | 23633136.4  |
| 338.408128 | 131695057.9 |
| 338.417500 | 14667035.1  |
| 338.457906 | 5496055.0   |
| 338.462611 | 20814561.9  |
| 338.470569 | 163063350.6 |
| 338.480093 | 18049850.3  |
| 338.524765 | 16055415.2  |
| 338.533045 | 115202339.5 |
| 338.542252 | 12997218.8  |
| 338.587176 | 6452986.8   |
| 338.595476 | 49465456.7  |
| 338.605597 | 6696162.2   |
| 338.658021 | 21080000.7  |
| 338.720672 | 26919934.6  |
| 338.783535 | 19364295.7  |
| 338.844893 | 6019677.9   |
| 339.531560 | 10029719.0  |
| 339.594462 | 8439749.5   |
| 339.656739 | 14253734.1  |
| 339.719468 | 20814921.2  |
| 339.782124 | 18199472.0  |
| 339.843707 | 9182199.9   |
| 361.113056 | 5767694.0   |
| 383.685358 | 5352942.9   |
| 386.969608 | 7972403.8   |
| 431.769954 | 6341798.1   |
| 431.772778 | 6472232.0   |
| 450.963783 | 7264978.4   |
| 451.048442 | 10696618.4  |
| 451.382093 | 10076517.8  |
| 451.463471 | 5652740.5   |
| 493.530118 | 7702541.5   |
| 493.671806 | 6680951.7   |
| 609.309896 | 11550987.1  |

---



|            |             |                                  |            |        |    |                   |
|------------|-------------|----------------------------------|------------|--------|----|-------------------|
| 609.559242 | 9216438.5   | $C_{76}H_{99}N_{25}O_{40}P_7S_7$ | 609.559960 | 1.178  | -4 | w7 + 1H           |
| 609.810216 | 7808747.2   |                                  |            |        |    |                   |
| 651.744645 | 9225509.9   | $C_{66}H_{83}N_{16}O_{34}P_5S_5$ | 651.744365 | -0.430 | -3 | a6 - 2H, b6 - H2O |
| 657.564527 | 5743051.6   |                                  |            |        |    |                   |
| 657.595375 | 14006995.2  |                                  |            |        |    |                   |
| 657.814236 | 12567703.7  |                                  |            |        |    |                   |
| 657.938688 | 9221949.9   |                                  |            |        |    |                   |
| 658.096299 | 15484725.9  | $C_{46}H_{57}N_{12}O_{22}P_3S_3$ | 658.096992 | 1.053  | -2 | a4 - 2H, b4 - H2O |
| 658.192303 | 5537026.2   |                                  |            |        |    |                   |
| 659.438703 | 14657069.4  |                                  |            |        |    |                   |
| 659.564205 | 30084876.6  |                                  |            |        |    |                   |
| 659.688905 | 55570588.8  |                                  |            |        |    |                   |
| 659.781251 | 5890799.1   |                                  |            |        |    |                   |
| 659.814191 | 70581335.3  |                                  |            |        |    |                   |
| 659.939619 | 38193419.4  |                                  |            |        |    |                   |
| 660.064381 | 28268046.5  |                                  |            |        |    |                   |
| 660.190927 | 14735174.3  |                                  |            |        |    |                   |
| 660.317239 | 8068170.7   |                                  |            |        |    |                   |
| 662.438245 | 7356643.8   |                                  |            |        |    |                   |
| 662.560593 | 7694032.5   |                                  |            |        |    |                   |
| 673.699843 | 5609723.2   |                                  |            |        |    |                   |
| 673.820911 | 5656401.9   |                                  |            |        |    |                   |
| 673.826500 | 5576563.7   |                                  |            |        |    |                   |
| 673.945478 | 8492406.5   |                                  |            |        |    |                   |
| 674.071544 | 5450020.8   |                                  |            |        |    |                   |
| 674.089927 | 13901930.3  | $C_{66}H_{84}N_{23}O_{32}P_5S_5$ | 674.090870 | 1.399  | -3 | y6                |
| 674.322631 | 57370597.1  |                                  |            |        |    |                   |
| 674.447981 | 125660984.7 |                                  |            |        |    |                   |
| 674.538726 | 10000074.7  |                                  |            |        |    |                   |
| 674.573342 | 222532358.1 |                                  |            |        |    |                   |
| 674.605544 | 6006663.7   |                                  |            |        |    |                   |
| 674.612821 | 6112957.9   |                                  |            |        |    |                   |
| 674.632176 | 6209525.6   |                                  |            |        |    |                   |
| 674.662890 | 12500210.5  |                                  |            |        |    |                   |
| 674.698158 | 243531417.2 |                                  |            |        |    |                   |
| 674.733746 | 6932359.1   |                                  |            |        |    |                   |
| 674.785529 | 14146881.1  |                                  |            |        |    |                   |
| 674.799090 | 10050048.1  |                                  |            |        |    |                   |
| 674.823208 | 236531015.8 |                                  |            |        |    |                   |
| 674.847057 | 8402166.4   |                                  |            |        |    |                   |
| 674.864656 | 6385417.0   |                                  |            |        |    |                   |
| 674.910776 | 13490518.5  |                                  |            |        |    |                   |
| 674.924748 | 6602609.0   |                                  |            |        |    |                   |
| 674.948454 | 196619717.5 |                                  |            |        |    |                   |
| 674.978997 | 5395263.7   |                                  |            |        |    |                   |
| 675.036969 | 11444742.0  |                                  |            |        |    |                   |
| 675.052909 | 6983351.2   |                                  |            |        |    |                   |
| 675.073115 | 136537023.5 |                                  |            |        |    |                   |
| 675.093744 | 7509758.8   |                                  |            |        |    |                   |
| 675.164049 | 7498853.9   |                                  |            |        |    |                   |
| 675.197688 | 97864741.5  |                                  |            |        |    |                   |
| 675.292823 | 6026325.4   |                                  |            |        |    |                   |
| 675.323435 | 60621294.0  |                                  |            |        |    |                   |
| 675.354785 | 5495965.5   |                                  |            |        |    |                   |
| 675.448433 | 40240666.9  |                                  |            |        |    |                   |
| 675.519134 | 5366127.6   |                                  |            |        |    |                   |
| 675.574090 | 19410015.3  |                                  |            |        |    |                   |
| 675.629496 | 6262650.1   |                                  |            |        |    |                   |
| 675.650416 | 6054593.2   |                                  |            |        |    |                   |

|            |              |                                                                                     |            |       |    |        |
|------------|--------------|-------------------------------------------------------------------------------------|------------|-------|----|--------|
| 675.694376 | 12480324.5   |                                                                                     |            |       |    |        |
| 675.725929 | 7278682.7    |                                                                                     |            |       |    |        |
| 675.749610 | 6625046.3    |                                                                                     |            |       |    |        |
| 675.778449 | 5917186.7    |                                                                                     |            |       |    |        |
| 675.786051 | 6462040.0    |                                                                                     |            |       |    |        |
| 675.800513 | 6074806.0    |                                                                                     |            |       |    |        |
| 675.818630 | 9515328.9    |                                                                                     |            |       |    |        |
| 675.834668 | 5773140.8    |                                                                                     |            |       |    |        |
| 675.848449 | 5334317.9    |                                                                                     |            |       |    |        |
| 675.865393 | 6756735.1    |                                                                                     |            |       |    |        |
| 675.879516 | 6993720.3    |                                                                                     |            |       |    |        |
| 675.895760 | 10740931.1   |                                                                                     |            |       |    |        |
| 675.920726 | 7381275.0    |                                                                                     |            |       |    |        |
| 675.931816 | 10246538.4   |                                                                                     |            |       |    |        |
| 675.947918 | 9433826.0    |                                                                                     |            |       |    |        |
| 675.960880 | 7142499.9    |                                                                                     |            |       |    |        |
| 675.966952 | 7346501.8    |                                                                                     |            |       |    |        |
| 675.978491 | 7681420.6    |                                                                                     |            |       |    |        |
| 675.985431 | 8524541.4    |                                                                                     |            |       |    |        |
| 676.003043 | 9110422.0    |                                                                                     |            |       |    |        |
| 676.014338 | 7945611.4    |                                                                                     |            |       |    |        |
| 676.018911 | 8127329.6    |                                                                                     |            |       |    |        |
| 676.033839 | 9751354.4    |                                                                                     |            |       |    |        |
| 676.046927 | 9558692.4    |                                                                                     |            |       |    |        |
| 676.066302 | 12245651.8   |                                                                                     |            |       |    |        |
| 676.075894 | 11804414.3   |                                                                                     |            |       |    |        |
| 676.091773 | 10824859.9   |                                                                                     |            |       |    |        |
| 676.100839 | 11041833.2   |                                                                                     |            |       |    |        |
| 676.110154 | 11034627.3   |                                                                                     |            |       |    |        |
| 676.118670 | 12491458.5   |                                                                                     |            |       |    |        |
| 676.128009 | 11951069.6   |                                                                                     |            |       |    |        |
| 676.136391 | 12893707.7   |                                                                                     |            |       |    |        |
| 676.145538 | 13175443.8   |                                                                                     |            |       |    |        |
| 676.154305 | 14177985.9   |                                                                                     |            |       |    |        |
| 676.163771 | 12829779.9   |                                                                                     |            |       |    |        |
| 676.171431 | 14954588.3   |                                                                                     |            |       |    |        |
| 676.182275 | 16030382.2   |                                                                                     |            |       |    |        |
| 676.200704 | 20141186.0   |                                                                                     |            |       |    |        |
| 676.206440 | 21430644.5   |                                                                                     |            |       |    |        |
| 676.216953 | 21116880.7   |                                                                                     |            |       |    |        |
| 676.224473 | 21616397.5   |                                                                                     |            |       |    |        |
| 676.234203 | 27503131.8   |                                                                                     |            |       |    |        |
| 676.243079 | 26204517.4   |                                                                                     |            |       |    |        |
| 676.260339 | 44000645.4   |                                                                                     |            |       |    |        |
| 676.271087 | 57941805.8   |                                                                                     |            |       |    |        |
| 676.284175 | 268050987.1  |                                                                                     |            |       |    |        |
| 676.319520 | 3711390056.0 | C <sub>172</sub> H <sub>217</sub> N <sub>56</sub> O <sub>88</sub> P <sub>15</sub> S | 676.318994 | 0.778 | -8 | M - 8H |
| 676.344241 | 122742875.8  |                                                                                     |            |       |    |        |
| 676.357549 | 105487206.1  |                                                                                     |            |       |    |        |
| 676.365117 | 86936364.8   |                                                                                     |            |       |    |        |
| 676.377010 | 94011437.8   |                                                                                     |            |       |    |        |
| 676.384861 | 118879772.2  |                                                                                     |            |       |    |        |
| 676.394535 | 139547018.0  |                                                                                     |            |       |    |        |
| 676.409713 | 684000758.1  |                                                                                     |            |       |    |        |
| 676.445011 | 8954261760.0 |                                                                                     |            |       |    |        |
| 676.468475 | 313950146.2  |                                                                                     |            |       |    |        |
| 676.479138 | 228051872.8  |                                                                                     |            |       |    |        |
| 676.486103 | 222857652.6  |                                                                                     |            |       |    |        |
| 676.495905 | 175403236.3  |                                                                                     |            |       |    |        |

15

|            |                   |
|------------|-------------------|
| 676.534596 | 1102491393.0      |
| 676.570276 | 14365938101.<br>0 |
| 676.591562 | 511729878.4       |
| 676.603104 | 337366017.9       |
| 676.610838 | 359073763.6       |
| 676.620154 | 276488335.0       |
| 676.629861 | 261415017.3       |
| 676.638202 | 272524119.0       |
| 676.659512 | 1307530743.0      |
| 676.695436 | 17369331900.<br>0 |
| 676.726597 | 353998253.5       |
| 676.735438 | 411528252.0       |
| 676.744338 | 308340133.9       |
| 676.754017 | 277295195.7       |
| 676.762467 | 295337928.6       |
| 676.784191 | 1205385738.0      |
| 676.820452 | 15686659085.<br>0 |
| 676.860070 | 352688891.4       |
| 676.868327 | 260495042.8       |
| 676.878293 | 226144989.4       |
| 676.886845 | 246936378.1       |
| 676.897896 | 261729751.9       |
| 676.908856 | 943592409.5       |
| 676.922619 | 390400457.7       |
| 676.945450 | 11784306288.<br>0 |
| 676.984796 | 246504257.2       |
| 677.002516 | 154335647.2       |
| 677.011314 | 170019123.1       |
| 677.021106 | 180120478.8       |
| 677.033987 | 663975679.1       |
| 677.046858 | 281469983.2       |
| 677.070426 | 8131876783.0      |
| 677.094075 | 233700629.6       |
| 677.109550 | 161020417.8       |
| 677.136851 | 125613628.1       |
| 677.144915 | 109970623.8       |
| 677.158954 | 455386749.1       |
| 677.171017 | 182575216.7       |
| 677.195459 | 5325518740.0      |
| 677.219209 | 172930662.1       |
| 677.235795 | 128509453.8       |
| 677.259638 | 60509101.3        |
| 677.269381 | 62286604.0        |
| 677.283995 | 272712479.9       |
| 677.295111 | 107390829.6       |
| 677.320473 | 3227589505.0      |
| 677.356426 | 58292797.9        |
| 677.361790 | 62648262.3        |
| 677.370346 | 42215107.6        |
| 677.389607 | 36529749.9        |
| 677.408965 | 154029837.7       |
| 677.422940 | 76003076.7        |
| 677.445662 | 1864724786.0      |
| 677.468206 | 63990151.6        |
| 677.480772 | 37626504.8        |
| 677.486251 | 38902577.7        |

---

|            |              |                                                                                     |            |       |        |
|------------|--------------|-------------------------------------------------------------------------------------|------------|-------|--------|
| 677.495593 | 26004738.5   |                                                                                     |            |       |        |
| 677.506852 | 22908267.4   |                                                                                     |            |       |        |
| 677.523039 | 41707174.5   |                                                                                     |            |       |        |
| 677.536525 | 55150402.4   |                                                                                     |            |       |        |
| 677.544699 | 35184311.8   |                                                                                     |            |       |        |
| 677.570749 | 1003745871.0 |                                                                                     |            |       |        |
| 677.605419 | 21260108.2   |                                                                                     |            |       |        |
| 677.612073 | 25302091.9   |                                                                                     |            |       |        |
| 677.624320 | 29014274.3   |                                                                                     |            |       |        |
| 677.635141 | 31907027.9   |                                                                                     |            |       |        |
| 677.659242 | 27226723.7   |                                                                                     |            |       |        |
| 677.670504 | 21012722.9   |                                                                                     |            |       |        |
| 677.695758 | 508497537.5  |                                                                                     |            |       |        |
| 677.718442 | 22584648.3   |                                                                                     |            |       |        |
| 677.735855 | 22591814.6   |                                                                                     |            |       |        |
| 677.745202 | 11332449.7   |                                                                                     |            |       |        |
| 677.754869 | 11072978.6   |                                                                                     |            |       |        |
| 677.762433 | 8643321.4    |                                                                                     |            |       |        |
| 677.783332 | 24905138.0   |                                                                                     |            |       |        |
| 677.796048 | 10979116.1   |                                                                                     |            |       |        |
| 677.820557 | 272252350.5  |                                                                                     |            |       |        |
| 677.856681 | 37475759.9   | C <sub>106</sub> H <sub>134</sub> N <sub>33</sub> O <sub>56</sub> P <sub>10</sub> S | 677.857433 | 1.109 | -5 c10 |
|            |              | 10                                                                                  |            |       |        |
| 677.888614 | 6827817.8    |                                                                                     |            |       |        |
| 677.907954 | 12854741.5   |                                                                                     |            |       |        |
| 677.925033 | 11307912.2   |                                                                                     |            |       |        |
| 677.945796 | 136138347.2  |                                                                                     |            |       |        |
| 678.024944 | 8189250.5    |                                                                                     |            |       |        |
| 678.039246 | 5422329.5    |                                                                                     |            |       |        |
| 678.054839 | 27250640.7   |                                                                                     |            |       |        |
| 678.071359 | 68118841.5   |                                                                                     |            |       |        |
| 678.129624 | 6654932.2    |                                                                                     |            |       |        |
| 678.196503 | 40599324.0   |                                                                                     |            |       |        |
| 678.231549 | 5562073.6    |                                                                                     |            |       |        |
| 678.257721 | 21615752.0   |                                                                                     |            |       |        |
| 678.320832 | 31434224.9   |                                                                                     |            |       |        |
| 678.333285 | 7152326.3    |                                                                                     |            |       |        |
| 678.358454 | 10186116.5   |                                                                                     |            |       |        |
| 678.444746 | 37698310.0   |                                                                                     |            |       |        |
| 678.461601 | 13570174.4   |                                                                                     |            |       |        |
| 678.569201 | 44943858.1   |                                                                                     |            |       |        |
| 678.654472 | 8337877.2    |                                                                                     |            |       |        |
| 678.693966 | 47380006.1   |                                                                                     |            |       |        |
| 678.818998 | 39465913.0   |                                                                                     |            |       |        |
| 678.855590 | 6666649.1    |                                                                                     |            |       |        |
| 678.944728 | 32964605.0   |                                                                                     |            |       |        |
| 678.991537 | 5332141.1    |                                                                                     |            |       |        |
| 679.031498 | 33642882.6   |                                                                                     |            |       |        |
| 679.067605 | 520890527.3  |                                                                                     |            |       |        |
| 679.088520 | 22492217.6   |                                                                                     |            |       |        |
| 679.109735 | 32226937.0   |                                                                                     |            |       |        |
| 679.116002 | 29502521.0   |                                                                                     |            |       |        |
| 679.136271 | 14914816.3   |                                                                                     |            |       |        |
| 679.156494 | 75441162.1   |                                                                                     |            |       |        |
| 679.192895 | 1118793539.0 |                                                                                     |            |       |        |
| 679.233661 | 30390334.8   |                                                                                     |            |       |        |
| 679.242705 | 23680310.6   |                                                                                     |            |       |        |
| 679.251812 | 21536236.4   |                                                                                     |            |       |        |
| 679.261058 | 21430605.5   |                                                                                     |            |       |        |
| 679.281579 | 102114727.1  |                                                                                     |            |       |        |

|            |              |
|------------|--------------|
| 679.318018 | 1547762847.0 |
| 679.351317 | 29720430.8   |
| 679.358876 | 37047518.8   |
| 679.367689 | 29828405.8   |
| 679.377587 | 25847099.8   |
| 679.386301 | 25753625.3   |
| 679.406639 | 115915299.4  |
| 679.443106 | 1659677233.0 |
| 679.477101 | 29268546.0   |
| 679.484389 | 39939099.9   |
| 679.492994 | 28677524.5   |
| 679.502761 | 25941250.9   |
| 679.512088 | 25036948.7   |
| 679.531562 | 101846497.4  |
| 679.568150 | 1449540041.0 |
| 679.590059 | 52242164.3   |
| 679.603159 | 25603607.9   |
| 679.609088 | 34763070.4   |
| 679.620976 | 22627131.0   |
| 679.637290 | 20253757.2   |
| 679.656665 | 76933807.0   |
| 679.693044 | 1064179883.0 |
| 679.716094 | 35747581.5   |
| 679.733879 | 21749485.1   |
| 679.743717 | 15577824.7   |
| 679.754338 | 11811952.7   |
| 679.767069 | 12519700.3   |
| 679.781409 | 49481217.0   |
| 679.792518 | 20480297.1   |
| 679.818007 | 704919478.1  |
| 679.856595 | 13433396.6   |
| 679.872892 | 8148914.1    |
| 679.883324 | 8957084.0    |
| 679.892971 | 6486607.8    |
| 679.906147 | 29364545.9   |
| 679.919306 | 11166204.6   |
| 679.942997 | 406437641.8  |
| 679.982473 | 7722971.6    |
| 679.990064 | 6235559.3    |
| 680.000190 | 5841154.1    |
| 680.018541 | 6695175.3    |
| 680.031417 | 13249843.9   |
| 680.067981 | 218560746.9  |
| 680.123883 | 5471049.6    |
| 680.156362 | 7522427.0    |
| 680.176140 | 5980645.0    |
| 680.193094 | 121835296.2  |
| 680.209376 | 7794365.7    |
| 680.317918 | 60812421.1   |
| 680.443168 | 29945405.2   |
| 680.567734 | 12810985.8   |
| 680.695264 | 9470752.2    |
| 681.028774 | 5385960.5    |
| 681.062484 | 66401964.2   |
| 681.152437 | 9173855.1    |
| 681.187912 | 147773019.0  |
| 681.277232 | 12723385.8   |
| 681.312905 | 177802561.8  |
| 681.329928 | 7847968.1    |
| 681.403325 | 14875185.6   |

---

|            |             |                                          |            |        |    |                   |
|------------|-------------|------------------------------------------|------------|--------|----|-------------------|
| 681.438155 | 159690318.1 |                                          |            |        |    |                   |
| 681.457022 | 8216506.4   |                                          |            |        |    |                   |
| 681.527707 | 8892202.5   |                                          |            |        |    |                   |
| 681.563403 | 144222874.0 |                                          |            |        |    |                   |
| 681.656144 | 9986318.8   |                                          |            |        |    |                   |
| 681.688346 | 106437895.1 |                                          |            |        |    |                   |
| 681.704897 | 7115469.0   |                                          |            |        |    |                   |
| 681.812794 | 73384331.3  |                                          |            |        |    |                   |
| 681.937548 | 52777004.1  |                                          |            |        |    |                   |
| 682.063506 | 40734526.0  |                                          |            |        |    |                   |
| 682.189023 | 27615023.3  |                                          |            |        |    |                   |
| 682.314498 | 15792067.4  |                                          |            |        |    |                   |
| 682.393667 | 11371508.7  |                                          |            |        |    |                   |
| 682.440207 | 10659373.8  |                                          |            |        |    |                   |
| 682.561340 | 15095652.1  |                                          |            |        |    |                   |
| 682.727340 | 11758538.7  |                                          |            |        |    |                   |
| 682.895621 | 8712312.6   |                                          |            |        |    |                   |
| 690.534144 | 13160516.5  |                                          |            |        |    |                   |
| 690.633217 | 22228587.0  |                                          |            |        |    |                   |
| 690.732166 | 26776322.9  |                                          |            |        |    |                   |
| 690.795078 | 5354786.4   |                                          |            |        |    |                   |
| 690.832070 | 52216398.1  |                                          |            |        |    |                   |
| 690.897282 | 6782820.2   |                                          |            |        |    |                   |
| 690.932856 | 35260976.4  |                                          |            |        |    |                   |
| 691.033791 | 23330967.5  |                                          |            |        |    |                   |
| 691.066093 | 6068146.5   |                                          |            |        |    |                   |
| 691.130161 | 15327810.7  |                                          |            |        |    |                   |
| 691.233932 | 10508235.0  |                                          |            |        |    |                   |
| 691.265306 | 6110901.3   | $C_{106}H_{135}N_{40}O_{54}P_{10}S_{10}$ | 691.265336 | 0.043  | -5 | w10 + 1H          |
| 691.335777 | 6219438.8   |                                          |            |        |    |                   |
| 727.084806 | 6556542.8   | $C_{46}H_{60}N_{16}O_{23}P_4S_4$         | 727.085251 | 0.612  | -2 | w4                |
| 727.873346 | 9172761.5   |                                          |            |        |    |                   |
| 735.638899 | 5803970.0   |                                          |            |        |    |                   |
| 735.783714 | 5832423.5   |                                          |            |        |    |                   |
| 743.079983 | 7376810.7   |                                          |            |        |    |                   |
| 743.330605 | 19127765.4  | $C_{96}H_{119}N_{31}O_{48}P_8S_8$        | 743.329984 | -0.835 | -4 | a9 - 2H, b9 - H2O |
| 743.581269 | 17119895.9  |                                          |            |        |    |                   |
| 743.831480 | 12537551.3  |                                          |            |        |    |                   |
| 747.405274 | 6486820.0   |                                          |            |        |    |                   |
| 747.571234 | 12183073.9  | $C_{51}H_{61}N_{10}O_{27}P_4S_4$         | 747.569771 | -1.957 | -2 | a5 - B(dC) - NH3  |
| 747.740528 | 12216790.4  |                                          |            |        |    |                   |
| 756.234292 | 7082383.6   |                                          |            |        |    |                   |
| 766.754484 | 14895610.4  | $C_{76}H_{95}N_{21}O_{39}P_6S_6$         | 766.754257 | -0.296 | -3 | a7 - 2H, b7 - H2O |
| 767.090639 | 23153471.6  |                                          |            |        |    |                   |
| 767.421282 | 18944377.2  |                                          |            |        |    |                   |
| 767.706835 | 8001143.3   |                                          |            |        |    |                   |
| 767.817845 | 6946879.4   |                                          |            |        |    |                   |
| 767.929163 | 7294697.3   |                                          |            |        |    |                   |
| 768.029243 | 7273050.9   |                                          |            |        |    |                   |
| 768.040284 | 5636748.6   |                                          |            |        |    |                   |
| 770.046890 | 14066709.5  |                                          |            |        |    |                   |
| 770.253840 | 5920132.2   |                                          |            |        |    |                   |
| 772.937332 | 17705766.6  |                                          |            |        |    |                   |
| 773.223449 | 5508254.4   |                                          |            |        |    |                   |
| 773.355865 | 13087360.6  |                                          |            |        |    |                   |
| 773.506481 | 10425160.8  |                                          |            |        |    |                   |

|            |            |                                     |            |       |    |                     |  |
|------------|------------|-------------------------------------|------------|-------|----|---------------------|--|
| 773.651522 | 9144505.4  |                                     |            |       |    |                     |  |
| 773.786355 | 5437728.2  |                                     |            |       |    |                     |  |
| 773.795281 | 6152600.4  |                                     |            |       |    |                     |  |
| 773.932829 | 5453761.2  |                                     |            |       |    |                     |  |
| 774.070193 | 8635289.7  |                                     |            |       |    |                     |  |
| 776.220645 | 7567384.4  |                                     |            |       |    |                     |  |
| 778.325844 | 6771042.9  |                                     |            |       |    |                     |  |
| 791.277064 | 6226487.4  |                                     |            |       |    |                     |  |
| 791.478748 | 28754417.4 | $C_{126}H_{157}N_{40}O_{65}P_{11}S$ | 791.477745 | -     | -5 | a12 - 2H, b12 - H2O |  |
|            |            | 11                                  |            | 1.267 |    |                     |  |
| 791.679354 | 36897129.9 |                                     |            |       |    |                     |  |
| 792.079746 | 30438966.8 |                                     |            |       |    |                     |  |
| 792.281366 | 13491149.7 |                                     |            |       |    |                     |  |
| 809.077764 | 5841456.5  |                                     |            |       |    |                     |  |
| 809.246136 | 15890250.6 |                                     |            |       |    |                     |  |
| 809.412196 | 22815707.5 |                                     |            |       |    |                     |  |
| 809.579732 | 18316372.6 |                                     |            |       |    |                     |  |
| 809.746787 | 15766667.4 |                                     |            |       |    |                     |  |
| 809.914779 | 6771103.0  |                                     |            |       |    |                     |  |
| 810.077140 | 5501691.1  |                                     |            |       |    |                     |  |
| 812.748202 | 9202391.3  | $C_{76}H_{98}N_{25}O_{40}P_7S_7$    | 812.746430 | -     | -3 | w7                  |  |
|            |            |                                     |            | 2.180 |    |                     |  |
| 819.074612 | 28569824.2 | $C_{126}H_{160}N_{44}O_{66}P_{12}S$ | 819.073048 | -     | -5 | w12                 |  |
|            |            | 12                                  |            | 1.909 |    |                     |  |
| 819.220415 | 5550435.0  |                                     |            |       |    |                     |  |
| 819.274962 | 52290415.6 | $C_{130}H_{165}N_{38}O_{68}P_{12}S$ | 819.275150 | 0.229 | -5 | a13 - B(G) - OCH2   |  |
|            |            | 12                                  |            |       |    |                     |  |
| 819.422534 | 7184155.3  |                                     |            |       |    |                     |  |
| 819.475402 | 63904557.3 | $C_{126}H_{162}N_{44}O_{66}P_{12}S$ | 819.476178 | 0.947 | -5 | w12 + 2H            |  |
|            |            | 12                                  |            |       |    |                     |  |
| 819.675886 | 45571726.5 |                                     |            |       |    |                     |  |
| 819.875976 | 15412186.9 |                                     |            |       |    |                     |  |
| 820.077956 | 6560619.1  |                                     |            |       |    |                     |  |
| 823.833035 | 5957543.9  |                                     |            |       |    |                     |  |
| 823.841855 | 6588368.4  |                                     |            |       |    |                     |  |
| 830.623490 | 5342580.2  |                                     |            |       |    |                     |  |
| 840.091565 | 7931207.1  |                                     |            |       |    |                     |  |
| 840.599579 | 8270514.0  | $C_{106}H_{135}N_{40}O_{52}P_9S_9$  | 840.599573 | -     | -4 | y10 + 2H            |  |
|            |            |                                     |            | 0.007 |    |                     |  |
| 860.430327 | 6262493.1  |                                     |            |       |    |                     |  |
| 860.488880 | 68891577.9 |                                     |            |       |    |                     |  |
| 860.628366 | 6829201.6  |                                     |            |       |    |                     |  |
| 860.689167 | 80972890.8 | $C_{136}H_{172}N_{46}O_{69}P_{12}S$ | 860.690007 | 0.976 | -5 | z13                 |  |
|            |            | 12                                  |            |       |    |                     |  |
| 860.829987 | 5879001.0  |                                     |            |       |    |                     |  |
| 861.089337 | 33395271.1 |                                     |            |       |    |                     |  |
| 861.288047 | 5519519.4  |                                     |            |       |    |                     |  |
| 876.751391 | 17358765.2 |                                     |            |       |    |                     |  |
| 876.918929 | 22152213.7 |                                     |            |       |    |                     |  |
| 877.085231 | 20495767.9 |                                     |            |       |    |                     |  |
| 877.254409 | 15467859.3 |                                     |            |       |    |                     |  |
| 879.419195 | 8041107.1  |                                     |            |       |    |                     |  |
| 879.584874 | 9788439.6  | $C_{55}H_{70}N_{18}O_{29}P_5S_5$    | 879.585111 | 0.269 | -2 | w5 - CH3            |  |
| 879.745011 | 9173166.0  |                                     |            |       |    |                     |  |
| 879.755507 | 7048694.5  |                                     |            |       |    |                     |  |
| 880.254828 | 8824063.2  |                                     |            |       |    |                     |  |
| 881.074885 | 6058578.9  | $C_{81}H_{104}N_{27}O_{43}P_8S_8$   | 881.074322 | -     | -3 | w8 - B(dC) + 1H     |  |
|            |            |                                     |            | 0.639 |    |                     |  |
| 881.244901 | 6804232.5  |                                     |            |       |    |                     |  |
| 881.420759 | 9691362.0  |                                     |            |       |    |                     |  |

|            |             |                                          |            |       |    |                   |       |
|------------|-------------|------------------------------------------|------------|-------|----|-------------------|-------|
| 881.761144 | 15091422.2  |                                          |            |       |    |                   |       |
| 882.098561 | 13568270.9  |                                          |            |       |    |                   |       |
| 884.441931 | 7133534.2   | $C_{86}H_{107}N_{30}O_{41}P_7S_7$        | 884.440000 | -     | -3 | y8 - H2O, z8 - 2H | 2.183 |
| 884.775315 | 16006561.0  |                                          |            |       |    |                   |       |
| 885.105826 | 14242401.0  |                                          |            |       |    |                   |       |
| 887.097153 | 10786752.6  | $C_{56}H_{73}N_{18}O_{29}P_5S_5$         | 887.096848 | -     | -2 | w5                | 0.344 |
| 899.591610 | 6861310.8   |                                          |            |       |    |                   |       |
| 899.601609 | 6400823.9   |                                          |            |       |    |                   |       |
| 899.769160 | 9292505.9   |                                          |            |       |    |                   |       |
| 901.694883 | 11287003.1  |                                          |            |       |    |                   |       |
| 901.733126 | 7728151.7   |                                          |            |       |    |                   |       |
| 901.759657 | 122586861.5 |                                          |            |       |    |                   |       |
| 901.792118 | 5810678.1   |                                          |            |       |    |                   |       |
| 901.862961 | 24235777.8  |                                          |            |       |    |                   |       |
| 901.899268 | 11855159.2  |                                          |            |       |    |                   |       |
| 901.926663 | 304344436.3 |                                          |            |       |    |                   |       |
| 901.958861 | 12865685.8  |                                          |            |       |    |                   |       |
| 901.999395 | 5380859.0   |                                          |            |       |    |                   |       |
| 902.029453 | 35997212.2  |                                          |            |       |    |                   |       |
| 902.092961 | 390071901.9 | $C_{61}H_{77}N_{11}O_{33}P_5S_5$         | 902.091568 | -     | -2 | a6 - B(dA) - H2O  | 1.544 |
| 902.124964 | 19214649.9  |                                          |            |       |    |                   |       |
| 902.163434 | 5823013.7   |                                          |            |       |    |                   |       |
| 902.191293 | 28783024.9  |                                          |            |       |    |                   |       |
| 902.254325 | 263406086.6 |                                          |            |       |    |                   |       |
| 902.290769 | 14367056.8  |                                          |            |       |    |                   |       |
| 902.356759 | 30776969.3  |                                          |            |       |    |                   |       |
| 902.425455 | 219862424.5 |                                          |            |       |    |                   |       |
| 902.763958 | 13620831.1  |                                          |            |       |    |                   |       |
| 905.423023 | 8408437.1   |                                          |            |       |    |                   |       |
| 905.590447 | 24573790.6  |                                          |            |       |    |                   |       |
| 905.751326 | 14933553.4  |                                          |            |       |    |                   |       |
| 905.761813 | 14971105.5  |                                          |            |       |    |                   |       |
| 905.920954 | 9045567.5   |                                          |            |       |    |                   |       |
| 908.417144 | 5446119.8   |                                          |            |       |    |                   |       |
| 909.842076 | 5626306.0   |                                          |            |       |    |                   |       |
| 910.345379 | 6355825.2   |                                          |            |       |    |                   |       |
| 922.426427 | 10344271.6  | $C_{86}H_{110}N_{30}O_{44}P_8S_8$        | 922.424684 | -     | -3 | w8                | 1.890 |
| 1000.35978 | 5485614.4   | $C_{126}H_{160}N_{44}O_{64}P_{11}S_{11}$ | 1000.35921 | -     | -4 | y12 + 1H          | 0.570 |
| 4          |             |                                          |            |       |    |                   |       |
| 1000.86009 | 5657582.0   |                                          |            |       |    |                   |       |
| 5          |             |                                          |            |       |    |                   |       |
| 1015.98131 | 5457066.3   |                                          |            |       |    |                   |       |
| 1          |             |                                          |            |       |    |                   |       |
| 1861.96204 | 6261963.2   |                                          |            |       |    |                   |       |
| 3          |             |                                          |            |       |    |                   |       |
|            |             |                                          | Abs mean   | 0.975 |    |                   |       |
|            |             |                                          | error      |       |    |                   |       |
|            |             |                                          | Abs mean   | 0.678 |    |                   |       |
|            |             |                                          | std dev    |       |    |                   |       |



**Table S20 showing peak list, intensity, elemental composition, and possible assignments with mass errors (ppm) of danvatirsen using 2D-UVPD-MS of eight scans accumulated and no denoising of [M-7H]<sup>7-</sup> precursor ion (note, noise peaks were included to highlight the effect of denoising).**

| Measured <i>mz</i> | Intensity   | Elemental Composition                                                                         | Theoretical <i>mz</i> | Error (ppm) | Charge | Assignment       |
|--------------------|-------------|-----------------------------------------------------------------------------------------------|-----------------------|-------------|--------|------------------|
| 257.880350         | 8656641.1   |                                                                                               |                       |             |        |                  |
| 257.885623         | 20971989.3  |                                                                                               |                       |             |        |                  |
| 319.013154         | 8923661.9   | C <sub>41</sub> H <sub>52</sub> N <sub>6</sub> O <sub>25</sub> P <sub>4</sub> S <sub>4</sub>  | 319.013110            | -0.138      | -4     | d4 - B(dA) - NH3 |
| 383.685016         | 16832640.0  |                                                                                               |                       |             |        |                  |
| 383.739782         | 18728249.9  |                                                                                               |                       |             |        |                  |
| 383.796832         | 30384586.8  |                                                                                               |                       |             |        |                  |
| 383.841274         | 11083282.4  |                                                                                               |                       |             |        |                  |
| 383.852797         | 48936345.1  |                                                                                               |                       |             |        |                  |
| 383.862631         | 9043590.6   |                                                                                               |                       |             |        |                  |
| 383.897121         | 14116631.4  |                                                                                               |                       |             |        |                  |
| 383.908148         | 75367695.8  |                                                                                               |                       |             |        |                  |
| 383.919355         | 12916776.0  |                                                                                               |                       |             |        |                  |
| 383.952884         | 12169487.7  |                                                                                               |                       |             |        |                  |
| 383.963527         | 78840005.0  |                                                                                               |                       |             |        |                  |
| 383.973789         | 9065037.8   |                                                                                               |                       |             |        |                  |
| 384.008457         | 10094076.3  |                                                                                               |                       |             |        |                  |
| 384.019236         | 44266219.5  | C <sub>61</sub> H <sub>75</sub> N <sub>14</sub> O <sub>34</sub> P <sub>6</sub> S <sub>6</sub> | 384.019125            | -0.289      | -5     | c6 - B(T) - 4H   |
| 384.063865         | 7409762.4   |                                                                                               |                       |             |        |                  |
| 384.074677         | 24591650.1  |                                                                                               |                       |             |        |                  |
| 384.130362         | 13692752.2  |                                                                                               |                       |             |        |                  |
| 385.073607         | 10669592.1  |                                                                                               |                       |             |        |                  |
| 385.129184         | 14020356.3  |                                                                                               |                       |             |        |                  |
| 385.184926         | 12929334.0  |                                                                                               |                       |             |        |                  |
| 385.240197         | 8553282.4   |                                                                                               |                       |             |        |                  |
| 385.469652         | 7420791.5   |                                                                                               |                       |             |        |                  |
| 385.541151         | 11781058.6  |                                                                                               |                       |             |        |                  |
| 385.612926         | 10526686.3  |                                                                                               |                       |             |        |                  |
| 385.684355         | 11057577.9  |                                                                                               |                       |             |        |                  |
| 386.528174         | 9132113.4   |                                                                                               |                       |             |        |                  |
| 386.539149         | 66769154.5  |                                                                                               |                       |             |        |                  |
| 386.551490         | 7725611.1   |                                                                                               |                       |             |        |                  |
| 386.599373         | 19763618.2  |                                                                                               |                       |             |        |                  |
| 386.610730         | 75757626.7  |                                                                                               |                       |             |        |                  |
| 386.623652         | 9309687.3   |                                                                                               |                       |             |        |                  |
| 386.671337         | 23824795.5  |                                                                                               |                       |             |        |                  |
| 386.682138         | 178660383.7 |                                                                                               |                       |             |        |                  |
| 386.694210         | 19753646.6  |                                                                                               |                       |             |        |                  |
| 386.742571         | 35468281.5  |                                                                                               |                       |             |        |                  |
| 386.753658         | 208533367.8 |                                                                                               |                       |             |        |                  |
| 386.765844         | 25079126.3  |                                                                                               |                       |             |        |                  |
| 386.814330         | 24054091.6  |                                                                                               |                       |             |        |                  |
| 386.825046         | 196854423.7 |                                                                                               |                       |             |        |                  |
| 386.837024         | 22420827.5  |                                                                                               |                       |             |        |                  |
| 386.885373         | 14947688.9  |                                                                                               |                       |             |        |                  |
| 386.896552         | 94644305.7  |                                                                                               |                       |             |        |                  |
| 386.908615         | 11403562.6  |                                                                                               |                       |             |        |                  |
| 386.956956         | 7347168.5   |                                                                                               |                       |             |        |                  |
| 386.968370         | 32278126.9  |                                                                                               |                       |             |        |                  |
| 387.039433         | 56892624.4  |                                                                                               |                       |             |        |                  |
| 387.052119         | 6797378.6   |                                                                                               |                       |             |        |                  |

387.111064 51447387.3  
 387.182483 28916837.5  
 387.253943 11582320.6  
 388.394884 7563984.9  
 541.458285 9123272.1  
 601.176134 9232661.6  
 601.290031 8412681.5  
 601.393193 7698256.9  
 601.402285 24294772.3  
 601.513525 16352078.2  
 609.307192 6932970.0  
 657.593610 8644245.0  
 676.322540 28892183.2  
 676.415897 10264339.6  
 676.451893 27299838.5  
 676.540136 22448912.7  
 676.573497 18500462.2  
 676.579689 36090250.2  
 676.669898 10885601.6  
 676.691761 20682934.0  
 676.700843 30917891.9  
 676.817986 13903403.9  
 676.828797 31893400.7  
 676.942318 7514385.9  
 676.949219 66563168.5  
 677.072658 17401257.7  
 677.198238 8486095.9  
 679.197871 15938168.1  
 679.695238 9614949.2  
 679.821528 8549446.7  
 690.530828 14405421.7  
 690.540087 18368713.7  
 690.642822 12683531.1  
 690.706187 7351357.8  
 690.734446 11356248.6  
 690.845418 7916596.3  
 691.041177 6929355.7  
 691.235037 7281356.5  
 727.579960 9328618.0  
 751.646966 10703373.8  
 751.788451 14384390.2  
 751.931246 13300777.6  
 752.481725 8039227.1  
 753.147415 8592686.1  
 753.788483 62697771.1  
 753.884982 11313664.5  
 753.931808 123156530.6  
 753.951465 7616655.3  
 754.028362 15691990.3  
 754.074546 160005013.5  
 754.094943 9178387.0  
 754.171932 13365368.3  
 754.217743 112702701.5  
 754.312992 8050238.6  
 754.361566 71742531.7  
 754.505553 21920359.3  
 754.643711 13223443.8  
 755.499481 10063223.2  
 755.645306 7051220.6  
 756.075737 6768089.5

$C_{76}H_{98}N_{25}O_{40}P_7S_7$  609.308004 1.333 -4 w7

|            |            |                                  |            |       |    |                 |
|------------|------------|----------------------------------|------------|-------|----|-----------------|
| 765.479871 | 7915311.8  |                                  |            |       |    |                 |
| 765.593760 | 26529722.1 | $C_{51}H_{67}N_{11}O_{28}P_4S_4$ | 765.592240 | -     | -2 | b5 - B(dC) + 2H |
|            |            |                                  |            | 1.985 |    |                 |
| 765.707975 | 48017151.3 |                                  |            |       |    |                 |
| 765.750766 | 7664544.7  |                                  |            |       |    |                 |
| 765.820125 | 75035043.0 |                                  |            |       |    |                 |
| 765.858337 | 7144588.2  |                                  |            |       |    |                 |
| 765.878587 | 7437041.6  |                                  |            |       |    |                 |
| 765.893996 | 7886030.1  |                                  |            |       |    |                 |
| 765.932480 | 84104951.2 |                                  |            |       |    |                 |
| 766.042858 | 72864709.7 |                                  |            |       |    |                 |
| 766.076834 | 7650789.0  |                                  |            |       |    |                 |
| 766.113954 | 9107772.8  |                                  |            |       |    |                 |
| 766.154971 | 61286850.0 |                                  |            |       |    |                 |
| 766.171674 | 7325082.6  |                                  |            |       |    |                 |
| 766.207469 | 7384172.0  |                                  |            |       |    |                 |
| 766.224912 | 9312248.7  |                                  |            |       |    |                 |
| 766.293351 | 7506562.5  |                                  |            |       |    |                 |
| 766.316365 | 7565533.6  |                                  |            |       |    |                 |
| 766.338951 | 7667617.1  |                                  |            |       |    |                 |
| 766.376809 | 32462177.8 |                                  |            |       |    |                 |
| 766.401838 | 7268344.6  |                                  |            |       |    |                 |
| 766.412633 | 8374147.2  |                                  |            |       |    |                 |
| 766.428863 | 9766740.7  |                                  |            |       |    |                 |
| 766.441624 | 6968114.6  |                                  |            |       |    |                 |
| 766.456620 | 7778964.5  |                                  |            |       |    |                 |
| 766.486035 | 25474524.5 |                                  |            |       |    |                 |
| 766.514688 | 7566258.4  |                                  |            |       |    |                 |
| 766.535818 | 7766018.4  |                                  |            |       |    |                 |
| 766.573457 | 7314461.5  |                                  |            |       |    |                 |
| 766.597112 | 20785553.7 |                                  |            |       |    |                 |
| 766.613570 | 9256426.5  |                                  |            |       |    |                 |
| 766.633357 | 8721036.8  |                                  |            |       |    |                 |
| 766.651472 | 7451550.8  |                                  |            |       |    |                 |
| 766.682829 | 9229190.5  |                                  |            |       |    |                 |
| 766.708067 | 21704972.7 |                                  |            |       |    |                 |
| 766.728389 | 10044179.1 |                                  |            |       |    |                 |
| 766.748883 | 24806535.7 |                                  |            |       |    |                 |
| 766.765365 | 14580612.4 |                                  |            |       |    |                 |
| 766.778108 | 10405591.5 |                                  |            |       |    |                 |
| 766.799014 | 10257429.4 |                                  |            |       |    |                 |
| 766.817063 | 16084595.8 |                                  |            |       |    |                 |
| 766.835335 | 10436934.1 |                                  |            |       |    |                 |
| 766.854973 | 11777340.1 |                                  |            |       |    |                 |
| 766.891642 | 11890937.1 |                                  |            |       |    |                 |
| 766.902723 | 11071573.8 |                                  |            |       |    |                 |
| 766.925417 | 16588885.4 |                                  |            |       |    |                 |
| 766.944466 | 14471870.9 |                                  |            |       |    |                 |
| 766.952496 | 12194357.4 |                                  |            |       |    |                 |
| 766.983077 | 13435280.1 |                                  |            |       |    |                 |
| 766.993559 | 12761704.2 |                                  |            |       |    |                 |
| 767.011613 | 13341510.0 |                                  |            |       |    |                 |
| 767.035791 | 16043397.6 |                                  |            |       |    |                 |
| 767.055857 | 14139508.9 | $C_{71}H_{91}N_{20}O_{40}P_7S_7$ | 767.056382 | 0.684 | -3 | w7 - B(dA) - 2H |
| 767.077162 | 18062552.7 |                                  |            |       |    |                 |
| 767.101050 | 16496119.6 |                                  |            |       |    |                 |
| 767.121941 | 16030045.5 |                                  |            |       |    |                 |
| 767.128311 | 15864570.3 |                                  |            |       |    |                 |
| 767.147197 | 21373936.6 |                                  |            |       |    |                 |
| 767.177479 | 22148388.9 |                                  |            |       |    |                 |

|            |              |                                                                                                |            |       |    |         |
|------------|--------------|------------------------------------------------------------------------------------------------|------------|-------|----|---------|
| 767.217496 | 42954910.5   |                                                                                                |            |       |    |         |
| 767.238327 | 17861632.5   |                                                                                                |            |       |    |         |
| 767.289453 | 38462160.6   |                                                                                                |            |       |    |         |
| 767.310868 | 52835980.9   |                                                                                                |            |       |    |         |
| 767.327883 | 127909438.6  |                                                                                                |            |       |    |         |
| 767.372752 | 1597296408.0 |                                                                                                |            |       |    |         |
| 767.439043 | 235828192.7  |                                                                                                |            |       |    |         |
| 767.484241 | 3090935596.0 |                                                                                                |            |       |    |         |
| 767.508317 | 149383553.8  |                                                                                                |            |       |    |         |
| 767.532707 | 144396165.5  |                                                                                                |            |       |    |         |
| 767.549787 | 296473799.4  |                                                                                                |            |       |    |         |
| 767.595588 | 4370355784.0 |                                                                                                |            |       |    |         |
| 767.625519 | 149263594.0  |                                                                                                |            |       |    |         |
| 767.659648 | 298993761.7  |                                                                                                |            |       |    |         |
| 767.706974 | 4850964395.0 |                                                                                                |            |       |    |         |
| 767.730388 | 207129070.3  |                                                                                                |            |       |    |         |
| 767.770250 | 271996942.9  |                                                                                                |            |       |    |         |
| 767.850051 | 143505734.6  |                                                                                                |            |       |    |         |
| 767.880756 | 224839656.8  |                                                                                                |            |       |    |         |
| 767.929403 | 3542675520.0 |                                                                                                |            |       |    |         |
| 767.958636 | 129578109.0  |                                                                                                |            |       |    |         |
| 767.992475 | 186022848.7  |                                                                                                |            |       |    |         |
| 768.018289 | 94368566.6   |                                                                                                |            |       |    |         |
| 768.040480 | 2832245025.0 |                                                                                                |            |       |    |         |
| 768.071865 | 92901051.1   | C <sub>96</sub> H <sub>123</sub> N <sub>31</sub> O <sub>50</sub> P <sub>9</sub> S <sub>9</sub> | 768.071724 | -     | -4 | c9 + 2H |
|            |              |                                                                                                |            | 0.184 |    |         |
| 768.103310 | 149855512.2  |                                                                                                |            |       |    |         |
| 768.151848 | 2067340777.0 |                                                                                                |            |       |    |         |
| 768.182878 | 82893894.1   |                                                                                                |            |       |    |         |
| 768.213425 | 99765770.7   |                                                                                                |            |       |    |         |
| 768.262999 | 1424182981.0 |                                                                                                |            |       |    |         |
| 768.289512 | 56278443.9   |                                                                                                |            |       |    |         |
| 768.326054 | 70412743.9   |                                                                                                |            |       |    |         |
| 768.374094 | 916677356.7  |                                                                                                |            |       |    |         |
| 768.405893 | 32778638.5   |                                                                                                |            |       |    |         |
| 768.426347 | 35068935.3   |                                                                                                |            |       |    |         |
| 768.436524 | 46338587.4   |                                                                                                |            |       |    |         |
| 768.457803 | 22635806.8   |                                                                                                |            |       |    |         |
| 768.485577 | 559048484.2  |                                                                                                |            |       |    |         |
| 768.516575 | 27280605.2   |                                                                                                |            |       |    |         |
| 768.549158 | 29974307.2   |                                                                                                |            |       |    |         |
| 768.624998 | 17971003.6   |                                                                                                |            |       |    |         |
| 768.634628 | 14896336.4   |                                                                                                |            |       |    |         |
| 768.648281 | 24943118.8   |                                                                                                |            |       |    |         |
| 768.666050 | 19164923.4   |                                                                                                |            |       |    |         |
| 768.682570 | 13137889.5   |                                                                                                |            |       |    |         |
| 768.708144 | 193710879.7  |                                                                                                |            |       |    |         |
| 768.738802 | 12785972.5   |                                                                                                |            |       |    |         |
| 768.757406 | 12139802.1   |                                                                                                |            |       |    |         |
| 768.768835 | 12389309.1   |                                                                                                |            |       |    |         |
| 768.788426 | 26466520.4   |                                                                                                |            |       |    |         |
| 768.819437 | 110746621.2  |                                                                                                |            |       |    |         |
| 768.848915 | 12021074.7   |                                                                                                |            |       |    |         |
| 768.858465 | 9803508.0    |                                                                                                |            |       |    |         |
| 768.882259 | 11061247.9   |                                                                                                |            |       |    |         |
| 768.907285 | 26696996.9   |                                                                                                |            |       |    |         |
| 768.930820 | 60587732.7   |                                                                                                |            |       |    |         |
| 768.958414 | 10887835.9   |                                                                                                |            |       |    |         |
| 768.968324 | 10157657.7   |                                                                                                |            |       |    |         |
| 768.980919 | 8866174.0    |                                                                                                |            |       |    |         |

|            |              |                                   |            |       |    |                 |
|------------|--------------|-----------------------------------|------------|-------|----|-----------------|
| 768.995123 | 8229284.5    |                                   |            |       |    |                 |
| 769.016561 | 8734543.5    |                                   |            |       |    |                 |
| 769.041848 | 45116808.6   |                                   |            |       |    |                 |
| 769.058553 | 8728463.7    |                                   |            |       |    |                 |
| 769.071109 | 9294902.0    | $C_{96}H_{119}N_{35}O_{47}P_9S_9$ | 769.070787 | -     | -4 | x9 - H2O        |
|            |              |                                   |            | 0.419 |    |                 |
| 769.086864 | 12211432.0   |                                   |            |       |    |                 |
| 769.101482 | 8131397.9    | $C_{51}H_{66}N_{15}O_{25}P_4S_4$  | 769.102104 | 0.809 | -2 | z5 - B(dC) + 1H |
| 769.124220 | 7989118.8    |                                   |            |       |    |                 |
| 769.151848 | 29575117.8   |                                   |            |       |    |                 |
| 769.167239 | 21891305.7   |                                   |            |       |    |                 |
| 769.181344 | 9491329.4    |                                   |            |       |    |                 |
| 769.191818 | 8119120.9    |                                   |            |       |    |                 |
| 769.204073 | 8816240.0    |                                   |            |       |    |                 |
| 769.215088 | 11359133.5   |                                   |            |       |    |                 |
| 769.234984 | 9280790.9    |                                   |            |       |    |                 |
| 769.264392 | 43875160.5   |                                   |            |       |    |                 |
| 769.287272 | 18074480.2   |                                   |            |       |    |                 |
| 769.338137 | 7054019.1    |                                   |            |       |    |                 |
| 769.346219 | 7404672.5    |                                   |            |       |    |                 |
| 769.374580 | 52574687.8   |                                   |            |       |    |                 |
| 769.393855 | 7927584.3    |                                   |            |       |    |                 |
| 769.407359 | 16222515.2   |                                   |            |       |    |                 |
| 769.453743 | 7564177.4    |                                   |            |       |    |                 |
| 769.485565 | 48366837.8   |                                   |            |       |    |                 |
| 769.527056 | 11451068.1   |                                   |            |       |    |                 |
| 769.547817 | 11257007.0   |                                   |            |       |    |                 |
| 769.562719 | 7117618.0    |                                   |            |       |    |                 |
| 769.571908 | 8374497.1    |                                   |            |       |    |                 |
| 769.597019 | 45241287.9   |                                   |            |       |    |                 |
| 769.627516 | 9173164.0    |                                   |            |       |    |                 |
| 769.655658 | 17107589.2   |                                   |            |       |    |                 |
| 769.681551 | 15541833.5   |                                   |            |       |    |                 |
| 769.704335 | 187105987.2  |                                   |            |       |    |                 |
| 769.725500 | 19346545.2   |                                   |            |       |    |                 |
| 769.738418 | 14728458.2   |                                   |            |       |    |                 |
| 769.749624 | 13332675.4   |                                   |            |       |    |                 |
| 769.770521 | 45588900.5   |                                   |            |       |    |                 |
| 769.782527 | 23789055.9   |                                   |            |       |    |                 |
| 769.815529 | 541636313.5  |                                   |            |       |    |                 |
| 769.846845 | 25362972.4   |                                   |            |       |    |                 |
| 769.859518 | 26825125.1   |                                   |            |       |    |                 |
| 769.881401 | 78009414.2   |                                   |            |       |    |                 |
| 769.926818 | 974608374.8  |                                   |            |       |    |                 |
| 769.992104 | 107291552.3  |                                   |            |       |    |                 |
| 770.013999 | 49684271.0   |                                   |            |       |    |                 |
| 770.037974 | 1331252105.0 |                                   |            |       |    |                 |
| 770.058282 | 85193123.2   |                                   |            |       |    |                 |
| 770.102801 | 110840194.0  |                                   |            |       |    |                 |
| 770.149251 | 1396191044.0 |                                   |            |       |    |                 |
| 770.180208 | 57828318.0   |                                   |            |       |    |                 |
| 770.193443 | 47501622.5   |                                   |            |       |    |                 |
| 770.214863 | 117338342.8  |                                   |            |       |    |                 |
| 770.260629 | 1309875809.0 |                                   |            |       |    |                 |
| 770.302293 | 39715857.6   |                                   |            |       |    |                 |
| 770.324856 | 96276782.3   |                                   |            |       |    |                 |
| 770.348873 | 51570152.3   |                                   |            |       |    |                 |
| 770.371703 | 1128081442.0 |                                   |            |       |    |                 |
| 770.404547 | 43219341.6   |                                   |            |       |    |                 |
| 770.419272 | 35303783.2   |                                   |            |       |    |                 |

|            |             |                                                                                     |            |       |    |                  |
|------------|-------------|-------------------------------------------------------------------------------------|------------|-------|----|------------------|
| 770.435235 | 67367726.9  |                                                                                     |            |       |    |                  |
| 770.451696 | 38764653.6  |                                                                                     |            |       |    |                  |
| 770.482898 | 803438372.1 |                                                                                     |            |       |    |                  |
| 770.526041 | 36909979.2  |                                                                                     |            |       |    |                  |
| 770.547548 | 54538251.3  |                                                                                     |            |       |    |                  |
| 770.561151 | 32478625.3  |                                                                                     |            |       |    |                  |
| 770.594173 | 558025937.8 |                                                                                     |            |       |    |                  |
| 770.624109 | 27951578.7  |                                                                                     |            |       |    |                  |
| 770.636740 | 22544922.9  |                                                                                     |            |       |    |                  |
| 770.649713 | 31165401.4  |                                                                                     |            |       |    |                  |
| 770.672721 | 23775605.7  |                                                                                     |            |       |    |                  |
| 770.682854 | 27475728.6  |                                                                                     |            |       |    |                  |
| 770.705225 | 354095055.4 |                                                                                     |            |       |    |                  |
| 770.750295 | 26592208.1  |                                                                                     |            |       |    |                  |
| 770.769358 | 28273946.7  |                                                                                     |            |       |    |                  |
| 770.798553 | 185988162.5 |                                                                                     |            |       |    |                  |
| 770.815517 | 188989500.9 |                                                                                     |            |       |    |                  |
| 770.849621 | 15306968.9  |                                                                                     |            |       |    |                  |
| 770.860813 | 14334605.2  |                                                                                     |            |       |    |                  |
| 770.878213 | 17690321.8  |                                                                                     |            |       |    |                  |
| 770.895659 | 40701806.3  |                                                                                     |            |       |    |                  |
| 770.923572 | 110486174.8 |                                                                                     |            |       |    |                  |
| 770.942559 | 369578644.7 |                                                                                     |            |       |    |                  |
| 770.980862 | 13281431.0  |                                                                                     |            |       |    |                  |
| 770.992618 | 13641908.0  |                                                                                     |            |       |    |                  |
| 771.005781 | 12619569.7  |                                                                                     |            |       |    |                  |
| 771.016878 | 15450638.3  |                                                                                     |            |       |    |                  |
| 771.036280 | 77598193.4  |                                                                                     |            |       |    |                  |
| 771.084472 | 543577456.9 |                                                                                     |            |       |    |                  |
| 771.126825 | 14605080.2  |                                                                                     |            |       |    |                  |
| 771.146477 | 38036198.8  |                                                                                     |            |       |    |                  |
| 771.153089 | 37250889.0  |                                                                                     |            |       |    |                  |
| 771.182080 | 43501095.1  |                                                                                     |            |       |    |                  |
| 771.227253 | 601341133.5 |                                                                                     |            |       |    |                  |
| 771.268057 | 37280967.7  |                                                                                     |            |       |    |                  |
| 771.293474 | 13205237.7  |                                                                                     |            |       |    |                  |
| 771.323280 | 43290161.8  |                                                                                     |            |       |    |                  |
| 771.370465 | 604845356.8 |                                                                                     |            |       |    |                  |
| 771.420146 | 20577993.7  |                                                                                     |            |       |    |                  |
| 771.446862 | 14538050.3  |                                                                                     |            |       |    |                  |
| 771.471151 | 54972146.8  |                                                                                     |            |       |    |                  |
| 771.513448 | 471848614.6 |                                                                                     |            |       |    |                  |
| 771.534543 | 36765999.0  |                                                                                     |            |       |    |                  |
| 771.555100 | 20147096.6  |                                                                                     |            |       |    |                  |
| 771.590729 | 158920597.5 |                                                                                     |            |       |    |                  |
| 771.623515 | 29235249.4  |                                                                                     |            |       |    |                  |
| 771.656242 | 323770068.0 |                                                                                     |            |       |    |                  |
| 771.701134 | 289339255.8 |                                                                                     |            |       |    |                  |
| 771.741391 | 37278930.5  |                                                                                     |            |       |    |                  |
| 771.762474 | 47543238.9  |                                                                                     |            |       |    |                  |
| 771.794372 | 172505956.2 |                                                                                     |            |       |    |                  |
| 771.814035 | 363143112.7 |                                                                                     |            |       |    |                  |
| 771.854246 | 24934745.4  |                                                                                     |            |       |    |                  |
| 771.874715 | 44899390.5  | C <sub>121</sub> H <sub>153</sub> N <sub>41</sub> O <sub>62</sub> P <sub>11</sub> S | 771.875151 | 0.565 | -5 | z12 - B(dC) + 1H |
| 771.890974 | 35167982.4  |                                                                                     |            |       |    |                  |
| 771.922801 | 413738086.2 |                                                                                     |            |       |    |                  |
| 771.945276 | 103369240.5 |                                                                                     |            |       |    |                  |
| 771.969420 | 26350636.9  |                                                                                     |            |       |    |                  |
| 771.986182 | 45734690.5  |                                                                                     |            |       |    |                  |

11

|            |              |                                                                                     |            |       |    |        |
|------------|--------------|-------------------------------------------------------------------------------------|------------|-------|----|--------|
| 772.007189 | 28585851.9   |                                                                                     |            |       |    |        |
| 772.033844 | 410709678.9  |                                                                                     |            |       |    |        |
| 772.083802 | 132409968.2  |                                                                                     |            |       |    |        |
| 772.115506 | 26386058.0   |                                                                                     |            |       |    |        |
| 772.145060 | 358604514.4  |                                                                                     |            |       |    |        |
| 772.176907 | 20686760.0   |                                                                                     |            |       |    |        |
| 772.217356 | 42734384.0   |                                                                                     |            |       |    |        |
| 772.256758 | 281526249.3  |                                                                                     |            |       |    |        |
| 772.294405 | 12354534.0   |                                                                                     |            |       |    |        |
| 772.304804 | 11843472.3   |                                                                                     |            |       |    |        |
| 772.343037 | 14667350.4   |                                                                                     |            |       |    |        |
| 772.368155 | 268859200.8  |                                                                                     |            |       |    |        |
| 772.416124 | 43793734.1   |                                                                                     |            |       |    |        |
| 772.437265 | 19592187.9   |                                                                                     |            |       |    |        |
| 772.479681 | 187143024.5  |                                                                                     |            |       |    |        |
| 772.513743 | 20322808.5   |                                                                                     |            |       |    |        |
| 772.530947 | 13103111.9   |                                                                                     |            |       |    |        |
| 772.552263 | 15667978.9   |                                                                                     |            |       |    |        |
| 772.592304 | 137511343.3  |                                                                                     |            |       |    |        |
| 772.620517 | 18755996.0   |                                                                                     |            |       |    |        |
| 772.639770 | 19902292.0   |                                                                                     |            |       |    |        |
| 772.664353 | 21365105.6   |                                                                                     |            |       |    |        |
| 772.675172 | 20188500.3   |                                                                                     |            |       |    |        |
| 772.704247 | 102622980.2  |                                                                                     |            |       |    |        |
| 772.733184 | 25871315.3   |                                                                                     |            |       |    |        |
| 772.743529 | 20072782.0   |                                                                                     |            |       |    |        |
| 772.762363 | 49731025.5   |                                                                                     |            |       |    |        |
| 772.780215 | 26230919.9   |                                                                                     |            |       |    |        |
| 772.817413 | 77696203.0   |                                                                                     |            |       |    |        |
| 772.836795 | 31069361.6   |                                                                                     |            |       |    |        |
| 772.861151 | 32365841.6   |                                                                                     |            |       |    |        |
| 772.912276 | 42439988.7   |                                                                                     |            |       |    |        |
| 772.931339 | 50592212.8   |                                                                                     |            |       |    |        |
| 772.953612 | 54002664.9   |                                                                                     |            |       |    |        |
| 772.965694 | 50362383.2   |                                                                                     |            |       |    |        |
| 772.978547 | 49846068.9   |                                                                                     |            |       |    |        |
| 772.989973 | 58611176.2   |                                                                                     |            |       |    |        |
| 773.001030 | 69729578.9   |                                                                                     |            |       |    |        |
| 773.013031 | 80911190.0   |                                                                                     |            |       |    |        |
| 773.034221 | 390075669.8  |                                                                                     |            |       |    |        |
| 773.080642 | 4975486992.0 | C <sub>172</sub> H <sub>217</sub> N <sub>56</sub> O <sub>88</sub> P <sub>15</sub> S | 773.079889 | 0.974 | -7 | M - 7H |
|            |              | 15                                                                                  |            |       |    |        |
| 773.122564 | 150767221.6  |                                                                                     |            |       |    |        |
| 773.134155 | 189543006.0  |                                                                                     |            |       |    |        |
| 773.145066 | 168246701.5  |                                                                                     |            |       |    |        |
| 773.157619 | 211224159.4  |                                                                                     |            |       |    |        |
| 773.177329 | 855352471.0  |                                                                                     |            |       |    |        |
| 773.223805 | 11105426166. |                                                                                     |            |       |    |        |
|            | 0            |                                                                                     |            |       |    |        |
| 773.254633 | 413886210.5  |                                                                                     |            |       |    |        |
| 773.269161 | 282915467.9  |                                                                                     |            |       |    |        |
| 773.290652 | 284552792.2  |                                                                                     |            |       |    |        |
| 773.304564 | 312332579.1  |                                                                                     |            |       |    |        |
| 773.366876 | 16256423880. |                                                                                     |            |       |    |        |
|            | 0            |                                                                                     |            |       |    |        |
| 773.386526 | 944988484.4  |                                                                                     |            |       |    |        |
| 773.399092 | 453417160.9  |                                                                                     |            |       |    |        |
| 773.417888 | 377346238.4  |                                                                                     |            |       |    |        |
| 773.440928 | 284963752.8  |                                                                                     |            |       |    |        |
| 773.462873 | 1250062511.0 |                                                                                     |            |       |    |        |

|            |              |
|------------|--------------|
| 773.510121 | 16627272261. |
|            | 0            |
| 773.552492 | 324369401.6  |
| 773.562879 | 443121561.9  |
| 773.586902 | 339914321.9  |
| 773.605513 | 1071853333.0 |
| 773.619193 | 557531304.9  |
| 773.652864 | 13986650747. |
|            | 0            |
| 773.684067 | 477401894.3  |
| 773.706275 | 292790257.1  |
| 773.720011 | 263930804.5  |
| 773.747270 | 733837733.1  |
| 773.774632 | 369381294.5  |
| 773.795751 | 9375136039.0 |
| 773.848252 | 241538479.7  |
| 773.857775 | 175167989.9  |
| 773.890171 | 509646171.9  |
| 773.904635 | 270295985.3  |
| 773.938692 | 6401568808.0 |
| 773.967940 | 234336954.5  |
| 773.984210 | 122819907.5  |
| 773.992914 | 167931353.2  |
| 774.004552 | 121169710.8  |
| 774.019021 | 122595183.8  |
| 774.032988 | 301097887.9  |
| 774.051144 | 147128961.0  |
| 774.081459 | 3836077959.0 |
| 774.113338 | 120183719.7  |
| 774.134090 | 93552624.3   |
| 774.149710 | 54407166.6   |
| 774.175963 | 184915621.0  |
| 774.224548 | 2262759064.0 |
| 774.277749 | 56050367.2   |
| 774.288962 | 37698935.5   |
| 774.302193 | 33669672.0   |
| 774.319405 | 104125840.0  |
| 774.336227 | 46923187.9   |
| 774.367214 | 1289311257.0 |
| 774.399117 | 33307293.9   |
| 774.422057 | 19386904.9   |
| 774.434743 | 14766889.7   |
| 774.464072 | 47963348.0   |
| 774.510482 | 672410769.3  |
| 774.563201 | 12053964.3   |
| 774.587051 | 26216891.6   |
| 774.601942 | 22117511.9   |
| 774.653393 | 362586270.4  |
| 774.686382 | 14115030.6   |
| 774.703064 | 22577595.9   |
| 774.749732 | 23379708.9   |
| 774.768033 | 10701516.1   |
| 774.796191 | 167803601.6  |
| 774.823862 | 13583543.2   |
| 774.836049 | 10402153.8   |
| 774.848274 | 10048905.7   |
| 774.862598 | 9344453.2    |
| 774.889038 | 9954087.6    |
| 774.940510 | 79237403.9   |
| 774.968986 | 10299451.2   |



|            |             |
|------------|-------------|
| 774.984648 | 10408719.4  |
| 775.006924 | 9601785.8   |
| 775.021369 | 9005660.2   |
| 775.059647 | 10860000.8  |
| 775.083449 | 58073679.1  |
| 775.105910 | 15282028.8  |
| 775.134867 | 10849784.3  |
| 775.163712 | 8751473.8   |
| 775.174895 | 11318450.7  |
| 775.193244 | 11264301.8  |
| 775.221109 | 22288754.9  |
| 775.244841 | 22228760.3  |
| 775.280949 | 7518977.1   |
| 775.303663 | 8775368.9   |
| 775.326808 | 7550637.4   |
| 775.343748 | 12714350.4  |
| 775.362564 | 20369573.6  |
| 775.395934 | 7111889.3   |
| 775.413052 | 17178275.1  |
| 775.424058 | 8772993.3   |
| 775.453849 | 7365693.4   |
| 775.483707 | 7755999.2   |
| 775.506411 | 21080625.6  |
| 775.530254 | 6781839.2   |
| 775.549816 | 6902517.1   |
| 775.579543 | 10666388.3  |
| 775.598227 | 9508745.4   |
| 775.649739 | 24652995.9  |
| 775.682853 | 14352505.2  |
| 775.710158 | 10045459.7  |
| 775.747457 | 8211004.5   |
| 775.793971 | 22362215.7  |
| 775.823301 | 8411096.3   |
| 775.851717 | 13426021.4  |
| 775.892760 | 7406569.2   |
| 775.938757 | 19937378.6  |
| 776.021460 | 6854534.2   |
| 776.047616 | 7375277.4   |
| 776.083881 | 19860086.8  |
| 776.173245 | 16015389.8  |
| 776.198614 | 11676636.9  |
| 776.221243 | 285498683.1 |
| 776.242662 | 17962018.0  |
| 776.252915 | 10720001.8  |
| 776.274178 | 15848613.2  |
| 776.298651 | 12438711.0  |
| 776.317414 | 29769921.1  |
| 776.329469 | 24173282.0  |
| 776.364388 | 594702781.1 |
| 776.394350 | 23806780.8  |
| 776.419178 | 20080487.6  |
| 776.430346 | 17988885.7  |
| 776.445361 | 19089571.8  |
| 776.460303 | 52060700.0  |
| 776.486022 | 27492300.3  |
| 776.507269 | 731722854.6 |
| 776.530378 | 37252161.2  |
| 776.540367 | 25177257.1  |
| 776.560343 | 25859645.0  |
| 776.602690 | 57710222.2  |

---

|            |             |                                                                                                   |            |       |    |         |
|------------|-------------|---------------------------------------------------------------------------------------------------|------------|-------|----|---------|
| 776.649971 | 725095706.5 |                                                                                                   |            |       |    |         |
| 776.682049 | 27669117.2  |                                                                                                   |            |       |    |         |
| 776.704485 | 21062526.6  |                                                                                                   |            |       |    |         |
| 776.717225 | 14439211.0  |                                                                                                   |            |       |    |         |
| 776.746020 | 47988040.5  |                                                                                                   |            |       |    |         |
| 776.792999 | 607024222.5 |                                                                                                   |            |       |    |         |
| 776.846682 | 18173293.9  |                                                                                                   |            |       |    |         |
| 776.856918 | 11410168.4  |                                                                                                   |            |       |    |         |
| 776.872161 | 12364767.1  |                                                                                                   |            |       |    |         |
| 776.887290 | 32131619.5  |                                                                                                   |            |       |    |         |
| 776.935576 | 440814788.8 |                                                                                                   |            |       |    |         |
| 776.970355 | 14618314.8  |                                                                                                   |            |       |    |         |
| 776.990070 | 9977642.7   |                                                                                                   |            |       |    |         |
| 777.031452 | 20497863.1  |                                                                                                   |            |       |    |         |
| 777.079105 | 291044595.9 |                                                                                                   |            |       |    |         |
| 777.115242 | 6968402.4   |                                                                                                   |            |       |    |         |
| 777.131402 | 7190374.8   |                                                                                                   |            |       |    |         |
| 777.172674 | 13044760.4  |                                                                                                   |            |       |    |         |
| 777.221839 | 183967954.8 |                                                                                                   |            |       |    |         |
| 777.244387 | 7580327.7   |                                                                                                   |            |       |    |         |
| 777.365078 | 79690634.3  |                                                                                                   |            |       |    |         |
| 777.507896 | 37454301.7  |                                                                                                   |            |       |    |         |
| 777.648471 | 17951338.7  |                                                                                                   |            |       |    |         |
| 777.791253 | 6818947.9   |                                                                                                   |            |       |    |         |
| 778.076083 | 9651437.6   | C <sub>96</sub> H <sub>123</sub> N <sub>35</sub> O <sub>49</sub> P <sub>9</sub> S <sub>9</sub>    | 778.076070 | -     | -4 | w9 + 1H |
|            |             |                                                                                                   |            | 0.017 |    |         |
| 778.498714 | 24500190.8  |                                                                                                   |            |       |    |         |
| 778.597585 | 8298690.2   |                                                                                                   |            |       |    |         |
| 778.639226 | 57729507.5  |                                                                                                   |            |       |    |         |
| 778.646012 | 54724759.7  |                                                                                                   |            |       |    |         |
| 778.785285 | 85269439.2  |                                                                                                   |            |       |    |         |
| 778.887232 | 13188379.1  |                                                                                                   |            |       |    |         |
| 778.927924 | 79382804.2  |                                                                                                   |            |       |    |         |
| 779.028151 | 8524411.3   |                                                                                                   |            |       |    |         |
| 779.071565 | 79802423.2  |                                                                                                   |            |       |    |         |
| 779.214297 | 79367754.6  |                                                                                                   |            |       |    |         |
| 779.242453 | 10950813.0  |                                                                                                   |            |       |    |         |
| 779.357798 | 53357890.6  |                                                                                                   |            |       |    |         |
| 779.500683 | 40039012.9  |                                                                                                   |            |       |    |         |
| 779.643431 | 22082694.8  |                                                                                                   |            |       |    |         |
| 779.786491 | 17233488.6  |                                                                                                   |            |       |    |         |
| 818.112383 | 6794372.7   |                                                                                                   |            |       |    |         |
| 819.073182 | 13340338.9  | C <sub>126</sub> H <sub>160</sub> N <sub>44</sub> O <sub>66</sub> P <sub>12</sub> S <sub>12</sub> | 819.073048 | -     | -5 | w12     |
|            |             |                                                                                                   |            | 0.164 |    |         |
| 823.338965 | 15941860.2  |                                                                                                   |            |       |    |         |
| 823.586277 | 12841415.6  |                                                                                                   |            |       |    |         |
| 823.838104 | 11721384.7  | C <sub>106</sub> H <sub>134</sub> N <sub>33</sub> O <sub>54</sub> P <sub>9</sub> S <sub>9</sub>   | 823.839695 | 1.931 | -4 | a10     |
| 838.037967 | 17118344.9  |                                                                                                   |            |       |    |         |
| 838.160431 | 13680471.0  |                                                                                                   |            |       |    |         |
| 838.285630 | 14883931.8  |                                                                                                   |            |       |    |         |
| 846.797400 | 6892070.3   |                                                                                                   |            |       |    |         |
| 847.043716 | 8538234.6   |                                                                                                   |            |       |    |         |
| 855.485996 | 7527473.0   |                                                                                                   |            |       |    |         |
| 857.913434 | 9740521.8   |                                                                                                   |            |       |    |         |
| 858.079095 | 22707370.8  |                                                                                                   |            |       |    |         |
| 858.245104 | 24569875.9  |                                                                                                   |            |       |    |         |
| 858.411654 | 24419174.5  |                                                                                                   |            |       |    |         |
| 858.582185 | 11795701.8  |                                                                                                   |            |       |    |         |
| 863.423365 | 9257425.5   |                                                                                                   |            |       |    |         |
| 863.502943 | 9004017.1   |                                                                                                   |            |       |    |         |

|            |            |                                   |            |       |    |                   |
|------------|------------|-----------------------------------|------------|-------|----|-------------------|
| 863.540613 | 30456456.1 |                                   |            |       |    |                   |
| 863.622009 | 16230759.7 |                                   |            |       |    |                   |
| 863.669581 | 28428442.4 |                                   |            |       |    |                   |
| 863.690016 | 6954755.0  |                                   |            |       |    |                   |
| 863.742958 | 24896851.4 |                                   |            |       |    |                   |
| 863.794101 | 11049619.2 |                                   |            |       |    |                   |
| 863.812968 | 10541888.2 |                                   |            |       |    |                   |
| 863.873531 | 15805313.7 |                                   |            |       |    |                   |
| 863.911102 | 10999936.5 |                                   |            |       |    |                   |
| 863.930959 | 59169357.9 |                                   |            |       |    |                   |
| 863.999201 | 9157179.8  |                                   |            |       |    |                   |
| 864.044489 | 28743633.6 |                                   |            |       |    |                   |
| 864.060318 | 34526395.1 |                                   |            |       |    |                   |
| 864.190599 | 18432005.4 |                                   |            |       |    |                   |
| 881.429354 | 30731512.7 |                                   |            |       |    |                   |
| 881.763585 | 36108378.6 | $C_{86}H_{107}N_{26}O_{44}P_7S_7$ | 881.764150 | 0.641 | -3 | b8 - H2O, a8 - 2H |
| 882.095115 | 28213411.9 |                                   |            |       |    |                   |
| 882.432794 | 17508216.6 |                                   |            |       |    |                   |
| 887.097147 | 38087141.8 | $C_{56}H_{73}N_{18}O_{29}P_5S_5$  | 887.096848 | -     | -2 | w5                |
|            |            |                                   |            | 0.337 |    |                   |
| 887.598473 | 20564042.2 |                                   |            |       |    |                   |
| 888.095407 | 15379331.4 |                                   |            |       |    |                   |
| 892.028580 | 7138695.0  |                                   |            |       |    |                   |
| 897.281582 | 9067102.2  |                                   |            |       |    |                   |
| 897.490715 | 8594083.1  |                                   |            |       |    |                   |
| 901.928224 | 12664794.7 |                                   |            |       |    |                   |
| 902.108499 | 9956741.9  |                                   |            |       |    |                   |
| 902.273135 | 13098591.9 |                                   |            |       |    |                   |
| 902.446854 | 9072733.1  |                                   |            |       |    |                   |
| 903.041916 | 6816826.7  |                                   |            |       |    |                   |
| 903.112826 | 17462435.3 |                                   |            |       |    |                   |
| 908.531432 | 14333233.3 |                                   |            |       |    |                   |
| 908.701856 | 17335175.0 |                                   |            |       |    |                   |
| 908.869981 | 13181447.1 |                                   |            |       |    |                   |
| 909.036925 | 10337608.1 |                                   |            |       |    |                   |
| 909.341151 | 11492177.5 |                                   |            |       |    |                   |
| 909.600032 | 10370016.7 |                                   |            |       |    |                   |
| 909.847562 | 13138697.4 |                                   |            |       |    |                   |
| 922.425899 | 32021112.2 | $C_{86}H_{110}N_{30}O_{44}P_8S_8$ | 922.424684 | -     | -3 | w8                |
|            |            |                                   |            | 1.317 |    |                   |
| 923.090975 | 24169173.5 |                                   |            |       |    |                   |
| 923.427959 | 14297625.2 |                                   |            |       |    |                   |
| 950.991004 | 6843093.9  |                                   |            |       |    |                   |
| 958.041584 | 9192465.5  |                                   |            |       |    |                   |
| 967.470197 | 9175102.6  |                                   |            |       |    |                   |
| 967.613890 | 12348946.2 |                                   |            |       |    |                   |
| 967.757693 | 10202367.7 |                                   |            |       |    |                   |
| 967.900938 | 8335023.4  |                                   |            |       |    |                   |
| 979.117683 | 7700500.8  |                                   |            |       |    |                   |
| 984.191665 | 12355787.1 |                                   |            |       |    |                   |
| 984.335479 | 15020440.6 |                                   |            |       |    |                   |
| 984.481228 | 15450198.8 |                                   |            |       |    |                   |
| 984.620918 | 9216482.2  |                                   |            |       |    |                   |
| 984.906446 | 8186525.1  |                                   |            |       |    |                   |
| 986.478745 | 7515548.8  |                                   |            |       |    |                   |
| 986.621437 | 30379061.6 |                                   |            |       |    |                   |
| 986.765452 | 50397702.1 |                                   |            |       |    |                   |
| 986.891349 | 14630271.3 |                                   |            |       |    |                   |
| 986.908574 | 37803636.5 |                                   |            |       |    |                   |
| 986.990502 | 7617235.7  |                                   |            |       |    |                   |

|            |            |                                                                                               |            |       |    |                     |  |
|------------|------------|-----------------------------------------------------------------------------------------------|------------|-------|----|---------------------|--|
| 987.041067 | 25038811.2 |                                                                                               |            |       |    |                     |  |
| 987.057533 | 23155637.9 |                                                                                               |            |       |    |                     |  |
| 987.133593 | 9249860.6  |                                                                                               |            |       |    |                     |  |
| 987.181471 | 9553756.6  |                                                                                               |            |       |    |                     |  |
| 987.208915 | 14909817.2 |                                                                                               |            |       |    |                     |  |
| 987.333111 | 15988680.1 |                                                                                               |            |       |    |                     |  |
| 987.350783 | 17650542.9 |                                                                                               |            |       |    |                     |  |
| 987.644083 | 20778677.0 |                                                                                               |            |       |    |                     |  |
| 987.767679 | 27360600.0 |                                                                                               |            |       |    |                     |  |
| 987.919835 | 9001970.1  |                                                                                               |            |       |    |                     |  |
| 989.604414 | 7918685.6  |                                                                                               |            |       |    |                     |  |
| 989.849791 | 11652214.7 |                                                                                               |            |       |    |                     |  |
| 989.902275 | 16627351.2 |                                                                                               |            |       |    |                     |  |
| 990.045534 | 6784933.6  | C <sub>31</sub> H <sub>34</sub> N <sub>10</sub> O <sub>16</sub> P <sub>3</sub> S <sub>3</sub> | 990.045648 | 0.115 | -1 | x3 - B(dC) - 4H     |  |
| 990.101709 | 9883677.7  | C <sub>126</sub> H <sub>159</sub> N <sub>40</sub> O <sub>65</sub> P <sub>11</sub> S           | 990.102912 | 1.215 | -4 | a12                 |  |
|            |            | 11                                                                                            |            |       |    |                     |  |
| 990.332223 | 15735595.8 |                                                                                               |            |       |    |                     |  |
| 1024.09369 | 17325694.8 | C <sub>126</sub> H <sub>160</sub> N <sub>44</sub> O <sub>66</sub> P <sub>12</sub> S           | 1024.09313 | -     | -4 | w12                 |  |
| 5          |            | 12                                                                                            | 0          | 0.552 |    |                     |  |
| 1024.59386 | 23680214.9 |                                                                                               |            |       |    |                     |  |
| 5          |            |                                                                                               |            |       |    |                     |  |
| 1024.84373 | 15654884.1 |                                                                                               |            |       |    |                     |  |
| 3          |            |                                                                                               |            |       |    |                     |  |
| 1037.42946 | 8761831.7  |                                                                                               |            |       |    |                     |  |
| 9          |            |                                                                                               |            |       |    |                     |  |
| 1037.76563 | 10246394.0 |                                                                                               |            |       |    |                     |  |
| 7          |            |                                                                                               |            |       |    |                     |  |
| 1038.10063 | 8877070.9  | C <sub>131</sub> H <sub>166</sub> N <sub>41</sub> O <sub>68</sub> P <sub>12</sub> S           | 1038.10001 | -     | -4 | a13 - B(T)          |  |
| 8          |            | 12                                                                                            | 9          | 0.596 |    |                     |  |
| 1052.10039 | 20312183.6 | C <sub>65</sub> H <sub>82</sub> N <sub>23</sub> O <sub>34</sub> P <sub>6</sub> S <sub>6</sub> | 1052.09994 | -     | -2 | w6 - CH3            |  |
| 3          |            |                                                                                               | 9          | 0.422 |    |                     |  |
| 1052.50199 | 65765968.9 |                                                                                               |            |       |    |                     |  |
| 8          |            |                                                                                               |            |       |    |                     |  |
| 1052.70190 | 57797811.6 |                                                                                               |            |       |    |                     |  |
| 7          |            |                                                                                               |            |       |    |                     |  |
| 1052.90316 | 41694668.8 |                                                                                               |            |       |    |                     |  |
| 0          |            |                                                                                               |            |       |    |                     |  |
| 1053.10448 | 21134328.6 |                                                                                               |            |       |    |                     |  |
| 8          |            |                                                                                               |            |       |    |                     |  |
| 1053.30344 | 15914960.1 |                                                                                               |            |       |    |                     |  |
| 3          |            |                                                                                               |            |       |    |                     |  |
| 1055.70117 | 21847097.9 |                                                                                               |            |       |    |                     |  |
| 3          |            |                                                                                               |            |       |    |                     |  |
| 1055.90133 | 20703807.7 |                                                                                               |            |       |    |                     |  |
| 0          |            |                                                                                               |            |       |    |                     |  |
| 1057.70147 | 8922578.9  |                                                                                               |            |       |    |                     |  |
| 0          |            |                                                                                               |            |       |    |                     |  |
| 1057.90046 | 9687990.8  |                                                                                               |            |       |    |                     |  |
| 6          |            |                                                                                               |            |       |    |                     |  |
| 1059.61078 | 8378460.2  | C <sub>66</sub> H <sub>85</sub> N <sub>23</sub> O <sub>34</sub> P <sub>6</sub> S <sub>6</sub> | 1059.61168 | 0.855 | -2 | w6                  |  |
| 0          |            |                                                                                               | 6          |       |    |                     |  |
| 1075.61062 | 18157275.7 | C <sub>136</sub> H <sub>170</sub> N <sub>46</sub> O <sub>69</sub> P <sub>12</sub> S           | 1075.61041 | -     | -4 | z13 - 2H, y13 - H2O |  |
| 6          |            | 12                                                                                            | 5          | 0.196 |    |                     |  |
| 1075.86059 | 21566338.9 |                                                                                               |            |       |    |                     |  |
| 6          |            |                                                                                               |            |       |    |                     |  |
| 1076.10952 | 31789891.9 |                                                                                               |            |       |    |                     |  |
| 6          |            |                                                                                               |            |       |    |                     |  |
| 1076.36249 | 19918459.5 |                                                                                               |            |       |    |                     |  |
| 4          |            |                                                                                               |            |       |    |                     |  |
| 1076.60974 | 11074148.9 |                                                                                               |            |       |    |                     |  |

|            |             |                                     |            |       |    |        |  |
|------------|-------------|-------------------------------------|------------|-------|----|--------|--|
| 4          |             |                                     |            |       |    |        |  |
| 1077.11505 | 9716309.0   |                                     |            |       |    |        |  |
| 2          |             |                                     |            |       |    |        |  |
| 1079.72018 | 9631687.1   |                                     |            |       |    |        |  |
| 3          |             |                                     |            |       |    |        |  |
| 1080.11064 | 8700829.1   | $C_{136}H_{172}N_{46}O_{70}P_{12}S$ | 1080.11305 | 2.235 | -4 | y13    |  |
| 2          |             | 12                                  | 6          |       |    |        |  |
| 1082.21699 | 8519980.8   |                                     |            |       |    |        |  |
| 2          |             |                                     |            |       |    |        |  |
| 1082.31042 | 91427515.1  | $C_{172}H_{215}N_{56}O_{88}P_{15}S$ | 1082.31162 | 1.108 | -5 | M - 7H |  |
| 7          |             | 15                                  | 6          |       |    |        |  |
| 1082.42000 | 17807981.2  |                                     |            |       |    |        |  |
| 0          |             |                                     |            |       |    |        |  |
| 1082.61934 | 27936228.5  |                                     |            |       |    |        |  |
| 7          |             |                                     |            |       |    |        |  |
| 1082.71092 | 290822154.8 |                                     |            |       |    |        |  |
| 7          |             |                                     |            |       |    |        |  |
| 1082.77534 | 10247466.8  |                                     |            |       |    |        |  |
| 7          |             |                                     |            |       |    |        |  |
| 1082.82092 | 23952903.1  |                                     |            |       |    |        |  |
| 6          |             |                                     |            |       |    |        |  |
| 1082.87042 | 12363494.5  |                                     |            |       |    |        |  |
| 4          |             |                                     |            |       |    |        |  |
| 1082.91121 | 262512049.7 |                                     |            |       |    |        |  |
| 3          |             |                                     |            |       |    |        |  |
| 1082.95935 | 9698080.3   |                                     |            |       |    |        |  |
| 9          |             |                                     |            |       |    |        |  |
| 1083.01680 | 17718902.3  |                                     |            |       |    |        |  |
| 5          |             |                                     |            |       |    |        |  |
| 1083.11329 | 217877851.8 |                                     |            |       |    |        |  |
| 7          |             |                                     |            |       |    |        |  |
| 1083.20654 | 10912824.6  |                                     |            |       |    |        |  |
| 6          |             |                                     |            |       |    |        |  |
| 1083.30255 | 24410733.2  |                                     |            |       |    |        |  |
| 3          |             |                                     |            |       |    |        |  |
| 1083.33102 | 33347164.2  |                                     |            |       |    |        |  |
| 4          |             |                                     |            |       |    |        |  |
| 1087.50809 | 9032103.1   |                                     |            |       |    |        |  |
| 4          |             |                                     |            |       |    |        |  |
| 1087.52515 | 7067506.1   |                                     |            |       |    |        |  |
| 4          |             |                                     |            |       |    |        |  |
| 1136.12991 | 21818470.2  |                                     |            |       |    |        |  |
| 3          |             |                                     |            |       |    |        |  |
| 1137.14080 | 7075498.9   |                                     |            |       |    |        |  |
| 1          |             |                                     |            |       |    |        |  |
| 1150.63208 | 11715550.0  |                                     |            |       |    |        |  |
| 5          |             |                                     |            |       |    |        |  |
| 1151.13531 | 10267921.4  |                                     |            |       |    |        |  |
| 6          |             |                                     |            |       |    |        |  |
| 1151.63887 | 8612569.8   |                                     |            |       |    |        |  |
| 1          |             |                                     |            |       |    |        |  |
| 1151.89876 | 9908946.0   |                                     |            |       |    |        |  |
| 1          |             |                                     |            |       |    |        |  |
| 1152.05354 | 15065953.7  |                                     |            |       |    |        |  |
| 3          |             |                                     |            |       |    |        |  |
| 1382.68691 | 18903335.0  |                                     |            |       |    |        |  |
| 1          |             |                                     |            |       |    |        |  |

Abs mean 0.788  
error  
Abs mean 0.677



## Supporting References

1. L. Chiron, M. A. v. Agthoven, B. Kieffer, C. Rolando and M.-A. Delsuc, *PNAS*, 2014, **111**, 1385-1390.
2. L. Chiron, M.-A. Coutouly, J.-P. Starck, C. Rolando and M.-A. Delsuc, *arXiv preprint arXiv:1608.06777*, 2016, 1-13.
